# Supplementary material for: Transcriptomic and genomic analysis highlights the basis of ZYMV tolerance in zucchini
Source: Research Square preprint supplement (doi:10.21203/rs.3.rs-134049/v1), 2021-01-04
Supplement: Supplementary file 1 [file 49f647b374477a587100142c.xlsx]

## Sheet: TITLE PAGE
				Transcriptomic and genomic analysis highlights the basis of ZYMV tolerance in zucchini
				Amoroso CG1, Andolfo G1, Capuozzo C1, Di Donato A1, Martinez C2, Tomassoli L3, Ercolano MR*
				1 Department of Agricultural Science – University of Naples “Federico II” – Portici (NA)
				2 Department of Biology and Geology, Research Centers CIAIMBITAL and CeiA3, University of Almería, 04120 Almería, Spain
				3 Consiglio per la Ricerca in Agricoltura e l'Analisi dell'Economia Agraria, Research Centre of Plant Control and Certification, Rome, Italy

## Sheet: Additional Table 1
Transcriptomic and genomic analysis highlights the basis of ZYMV tolerance in zucchini
Amoroso CG1, Andolfo G1, Capuozzo C1, Di Donato A1, Martinez C2, Tomassoli L3, Ercolano MR*
1 Department of Agricultural Science – University of Naples “Federico II” – Portici (NA)
2 Department of Biology and Geology, Research Centers CIAIMBITAL and CeiA3, University of Almería, 04120 Almería, Spain
3 Consiglio per la Ricerca in Agricoltura e l'Analisi dell'Economia Agraria, Research Centre of Plant Control and Certification, Rome, Italy
Table S1. Number of short variants (SNV and InDel) identified in TF and 381e. For each C. pepo linkage group (LG) the length, percentage of expressed genes (EGs) and number of normalised variants are reported.
Linkage group (CPv4.1)	LG size	Gene	Expressed gene (%)A			Number of Variants (%)B			Normalised variants
	(Mb)	(n.)	TF	381e		TF	381e		TFC	381eC	TFD	381eD
LG01	21,2	3177	1898 (59,7)	1791 (56,4)		5935 (9,4)	15755 (19,4)		279,9	743	3,1	8,7
LG02	14,4	2162	1283 (59,3)	1229 (56,8)		4844 (7,7)	5188 (6,4)		337,3	361,2	3,7	4,2
LG03	13,4	2255	1284 (56,9)	1229 (54,5)		5556 (8,8)	5668 (7)		415,4	423,8	4,3	4,6
LG04	12,7	2036	1209 (59,4)	1166 (57,3)		2787 (4,4)	2906 (3,6)		219,4	228,7	2,3	2,4
LG05	10,9	1884	1119 (59,4)	1073 (56,9)		2602 (4,1)	2494 (3,1)		239,6	229,7	2,3	2,3
LG06	10,7	1305	741 (56,8)	721 (55,2)		3613 (5,7)	3722 (4,6)		338,7	348,9	4,8	5,1
LG07	9,7	1393	813 (58,4)	787 (56,5)		3250 (5,2)	3415 (4,2)		333,0	349,9	3,9	4,3
LG08	10	1683	1016 (60,4)	970 (57,6)		2023 (3,2)	7959 (9,8)		201,2	791,4	1,9	8,2
LG09	9,9	1421	835 (58,8)	791 (55,7)		1660 (2,6)	1675 (2,1)		167,5	169,0	1,9	2,1
LG10	9,8	1550	882 (56,9)	854 (55,1)		2834 (4,5)	2985 (3,7)		288,4	303,7	3,2	3,4
LG11	9,8	1399	803 (57,4)	782 (55,9)		3997 (6,3)	4184 (5,2)		406,9	425,9	4,9	5,3
LG12	9	1445	843 (58,3)	813 (56,3)		3852 (6,1)	3987 (4,9)		427,5	442,5	4,5	4,9
LG13	8,3	1441	858 (59,5)	826 (57,3)		4632 (7,3)	4803 (5,9)		557,7	578,2	5,3	5,8
LG14	8,9	1299	775 (59,66)	735 (56,58)		3032 (4,8)	3154 (3,9)		338,7	352,3	3,9	4,2
LG15	8,8	1113	635 (57,05)	617 (55,43)		1813 (2,9)	1901 (2,3)		205,7	215,7	2,8	3
LG16	8,0	1181	669 (56,64)	644 (54,53)		2563 (4,1)	2688 (3,3)		316,4	331,9	3,8	4,1
LG17	7,9	1377	823 (59,76)	780 (56,64)		1864 (3)	1970 (2,4)		236,2	249,7	2,2	2,5
LG18	8,3	1197	711 (59,39)	688 (57,47)		2172 (3,4)	2311 (2,8)		260,8	277,5	3	3,3
LG19	8,2	1463	823 (56,25)	788 (53,86)		3020 (4,8)	3245 (4)		366,5	393,8	3,6	4,1
LG20	8,1	1132	630 (55,65)	594 (52,47)		1044 (1,7)	1094 (1,3)		128,7	134,8	1,6	1,8
A) Percentage of expressed loci for LG. B) Percentage of total short variants mapped on the genome. Average numbers of short variants for C) 1Mb and D) expressed locus.

## Sheet: Additional Table 2
Table S2. Number of short variants (SNV and InDel) identified in TF and 381e. For each C. pepo linkage group (LG) the length, percentage of expressed genes (EGs) and number of normalised variants are reported.
Linkage group	Scaffold	LG size	Gene	Expressed gene (%)A			Number of Variants (%)B			Normalised variants
(CPv4.1)	(CPv3.2)	(Mb)	(n.)	TF	381e		TF	381e		TFC	381eC	TFD	381eD
LG01	105	0,5	43	22 (51,1)	21 (48,8)		83 (1,4)	423 (2,7)		81,7	416,5	3,8	20,1
LG01	32	2,2	360	230 (63,8)	198 (55)		453 (7,6)	6230 (39,5)		101,1	1389,8	2	31,5
LG01	24	2,5	454	289 (63,6)	276 (60,8)		492 (8,2)	4053 (25,7)		97,4	802,3	1,7	14,7
LG08	3	4,9	827	488 (59)	467 (56,5)		1056 (17,8)	4776 (30,3)		108,3	489,8	2,2	10,2
LG08	89	0,6	43	22 (51,1)	22 (51,1)		75 (1,3)	452 (2,9)		58,4	351,9	3,4	20,5
LG08	8	3,9	720	451 (62,6)	428 (59,4)		785 (12,2)	2626 (16,7)		98,2	328,6	1,7	6,1
A) Percentage of expressed loci for LG. B) Percentage of total short variants mapped for LG. Average numbers of short variants for C) 0,5Mb and D) expressed locus.

## Sheet: Additional Table 3
Table S3. Validation of 6 polymorphic loci located on putative genomic regions introgressed from ‘Menina’. For each amplicon, locus name, primer and polymorphism information are reported.
Marker ID	Locus name	Primer sequences	Amplicon size	Validation	Comparison
(CAPS)	(Andolfo et al. 2017)	(5’-3’)	(bp)
LG01SNP1	Cup000105g039903.1	ATCAATCAGGGTCATCCACCTA	651	Sequencing	TF	381e
		TCAGCCTTTCCCAAGTTATTCG
LG01SNP5	Cup000032g025434.1	CTACTTATGTCGAGTGCTTGGG	787	Sequencing	TF	381e
		TGATTTAAAGGTGTCTGGCTGG
LG01SNP8	Cup000024g021074.1	GCAGAACCAGATCTTCCTGTTT	790	Sequencing	TF	381e
		TCTTGCTAATGGTGGTCGATTG
LG08SNP1	Cup000003g003199.1	GGGGATACTTTATGCATCCAGG	790	Sequencing	TF	381e
		CCGGGTAGTCATCAACAACATT
LG08SNP4	Cup000003g002586.1	CTCAGTGGGTCATGTGTCATTT	719	Sequencing	TF	381e
		ACCCAGCTTTTAAGGTCAGTTC
LG01SNP5	Cup000032g025434.1	ATGGGTGTGTATTTCGGAACAG	787	Sequencing	TF	381e
		TTGATTGAACGAAACTTTGCGC

## Sheet: (1) Expressed genes
Gene_ID	SUSCEPTIBLE	RESISTANT	SUSCEPTIBLE			RESISTANT						Expressed genes Overlapped	Expressed genes					Private expressed genes
	Averange_TF_BRs_12DPI	Averange_381_BRs_12DPI	TF_1^BR_12DPI	TF_2^BR_12DPI	TF_3^BR_12DPI	381_1^BR_12DPI	381_2^BR_12DPI	381_3^BR_12DPI				Venn intersection	TF_Expressed Genes	381_Expressed Genes				381_PRIVATI_Expressed Genes	TF_PRIVATI_Expressed Genes
Cup000001g000011.A	0	0	0	0	0	0	0	0				Cup001945g046032.1	Cup000022g019916.A	Cup000035g026922.1				Cup000035g026922.1	Cup000022g019916.A
Cup000001g000019.A	0	0	0	0	0	0	0	0				Cup000098g039332.A	Cup000004g004217.A	Cup001945g046032.1				Cup000033g025951.1	Cup000004g004217.A
Cup000001g000020.1	0	0	0	0	0	0	0	0				Cup000008g008740.A	Cup000388g044429.1	Cup000098g039332.A				Cup000032g025244.1	Cup000388g044429.1
Cup000001g000033.A	0	0	0	0	0	0	0	0				Cup000030g024385.1	Cup000972g045444.A	Cup000033g025951.1				Cup000097g039205.1	Cup000972g045444.A
Cup000001g000046.A	0	0	0	0	0	0	0	0				Cup000003g002601.1	Cup000024g021169.1	Cup000008g008740.A				Cup000022g019965.1	Cup000024g021169.1
Cup000001g000099.1	0	0	0	0	0	0	0	0				Cup000107g040034.1	Cup000052g032994.A	Cup000030g024385.1				Cup000011g011293.1	Cup000052g032994.A
Cup000001g000107.A	0	0	0	0	0	0	0	0				Cup000251g043793.1	Cup000032g025340.1	Cup000003g002601.1				Cup000042g029680.A	Cup000032g025340.1
Cup000001g000112.1	0	0	0	0	0	0	0	0				Cup000017g016649.1	Cup002084g046087.1	Cup000107g040034.1				Cup000012g012234.1	Cup002084g046087.1
Cup000001g000144.A	0	0	0	0	0	0	0	0				Cup000035g026569.A	Cup000042g029581.A	Cup000251g043793.1				Cup000012g012756.1	Cup000042g029581.A
Cup000001g000152.A	0	0	0	0	0	0	0	0				Cup000004g003905.1	Cup000023g020523.1	Cup000017g016649.1				Cup000020g018796.1	Cup000023g020523.1
Cup000001g000167.A	0	0	0	0	0	0	0	0				Cup000391g044444.1	Cup000032g025113.A	Cup000035g026569.A				Cup000021g019445.1	Cup000032g025113.A
Cup000001g000194.1	0	0	0	0	0	0	0	0				Cup000030g024333.1	Cup000006g006492.A	Cup000004g003905.1				Cup000051g032563.1	Cup000006g006492.A
Cup000001g000207.A	0	0	0	0	0	0	0	0				Cup000041g029008.1	Cup002888g046392.1	Cup000391g044444.1				Cup000009g009204.1	Cup002888g046392.1
Cup000001g000223.A	0	0	0	0	0	0	0	0				Cup000013g013740.1	Cup000032g025158.1	Cup000030g024333.1				Cup000020g018584.1	Cup000032g025158.1
Cup000001g000272.A	0	0	0	0	0	0	0	0				Cup000010g010143.1	Cup000032g025481.A	Cup000041g029008.1				Cup000040g028654.A	Cup000032g025481.A
Cup000001g000284.A	0	0	0	0	0	0	0	0				Cup000008g008075.1	Cup000032g025256.A	Cup000013g013740.1				Cup000140g041465.1	Cup000032g025256.A
Cup000001g000298.A	0	0	0	0	0	0	0	0				Cup000013g013635.1	Cup000032g025420.1	Cup000032g025244.1				Cup000019g018236.1	Cup000032g025420.1
Cup000001g000302.1	0	0	0	0	0	0	0	0				Cup000062g034815.1	Cup000012g012833.1	Cup000010g010143.1				Cup000021g019119.1	Cup000012g012833.1
Cup000001g000369.A	0	0	0	0	0	0	0	0				Cup000117g040543.1	Cup000081g037383.A	Cup000008g008075.1				Cup000005g005268.1	Cup000081g037383.A
Cup000001g000401.A	0	0	0	0	0	0	0	0				Cup000003g003349.1	Cup001022g045471.1	Cup000013g013635.1				Cup000009g009343.1	Cup001022g045471.1
Cup000001g000437.1	0	0	0	0	0	0	0	0				Cup000006g006611.1	Cup000007g007695.A	Cup000097g039205.1				Cup000064g035191.1	Cup000007g007695.A
Cup000001g000440.1	0	0	0	0	0	0	0	0				Cup000031g024574.1	Cup000014g014520.1	Cup000062g034815.1				Cup000003g002716.1	Cup000014g014520.1
Cup000001g000447.A	0	0	0	0	0	0	0	0				Cup000062g034830.1	Cup000022g020133.1	Cup000117g040543.1				Cup000122g040746.1	Cup000022g020133.1
Cup000001g000454.A	0	0	0	0	0	0	0	0				Cup000032g025427.1	Cup000008g008405.A	Cup000003g003349.1				Cup000012g012690.A	Cup000008g008405.A
Cup000001g000458.A	0	0	0	0	0	0	0	0				Cup000060g034388.1	Cup000004g003900.1	Cup000022g019965.1				Cup000016g016184.A	Cup000004g003900.1
Cup000001g000463.A	0	0	0	0	0	0	0	0				Cup000026g022465.1	Cup000024g020776.A	Cup000006g006611.1				Cup000046g031254.1	Cup000024g020776.A
Cup000001g000466.A	0	0	0	0	0	0	0	0				Cup000032g025392.1	Cup000032g025213.A	Cup000011g011293.1				Cup000009g009865.1	Cup000032g025213.A
Cup000001g000470.A	0	0	0	0	0	0	0	0				Cup000007g007676.1	Cup000032g025462.1	Cup000031g024574.1				Cup000026g021947.1	Cup000032g025462.1
Cup000001g000471.A	0	0	0	0	0	0	0	0				Cup000098g039265.1	Cup000172g042723.1	Cup000062g034830.1				Cup000003g003423.1	Cup000172g042723.1
Cup000001g000484.1	0	0	0	0	0	0	0	0				Cup000039g028274.1	Cup000007g007694.1	Cup000032g025427.1				Cup000033g025955.A	Cup000007g007694.1
Cup000001g000485.A	0	0	0	0	0	0	0	0				Cup000169g042653.1	Cup000016g016027.A	Cup000060g034388.1				Cup000048g031801.1	Cup000016g016027.A
Cup000001g000504.A	0	0	0	0	0	0	0	0				Cup000003g002600.1	Cup000015g015206.1	Cup000026g022465.1				Cup000021g019146.1	Cup000015g015206.1
Cup000001g000507.A	0	0	0	0	0	0	0	0				Cup000195g043242.1	Cup000139g041443.1	Cup000042g029680.A				Cup000015g015219.1	Cup000139g041443.1
Cup000001g000511.A	0	0	0	0	0	0	0	0				Cup000150g041945.A	Cup000024g020792.1	Cup000012g012234.1				Cup000026g022290.1	Cup000024g020792.1
Cup000001g000513.A	0	0	0	0	0	0	0	0				Cup000146g041798.1	Cup000968g045439.1	Cup000032g025392.1				Cup000025g021301.A	Cup000968g045439.1
Cup000001g000517.A	0	0	0	0	0	0	0	0				Cup000009g009694.1	Cup000100g039363.A	Cup000007g007676.1				Cup000097g039217.1	Cup000100g039363.A
Cup000001g000535.A	0	0	0	0	0	0	0	0				Cup000004g003882.1	Cup000025g021650.1	Cup000012g012756.1				Cup000095g038972.1	Cup000025g021650.1
Cup000001g000540.A	0	0	0	0	0	0	0	0				Cup000014g014300.1	Cup000051g032490.1	Cup000098g039265.1				Cup000048g031936.1	Cup000051g032490.1
Cup000001g000541.A	0	0	0	0	0	0	0	0				Cup000004g003910.1	Cup000032g025103.A	Cup000020g018796.1				Cup000040g028532.1	Cup000032g025103.A
Cup000001g000544.A	0	0	0	0	0	0	0	0				Cup000002g002164.1	Cup000014g014216.A	Cup000039g028274.1				Cup000011g011767.1	Cup000014g014216.A
Cup000001g000548.A	0	0	0	0	0	0	0	0				Cup000039g028225.1	Cup000122g040722.1	Cup000169g042653.1				Cup000016g015998.1	Cup000122g040722.1
Cup000001g000549.A	0	0	0	0	0	0	0	0				Cup000007g007275.1	Cup000086g037890.1	Cup000003g002600.1				Cup000010g010853.1	Cup000086g037890.1
Cup000001g000557.A	0	0	0	0	0	0	0	0				Cup000170g042683.1	Cup000024g021088.1	Cup000195g043242.1				Cup000035g026539.1	Cup000024g021088.1
Cup000001g000558.1	0	0	0	0	0	0	0	0				Cup000030g024022.1	Cup000032g025220.A	Cup000150g041945.A				Cup000153g042058.1	Cup000032g025220.A
Cup000001g000559.1	0	0	0	0	0	0	0	0				Cup000082g037388.1	Cup000060g034439.A	Cup000146g041798.1				Cup000010g010326.1	Cup000060g034439.A
Cup000001g000564.A	0	0	0	0	0	0	0	0				Cup000057g034074.1	Cup000010g010427.1	Cup000009g009694.1				Cup000003g002794.1	Cup000010g010427.1
Cup000001g000571.A	0	0	0	0	0	0	0	0				Cup000028g023328.1	Cup000067g035919.1	Cup000004g003882.1				Cup000013g013435.A	Cup000067g035919.1
Cup000001g000572.A	0	0	0	0	0	0	0	0				Cup000005g005539.1	Cup000010g011004.1	Cup000014g014300.1				Cup000005g005018.1	Cup000010g011004.1
Cup000001g000573.A	0	0	0	0	0	0	0	0				Cup000148g041881.1	Cup000048g031654.1	Cup000004g003910.1				Cup000042g029453.1	Cup000048g031654.1
Cup000001g000583.1	0	0	0	0	0	0	0	0				Cup000011g012018.1	Cup000048g031653.A	Cup000021g019445.1				Cup000039g028343.1	Cup000048g031653.A
Cup000001g000593.1	0	0	0	0	0	0	0	0				Cup000097g039185.1	Cup000023g020244.1	Cup000002g002164.1				Cup000814g045251.1	Cup000023g020244.1
Cup000001g000605.1	0	0	0	0	0	0	0	0				Cup000001g001071.A	Cup000161g042326.A	Cup000039g028225.1				Cup000186g043063.1	Cup000161g042326.A
Cup000001g000606.A	0	0	0	0	0	0	0	0				Cup000034g026323.1	Cup000001g000692.1	Cup000007g007275.1				Cup000003g003236.1	Cup000001g000692.1
Cup000001g000609.A	0	0	0	0	0	0	0	0				Cup000013g013564.1	Cup000018g017456.1	Cup000170g042683.1				Cup000038g027672.1	Cup000018g017456.1
Cup000001g000610.1	0	0	0	0	0	0	0	0				Cup000013g013299.1	Cup000032g025477.A	Cup000030g024022.1				Cup000008g008591.1	Cup000032g025477.A
Cup000001g000613.A	0	0	0	0	0	0	0	0				Cup000081g037303.1	Cup000003g002638.1	Cup000051g032563.1				Cup000041g029255.1	Cup000003g002638.1
Cup000001g000617.1	0	0	0	0	0	0	0	0				Cup000009g009280.1	Cup000024g021183.A	Cup000009g009204.1				Cup000016g016197.1	Cup000024g021183.A
Cup000001g000619.A	0	0	0	0	0	0	0	0				Cup000008g008557.1	Cup000002g002447.1	Cup000082g037388.1				Cup000003g002909.1	Cup000002g002447.1
Cup000001g000625.A	0	0	0	0	0	0	0	0				Cup000018g017560.1	Cup000012g012763.A	Cup000057g034074.1				Cup000062g034823.1	Cup000012g012763.A
Cup000001g000636.A	0	0	0	0	0	0	0	0				Cup000002g001613.1	Cup000180g042922.1	Cup000020g018584.1				Cup000076g036912.1	Cup000180g042922.1
Cup000001g000639.A	0	0	0	0	0	0	0	0				Cup000026g022267.1	Cup000008g008320.1	Cup000040g028654.A				Cup000024g020751.1	Cup000008g008320.1
Cup000001g000641.A	0	0	0	0	0	0	0	0				Cup000010g010578.1	Cup000019g018103.1	Cup000028g023328.1				Cup000009g009698.A	Cup000019g018103.1
Cup000001g000643.1	0	0	0	0	0	0	0	0				Cup000005g005692.A	Cup000014g014586.1	Cup000140g041465.1				Cup000060g034373.1	Cup000014g014586.1
Cup000001g000662.1	0	0	0	0	0	0	0	0				Cup000003g003385.1	Cup000197g043300.A	Cup000005g005539.1				Cup000086g038043.A	Cup000197g043300.A
Cup000001g000673.A	0	0	0	0	0	0	0	0				Cup000025g021615.1	Cup000029g023659.1	Cup000148g041881.1				Cup000034g026455.1	Cup000029g023659.1
Cup000001g000677.A	0	0	0	0	0	0	0	0				Cup000007g007156.A	Cup003335g046484.1	Cup000011g012018.1				Cup000007g007800.1	Cup003335g046484.1
Cup000001g000682.1	0	0	0	0	0	0	0	0				Cup000026g022247.1	Cup000057g033940.1	Cup000019g018236.1				Cup000009g009311.1	Cup000057g033940.1
Cup000001g000695.A	0	0	0	0	0	0	0	0				Cup000009g009004.1	Cup000005g005675.A	Cup000021g019119.1				Cup000006g006087.1	Cup000005g005675.A
Cup000001g000702.1	0	0	0	0	0	0	0	0				Cup000316g044149.1	Cup000008g008843.1	Cup000005g005268.1				Cup000009g010073.1	Cup000008g008843.1
Cup000001g000704.A	0	0	0	0	0	0	0	0				Cup000009g009073.1	Cup000026g022133.1	Cup000097g039185.1				Cup000146g041833.1	Cup000026g022133.1
Cup000001g000717.A	0	0	0	0	0	0	0	0				Cup000033g025699.1	Cup000038g028143.1	Cup000001g001071.A				Cup000034g026384.1	Cup000038g028143.1
Cup000001g000720.1	0	0	0	0	0	0	0	0				Cup000001g000912.1	Cup000001g001110.1	Cup000034g026323.1				Cup000014g014245.1	Cup000001g001110.1
Cup000001g000723.A	0	0	0	0	0	0	0	0				Cup000010g010312.1	Cup000024g021112.A	Cup000009g009343.1				Cup000043g029888.1	Cup000024g021112.A
Cup000001g000738.A	0	0	0	0	0	0	0	0				Cup000003g002619.1	Cup000065g035474.1	Cup000064g035191.1				Cup000013g013940.1	Cup000065g035474.1
Cup000001g000743.A	0	0	0	0	0	0	0	0				Cup004515g046669.A	Cup000064g035159.1	Cup000003g002716.1				Cup000024g020740.A	Cup000064g035159.1
Cup000001g000751.1	0	0	0	0	0	0	0	0				Cup000013g013118.1	Cup000064g035301.1	Cup000013g013564.1				Cup000492g044732.A	Cup000064g035301.1
Cup000001g000761.A	0	0	0	0	0	0	0	0				Cup000020g018765.A	Cup000008g008054.1	Cup000122g040746.1				Cup000016g015941.1	Cup000008g008054.1
Cup000001g000814.A	0	0	0	0	0	0	0	0				Cup000022g020029.1	Cup000032g025186.1	Cup000012g012690.A				Cup000005g005720.1	Cup000032g025186.1
Cup000001g000815.1	0	0	0	0	0	0	0	0				Cup000024g020725.1	Cup000066g035616.1	Cup000013g013299.1				Cup000010g010379.1	Cup000066g035616.1
Cup000001g000822.1	0	0	0	0	0	0	0	0				Cup000048g031807.1	Cup000025g021477.1	Cup000081g037303.1				Cup000001g001122.1	Cup000025g021477.1
Cup000001g000823.1	0	0	0	0	0	0	0	0				Cup000010g010410.1	Cup000068g036008.1	Cup000009g009280.1				Cup000010g011101.1	Cup000068g036008.1
Cup000001g000830.A	0	0	0	0	0	0	0	0				Cup000136g041365.1	Cup000161g042315.1	Cup000008g008557.1				Cup000105g039868.1	Cup000161g042315.1
Cup000001g000892.1	0	0	0	0	0	0	0	0				Cup000142g041597.1	Cup000029g023641.1	Cup000018g017560.1				Cup000029g023735.1	Cup000029g023641.1
Cup000001g000897.1	0	0	0	0	0	0	0	0				Cup000086g038020.A	Cup000051g032440.1	Cup000002g001613.1				Cup000009g008986.1	Cup000051g032440.1
Cup000001g000968.A	0	0	0	0	0	0	0	0				Cup000004g004588.1	Cup000032g025185.1	Cup000026g022267.1				Cup000014g014203.1	Cup000032g025185.1
Cup000001g000992.A	0	0	0	0	0	0	0	0				Cup000007g007723.A	Cup000043g030088.1	Cup000010g010578.1				Cup000102g039518.1	Cup000043g030088.1
Cup000001g001030.1	0	0	0	0	0	0	0	0				Cup000481g044691.1	Cup000012g012683.1	Cup000005g005692.A				Cup000020g018520.1	Cup000012g012683.1
Cup000001g001067.1	0	0	0	0	0	0	0	0				Cup000033g025934.A	Cup000050g032204.1	Cup000003g003385.1				Cup000011g011524.1	Cup000050g032204.1
Cup000001g001077.1	0	0	0	0	0	0	0	0				Cup000010g010160.1	Cup000002g002574.1	Cup000025g021615.1				Cup000038g027903.1	Cup000002g002574.1
Cup000001g001091.A	0	0	0	0	0	0	0	0				Cup000054g033231.1	Cup000008g008567.A	Cup000007g007156.A				Cup000004g003933.1	Cup000008g008567.A
Cup000001g001118.1	0	0	0	0	0	0	0	0				Cup000042g029639.A	Cup000128g041000.1	Cup000026g022247.1				Cup000031g024950.1	Cup000128g041000.1
Cup000001g001140.A	0	0	0	0	0	0	0	0				Cup000007g007431.A	Cup000196g043275.1	Cup000009g009004.1				Cup000035g026674.1	Cup000196g043275.1
Cup000001g001192.1	0	0	0	0	0	0	0	0				Cup000013g013072.1	Cup000032g025444.1	Cup000316g044149.1				Cup000017g016492.1	Cup000032g025444.1
Cup000001g001206.1	0	0	0	0	0	0	0	0				Cup000042g029737.1	Cup000008g008083.1	Cup000009g009073.1				Cup000033g025719.1	Cup000008g008083.1
Cup000001g001225.A	0	0	0	0	0	0	0	0				Cup000058g034119.1	Cup000058g034088.1	Cup000016g016184.A				Cup000017g016493.1	Cup000058g034088.1
Cup000001g001228.A	0	0	0	0	0	0	0	0				Cup000026g021951.1	Cup000003g003440.1	Cup000046g031254.1				Cup000006g006072.A	Cup000003g003440.1
Cup000001g001234.1	0	0	0	0	0	0	0	0				Cup000030g024442.A	Cup000033g025613.1	Cup000033g025699.1				Cup000044g030247.1	Cup000033g025613.1
Cup000001g001238.1	0	0	0	0	0	0	0	0				Cup000105g039859.1	Cup000175g042814.1	Cup000001g000912.1				Cup000005g005569.1	Cup000175g042814.1
Cup000001g001240.A	0	0	0	0	0	0	0	0				Cup000030g024098.1	Cup000009g009035.1	Cup000010g010312.1				Cup000054g033289.1	Cup000009g009035.1
Cup000001g001246.A	0	0	0	0	0	0	0	0				Cup000072g036404.1	Cup002005g046046.1	Cup000003g002619.1				Cup000049g032103.1	Cup002005g046046.1
Cup000001g001250.A	0	0	0	0	0	0	0	0				Cup000086g037888.1	Cup000066g035844.A	Cup000009g009865.1				Cup000014g014636.1	Cup000066g035844.A
Cup000001g001257.A	0	0	0	0	0	0	0	0				Cup000037g027520.1	Cup000003g002668.A	Cup000026g021947.1				Cup000031g024926.1	Cup000003g002668.A
Cup000001g001262.A	0	0	0	0	0	0	0	0				Cup000132g041152.A	Cup000001g000353.1	Cup000003g003423.1				Cup000015g015041.A	Cup000001g000353.1
Cup000001g001263.A	0	0	0	0	0	0	0	0				Cup000011g011444.1	Cup000011g011989.A	Cup000033g025955.A				Cup000169g042644.A	Cup000011g011989.A
Cup000001g001264.A	0	0	0	0	0	0	0	0				Cup000140g041508.1	Cup000139g041448.1	Cup004515g046669.A				Cup000028g023079.1	Cup000139g041448.1
Cup000001g001265.A	0	0	0	0	0	0	0	0				Cup000033g026013.1	Cup000050g032226.1	Cup000013g013118.1				Cup000017g016377.1	Cup000050g032226.1
Cup000001g001287.A	0	0	0	0	0	0	0	0				Cup000036g027200.1	Cup000003g002661.1	Cup000048g031801.1				Cup000004g004202.1	Cup000003g002661.1
Cup000001g001308.A	0	0	0	0	0	0	0	0				Cup000905g045355.1	Cup000018g017633.1	Cup000020g018765.A				Cup000016g015467.A	Cup000018g017633.1
Cup000001g001311.1	0	0	0	0	0	0	0	0				Cup000014g014348.1	Cup000022g020137.A	Cup000022g020029.1				Cup000045g030734.A	Cup000022g020137.A
Cup000001g001325.1	0	0	0	0	0	0	0	0				Cup000069g036069.1	Cup000007g007051.1	Cup000024g020725.1				Cup000017g016640.1	Cup000007g007051.1
Cup000001g001330.A	0	0	0	0	0	0	0	0				Cup000007g007819.1	Cup000060g034319.1	Cup000048g031807.1				Cup000018g017724.A	Cup000060g034319.1
Cup000001g001333.A	0	0	0	0	0	0	0	0				Cup000090g038295.A	Cup000008g008672.1	Cup000010g010410.1				Cup000027g022727.1	Cup000008g008672.1
Cup000001g001335.1	0	0	0	0	0	0	0	0				Cup000013g013632.1	Cup000083g037532.1	Cup000136g041365.1				Cup000056g033768.1	Cup000083g037532.1
Cup000001g001341.A	0	0	0	0	0	0	0	0				Cup000042g029771.A	Cup000012g012382.1	Cup000142g041597.1				Cup000006g006804.1	Cup000012g012382.1
Cup000001g001348.A	0	0	0	0	0	0	0	0				Cup000038g027964.1	Cup000005g005224.1	Cup000086g038020.A				Cup000003g003374.1	Cup000005g005224.1
Cup000001g001349.A	0	0	0	0	0	0	0	0				Cup000018g017221.1	Cup000008g008093.1	Cup000004g004588.1				Cup000003g002945.1	Cup000008g008093.1
Cup000001g001351.1	0	0	0	0	0	0	0	0				Cup000032g025373.A	Cup000014g014781.1	Cup000021g019146.1				Cup000117g040539.1	Cup000014g014781.1
Cup000001g001352.A	0	0	0	0	0	0	0	0				Cup000020g018591.1	Cup000168g042531.1	Cup000007g007723.A				Cup000005g005632.1	Cup000168g042531.1
Cup000001g001355.A	0	0	0	0	0	0	0	0				Cup000086g037989.1	Cup000101g039510.A	Cup000481g044691.1				Cup000005g005237.1	Cup000101g039510.A
Cup000001g001365.A	0	0	0	0	0	0	0	0				Cup000159g042266.1	Cup000028g022951.1	Cup000015g015219.1				Cup000052g032752.1	Cup000028g022951.1
Cup000001g001368.A	0	0	0	0	0	0	0	0				Cup000077g036984.1	Cup002868g046386.1	Cup000026g022290.1				Cup000197g043283.1	Cup002868g046386.1
Cup000001g001370.1	0	0	0	0	0	0	0	0				Cup000014g014712.1	Cup000001g000439.1	Cup000033g025934.A				Cup000011g011959.1	Cup000001g000439.1
Cup000001g001371.A	0	0	0	0	0	0	0	0				Cup000045g030849.1	Cup000007g008036.A	Cup000010g010160.1				Cup000025g021638.1	Cup000007g008036.A
Cup000001g001375.A	0	0	0	0	0	0	0	0				Cup000083g037523.1	Cup000046g031258.A	Cup000054g033231.1				Cup000004g004613.1	Cup000046g031258.A
Cup000001g001381.A	0	0	0	0	0	0	0	0				Cup000560g044862.1	Cup000034g026230.1	Cup000042g029639.A				Cup000003g003410.A	Cup000034g026230.1
Cup000001g001385.A	0	0	0	0	0	0	0	0				Cup000055g033477.1	Cup000031g024611.1	Cup000007g007431.A				Cup000045g030624.1	Cup000031g024611.1
Cup000001g001388.1	0	0	0	0	0	0	0	0				Cup000169g042608.1	Cup000015g015069.1	Cup000025g021301.A				Cup000034g026387.1	Cup000015g015069.1
Cup000001g001403.A	0	0	0	0	0	0	0	0				Cup000019g017890.1	Cup000035g026788.1	Cup000013g013072.1				Cup000003g002930.1	Cup000035g026788.1
Cup000001g001405.A	0	0	0	0	0	0	0	0				Cup000039g028390.1	Cup000009g009903.1	Cup000042g029737.1				Cup000498g044757.A	Cup000009g009903.1
Cup000001g001429.1	0	0	0	0	0	0	0	0				Cup000024g020999.1	Cup000001g000174.1	Cup000058g034119.1				Cup000004g004881.1	Cup000001g000174.1
Cup000001g001442.A	0	0	0	0	0	0	0	0				Cup000001g000874.1	Cup000044g030147.1	Cup000026g021951.1				Cup000084g037745.A	Cup000044g030147.1
Cup000001g001451.A	0	0	0	0	0	0	0	0				Cup000039g028425.1	Cup000149g041920.1	Cup000097g039217.1				Cup000950g045413.A	Cup000149g041920.1
Cup000001g001452.A	0	0	0	0	0	0	0	0				Cup000091g038427.1	Cup000129g041012.A	Cup000030g024442.A				Cup000005g005011.1	Cup000129g041012.A
Cup000001g001460.A	0	0	0	0	0	0	0	0				Cup000037g027603.1	Cup000041g029125.A	Cup000095g038972.1				Cup000055g033463.1	Cup000041g029125.A
Cup000001g001468.1	0	0	0	0	0	0	0	0				Cup000010g010795.1	Cup000052g032908.1	Cup000105g039859.1				Cup000013g013181.1	Cup000052g032908.1
Cup000001g001472.A	0	0	0	0	0	0	0	0				Cup000004g004737.1	Cup000048g031837.1	Cup000030g024098.1				Cup000265g043898.1	Cup000048g031837.1
Cup000002g001476.A	0	0	0	0	0	0	0	0				Cup000010g010963.1	Cup000002g002549.1	Cup000048g031936.1				Cup000041g029228.1	Cup000002g002549.1
Cup000002g001481.1	0	0	0	0	0	0	0	0				Cup000009g009906.1	Cup000001g000351.1	Cup000072g036404.1				Cup000021g019498.1	Cup000001g000351.1
Cup000002g001487.A	0	0	0	0	0	0	0	0				Cup000010g010333.1	Cup000014g014553.1	Cup000086g037888.1				Cup000042g029561.1	Cup000014g014553.1
Cup000002g001504.1	0	0	0	0	0	0	0	0				Cup000019g018177.1	Cup000122g040735.1	Cup000040g028532.1				Cup000009g009135.1	Cup000122g040735.1
Cup000002g001568.A	0	0	0	0	0	0	0	0				Cup000066g035593.1	Cup000042g029722.1	Cup000037g027520.1				Cup000500g044763.1	Cup000042g029722.1
Cup000002g001569.1	0	0	0	0	0	0	0	0				Cup000053g033119.1	Cup000206g043377.1	Cup000132g041152.A				Cup000013g013000.1	Cup000206g043377.1
Cup000002g001596.1	0	0	0	0	0	0	0	0				Cup000033g026003.1	Cup000005g004899.1	Cup000011g011767.1				Cup000009g009265.1	Cup000005g004899.1
Cup000002g001621.A	0	0	0	0	0	0	0	0				Cup000032g025137.1	Cup000030g024372.1	Cup000016g015998.1				Cup000018g017504.1	Cup000030g024372.1
Cup000002g001658.1	0	0	0	0	0	0	0	0				Cup000003g003390.1	Cup000080g037214.1	Cup000010g010853.1				Cup000063g035109.1	Cup000080g037214.1
Cup000002g001666.A	0	0	0	0	0	0	0	0				Cup000004g003735.1	Cup000001g001120.1	Cup000011g011444.1				Cup000001g001092.1	Cup000001g001120.1
Cup000002g001695.1	0	0	0	0	0	0	0	0				Cup000834g045276.1	Cup000067g035944.1	Cup000035g026539.1				Cup000009g009935.1	Cup000067g035944.1
Cup000002g001706.1	0	0	0	0	0	0	0	0				Cup000014g014224.1	Cup000007g007317.1	Cup000153g042058.1				Cup000030g024167.A	Cup000007g007317.1
Cup000002g001711.A	0	0	0	0	0	0	0	0				Cup000003g003223.1	Cup000032g025114.1	Cup000140g041508.1				Cup000011g011830.A	Cup000032g025114.1
Cup000002g001771.A	0	0	0	0	0	0	0	0				Cup000060g034326.A	Cup000029g023887.A	Cup000010g010326.1				Cup000033g025981.A	Cup000029g023887.A
Cup000002g001780.A	0	0	0	0	0	0	0	0				Cup000053g033010.A	Cup000003g002679.1	Cup000033g026013.1				Cup000035g026683.1	Cup000003g002679.1
Cup000002g001793.1	0	0	0	0	0	0	0	0				Cup000039g028439.1	Cup000008g008363.1	Cup000036g027200.1				Cup000056g033858.1	Cup000008g008363.1
Cup000002g001796.A	0	0	0	0	0	0	0	0				Cup000056g033834.1	Cup000770g045178.1	Cup000905g045355.1				Cup000093g038725.1	Cup000770g045178.1
Cup000002g001799.A	0	0	0	0	0	0	0	0				Cup000004g004291.1	Cup000032g025091.1	Cup000014g014348.1				Cup000022g020073.A	Cup000032g025091.1
Cup000002g001810.A	0	0	0	0	0	0	0	0				Cup000095g038920.1	Cup000037g027533.1	Cup000069g036069.1				Cup000054g033394.1	Cup000037g027533.1
Cup000002g001817.A	0	0	0	0	0	0	0	0				Cup000010g010987.1	Cup000026g022257.1	Cup000003g002794.1				Cup000012g012841.1	Cup000026g022257.1
Cup000002g001819.A	0	0	0	0	0	0	0	0				Cup000001g000334.1	Cup000017g016415.1	Cup000007g007819.1				Cup000038g028030.1	Cup000017g016415.1
Cup000002g001823.A	0	0	0	0	0	0	0	0				Cup000006g006360.1	Cup000014g014658.1	Cup000090g038295.A				Cup000009g009699.1	Cup000014g014658.1
Cup000002g001833.A	0	0	0	0	0	0	0	0				Cup000086g038001.1	Cup000011g011780.A	Cup000013g013435.A				Cup000140g041499.1	Cup000011g011780.A
Cup000002g001835.A	0	0	0	0	0	0	0	0				Cup000054g033359.1	Cup000016g015971.1	Cup000013g013632.1				Cup000019g018089.1	Cup000016g015971.1
Cup000002g001844.A	0	0	0	0	0	0	0	0				Cup000001g000935.1	Cup000030g024451.1	Cup000005g005018.1				Cup000033g025724.1	Cup000030g024451.1
Cup000002g001847.A	0	0	0	0	0	0	0	0				Cup000065g035314.1	Cup000006g006594.1	Cup000042g029771.A				Cup000034g026410.1	Cup000006g006594.1
Cup000002g001851.A	0	0	0	0	0	0	0	0				Cup000003g003268.1	Cup000027g022760.1	Cup000042g029453.1				Cup000012g012222.A	Cup000027g022760.1
Cup000002g001852.1	0	0	0	0	0	0	0	0				Cup000013g013537.1	Cup000050g032205.1	Cup000038g027964.1				Cup000091g038324.1	Cup000050g032205.1
Cup000002g001865.1	0	0	0	0	0	0	0	0				Cup000020g018762.1	Cup000011g011417.1	Cup000018g017221.1				Cup000033g025906.1	Cup000011g011417.1
Cup000002g001868.A	0	0	0	0	0	0	0	0				Cup000056g033822.1	Cup000022g019617.1	Cup000032g025373.A				Cup000051g032416.A	Cup000022g019617.1
Cup000002g001871.A	0	0	0	0	0	0	0	0				Cup000007g007842.1	Cup000005g005232.1	Cup000039g028343.1				Cup000352g044299.1	Cup000005g005232.1
Cup000002g001876.A	0	0	0	0	0	0	0	0				Cup000085g037847.1	Cup004256g046631.A	Cup000814g045251.1				Cup009126g047027.A	Cup004256g046631.A
Cup000002g001878.1	0	0	0	0	0	0	0	0				Cup000005g005477.1	Cup000412g044482.1	Cup000020g018591.1				Cup001233g045637.1	Cup000412g044482.1
Cup000002g001880.A	0	0	0	0	0	0	0	0				Cup000001g001172.1	Cup000034g026413.1	Cup000086g037989.1				Cup000006g006304.A	Cup000034g026413.1
Cup000002g001886.1	0	0	0	0	0	0	0	0				Cup000018g017522.1	Cup000032g025189.1	Cup000159g042266.1				Cup000087g038094.1	Cup000032g025189.1
Cup000002g001891.A	0	0	0	0	0	0	0	0				Cup000051g032346.1	Cup000003g002611.1	Cup000077g036984.1				Cup000122g040725.1	Cup000003g002611.1
Cup000002g001901.A	0	0	0	0	0	0	0	0				Cup000096g039066.1	Cup000025g021753.1	Cup000014g014712.1				Cup000028g023240.1	Cup000025g021753.1
Cup000002g001904.1	0	0	0	0	0	0	0	0				Cup000024g021127.1	Cup000019g018219.1	Cup000045g030849.1				Cup000016g015609.1	Cup000019g018219.1
Cup000002g001908.A	0	0	0	0	0	0	0	0				Cup000008g008584.1	Cup000033g025973.1	Cup000083g037523.1				Cup000070g036254.A	Cup000033g025973.1
Cup000002g001910.A	0	0	0	0	0	0	0	0				Cup000104g039723.A	Cup000001g001046.1	Cup000186g043063.1				Cup000015g015229.1	Cup000001g001046.1
Cup000002g001912.A	0	0	0	0	0	0	0	0				Cup000003g002916.1	Cup000018g017429.1	Cup000560g044862.1				Cup000013g013316.1	Cup000018g017429.1
Cup000002g001914.A	0	0	0	0	0	0	0	0				Cup000022g020064.1	Cup000003g002615.A	Cup000055g033477.1				Cup000043g030110.A	Cup000003g002615.A
Cup000002g001919.1	0	0	0	0	0	0	0	0				Cup000016g015628.1	Cup000030g023952.1	Cup000169g042608.1				Cup000003g003178.1	Cup000030g023952.1
Cup000002g001920.A	0	0	0	0	0	0	0	0				Cup000032g025129.1	Cup000018g017468.A	Cup000019g017890.1				Cup000089g038239.A	Cup000018g017468.A
Cup000002g001923.A	0	0	0	0	0	0	0	0				Cup000010g010687.A	Cup000016g015406.1	Cup000003g003236.1				Cup000022g019808.1	Cup000016g015406.1
Cup000002g001926.A	0	0	0	0	0	0	0	0				Cup000103g039599.1	Cup000001g000096.1	Cup000039g028390.1				Cup000007g007831.1	Cup000001g000096.1
Cup000002g001929.A	0	0	0	0	0	0	0	0				Cup000003g002816.1	Cup000020g018566.1	Cup000038g027672.1				Cup000083g037595.1	Cup000020g018566.1
Cup000002g001931.A	0	0	0	0	0	0	0	0				Cup000024g021121.1	Cup000024g020813.1	Cup000008g008591.1				Cup000007g007664.1	Cup000024g020813.1
Cup000002g001934.A	0	0	0	0	0	0	0	0				Cup000020g018860.1	Cup000066g035627.1	Cup000024g020999.1				Cup000035g026957.1	Cup000066g035627.1
Cup000002g001935.1	0	0	0	0	0	0	0	0				Cup000008g008451.1	Cup000012g012425.1	Cup000001g000874.1				Cup000015g014969.1	Cup000012g012425.1
Cup000002g001938.A	0	0	0	0	0	0	0	0				Cup000002g001604.1	Cup000003g003177.1	Cup000039g028425.1				Cup000052g032921.1	Cup000003g003177.1
Cup000002g001948.1	0	0	0	0	0	0	0	0				Cup000091g038349.1	Cup000013g013655.A	Cup000091g038427.1				Cup000713g045109.1	Cup000013g013655.A
Cup000002g001961.A	0	0	0	0	0	0	0	0				Cup000180g042936.1	Cup000077g036946.1	Cup000041g029255.1				Cup000024g020742.1	Cup000077g036946.1
Cup000002g001964.A	0	0	0	0	0	0	0	0				Cup000018g017614.A	Cup000074g036641.1	Cup000016g016197.1				Cup000058g034121.1	Cup000074g036641.1
Cup000002g001974.1	0	0	0	0	0	0	0	0				Cup000011g011941.1	Cup000026g022297.A	Cup000003g002909.1				Cup000001g000955.A	Cup000026g022297.A
Cup000002g001986.A	0	0	0	0	0	0	0	0				Cup000069g036071.A	Cup006080g046832.1	Cup000062g034823.1				Cup000030g024042.1	Cup006080g046832.1
Cup000002g001994.1	0	0	0	0	0	0	0	0				Cup000026g022428.1	Cup000011g011226.1	Cup000037g027603.1				Cup000007g007338.1	Cup000011g011226.1
Cup000002g001997.1	0	0	0	0	0	0	0	0				Cup000012g012644.A	Cup000046g031023.1	Cup000010g010795.1				Cup000069g036172.A	Cup000046g031023.1
Cup000002g002012.A	0	0	0	0	0	0	0	0				Cup000036g027130.1	Cup000049g032095.1	Cup000004g004737.1				Cup000006g006080.1	Cup000049g032095.1
Cup000002g002025.A	0	0	0	0	0	0	0	0				Cup000656g045020.1	Cup000162g042393.1	Cup000010g010963.1				Cup000006g006536.1	Cup000162g042393.1
Cup000002g002032.1	0	0	0	0	0	0	0	0				Cup000075g036841.1	Cup000032g025347.1	Cup000076g036912.1				Cup000049g032128.1	Cup000032g025347.1
Cup000002g002038.A	0	0	0	0	0	0	0	0				Cup000040g028582.1	Cup000013g013657.1	Cup000009g009906.1				Cup000038g027710.1	Cup000013g013657.1
Cup000002g002051.1	0	0	0	0	0	0	0	0				Cup000168g042582.1	Cup000046g031099.A	Cup000010g010333.1				Cup000020g018984.A	Cup000046g031099.A
Cup000002g002054.A	0	0	0	0	0	0	0	0				Cup000001g000522.1	Cup000013g013158.1	Cup000019g018177.1				Cup000011g011682.A	Cup000013g013158.1
Cup000002g002056.A	0	0	0	0	0	0	0	0				Cup000022g020081.1	Cup000025g021741.1	Cup000066g035593.1				Cup000016g015748.1	Cup000025g021741.1
Cup000002g002057.A	0	0	0	0	0	0	0	0				Cup000025g021438.A	Cup000019g018137.1	Cup000053g033119.1				Cup000011g012008.1	Cup000019g018137.1
Cup000002g002078.1	0	0	0	0	0	0	0	0				Cup000074g036654.1	Cup000008g008628.1	Cup000033g026003.1				Cup000551g044850.1	Cup000008g008628.1
Cup000002g002104.1	0	0	0	0	0	0	0	0				Cup000109g040217.1	Cup000008g008535.1	Cup000032g025137.1				Cup000001g000148.1	Cup000008g008535.1
Cup000002g002123.1	0	0	0	0	0	0	0	0				Cup000001g000318.A	Cup000024g021086.1	Cup000003g003390.1				Cup000019g017935.1	Cup000024g021086.1
Cup000002g002143.1	0	0	0	0	0	0	0	0				Cup000007g007108.1	Cup000024g020752.1	Cup000004g003735.1				Cup000071g036306.A	Cup000024g020752.1
Cup000002g002149.A	0	0	0	0	0	0	0	0				Cup000010g010301.1	Cup000032g025331.1	Cup000834g045276.1				Cup000015g015022.1	Cup000032g025331.1
Cup000002g002150.1	0	0	0	0	0	0	0	0				Cup000034g026362.1	Cup000032g025148.1	Cup000014g014224.1				Cup000033g025760.A	Cup000032g025148.1
Cup000002g002154.1	0	0	0	0	0	0	0	0				Cup000023g020265.1	Cup000025g021648.1	Cup000024g020751.1				Cup000004g004599.1	Cup000025g021648.1
Cup000002g002169.A	0	0	0	0	0	0	0	0				Cup000011g011714.1	Cup000072g036466.1	Cup000003g003223.1				Cup000012g012834.1	Cup000072g036466.1
Cup000002g002174.A	0	0	0	0	0	0	0	0				Cup000003g002666.1	Cup000005g005497.1	Cup000060g034326.A				Cup000034g026182.1	Cup000005g005497.1
Cup000002g002220.1	0	0	0	0	0	0	0	0				Cup000010g010398.A	Cup000056g033675.A	Cup000053g033010.A				Cup000030g024255.1	Cup000056g033675.A
Cup000002g002221.1	0	0	0	0	0	0	0	0				Cup000043g029864.1	Cup000094g038832.1	Cup000039g028439.1				Cup000097g039125.1	Cup000094g038832.1
Cup000002g002223.A	0	0	0	0	0	0	0	0				Cup000012g012977.A	Cup000001g000443.1	Cup000009g009698.A				Cup000536g044819.1	Cup000001g000443.1
Cup000002g002237.A	0	0	0	0	0	0	0	0				Cup000872g045324.1	Cup000005g005335.A	Cup000060g034373.1				Cup000055g033604.1	Cup000005g005335.A
Cup000002g002251.A	0	0	0	0	0	0	0	0				Cup002690g046316.A	Cup000022g019641.1	Cup000056g033834.1				Cup000009g009852.1	Cup000022g019641.1
Cup000002g002271.1	0	0	0	0	0	0	0	0				Cup000052g032750.A	Cup000020g018893.1	Cup000004g004291.1				Cup000008g008662.1	Cup000020g018893.1
Cup000002g002298.1	0	0	0	0	0	0	0	0				Cup000005g005556.1	Cup000001g000697.1	Cup000086g038043.A				Cup000056g033669.1	Cup000001g000697.1
Cup000002g002299.A	0	0	0	0	0	0	0	0				Cup000044g030504.1	Cup000051g032394.1	Cup000034g026455.1				Cup000013g013643.A	Cup000051g032394.1
Cup000002g002329.1	0	0	0	0	0	0	0	0				Cup000017g016856.1	Cup000015g014983.1	Cup000095g038920.1				Cup000081g037360.A	Cup000015g014983.1
Cup000002g002341.1	0	0	0	0	0	0	0	0				Cup000066g035814.1	Cup000094g038817.A	Cup000007g007800.1				Cup000009g009368.A	Cup000094g038817.A
Cup000002g002345.A	0	0	0	0	0	0	0	0				Cup000040g028583.1	Cup000038g027942.1	Cup000009g009311.1				Cup000009g009961.1	Cup000038g027942.1
Cup000002g002349.A	0	0	0	0	0	0	0	0				Cup000051g032371.1	Cup000014g014526.1	Cup000010g010987.1				Cup000010g010555.A	Cup000014g014526.1
Cup000002g002355.A	0	0	0	0	0	0	0	0				Cup000129g041004.1	Cup000032g025306.A	Cup000001g000334.1				Cup000024g021102.1	Cup000032g025306.A
Cup000002g002358.1	0	0	0	0	0	0	0	0				Cup000153g042096.1	Cup000051g032634.1	Cup000006g006360.1				Cup000009g009484.A	Cup000051g032634.1
Cup000002g002366.A	0	0	0	0	0	0	0	0				Cup000006g006573.1	Cup000023g020317.1	Cup000086g038001.1				Cup000004g004663.A	Cup000023g020317.1
Cup000002g002377.A	0	0	0	0	0	0	0	0				Cup000007g007043.1	Cup000073g036536.A	Cup000054g033359.1				Cup000023g020326.1	Cup000073g036536.A
Cup000002g002383.1	0	0	0	0	0	0	0	0				Cup000051g032625.1	Cup010685g047102.A	Cup000001g000935.1				Cup000013g013039.1	Cup010685g047102.A
Cup000002g002384.A	0	0	0	0	0	0	0	0				Cup000490g044730.1	Cup000092g038614.1	Cup000065g035314.1				Cup000004g003774.1	Cup000092g038614.1
Cup000002g002386.1	0	0	0	0	0	0	0	0				Cup000053g033159.A	Cup000018g017118.1	Cup000006g006087.1				Cup000142g041582.1	Cup000018g017118.1
Cup000002g002389.A	0	0	0	0	0	0	0	0				Cup000067g035921.1	Cup000007g007752.1	Cup000003g003268.1				Cup000020g018459.1	Cup000007g007752.1
Cup000002g002392.A	0	0	0	0	0	0	0	0				Cup000005g005599.A	Cup000032g025147.1	Cup000013g013537.1				Cup000013g013622.1	Cup000032g025147.1
Cup000002g002394.A	0	0	0	0	0	0	0	0				Cup000020g018738.1	Cup000011g011231.1	Cup000020g018762.1				Cup000004g003668.1	Cup000011g011231.1
Cup000002g002396.A	0	0	0	0	0	0	0	0				Cup000018g017470.1	Cup000002g002064.1	Cup000056g033822.1				Cup000038g028065.1	Cup000002g002064.1
Cup000002g002400.A	0	0	0	0	0	0	0	0				Cup000032g025335.1	Cup000094g038883.A	Cup000007g007842.1				Cup000025g021874.1	Cup000094g038883.A
Cup000002g002401.1	0	0	0	0	0	0	0	0				Cup000222g043573.1	Cup000067g035880.1	Cup000009g010073.1				Cup000041g029121.1	Cup000067g035880.1
Cup000002g002424.A	0	0	0	0	0	0	0	0				Cup000057g033949.1	Cup000051g032616.1	Cup000085g037847.1				Cup000001g001267.A	Cup000051g032616.1
Cup000002g002427.A	0	0	0	0	0	0	0	0				Cup000049g032090.1	Cup001052g045492.1	Cup000146g041833.1				Cup000008g008614.1	Cup001052g045492.1
Cup000002g002433.A	0	0	0	0	0	0	0	0				Cup000013g013771.1	Cup002347g046175.1	Cup000005g005477.1				Cup000014g014306.1	Cup002347g046175.1
Cup000002g002434.A	0	0	0	0	0	0	0	0				Cup000015g015384.A	Cup000003g002598.1	Cup000001g001172.1				Cup000021g019231.1	Cup000003g002598.1
Cup000002g002435.1	0	0	0	0	0	0	0	0				Cup000131g041135.1	Cup000044g030243.1	Cup000034g026384.1				Cup000015g014995.1	Cup000044g030243.1
Cup000002g002438.1	0	0	0	0	0	0	0	0				Cup000046g031336.1	Cup000070g036264.1	Cup000018g017522.1				Cup000027g022556.1	Cup000070g036264.1
Cup000002g002442.A	0	0	0	0	0	0	0	0				Cup000073g036540.1	Cup000083g037426.1	Cup000051g032346.1				Cup000001g000960.1	Cup000083g037426.1
Cup000002g002446.1	0	0	0	0	0	0	0	0				Cup000008g008576.1	Cup000022g020110.1	Cup000014g014245.1				Cup000016g015594.1	Cup000022g020110.1
Cup000002g002454.A	0	0	0	0	0	0	0	0				Cup000383g044405.A	Cup000010g010794.1	Cup000096g039066.1				Cup000083g037437.1	Cup000010g010794.1
Cup000002g002462.A	0	0	0	0	0	0	0	0				Cup000006g006876.A	Cup000046g031056.A	Cup000024g021127.1				Cup000035g026675.1	Cup000046g031056.A
Cup000002g002467.1	0	0	0	0	0	0	0	0				Cup000107g040018.1	Cup000035g026834.1	Cup000008g008584.1				Cup000007g007656.1	Cup000035g026834.1
Cup000002g002471.A	0	0	0	0	0	0	0	0				Cup000068g035978.1	Cup000010g010431.A	Cup000043g029888.1				Cup001018g045469.1	Cup000010g010431.A
Cup000002g002478.1	0	0	0	0	0	0	0	0				Cup000056g033824.1	Cup000008g008625.1	Cup000013g013940.1				Cup000064g035269.1	Cup000008g008625.1
Cup000002g002479.1	0	0	0	0	0	0	0	0				Cup000035g026980.A	Cup000247g043748.1	Cup000104g039723.A				Cup000005g005573.1	Cup000247g043748.1
Cup000002g002482.A	0	0	0	0	0	0	0	0				Cup000003g002686.1	Cup000014g014121.1	Cup000003g002916.1				Cup000052g032987.A	Cup000014g014121.1
Cup000002g002486.1	0	0	0	0	0	0	0	0				Cup000032g025359.1	Cup000017g016838.1	Cup000022g020064.1				Cup000175g042823.1	Cup000017g016838.1
Cup000002g002490.1	0	0	0	0	0	0	0	0				Cup000024g020713.A	Cup000005g005504.1	Cup000016g015628.1				Cup000018g017203.1	Cup000005g005504.1
Cup000002g002497.A	0	0	0	0	0	0	0	0				Cup000004g004257.1	Cup000028g023207.1	Cup000032g025129.1				Cup000077g037046.1	Cup000028g023207.1
Cup000002g002503.A	0	0	0	0	0	0	0	0				Cup000026g022221.1	Cup000071g036358.1	Cup000010g010687.A				Cup000108g040188.1	Cup000071g036358.1
Cup000002g002512.A	0	0	0	0	0	0	0	0				Cup000114g040370.1	Cup000009g009119.A	Cup000103g039599.1				Cup000041g029231.1	Cup000009g009119.A
Cup000002g002517.1	0	0	0	0	0	0	0	0				Cup000071g036312.1	Cup000003g003078.A	Cup000003g002816.1				Cup000196g043271.1	Cup000003g003078.A
Cup000002g002518.A	0	0	0	0	0	0	0	0				Cup000003g003165.1	Cup000209g043453.1	Cup000024g020740.A				Cup000014g014629.1	Cup000209g043453.1
Cup000002g002522.A	0	0	0	0	0	0	0	0				Cup000041g029268.1	Cup000003g003204.1	Cup000024g021121.1				Cup000025g021621.1	Cup000003g003204.1
Cup000002g002525.A	0	0	0	0	0	0	0	0				Cup000026g022268.1	Cup000018g017052.1	Cup000492g044732.A				Cup000028g022899.1	Cup000018g017052.1
Cup000002g002540.A	0	0	0	0	0	0	0	0				Cup000083g037560.1	Cup000208g043439.1	Cup000020g018860.1				Cup000063g035080.1	Cup000208g043439.1
Cup000002g002548.1	0	0	0	0	0	0	0	0				Cup000003g003131.1	Cup000006g006902.A	Cup000016g015941.1				Cup000024g020685.1	Cup000006g006902.A
Cup000002g002553.1	0	0	0	0	0	0	0	0				Cup000039g028356.1	Cup000008g008547.1	Cup000005g005720.1				Cup000040g028658.A	Cup000008g008547.1
Cup000002g002557.A	0	0	0	0	0	0	0	0				Cup000005g004886.1	Cup000046g031038.1	Cup000008g008451.1				Cup000022g019802.1	Cup000046g031038.1
Cup000002g002560.A	0	0	0	0	0	0	0	0				Cup000013g013303.1	Cup000022g020057.1	Cup000002g001604.1				Cup000008g008292.1	Cup000022g020057.1
Cup000002g002570.A	0	0	0	0	0	0	0	0				Cup000046g031203.1	Cup000074g036760.1	Cup000091g038349.1				Cup000020g018835.1	Cup000074g036760.1
Cup000002g002577.A	0	0	0	0	0	0	0	0				Cup000001g000913.1	Cup000018g017204.A	Cup000180g042936.1				Cup000017g016300.1	Cup000018g017204.A
Cup000002g002578.1	0	0	0	0	0	0	0	0				Cup000020g018492.1	Cup000003g003420.1	Cup000010g010379.1				Cup000091g038331.1	Cup000003g003420.1
Cup000002g002579.A	0	0	0	0	0	0	0	0				Cup000130g041091.1	Cup000019g017778.1	Cup000018g017614.A				Cup000003g003045.A	Cup000019g017778.1
Cup000002g002581.1	0	0	0	0	0	0	0	0				Cup000108g040148.1	Cup000017g016818.1	Cup000011g011941.1				Cup000062g034963.1	Cup000017g016818.1
Cup000003g002608.1	0	0	0	0	0	0	0	0				Cup000026g021940.1	Cup000008g008411.1	Cup000069g036071.A				Cup000018g017461.1	Cup000008g008411.1
Cup000003g002623.A	0	0	0	0	0	0	0	0				Cup000041g029278.A	Cup000016g015759.1	Cup000001g001122.1				Cup000042g029489.1	Cup000016g015759.1
Cup000003g002626.A	0	0	0	0	0	0	0	0				Cup000119g040576.1	Cup000005g005582.1	Cup000026g022428.1				Cup000045g030860.1	Cup000005g005582.1
Cup000003g002629.A	0	0	0	0	0	0	0	0				Cup000003g003210.1	Cup000011g011913.1	Cup000012g012644.A				Cup000009g009188.1	Cup000011g011913.1
Cup000003g002655.1	0	0	0	0	0	0	0	0				Cup000027g022723.1	Cup000009g009333.1	Cup000036g027130.1				Cup000064g035272.1	Cup000009g009333.1
Cup000003g002706.A	0	0	0	0	0	0	0	0				Cup000003g003246.1	Cup000006g006651.1	Cup000656g045020.1				Cup000017g016675.1	Cup000006g006651.1
Cup000003g002713.1	0	0	0	0	0	0	0	0				Cup000007g007088.1	Cup000001g001193.1	Cup000075g036841.1				Cup000002g002002.1	Cup000001g001193.1
Cup000003g002747.A	0	0	0	0	0	0	0	0				Cup000039g028492.1	Cup000066g035743.1	Cup000040g028582.1				Cup000003g002694.1	Cup000066g035743.1
Cup000003g002769.1	0	0	0	0	0	0	0	0				Cup000012g012656.1	Cup000041g029415.A	Cup000168g042582.1				Cup000003g002946.1	Cup000041g029415.A
Cup000003g002786.A	0	0	0	0	0	0	0	0				Cup000026g022258.1	Cup000030g023978.1	Cup000001g000522.1				Cup000009g009565.1	Cup000030g023978.1
Cup000003g002795.A	0	0	0	0	0	0	0	0				Cup000021g019423.1	Cup000919g045377.1	Cup000022g020081.1				Cup000018g017062.1	Cup000919g045377.1
Cup000003g002819.1	0	0	0	0	0	0	0	0				Cup000020g018588.1	Cup000073g036548.1	Cup000025g021438.A				Cup000097g039139.A	Cup000073g036548.1
Cup000003g002830.A	0	0	0	0	0	0	0	0				Cup000066g035735.1	Cup000013g013280.1	Cup000074g036654.1				Cup000002g001583.1	Cup000013g013280.1
Cup000003g002839.1	0	0	0	0	0	0	0	0				Cup000030g024102.1	Cup000032g025450.1	Cup000010g011101.1				Cup000016g015505.1	Cup000032g025450.1
Cup000003g002846.A	0	0	0	0	0	0	0	0				Cup000017g016489.A	Cup000073g036549.1	Cup000105g039868.1				Cup000047g031444.A	Cup000073g036549.1
Cup000003g002857.1	0	0	0	0	0	0	0	0				Cup000214g043520.1	Cup000017g016343.1	Cup000109g040217.1				Cup000063g035108.1	Cup000017g016343.1
Cup000003g002863.A	0	0	0	0	0	0	0	0				Cup000029g023541.1	Cup000132g041180.1	Cup000001g000318.A				Cup000202g043334.1	Cup000132g041180.1
Cup000003g002869.A	0	0	0	0	0	0	0	0				Cup000001g000843.1	Cup000038g027922.1	Cup000007g007108.1				Cup000026g021924.1	Cup000038g027922.1
Cup000003g002956.A	0	0	0	0	0	0	0	0				Cup000025g021796.1	Cup000051g032617.1	Cup000010g010301.1				Cup000008g008418.A	Cup000051g032617.1
Cup000003g002959.A	0	0	0	0	0	0	0	0				Cup000006g006332.1	Cup000016g015401.1	Cup000034g026362.1				Cup000029g023396.1	Cup000016g015401.1
Cup000003g002961.A	0	0	0	0	0	0	0	0				Cup000013g013724.1	Cup000111g040256.1	Cup000029g023735.1				Cup000013g013563.1	Cup000111g040256.1
Cup000003g002962.A	0	0	0	0	0	0	0	0				Cup000014g014210.1	Cup000050g032217.A	Cup000009g008986.1				Cup000020g019062.A	Cup000050g032217.A
Cup000003g002966.A	0	0	0	0	0	0	0	0				Cup000006g006064.1	Cup000024g021210.1	Cup000023g020265.1				Cup000031g024806.1	Cup000024g021210.1
Cup000003g002969.A	0	0	0	0	0	0	0	0				Cup000010g010409.1	Cup000051g032465.1	Cup000011g011714.1				Cup000020g018774.1	Cup000051g032465.1
Cup000003g002979.A	0	0	0	0	0	0	0	0				Cup000021g019120.1	Cup000032g025294.1	Cup000003g002666.1				Cup000061g034797.1	Cup000032g025294.1
Cup000003g002986.1	0	0	0	0	0	0	0	0				Cup000013g013060.1	Cup000010g010444.1	Cup000010g010398.A				Cup000003g003403.1	Cup000010g010444.1
Cup000003g002991.1	0	0	0	0	0	0	0	0				Cup000009g009444.1	Cup000182g042991.1	Cup000043g029864.1				Cup000030g024464.1	Cup000182g042991.1
Cup000003g002993.A	0	0	0	0	0	0	0	0				Cup000122g040789.A	Cup000032g025330.1	Cup000012g012977.A				Cup000016g015560.1	Cup000032g025330.1
Cup000003g002996.1	0	0	0	0	0	0	0	0				Cup000004g003951.1	Cup000052g032794.1	Cup000872g045324.1				Cup000007g007190.1	Cup000052g032794.1
Cup000003g002997.1	0	0	0	0	0	0	0	0				Cup000103g039687.1	Cup000503g044770.1	Cup002690g046316.A				Cup000001g000629.A	Cup000503g044770.1
Cup000003g003000.1	0	0	0	0	0	0	0	0				Cup000020g018666.1	Cup000020g018610.1	Cup000052g032750.A				Cup000047g031524.1	Cup000020g018610.1
Cup000003g003003.A	0	0	0	0	0	0	0	0				Cup000014g014541.1	Cup000044g030522.1	Cup000005g005556.1				Cup000025g021699.1	Cup000044g030522.1
Cup000003g003005.A	0	0	0	0	0	0	0	0				Cup000017g016678.1	Cup000012g012420.1	Cup000044g030504.1				Cup000011g012006.1	Cup000012g012420.1
Cup000003g003013.A	0	0	0	0	0	0	0	0				Cup000002g002081.1	Cup001627g045836.1	Cup000017g016856.1				Cup000008g008540.1	Cup001627g045836.1
Cup000003g003014.1	0	0	0	0	0	0	0	0				Cup000135g041335.1	Cup000007g007270.1	Cup000066g035814.1				Cup000007g008008.A	Cup000007g007270.1
Cup000003g003017.A	0	0	0	0	0	0	0	0				Cup000008g008251.A	Cup000008g008145.1	Cup000040g028583.1				Cup000038g027690.1	Cup000008g008145.1
Cup000003g003022.A	0	0	0	0	0	0	0	0				Cup000011g011481.1	Cup000051g032642.1	Cup000051g032371.1				Cup000056g033820.A	Cup000051g032642.1
Cup000003g003026.1	0	0	0	0	0	0	0	0				Cup000120g040674.A	Cup000016g016016.1	Cup000129g041004.1				Cup000342g044267.1	Cup000016g016016.1
Cup000003g003030.A	0	0	0	0	0	0	0	0				Cup000010g010984.1	Cup000097g039194.1	Cup000153g042096.1				Cup000016g015957.1	Cup000097g039194.1
Cup000003g003034.1	0	0	0	0	0	0	0	0				Cup003686g046553.1	Cup000008g008560.1	Cup000006g006573.1				Cup000011g011412.1	Cup000008g008560.1
Cup000003g003040.A	0	0	0	0	0	0	0	0				Cup000040g028726.1	Cup000004g003994.A	Cup000007g007043.1				Cup000004g004015.A	Cup000004g003994.A
Cup000003g003042.A	0	0	0	0	0	0	0	0				Cup000008g008235.1	Cup000031g024580.1	Cup000051g032625.1				Cup000047g031532.1	Cup000031g024580.1
Cup000003g003046.1	0	0	0	0	0	0	0	0				Cup000051g032358.1	Cup000016g015392.A	Cup000490g044730.1				Cup000016g015559.1	Cup000016g015392.A
Cup000003g003050.A	0	0	0	0	0	0	0	0				Cup000141g041566.1	Cup000061g034634.1	Cup000053g033159.A				Cup000032g025515.1	Cup000061g034634.1
Cup000003g003051.A	0	0	0	0	0	0	0	0				Cup000107g040083.1	Cup000030g024097.A	Cup000067g035921.1				Cup000028g023010.1	Cup000030g024097.A
Cup000003g003058.1	0	0	0	0	0	0	0	0				Cup000062g034932.1	Cup000025g021690.1	Cup000005g005599.A				Cup000007g007750.1	Cup000025g021690.1
Cup000003g003059.1	0	0	0	0	0	0	0	0				Cup000001g001288.1	Cup000093g038682.1	Cup000020g018738.1				Cup000003g002875.A	Cup000093g038682.1
Cup000003g003060.1	0	0	0	0	0	0	0	0				Cup000065g035432.1	Cup000089g038195.1	Cup000018g017470.1				Cup000013g012986.1	Cup000089g038195.1
Cup000003g003070.A	0	0	0	0	0	0	0	0				Cup000017g016845.1	Cup000035g026555.1	Cup000014g014203.1				Cup000020g018433.1	Cup000035g026555.1
Cup000003g003079.1	0	0	0	0	0	0	0	0				Cup000021g019200.1	Cup000009g009069.1	Cup000032g025335.1				Cup000033g026033.1	Cup000009g009069.1
Cup000003g003080.A	0	0	0	0	0	0	0	0				Cup000076g036914.1	Cup000041g029225.1	Cup000222g043573.1				Cup000043g030049.1	Cup000041g029225.1
Cup000003g003082.A	0	0	0	0	0	0	0	0				Cup000023g020360.A	Cup000016g015449.1	Cup000057g033949.1				Cup000003g002932.1	Cup000016g015449.1
Cup000003g003084.A	0	0	0	0	0	0	0	0				Cup000169g042610.1	Cup000062g034898.A	Cup000049g032090.1				Cup000108g040161.1	Cup000062g034898.A
Cup000003g003086.A	0	0	0	0	0	0	0	0				Cup000040g028798.1	Cup000022g019677.1	Cup000102g039518.1				Cup000046g031092.1	Cup000022g019677.1
Cup000003g003087.1	0	0	0	0	0	0	0	0				Cup000020g018768.A	Cup000195g043234.1	Cup000013g013771.1				Cup000012g012615.1	Cup000195g043234.1
Cup000003g003110.A	0	0	0	0	0	0	0	0				Cup000159g042284.A	Cup000013g013616.1	Cup000015g015384.A				Cup000021g019464.1	Cup000013g013616.1
Cup000003g003112.A	0	0	0	0	0	0	0	0				Cup000001g000095.A	Cup000020g019084.1	Cup000131g041135.1				Cup000008g008193.1	Cup000020g019084.1
Cup000003g003115.1	0	0	0	0	0	0	0	0				Cup000009g009576.1	Cup000033g025570.1	Cup000046g031336.1				Cup000048g031883.1	Cup000033g025570.1
Cup000003g003118.A	0	0	0	0	0	0	0	0				Cup000022g019661.1	Cup000017g016847.1	Cup000073g036540.1				Cup000094g038912.A	Cup000017g016847.1
Cup000003g003119.1	0	0	0	0	0	0	0	0				Cup000067g035938.1	Cup000095g038922.1	Cup000008g008576.1				Cup000060g034558.1	Cup000095g038922.1
Cup000003g003120.A	0	0	0	0	0	0	0	0				Cup000002g002368.1	Cup000796g045222.A	Cup000020g018520.1				Cup000012g012654.1	Cup000796g045222.A
Cup000003g003124.A	0	0	0	0	0	0	0	0				Cup000015g014987.1	Cup000049g032131.1	Cup000383g044405.A				Cup000054g033267.1	Cup000049g032131.1
Cup000003g003130.A	0	0	0	0	0	0	0	0				Cup000010g010445.1	Cup000016g015549.1	Cup000006g006876.A				Cup000057g034050.A	Cup000016g015549.1
Cup000003g003145.A	0	0	0	0	0	0	0	0				Cup000061g034757.1	Cup000002g001757.1	Cup000107g040018.1				Cup000009g009369.1	Cup000002g001757.1
Cup000003g003156.A	0	0	0	0	0	0	0	0				Cup000031g024779.A	Cup000013g013705.1	Cup000068g035978.1				Cup000004g003866.1	Cup000013g013705.1
Cup000003g003162.1	0	0	0	0	0	0	0	0				Cup000013g013694.1	Cup000042g029713.1	Cup000011g011524.1				Cup000143g041618.1	Cup000042g029713.1
Cup000003g003171.1	0	0	0	0	0	0	0	0				Cup000065g035462.1	Cup000008g008175.1	Cup000056g033824.1				Cup000011g011908.1	Cup000008g008175.1
Cup000003g003180.A	0	0	0	0	0	0	0	0				Cup000012g012245.1	Cup000105g039870.1	Cup000035g026980.A				Cup000083g037550.1	Cup000105g039870.1
Cup000003g003205.A	0	0	0	0	0	0	0	0				Cup000042g029696.1	Cup000028g023071.A	Cup000038g027903.1				Cup000003g003618.A	Cup000028g023071.A
Cup000003g003244.A	0	0	0	0	0	0	0	0				Cup002779g046351.A	Cup000025g021466.1	Cup000003g002686.1				Cup000013g013612.1	Cup000025g021466.1
Cup000003g003251.1	0	0	0	0	0	0	0	0				Cup000133g041199.1	Cup000198g043311.1	Cup000004g003933.1				Cup000042g029767.1	Cup000198g043311.1
Cup000003g003256.1	0	0	0	0	0	0	0	0				Cup000013g013138.1	Cup000007g007160.1	Cup000032g025359.1				Cup000130g041071.A	Cup000007g007160.1
Cup000003g003273.A	0	0	0	0	0	0	0	0				Cup000014g014200.1	Cup000088g038160.1	Cup000024g020713.A				Cup000032g025416.1	Cup000088g038160.1
Cup000003g003285.1	0	0	0	0	0	0	0	0				Cup000002g002111.1	Cup000049g031957.1	Cup000004g004257.1				Cup000012g012356.1	Cup000049g031957.1
Cup000003g003289.1	0	0	0	0	0	0	0	0				Cup000011g011805.A	Cup000013g013772.1	Cup000031g024950.1				Cup000018g017088.A	Cup000013g013772.1
Cup000003g003297.1	0	0	0	0	0	0	0	0				Cup000104g039823.1	Cup000039g028226.1	Cup000035g026674.1				Cup000006g006144.1	Cup000039g028226.1
Cup000003g003308.1	0	0	0	0	0	0	0	0				Cup000143g041661.1	Cup000032g025198.1	Cup000026g022221.1				Cup000025g021749.1	Cup000032g025198.1
Cup000003g003310.A	0	0	0	0	0	0	0	0				Cup000042g029750.1	Cup000018g017528.A	Cup000114g040370.1				Cup000024g020941.A	Cup000018g017528.A
Cup000003g003322.A	0	0	0	0	0	0	0	0				Cup000005g005760.1	Cup000014g014589.A	Cup000071g036312.1				Cup000090g038265.1	Cup000014g014589.A
Cup000003g003345.1	0	0	0	0	0	0	0	0				Cup000041g029096.1	Cup000041g029253.A	Cup000003g003165.1				Cup000060g034559.A	Cup000041g029253.A
Cup000003g003359.1	0	0	0	0	0	0	0	0				Cup000011g011945.1	Cup000037g027283.A	Cup000041g029268.1				Cup000019g018349.1	Cup000037g027283.A
Cup000003g003361.1	0	0	0	0	0	0	0	0				Cup000056g033843.1	Cup000039g028381.1	Cup000026g022268.1				Cup000082g037411.A	Cup000039g028381.1
Cup000003g003372.1	0	0	0	0	0	0	0	0				Cup000102g039526.1	Cup002497g046241.1	Cup000083g037560.1				Cup000097g039202.A	Cup002497g046241.1
Cup000003g003375.1	0	0	0	0	0	0	0	0				Cup000028g023232.1	Cup000035g026632.1	Cup000017g016492.1				Cup000001g001230.A	Cup000035g026632.1
Cup000003g003387.1	0	0	0	0	0	0	0	0				Cup000007g007212.1	Cup000022g019804.1	Cup000003g003131.1				Cup000422g044515.1	Cup000022g019804.1
Cup000003g003395.A	0	0	0	0	0	0	0	0				Cup000029g023761.1	Cup000007g007264.1	Cup000039g028356.1				Cup000007g007244.1	Cup000007g007264.1
Cup000003g003405.1	0	0	0	0	0	0	0	0				Cup000041g029235.1	Cup000025g021708.1	Cup000005g004886.1				Cup000017g016594.1	Cup000025g021708.1
Cup000003g003411.1	0	0	0	0	0	0	0	0				Cup000019g017752.A	Cup000002g002035.1	Cup000033g025719.1				Cup000014g014449.A	Cup000002g002035.1
Cup000003g003471.1	0	0	0	0	0	0	0	0				Cup000134g041254.1	Cup000029g023756.1	Cup000013g013303.1				Cup000044g030175.1	Cup000029g023756.1
Cup000003g003478.1	0	0	0	0	0	0	0	0				Cup000056g033716.A	Cup000006g006093.1	Cup000046g031203.1				Cup001195g045603.1	Cup000006g006093.1
Cup000003g003482.1	0	0	0	0	0	0	0	0				Cup000002g001493.1	Cup000713g045110.1	Cup000001g000913.1					Cup000713g045110.1
Cup000003g003483.A	0	0	0	0	0	0	0	0				Cup000016g015431.1	Cup000018g017374.1	Cup000020g018492.1					Cup000018g017374.1
Cup000003g003486.A	0	0	0	0	0	0	0	0				Cup000037g027448.1	Cup000054g033426.1	Cup000130g041091.1					Cup000054g033426.1
Cup000003g003497.1	0	0	0	0	0	0	0	0				Cup000013g013823.1	Cup000061g034771.1	Cup000108g040148.1					Cup000061g034771.1
Cup000003g003500.A	0	0	0	0	0	0	0	0				Cup000001g000331.1	Cup000072g036494.1	Cup000026g021940.1					Cup000072g036494.1
Cup000003g003509.A	0	0	0	0	0	0	0	0				Cup000074g036684.1	Cup000015g015045.1	Cup000017g016493.1					Cup000015g015045.1
Cup000003g003510.1	0	0	0	0	0	0	0	0				Cup000012g012419.1	Cup000030g024358.1	Cup000041g029278.A					Cup000030g024358.1
Cup000003g003511.A	0	0	0	0	0	0	0	0				Cup000196g043273.1	Cup000021g019216.A	Cup000119g040576.1					Cup000021g019216.A
Cup000003g003513.A	0	0	0	0	0	0	0	0				Cup000024g020701.1	Cup000020g018966.1	Cup000003g003210.1					Cup000020g018966.1
Cup000003g003515.1	0	0	0	0	0	0	0	0				Cup000006g006697.1	Cup000014g014614.1	Cup000027g022723.1					Cup000014g014614.1
Cup000003g003528.A	0	0	0	0	0	0	0	0				Cup000013g013769.1	Cup000030g024307.1	Cup000006g006072.A					Cup000030g024307.1
Cup000003g003530.A	0	0	0	0	0	0	0	0				Cup000065g035425.1	Cup000005g005185.1	Cup000003g003246.1					Cup000005g005185.1
Cup000003g003531.A	0	0	0	0	0	0	0	0				Cup000001g000321.1	Cup000046g031005.A	Cup000007g007088.1					Cup000046g031005.A
Cup000003g003534.A	0	0	0	0	0	0	0	0				Cup000007g007183.1	Cup000006g006362.1	Cup000039g028492.1					Cup000006g006362.1
Cup000003g003535.A	0	0	0	0	0	0	0	0				Cup000043g030063.1	Cup000019g017774.1	Cup000012g012656.1					Cup000019g017774.1
Cup000003g003538.1	0	0	0	0	0	0	0	0				Cup000106g039947.1	Cup000030g024403.1	Cup000026g022258.1					Cup000030g024403.1
Cup000003g003541.A	0	0	0	0	0	0	0	0				Cup000001g000229.1	Cup000066g035783.1	Cup000021g019423.1					Cup000066g035783.1
Cup000003g003549.1	0	0	0	0	0	0	0	0				Cup000035g026868.1	Cup000006g006116.1	Cup000044g030247.1					Cup000006g006116.1
Cup000003g003550.A	0	0	0	0	0	0	0	0				Cup000005g005189.1	Cup000040g028877.1	Cup000005g005569.1					Cup000040g028877.1
Cup000003g003552.1	0	0	0	0	0	0	0	0				Cup000026g022022.1	Cup000009g009717.1	Cup000020g018588.1					Cup000009g009717.1
Cup000003g003556.1	0	0	0	0	0	0	0	0				Cup000008g008121.1	Cup000044g030455.1	Cup000066g035735.1					Cup000044g030455.1
Cup000003g003564.A	0	0	0	0	0	0	0	0				Cup000013g013739.1	Cup000015g014976.1	Cup000054g033289.1					Cup000015g014976.1
Cup000003g003587.A	0	0	0	0	0	0	0	0				Cup000004g003961.1	Cup000009g009065.1	Cup000049g032103.1					Cup000009g009065.1
Cup000003g003589.1	0	0	0	0	0	0	0	0				Cup000032g025382.1	Cup000003g002833.A	Cup000030g024102.1					Cup000003g002833.A
Cup000003g003590.A	0	0	0	0	0	0	0	0				Cup000186g043049.1	Cup000007g007728.1	Cup000017g016489.A					Cup000007g007728.1
Cup000003g003594.A	0	0	0	0	0	0	0	0				Cup000090g038283.1	Cup000024g021072.1	Cup000214g043520.1					Cup000024g021072.1
Cup000003g003595.1	0	0	0	0	0	0	0	0				Cup000002g002044.1	Cup000066g035758.1	Cup000029g023541.1					Cup000066g035758.1
Cup000003g003599.A	0	0	0	0	0	0	0	0				Cup000071g036377.A	Cup000043g030012.A	Cup000001g000843.1					Cup000043g030012.A
Cup000003g003613.A	0	0	0	0	0	0	0	0				Cup000035g026964.1	Cup000656g045021.A	Cup000014g014636.1					Cup000656g045021.A
Cup000003g003616.A	0	0	0	0	0	0	0	0				Cup000132g041151.A	Cup000033g025668.1	Cup000025g021796.1					Cup000033g025668.1
Cup000003g003619.1	0	0	0	0	0	0	0	0				Cup000006g006692.1	Cup000033g025597.1	Cup000031g024926.1					Cup000033g025597.1
Cup000003g003620.1	0	0	0	0	0	0	0	0				Cup000007g007736.1	Cup000066g035605.1	Cup000006g006332.1					Cup000066g035605.1
Cup000003g003621.A	0	0	0	0	0	0	0	0				Cup000017g016416.1	Cup000124g040859.A	Cup000013g013724.1					Cup000124g040859.A
Cup000003g003624.A	0	0	0	0	0	0	0	0				Cup000008g008658.1	Cup000010g010989.1	Cup000014g014210.1					Cup000010g010989.1
Cup000003g003626.A	0	0	0	0	0	0	0	0				Cup000035g026523.A	Cup000025g021871.1	Cup000015g015041.A					Cup000025g021871.1
Cup000003g003627.A	0	0	0	0	0	0	0	0				Cup000153g042099.1	Cup000044g030462.1	Cup000006g006064.1					Cup000044g030462.1
Cup000003g003628.A	0	0	0	0	0	0	0	0				Cup000002g001571.1	Cup000556g044853.A	Cup000010g010409.1					Cup000556g044853.A
Cup000003g003630.A	0	0	0	0	0	0	0	0				Cup000057g034005.1	Cup000021g019165.1	Cup000021g019120.1					Cup000021g019165.1
Cup000003g003631.A	0	0	0	0	0	0	0	0				Cup000011g011954.1	Cup000031g024594.1	Cup000013g013060.1					Cup000031g024594.1
Cup000003g003634.1	0	0	0	0	0	0	0	0				Cup000051g032429.1	Cup000005g005122.1	Cup000009g009444.1					Cup000005g005122.1
Cup000003g003635.1	0	0	0	0	0	0	0	0				Cup000005g005448.1	Cup000138g041421.1	Cup000122g040789.A					Cup000138g041421.1
Cup000003g003637.A	0	0	0	0	0	0	0	0				Cup000021g019426.A	Cup000013g013763.1	Cup000169g042644.A					Cup000013g013763.1
Cup000003g003640.A	0	0	0	0	0	0	0	0				Cup000014g014742.1	Cup000033g025561.1	Cup000004g003951.1					Cup000033g025561.1
Cup000004g003649.A	0	0	0	0	0	0	0	0				Cup000122g040732.1	Cup000016g016114.1	Cup000103g039687.1					Cup000016g016114.1
Cup000004g003675.A	0	0	0	0	0	0	0	0				Cup000041g029302.A	Cup000009g009274.1	Cup000028g023079.1					Cup000009g009274.1
Cup000004g003698.1	0	0	0	0	0	0	0	0				Cup000025g021406.1	Cup000033g025638.A	Cup000020g018666.1					Cup000033g025638.A
Cup000004g003712.A	0	0	0	0	0	0	0	0				Cup000013g013879.1	Cup000013g013708.1	Cup000014g014541.1					Cup000013g013708.1
Cup000004g003714.1	0	0	0	0	0	0	0	0				Cup000007g007353.1	Cup000098g039240.1	Cup000017g016678.1					Cup000098g039240.1
Cup000004g003731.1	0	0	0	0	0	0	0	0				Cup000144g041699.1	Cup000054g033233.1	Cup000002g002081.1					Cup000054g033233.1
Cup000004g003732.A	0	0	0	0	0	0	0	0				Cup000027g022592.1	Cup000173g042775.1	Cup000135g041335.1					Cup000173g042775.1
Cup000004g003740.1	0	0	0	0	0	0	0	0				Cup000022g019676.1	Cup000098g039236.A	Cup000008g008251.A					Cup000098g039236.A
Cup000004g003749.A	0	0	0	0	0	0	0	0				Cup000002g002195.1	Cup000005g004993.1	Cup000017g016377.1					Cup000005g004993.1
Cup000004g003770.1	0	0	0	0	0	0	0	0				Cup000018g017553.1	Cup000002g002269.1	Cup000011g011481.1					Cup000002g002269.1
Cup000004g003786.1	0	0	0	0	0	0	0	0				Cup000010g011001.1	Cup000106g039963.A	Cup000120g040674.A					Cup000106g039963.A
Cup000004g003787.1	0	0	0	0	0	0	0	0				Cup000065g035401.1	Cup000037g027435.1	Cup000010g010984.1					Cup000037g027435.1
Cup000004g003796.A	0	0	0	0	0	0	0	0				Cup000038g028066.1	Cup000026g022059.1	Cup003686g046553.1					Cup000026g022059.1
Cup000004g003797.1	0	0	0	0	0	0	0	0				Cup000016g016039.1	Cup000037g027341.1	Cup000040g028726.1					Cup000037g027341.1
Cup000004g003801.A	0	0	0	0	0	0	0	0				Cup000032g025445.1	Cup000032g025356.1	Cup000008g008235.1					Cup000032g025356.1
Cup000004g003835.1	0	0	0	0	0	0	0	0				Cup000033g026025.1	Cup000013g013136.1	Cup000051g032358.1					Cup000013g013136.1
Cup000004g003854.1	0	0	0	0	0	0	0	0				Cup000069g036192.1	Cup000003g003232.1	Cup000004g004202.1					Cup000003g003232.1
Cup000004g003913.1	0	0	0	0	0	0	0	0				Cup000006g006763.1	Cup000009g009625.1	Cup000141g041566.1					Cup000009g009625.1
Cup000004g003929.A	0	0	0	0	0	0	0	0				Cup000009g009279.1	Cup000024g020875.1	Cup000016g015467.A					Cup000024g020875.1
Cup000004g003959.A	0	0	0	0	0	0	0	0				Cup000049g032026.A	Cup000010g010971.1	Cup000107g040083.1					Cup000010g010971.1
Cup000004g003965.1	0	0	0	0	0	0	0	0				Cup000092g038597.1	Cup000011g011227.1	Cup000062g034932.1					Cup000011g011227.1
Cup000004g003984.A	0	0	0	0	0	0	0	0				Cup000003g002724.1	Cup000031g024945.1	Cup000045g030734.A					Cup000031g024945.1
Cup000004g003993.1	0	0	0	0	0	0	0	0				Cup000006g006271.1	Cup000040g028631.1	Cup000001g001288.1					Cup000040g028631.1
Cup000004g003999.A	0	0	0	0	0	0	0	0				Cup000021g019419.1	Cup000128g040992.1	Cup000065g035432.1					Cup000128g040992.1
Cup000004g004000.A	0	0	0	0	0	0	0	0				Cup000006g006679.1	Cup000046g031216.1	Cup000017g016845.1					Cup000046g031216.1
Cup000004g004006.1	0	0	0	0	0	0	0	0				Cup000049g032133.1	Cup000162g042396.1	Cup000021g019200.1					Cup000162g042396.1
Cup000004g004011.A	0	0	0	0	0	0	0	0				Cup000045g030880.1	Cup000051g032564.1	Cup000076g036914.1					Cup000051g032564.1
Cup000004g004013.1	0	0	0	0	0	0	0	0				Cup000021g019104.A	Cup000252g043815.1	Cup000023g020360.A					Cup000252g043815.1
Cup000004g004019.A	0	0	0	0	0	0	0	0				Cup000074g036763.1	Cup000046g031016.1	Cup000169g042610.1					Cup000046g031016.1
Cup000004g004023.A	0	0	0	0	0	0	0	0				Cup000247g043749.1	Cup000052g032885.1	Cup000040g028798.1					Cup000052g032885.1
Cup000004g004024.A	0	0	0	0	0	0	0	0				Cup000013g013860.1	Cup000034g026437.A	Cup000020g018768.A					Cup000034g026437.A
Cup000004g004027.A	0	0	0	0	0	0	0	0				Cup000009g009686.A	Cup000129g041009.1	Cup000017g016640.1					Cup000129g041009.1
Cup000004g004043.A	0	0	0	0	0	0	0	0				Cup000004g003728.1	Cup000001g001393.A	Cup000159g042284.A					Cup000001g001393.A
Cup000004g004046.A	0	0	0	0	0	0	0	0				Cup000016g015619.1	Cup000012g012503.A	Cup000001g000095.A					Cup000012g012503.A
Cup000004g004053.A	0	0	0	0	0	0	0	0				Cup000016g015491.1	Cup000014g014519.1	Cup000018g017724.A					Cup000014g014519.1
Cup000004g004057.1	0	0	0	0	0	0	0	0				Cup000001g000855.A	Cup000086g038002.1	Cup000009g009576.1					Cup000086g038002.1
Cup000004g004058.1	0	0	0	0	0	0	0	0				Cup000052g032889.1	Cup000130g041058.A	Cup000027g022727.1					Cup000130g041058.A
Cup000004g004061.1	0	0	0	0	0	0	0	0				Cup000024g020811.1	Cup000061g034769.1	Cup000022g019661.1					Cup000061g034769.1
Cup000004g004076.A	0	0	0	0	0	0	0	0				Cup000102g039549.1	Cup000016g015580.1	Cup000056g033768.1					Cup000016g015580.1
Cup000004g004091.A	0	0	0	0	0	0	0	0				Cup000043g030024.A	Cup000074g036685.1	Cup000006g006804.1					Cup000074g036685.1
Cup000004g004094.1	0	0	0	0	0	0	0	0				Cup000044g030477.1	Cup000091g038345.1	Cup000067g035938.1					Cup000091g038345.1
Cup000004g004096.1	0	0	0	0	0	0	0	0				Cup000006g006260.1	Cup000021g019159.1	Cup000002g002368.1					Cup000021g019159.1
Cup000004g004108.1	0	0	0	0	0	0	0	0				Cup000016g015507.1	Cup000006g006785.1	Cup000015g014987.1					Cup000006g006785.1
Cup000004g004114.1	0	0	0	0	0	0	0	0				Cup000004g003934.1	Cup000083g037442.1	Cup000010g010445.1					Cup000083g037442.1
Cup000004g004116.A	0	0	0	0	0	0	0	0				Cup000023g020334.1	Cup000018g017126.1	Cup000061g034757.1					Cup000018g017126.1
Cup000004g004117.A	0	0	0	0	0	0	0	0				Cup000039g028266.1	Cup000004g004049.1	Cup000003g003374.1					Cup000004g004049.1
Cup000004g004119.A	0	0	0	0	0	0	0	0				Cup000016g015561.A	Cup000006g006073.1	Cup000031g024779.A					Cup000006g006073.1
Cup000004g004124.1	0	0	0	0	0	0	0	0				Cup000005g005665.1	Cup000018g017611.1	Cup000013g013694.1					Cup000018g017611.1
Cup000004g004134.1	0	0	0	0	0	0	0	0				Cup000001g001004.1	Cup000020g018917.1	Cup000065g035462.1					Cup000020g018917.1
Cup000004g004137.A	0	0	0	0	0	0	0	0				Cup000002g002238.1	Cup000062g034945.1	Cup000012g012245.1					Cup000062g034945.1
Cup000004g004144.A	0	0	0	0	0	0	0	0				Cup000084g037641.1	Cup000011g011881.1	Cup000042g029696.1					Cup000011g011881.1
Cup000004g004147.1	0	0	0	0	0	0	0	0				Cup000048g031650.1	Cup000022g020152.A	Cup000003g002945.1					Cup000022g020152.A
Cup000004g004148.A	0	0	0	0	0	0	0	0				Cup000001g000129.1	Cup000052g032772.A	Cup002779g046351.A					Cup000052g032772.A
Cup000004g004149.A	0	0	0	0	0	0	0	0				Cup000042g029506.1	Cup000048g031625.1	Cup000133g041199.1					Cup000048g031625.1
Cup000004g004163.A	0	0	0	0	0	0	0	0				Cup000103g039591.A	Cup000041g029037.1	Cup000013g013138.1					Cup000041g029037.1
Cup000004g004166.A	0	0	0	0	0	0	0	0				Cup000044g030256.1	Cup000048g031708.1	Cup000014g014200.1					Cup000048g031708.1
Cup000004g004167.1	0	0	0	0	0	0	0	0				Cup000097g039142.A	Cup000040g028548.1	Cup000002g002111.1					Cup000040g028548.1
Cup000004g004169.1	0	0	0	0	0	0	0	0				Cup000004g003974.1	Cup000004g004367.1	Cup000117g040539.1					Cup000004g004367.1
Cup000004g004172.A	0	0	0	0	0	0	0	0				Cup000013g013197.1	Cup000016g016204.A	Cup000011g011805.A					Cup000016g016204.A
Cup000004g004186.1	0	0	0	0	0	0	0	0				Cup000037g027508.1	Cup000004g003813.A	Cup000104g039823.1					Cup000004g003813.A
Cup000004g004190.A	0	0	0	0	0	0	0	0				Cup000041g029039.1	Cup000065g035376.1	Cup000143g041661.1					Cup000065g035376.1
Cup000004g004191.A	0	0	0	0	0	0	0	0				Cup000002g002173.1	Cup000010g010314.A	Cup000005g005632.1					Cup000010g010314.A
Cup000004g004192.1	0	0	0	0	0	0	0	0				Cup000073g036580.1	Cup000003g003134.1	Cup000042g029750.1					Cup000003g003134.1
Cup000004g004203.A	0	0	0	0	0	0	0	0				Cup000008g008742.1	Cup000038g028074.1	Cup000005g005237.1					Cup000038g028074.1
Cup000004g004204.A	0	0	0	0	0	0	0	0				Cup000132g041171.1	Cup000016g015877.A	Cup000005g005760.1					Cup000016g015877.A
Cup000004g004205.A	0	0	0	0	0	0	0	0				Cup000035g026953.1	Cup000077g036995.1	Cup000041g029096.1					Cup000077g036995.1
Cup000004g004207.A	0	0	0	0	0	0	0	0				Cup000169g042655.1	Cup000052g032934.1	Cup000052g032752.1					Cup000052g032934.1
Cup000004g004212.A	0	0	0	0	0	0	0	0				Cup000085g037848.1	Cup000777g045193.1	Cup000011g011945.1					Cup000777g045193.1
Cup000004g004215.A	0	0	0	0	0	0	0	0				Cup000034g026403.1	Cup000001g000781.1	Cup000197g043283.1					Cup000001g000781.1
Cup000004g004219.A	0	0	0	0	0	0	0	0				Cup000009g009300.A	Cup000013g013117.A	Cup000011g011959.1					Cup000013g013117.A
Cup000004g004236.A	0	0	0	0	0	0	0	0				Cup000018g017572.1	Cup000021g019175.1	Cup000056g033843.1					Cup000021g019175.1
Cup000004g004237.A	0	0	0	0	0	0	0	0				Cup000006g006960.A	Cup000001g001147.1	Cup000102g039526.1					Cup000001g001147.1
Cup000004g004238.A	0	0	0	0	0	0	0	0				Cup000083g037451.1	Cup000130g041045.1	Cup000028g023232.1					Cup000130g041045.1
Cup000004g004243.A	0	0	0	0	0	0	0	0				Cup000034g026385.1	Cup000024g020812.A	Cup000007g007212.1					Cup000024g020812.A
Cup000004g004246.A	0	0	0	0	0	0	0	0				Cup002708g046326.1	Cup000080g037248.1	Cup000029g023761.1					Cup000080g037248.1
Cup000004g004285.A	0	0	0	0	0	0	0	0				Cup000083g037446.1	Cup000016g015399.1	Cup000041g029235.1					Cup000016g015399.1
Cup000004g004294.1	0	0	0	0	0	0	0	0				Cup000013g013896.1	Cup000029g023401.A	Cup000019g017752.A					Cup000029g023401.A
Cup000004g004331.A	0	0	0	0	0	0	0	0				Cup000010g010726.1	Cup000005g005635.A	Cup000134g041254.1					Cup000005g005635.A
Cup000004g004334.1	0	0	0	0	0	0	0	0				Cup000040g028825.A	Cup000020g018933.1	Cup000056g033716.A					Cup000020g018933.1
Cup000004g004337.1	0	0	0	0	0	0	0	0				Cup000004g004260.1	Cup000039g028304.A	Cup000002g001493.1					Cup000039g028304.A
Cup000004g004366.A	0	0	0	0	0	0	0	0				Cup000042g029660.1	Cup000007g007830.1	Cup000016g015431.1					Cup000007g007830.1
Cup000004g004372.1	0	0	0	0	0	0	0	0				Cup000020g018448.1	Cup000005g005133.1	Cup000037g027448.1					Cup000005g005133.1
Cup000004g004376.A	0	0	0	0	0	0	0	0				Cup000029g023375.1	Cup000125g040868.1	Cup000013g013823.1					Cup000125g040868.1
Cup000004g004377.1	0	0	0	0	0	0	0	0				Cup000007g007671.1	Cup000003g002811.1	Cup000001g000331.1					Cup000003g002811.1
Cup000004g004381.1	0	0	0	0	0	0	0	0				Cup000008g008301.1	Cup000006g006257.1	Cup000074g036684.1					Cup000006g006257.1
Cup000004g004454.1	0	0	0	0	0	0	0	0				Cup000024g020798.1	Cup000117g040506.1	Cup000025g021638.1					Cup000117g040506.1
Cup000004g004455.A	0	0	0	0	0	0	0	0				Cup000021g019490.1	Cup000052g032745.1	Cup000004g004613.1					Cup000052g032745.1
Cup000004g004459.A	0	0	0	0	0	0	0	0				Cup000001g000846.1	Cup000051g032635.1	Cup000012g012419.1					Cup000051g032635.1
Cup000004g004465.1	0	0	0	0	0	0	0	0				Cup000024g021051.1	Cup000005g005836.1	Cup000003g003410.A					Cup000005g005836.1
Cup000004g004484.A	0	0	0	0	0	0	0	0				Cup000297g044083.A	Cup000044g030269.1	Cup000196g043273.1					Cup000044g030269.1
Cup000004g004510.A	0	0	0	0	0	0	0	0				Cup000035g026605.1	Cup000104g039718.1	Cup000024g020701.1					Cup000104g039718.1
Cup000004g004516.A	0	0	0	0	0	0	0	0				Cup000062g034951.1	Cup000005g004951.1	Cup000045g030624.1					Cup000005g004951.1
Cup000004g004534.1	0	0	0	0	0	0	0	0				Cup000037g027513.1	Cup000017g016661.1	Cup000006g006697.1					Cup000017g016661.1
Cup000004g004546.1	0	0	0	0	0	0	0	0				Cup000005g005027.A	Cup000025g021668.1	Cup000013g013769.1					Cup000025g021668.1
Cup000004g004564.A	0	0	0	0	0	0	0	0				Cup000023g020562.1	Cup000051g032588.1	Cup000065g035425.1					Cup000051g032588.1
Cup000004g004579.A	0	0	0	0	0	0	0	0				Cup000106g039953.1	Cup000160g042302.1	Cup000001g000321.1					Cup000160g042302.1
Cup000004g004616.A	0	0	0	0	0	0	0	0				Cup000034g026210.1	Cup000027g022570.1	Cup000007g007183.1					Cup000027g022570.1
Cup000004g004624.A	0	0	0	0	0	0	0	0				Cup000033g025923.1	Cup000001g001098.1	Cup000043g030063.1					Cup000001g001098.1
Cup000004g004646.1	0	0	0	0	0	0	0	0				Cup000032g025138.A	Cup000009g009684.1	Cup000106g039947.1					Cup000009g009684.1
Cup000004g004657.1	0	0	0	0	0	0	0	0				Cup000057g034024.1	Cup000024g020764.A	Cup000001g000229.1					Cup000024g020764.A
Cup000004g004669.A	0	0	0	0	0	0	0	0				Cup000083g037508.1	Cup000085g037874.A	Cup000034g026387.1					Cup000085g037874.A
Cup000004g004677.1	0	0	0	0	0	0	0	0				Cup000009g009864.1	Cup000013g013135.1	Cup000003g002930.1					Cup000013g013135.1
Cup000004g004688.1	0	0	0	0	0	0	0	0				Cup000024g020835.A	Cup000054g033364.1	Cup000035g026868.1					Cup000054g033364.1
Cup000004g004693.1	0	0	0	0	0	0	0	0				Cup000158g042227.A	Cup000046g031220.1	Cup000005g005189.1					Cup000046g031220.1
Cup000004g004698.1	0	0	0	0	0	0	0	0				Cup000030g024402.1	Cup000120g040669.1	Cup000498g044757.A					Cup000120g040669.1
Cup000004g004702.A	0	0	0	0	0	0	0	0				Cup000019g018000.A	Cup000120g040641.A	Cup000004g004881.1					Cup000120g040641.A
Cup000004g004703.1	0	0	0	0	0	0	0	0				Cup000056g033746.1	Cup005804g046806.1	Cup000026g022022.1					Cup005804g046806.1
Cup000004g004704.A	0	0	0	0	0	0	0	0				Cup000083g037427.1	Cup000620g044943.1	Cup000084g037745.A					Cup000620g044943.1
Cup000004g004711.1	0	0	0	0	0	0	0	0				Cup000025g021602.A	Cup000022g019709.A	Cup000008g008121.1					Cup000022g019709.A
Cup000004g004719.A	0	0	0	0	0	0	0	0				Cup000035g026994.1	Cup000025g021359.1	Cup000013g013739.1					Cup000025g021359.1
Cup000004g004723.A	0	0	0	0	0	0	0	0				Cup000023g020372.1	Cup000169g042666.1	Cup000004g003961.1					Cup000169g042666.1
Cup000004g004727.A	0	0	0	0	0	0	0	0				Cup000016g015472.1	Cup000037g027343.1	Cup000032g025382.1					Cup000037g027343.1
Cup000004g004728.A	0	0	0	0	0	0	0	0				Cup000054g033380.1	Cup000060g034501.1	Cup000186g043049.1					Cup000060g034501.1
Cup000004g004734.1	0	0	0	0	0	0	0	0				Cup000004g003766.1	Cup000035g027078.1	Cup000090g038283.1					Cup000035g027078.1
Cup000004g004738.A	0	0	0	0	0	0	0	0				Cup000001g001001.A	Cup000002g001573.1	Cup000002g002044.1					Cup000002g001573.1
Cup000004g004742.A	0	0	0	0	0	0	0	0				Cup000046g031265.1	Cup000107g040078.A	Cup000071g036377.A					Cup000107g040078.A
Cup000004g004750.1	0	0	0	0	0	0	0	0				Cup000017g016360.1	Cup000009g009894.1	Cup000035g026964.1					Cup000009g009894.1
Cup000004g004752.1	0	0	0	0	0	0	0	0				Cup001936g046025.1	Cup000105g039902.1	Cup000132g041151.A					Cup000105g039902.1
Cup000004g004762.1	0	0	0	0	0	0	0	0				Cup000035g026962.A	Cup000031g024928.1	Cup000006g006692.1					Cup000031g024928.1
Cup000004g004767.A	0	0	0	0	0	0	0	0				Cup000004g003664.1	Cup000015g015264.1	Cup000007g007736.1					Cup000015g015264.1
Cup000004g004769.1	0	0	0	0	0	0	0	0				Cup000001g000065.1	Cup000037g027473.1	Cup000017g016416.1					Cup000037g027473.1
Cup000004g004770.A	0	0	0	0	0	0	0	0				Cup000013g013667.1	Cup000011g011867.1	Cup000008g008658.1					Cup000011g011867.1
Cup000004g004774.1	0	0	0	0	0	0	0	0				Cup000029g023675.A	Cup000018g017541.1	Cup000950g045413.A					Cup000018g017541.1
Cup000004g004780.1	0	0	0	0	0	0	0	0				Cup000005g005797.1	Cup000012g012709.A	Cup000035g026523.A					Cup000012g012709.A
Cup000004g004782.A	0	0	0	0	0	0	0	0				Cup000040g028558.1	Cup000004g004594.1	Cup000153g042099.1					Cup000004g004594.1
Cup000004g004786.A	0	0	0	0	0	0	0	0				Cup000004g004359.A	Cup000040g028846.1	Cup000002g001571.1					Cup000040g028846.1
Cup000004g004789.1	0	0	0	0	0	0	0	0				Cup000027g022509.1	Cup000045g030843.1	Cup000057g034005.1					Cup000045g030843.1
Cup000004g004794.A	0	0	0	0	0	0	0	0				Cup000009g009219.1	Cup000001g001145.1	Cup000011g011954.1					Cup000001g001145.1
Cup000004g004798.A	0	0	0	0	0	0	0	0				Cup000014g014230.1	Cup000001g001113.A	Cup000051g032429.1					Cup000001g001113.A
Cup000004g004805.A	0	0	0	0	0	0	0	0				Cup000025g021712.1	Cup000170g042686.1	Cup000005g005448.1					Cup000170g042686.1
Cup000004g004813.1	0	0	0	0	0	0	0	0				Cup000055g033573.1	Cup000091g038459.1	Cup000021g019426.A					Cup000091g038459.1
Cup000004g004816.A	0	0	0	0	0	0	0	0				Cup000016g015611.1	Cup000066g035705.1	Cup000014g014742.1					Cup000066g035705.1
Cup000004g004825.1	0	0	0	0	0	0	0	0				Cup000038g027691.1	Cup000034g026255.1	Cup000122g040732.1					Cup000034g026255.1
Cup000004g004826.1	0	0	0	0	0	0	0	0				Cup000007g007824.1	Cup000017g016340.1	Cup000041g029302.A					Cup000017g016340.1
Cup000004g004827.A	0	0	0	0	0	0	0	0				Cup000068g036004.A	Cup000038g027682.1	Cup000025g021406.1					Cup000038g027682.1
Cup000004g004831.A	0	0	0	0	0	0	0	0				Cup001165g045585.1	Cup000010g010201.A	Cup000013g013879.1					Cup000010g010201.A
Cup000004g004835.1	0	0	0	0	0	0	0	0				Cup000002g001638.1	Cup000003g002681.1	Cup000007g007353.1					Cup000003g002681.1
Cup000004g004837.1	0	0	0	0	0	0	0	0				Cup000143g041654.1	Cup000081g037338.1	Cup000144g041699.1					Cup000081g037338.1
Cup000004g004840.1	0	0	0	0	0	0	0	0				Cup000004g004320.1	Cup000035g026900.1	Cup000027g022592.1					Cup000035g026900.1
Cup000004g004842.1	0	0	0	0	0	0	0	0				Cup000003g002705.1	Cup000058g034203.1	Cup000005g005011.1					Cup000058g034203.1
Cup000004g004849.1	0	0	0	0	0	0	0	0				Cup000097g039203.1	Cup000010g010327.1	Cup000055g033463.1					Cup000010g010327.1
Cup000004g004860.A	0	0	0	0	0	0	0	0				Cup000019g018214.1	Cup000006g006784.1	Cup000022g019676.1					Cup000006g006784.1
Cup000004g004862.A	0	0	0	0	0	0	0	0				Cup000091g038445.1	Cup000090g038261.1	Cup000002g002195.1					Cup000090g038261.1
Cup000004g004870.1	0	0	0	0	0	0	0	0				Cup000007g007683.1	Cup000045g030704.1	Cup000013g013181.1					Cup000045g030704.1
Cup000004g004871.1	0	0	0	0	0	0	0	0				Cup000030g024003.1	Cup000007g007638.1	Cup000018g017553.1					Cup000007g007638.1
Cup000004g004878.A	0	0	0	0	0	0	0	0				Cup000029g023424.1	Cup000024g020703.1	Cup000010g011001.1					Cup000024g020703.1
Cup000004g004879.1	0	0	0	0	0	0	0	0				Cup000046g031045.1	Cup000020g018547.1	Cup000065g035401.1					Cup000020g018547.1
Cup000004g004884.A	0	0	0	0	0	0	0	0				Cup000103g039662.1	Cup000057g034007.A	Cup000038g028066.1					Cup000057g034007.A
Cup000005g004888.1	0	0	0	0	0	0	0	0				Cup000032g025468.A	Cup000001g001186.1	Cup000265g043898.1					Cup000001g001186.1
Cup000005g004906.1	0	0	0	0	0	0	0	0				Cup000018g017249.1	Cup000029g023706.1	Cup000016g016039.1					Cup000029g023706.1
Cup000005g004929.1	0	0	0	0	0	0	0	0				Cup000010g010805.1	Cup000029g023709.1	Cup000032g025445.1					Cup000029g023709.1
Cup000005g004941.A	0	0	0	0	0	0	0	0				Cup000010g010346.1	Cup000012g012697.1	Cup000041g029228.1					Cup000012g012697.1
Cup000005g004948.A	0	0	0	0	0	0	0	0				Cup000028g023026.1	Cup000090g038258.1	Cup000033g026025.1					Cup000090g038258.1
Cup000005g004949.A	0	0	0	0	0	0	0	0				Cup000005g005031.1	Cup000013g013669.1	Cup000021g019498.1					Cup000013g013669.1
Cup000005g004967.1	0	0	0	0	0	0	0	0				Cup000054g033255.A	Cup000009g009735.1	Cup000069g036192.1					Cup000009g009735.1
Cup000005g004969.1	0	0	0	0	0	0	0	0				Cup000013g013128.1	Cup000169g042609.1	Cup000006g006763.1					Cup000169g042609.1
Cup000005g005013.1	0	0	0	0	0	0	0	0				Cup000036g027181.1	Cup000044g030277.1	Cup000042g029561.1					Cup000044g030277.1
Cup000005g005017.A	0	0	0	0	0	0	0	0				Cup000002g002052.1	Cup000062g034849.1	Cup000009g009279.1					Cup000062g034849.1
Cup000005g005032.1	0	0	0	0	0	0	0	0				Cup000011g011912.1	Cup000015g015004.A	Cup000049g032026.A					Cup000015g015004.A
Cup000005g005040.A	0	0	0	0	0	0	0	0				Cup000023g020451.1	Cup000023g020369.A	Cup000009g009135.1					Cup000023g020369.A
Cup000005g005048.1	0	0	0	0	0	0	0	0				Cup000055g033509.1	Cup000054g033382.1	Cup000092g038597.1					Cup000054g033382.1
Cup000005g005081.1	0	0	0	0	0	0	0	0				Cup000004g003827.1	Cup000052g032876.1	Cup000003g002724.1					Cup000052g032876.1
Cup000005g005137.1	0	0	0	0	0	0	0	0				Cup000034g026330.1	Cup000009g009640.1	Cup000006g006271.1					Cup000009g009640.1
Cup000005g005141.1	0	0	0	0	0	0	0	0				Cup000162g042389.1	Cup000021g019441.1	Cup000021g019419.1					Cup000021g019441.1
Cup000005g005160.1	0	0	0	0	0	0	0	0				Cup000168g042520.1	Cup000010g010372.A	Cup000500g044763.1					Cup000010g010372.A
Cup000005g005187.A	0	0	0	0	0	0	0	0				Cup000271g043964.1	Cup000027g022725.1	Cup000013g013000.1					Cup000027g022725.1
Cup000005g005201.1	0	0	0	0	0	0	0	0				Cup000023g020338.1	Cup000051g032643.1	Cup000009g009265.1					Cup000051g032643.1
Cup000005g005218.A	0	0	0	0	0	0	0	0				Cup000025g021664.1	Cup000085g037767.1	Cup000006g006679.1					Cup000085g037767.1
Cup000005g005221.1	0	0	0	0	0	0	0	0				Cup000026g022312.1	Cup000038g027996.A	Cup000049g032133.1					Cup000038g027996.A
Cup000005g005238.1	0	0	0	0	0	0	0	0				Cup000013g013712.1	Cup000003g003418.1	Cup000045g030880.1					Cup000003g003418.1
Cup000005g005248.A	0	0	0	0	0	0	0	0				Cup000032g025134.1	Cup000084g037677.1	Cup000018g017504.1					Cup000084g037677.1
Cup000005g005251.1	0	0	0	0	0	0	0	0				Cup000013g013794.1	Cup000032g025297.1	Cup000021g019104.A					Cup000032g025297.1
Cup000005g005253.A	0	0	0	0	0	0	0	0				Cup000006g006824.1	Cup000017g016809.1	Cup000074g036763.1					Cup000017g016809.1
Cup000005g005254.A	0	0	0	0	0	0	0	0				Cup000080g037249.1	Cup000006g006209.1	Cup000247g043749.1					Cup000006g006209.1
Cup000005g005257.1	0	0	0	0	0	0	0	0				Cup000003g002889.1	Cup000001g000370.1	Cup000013g013860.1					Cup000001g000370.1
Cup000005g005263.A	0	0	0	0	0	0	0	0				Cup000013g013133.1	Cup000002g001993.1	Cup000009g009686.A					Cup000002g001993.1
Cup000005g005267.A	0	0	0	0	0	0	0	0				Cup000011g011207.1	Cup000285g044024.A	Cup000004g003728.1					Cup000285g044024.A
Cup000005g005269.A	0	0	0	0	0	0	0	0				Cup000009g009835.1	Cup000037g027354.A	Cup000063g035109.1					Cup000037g027354.A
Cup000005g005271.A	0	0	0	0	0	0	0	0				Cup000048g031792.1	Cup000003g002746.1	Cup000016g015619.1					Cup000003g002746.1
Cup000005g005282.A	0	0	0	0	0	0	0	0				Cup000003g002920.1	Cup000045g030701.1	Cup000001g001092.1					Cup000045g030701.1
Cup000005g005284.A	0	0	0	0	0	0	0	0				Cup000271g043950.1	Cup000032g025389.1	Cup000016g015491.1					Cup000032g025389.1
Cup000005g005286.A	0	0	0	0	0	0	0	0				Cup000009g009649.1	Cup000016g015995.1	Cup000009g009935.1					Cup000016g015995.1
Cup000005g005287.1	0	0	0	0	0	0	0	0				Cup000008g008345.1	Cup000009g009045.1	Cup000001g000855.A					Cup000009g009045.1
Cup000005g005294.1	0	0	0	0	0	0	0	0				Cup000097g039124.1	Cup000038g027943.1	Cup000052g032889.1					Cup000038g027943.1
Cup000005g005296.A	0	0	0	0	0	0	0	0				Cup000098g039264.1	Cup000104g039733.1	Cup000024g020811.1					Cup000104g039733.1
Cup000005g005297.A	0	0	0	0	0	0	0	0				Cup000011g011833.1	Cup000041g029127.1	Cup000102g039549.1					Cup000041g029127.1
Cup000005g005299.A	0	0	0	0	0	0	0	0				Cup000016g015565.1	Cup000003g003183.1	Cup000043g030024.A					Cup000003g003183.1
Cup000005g005302.1	0	0	0	0	0	0	0	0				Cup000003g003224.1	Cup000001g000145.1	Cup000044g030477.1					Cup000001g000145.1
Cup000005g005307.A	0	0	0	0	0	0	0	0				Cup001698g045890.1	Cup000029g023514.1	Cup000006g006260.1					Cup000029g023514.1
Cup000005g005313.A	0	0	0	0	0	0	0	0				Cup000003g002823.1	Cup000066g035559.1	Cup000030g024167.A					Cup000066g035559.1
Cup000005g005320.A	0	0	0	0	0	0	0	0				Cup000005g004991.1	Cup000061g034647.1	Cup000016g015507.1					Cup000061g034647.1
Cup000005g005327.A	0	0	0	0	0	0	0	0				Cup000010g010718.1	Cup000013g013518.A	Cup000004g003934.1					Cup000013g013518.A
Cup000005g005328.A	0	0	0	0	0	0	0	0				Cup000009g009965.1	Cup004038g046606.1	Cup000023g020334.1					Cup004038g046606.1
Cup000005g005337.A	0	0	0	0	0	0	0	0				Cup000007g007763.1	Cup000022g020140.A	Cup000039g028266.1					Cup000022g020140.A
Cup000005g005350.1	0	0	0	0	0	0	0	0				Cup000030g024278.1	Cup000018g017167.1	Cup000016g015561.A					Cup000018g017167.1
Cup000005g005360.A	0	0	0	0	0	0	0	0				Cup000002g001486.A	Cup000005g005204.1	Cup000005g005665.1					Cup000005g005204.1
Cup000005g005363.A	0	0	0	0	0	0	0	0				Cup000004g004340.A	Cup000020g018530.A	Cup000001g001004.1					Cup000020g018530.A
Cup000005g005364.A	0	0	0	0	0	0	0	0				Cup000104g039741.A	Cup000017g016643.1	Cup000002g002238.1					Cup000017g016643.1
Cup000005g005372.A	0	0	0	0	0	0	0	0				Cup000044g030198.1	Cup000007g007057.1	Cup000084g037641.1					Cup000007g007057.1
Cup000005g005377.A	0	0	0	0	0	0	0	0				Cup000035g026975.1	Cup000025g021461.1	Cup000048g031650.1					Cup000025g021461.1
Cup000005g005379.A	0	0	0	0	0	0	0	0				Cup000196g043269.1	Cup000051g032368.1	Cup000011g011830.A					Cup000051g032368.1
Cup000005g005386.A	0	0	0	0	0	0	0	0				Cup000006g006084.1	Cup000048g031849.1	Cup000001g000129.1					Cup000048g031849.1
Cup000005g005388.A	0	0	0	0	0	0	0	0				Cup000007g007138.1	Cup000010g010882.1	Cup000042g029506.1					Cup000010g010882.1
Cup000005g005390.1	0	0	0	0	0	0	0	0				Cup000007g007055.1	Cup000065g035358.A	Cup000103g039591.A					Cup000065g035358.A
Cup000005g005417.A	0	0	0	0	0	0	0	0				Cup000055g033504.1	Cup000003g003128.1	Cup000044g030256.1					Cup000003g003128.1
Cup000005g005420.A	0	0	0	0	0	0	0	0				Cup000010g010361.1	Cup000013g013234.1	Cup000097g039142.A					Cup000013g013234.1
Cup000005g005421.A	0	0	0	0	0	0	0	0				Cup000077g036985.1	Cup000066g035676.A	Cup000033g025981.A					Cup000066g035676.A
Cup000005g005425.A	0	0	0	0	0	0	0	0				Cup000037g027506.1	Cup000007g007856.1	Cup000035g026683.1					Cup000007g007856.1
Cup000005g005470.A	0	0	0	0	0	0	0	0				Cup000009g009861.1	Cup000055g033553.1	Cup000004g003974.1					Cup000055g033553.1
Cup000005g005471.A	0	0	0	0	0	0	0	0				Cup000010g011019.A	Cup000002g001594.1	Cup000013g013197.1					Cup000002g001594.1
Cup000005g005479.A	0	0	0	0	0	0	0	0				Cup000040g028797.1	Cup000013g013064.A	Cup000037g027508.1					Cup000013g013064.A
Cup000005g005485.A	0	0	0	0	0	0	0	0				Cup000004g004409.1	Cup000023g020497.1	Cup000056g033858.1					Cup000023g020497.1
Cup000005g005507.1	0	0	0	0	0	0	0	0				Cup000160g042293.1	Cup000007g007753.1	Cup000093g038725.1					Cup000007g007753.1
Cup000005g005510.A	0	0	0	0	0	0	0	0				Cup000014g014218.1	Cup000016g015485.1	Cup000041g029039.1					Cup000016g015485.1
Cup000005g005514.A	0	0	0	0	0	0	0	0				Cup000092g038540.1	Cup000033g026129.1	Cup000002g002173.1					Cup000033g026129.1
Cup000005g005516.A	0	0	0	0	0	0	0	0				Cup000007g007859.1	Cup000106g039946.A	Cup000022g020073.A					Cup000106g039946.A
Cup000005g005528.1	0	0	0	0	0	0	0	0				Cup000026g022212.1	Cup000032g025170.A	Cup000073g036580.1					Cup000032g025170.A
Cup000005g005571.A	0	0	0	0	0	0	0	0				Cup000035g026546.1	Cup000060g034346.1	Cup000008g008742.1					Cup000060g034346.1
Cup000005g005578.A	0	0	0	0	0	0	0	0				Cup000040g028857.1	Cup000013g013231.1	Cup000132g041171.1					Cup000013g013231.1
Cup000005g005579.A	0	0	0	0	0	0	0	0				Cup000072g036480.1	Cup000040g028874.1	Cup000035g026953.1					Cup000040g028874.1
Cup000005g005586.1	0	0	0	0	0	0	0	0				Cup000006g006051.1	Cup000096g039081.1	Cup000169g042655.1					Cup000096g039081.1
Cup000005g005591.1	0	0	0	0	0	0	0	0				Cup000056g033682.1	Cup000052g032901.A	Cup000085g037848.1					Cup000052g032901.A
Cup000005g005603.1	0	0	0	0	0	0	0	0				Cup000013g013832.1	Cup000034g026379.1	Cup000034g026403.1					Cup000034g026379.1
Cup000005g005620.1	0	0	0	0	0	0	0	0				Cup000016g015433.1	Cup000012g012227.1	Cup000009g009300.A					Cup000012g012227.1
Cup000005g005621.1	0	0	0	0	0	0	0	0				Cup000004g004637.1	Cup000117g040505.1	Cup000018g017572.1					Cup000117g040505.1
Cup000005g005628.A	0	0	0	0	0	0	0	0				Cup010122g047077.A	Cup000042g029749.1	Cup000006g006960.A					Cup000042g029749.1
Cup000005g005629.1	0	0	0	0	0	0	0	0				Cup000091g038373.A	Cup000010g010295.1	Cup000083g037451.1					Cup000010g010295.1
Cup000005g005630.1	0	0	0	0	0	0	0	0				Cup000005g005647.A	Cup000133g041202.1	Cup000034g026385.1					Cup000133g041202.1
Cup000005g005642.1	0	0	0	0	0	0	0	0				Cup000031g024571.1	Cup000018g017235.1	Cup000054g033394.1					Cup000018g017235.1
Cup000005g005653.1	0	0	0	0	0	0	0	0				Cup000005g005149.1	Cup000075g036799.1	Cup002708g046326.1					Cup000075g036799.1
Cup000005g005669.A	0	0	0	0	0	0	0	0				Cup000026g022348.1	Cup000014g014631.1	Cup000012g012841.1					Cup000014g014631.1
Cup000005g005676.A	0	0	0	0	0	0	0	0				Cup000002g002445.A	Cup000071g036291.1	Cup000083g037446.1					Cup000071g036291.1
Cup000005g005700.A	0	0	0	0	0	0	0	0				Cup000006g006153.A	Cup000014g014116.1	Cup000013g013896.1					Cup000014g014116.1
Cup000005g005701.A	0	0	0	0	0	0	0	0				Cup000026g022064.1	Cup000004g004370.1	Cup000038g028030.1					Cup000004g004370.1
Cup000005g005734.A	0	0	0	0	0	0	0	0				Cup000040g028741.1	Cup000026g022236.1	Cup000010g010726.1					Cup000026g022236.1
Cup000005g005752.1	0	0	0	0	0	0	0	0				Cup000074g036674.1	Cup000055g033552.A	Cup000040g028825.A					Cup000055g033552.A
Cup000005g005808.A	0	0	0	0	0	0	0	0				Cup000001g000292.1	Cup000035g026936.A	Cup000004g004260.1					Cup000035g026936.A
Cup000005g005816.A	0	0	0	0	0	0	0	0				Cup000071g036365.1	Cup000029g023796.1	Cup000042g029660.1					Cup000029g023796.1
Cup000005g005826.A	0	0	0	0	0	0	0	0				Cup000030g024275.1	Cup000049g031992.1	Cup000020g018448.1					Cup000049g031992.1
Cup000005g005830.1	0	0	0	0	0	0	0	0				Cup000030g024119.1	Cup000096g039027.1	Cup000029g023375.1					Cup000096g039027.1
Cup000005g005832.1	0	0	0	0	0	0	0	0				Cup000019g018195.1	Cup000055g033500.1	Cup000007g007671.1					Cup000055g033500.1
Cup000005g005839.1	0	0	0	0	0	0	0	0				Cup000012g012299.1	Cup000065g035502.1	Cup000008g008301.1					Cup000065g035502.1
Cup000005g005843.A	0	0	0	0	0	0	0	0				Cup000013g013193.1	Cup000063g035085.1	Cup000024g020798.1					Cup000063g035085.1
Cup000005g005844.1	0	0	0	0	0	0	0	0				Cup000026g022224.1	Cup000055g033453.1	Cup000021g019490.1					Cup000055g033453.1
Cup000005g005853.1	0	0	0	0	0	0	0	0				Cup000069g036060.1	Cup000017g016850.1	Cup000001g000846.1					Cup000017g016850.1
Cup000005g005865.A	0	0	0	0	0	0	0	0				Cup000035g026601.1	Cup000029g023367.1	Cup000024g021051.1					Cup000029g023367.1
Cup000005g005871.A	0	0	0	0	0	0	0	0				Cup000251g043798.1	Cup000016g015879.A	Cup000297g044083.A					Cup000016g015879.A
Cup000005g005872.1	0	0	0	0	0	0	0	0				Cup000032g025343.A	Cup000044g030152.1	Cup000035g026605.1					Cup000044g030152.1
Cup000005g005877.A	0	0	0	0	0	0	0	0				Cup008747g047006.A	Cup000007g007962.A	Cup000062g034951.1					Cup000007g007962.A
Cup000005g005881.1	0	0	0	0	0	0	0	0				Cup000065g035473.1	Cup000004g004411.1	Cup000037g027513.1					Cup000004g004411.1
Cup000005g005890.1	0	0	0	0	0	0	0	0				Cup000039g028397.1	Cup000104g039715.1	Cup000009g009699.1					Cup000104g039715.1
Cup000005g005892.1	0	0	0	0	0	0	0	0				Cup001566g045800.1	Cup000032g025146.1	Cup000005g005027.A					Cup000032g025146.1
Cup000005g005893.A	0	0	0	0	0	0	0	0				Cup000032g025437.1	Cup000051g032410.1	Cup000023g020562.1					Cup000051g032410.1
Cup000005g005899.A	0	0	0	0	0	0	0	0				Cup000028g023129.A	Cup000042g029563.1	Cup000106g039953.1					Cup000042g029563.1
Cup000005g005909.1	0	0	0	0	0	0	0	0				Cup000001g000285.1	Cup000066g035578.A	Cup000034g026210.1					Cup000066g035578.A
Cup000005g005911.A	0	0	0	0	0	0	0	0				Cup000026g022198.A	Cup000072g036477.1	Cup000033g025923.1					Cup000072g036477.1
Cup000005g005921.A	0	0	0	0	0	0	0	0				Cup000125g040886.1	Cup000006g006354.1	Cup000032g025138.A					Cup000006g006354.1
Cup000005g005926.1	0	0	0	0	0	0	0	0				Cup000004g004387.1	Cup000007g007208.1	Cup000057g034024.1					Cup000007g007208.1
Cup000005g005929.A	0	0	0	0	0	0	0	0				Cup000012g012712.1	Cup000063g035093.1	Cup000083g037508.1					Cup000063g035093.1
Cup000005g005931.1	0	0	0	0	0	0	0	0				Cup000110g040239.1	Cup000007g007046.1	Cup000009g009864.1					Cup000007g007046.1
Cup000005g005932.1	0	0	0	0	0	0	0	0				Cup000060g034475.A	Cup000019g017929.1	Cup000024g020835.A					Cup000019g017929.1
Cup000005g005934.A	0	0	0	0	0	0	0	0				Cup000017g016434.1	Cup000019g018234.A	Cup000158g042227.A					Cup000019g018234.A
Cup000005g005939.A	0	0	0	0	0	0	0	0				Cup000031g024685.1	Cup000128g040982.1	Cup000030g024402.1					Cup000128g040982.1
Cup000005g005940.1	0	0	0	0	0	0	0	0				Cup000140g041501.1	Cup000195g043221.1	Cup000140g041499.1					Cup000195g043221.1
Cup000005g005945.1	0	0	0	0	0	0	0	0				Cup000004g003971.1	Cup000022g019683.1	Cup000019g018000.A					Cup000022g019683.1
Cup000005g005947.A	0	0	0	0	0	0	0	0				Cup000153g042100.1	Cup000003g002715.1	Cup000056g033746.1					Cup000003g002715.1
Cup000005g005960.A	0	0	0	0	0	0	0	0				Cup000006g006115.1	Cup000005g005144.1	Cup000083g037427.1					Cup000005g005144.1
Cup000005g005966.A	0	0	0	0	0	0	0	0				Cup000023g020482.1	Cup000010g010269.1	Cup000025g021602.A					Cup000010g010269.1
Cup000005g005968.A	0	0	0	0	0	0	0	0				Cup000026g022038.1	Cup000010g010249.1	Cup000035g026994.1					Cup000010g010249.1
Cup000005g005970.A	0	0	0	0	0	0	0	0				Cup000015g014939.1	Cup000023g020561.1	Cup000023g020372.1					Cup000023g020561.1
Cup000005g005977.1	0	0	0	0	0	0	0	0				Cup000003g003414.1	Cup000118g040561.1	Cup000016g015472.1					Cup000118g040561.1
Cup000005g005981.A	0	0	0	0	0	0	0	0				Cup000007g007557.1	Cup000003g003463.1	Cup000054g033380.1					Cup000003g003463.1
Cup000005g005988.A	0	0	0	0	0	0	0	0				Cup000496g044750.1	Cup000043g030075.1	Cup000004g003766.1					Cup000043g030075.1
Cup000005g005989.A	0	0	0	0	0	0	0	0				Cup000006g006095.1	Cup000450g044602.A	Cup000001g001001.A					Cup000450g044602.A
Cup000005g005992.A	0	0	0	0	0	0	0	0				Cup000010g010767.1	Cup000029g023720.1	Cup000046g031265.1					Cup000029g023720.1
Cup000005g005997.A	0	0	0	0	0	0	0	0				Cup000010g010442.1	Cup000052g032979.1	Cup000017g016360.1					Cup000052g032979.1
Cup000005g005998.A	0	0	0	0	0	0	0	0				Cup000030g023989.1	Cup000002g002511.A	Cup001936g046025.1					Cup000002g002511.A
Cup000005g006000.A	0	0	0	0	0	0	0	0				Cup000018g017278.1	Cup000006g006774.1	Cup000035g026962.A					Cup000006g006774.1
Cup000005g006010.A	0	0	0	0	0	0	0	0				Cup000011g011803.1	Cup000009g009764.A	Cup000019g018089.1					Cup000009g009764.A
Cup000005g006012.1	0	0	0	0	0	0	0	0				Cup000011g011359.1	Cup000034g026285.A	Cup000004g003664.1					Cup000034g026285.A
Cup000005g006013.1	0	0	0	0	0	0	0	0				Cup000044g030159.A	Cup000032g025439.1	Cup000033g025724.1					Cup000032g025439.1
Cup000005g006016.A	0	0	0	0	0	0	0	0				Cup000032g025106.1	Cup000038g027956.1	Cup000034g026410.1					Cup000038g027956.1
Cup000005g006020.1	0	0	0	0	0	0	0	0				Cup000004g004129.A	Cup000026g022293.1	Cup000012g012222.A					Cup000026g022293.1
Cup000005g006021.A	0	0	0	0	0	0	0	0				Cup000052g032754.1	Cup000054g033392.1	Cup000001g000065.1					Cup000054g033392.1
Cup000005g006029.A	0	0	0	0	0	0	0	0				Cup000019g017837.1	Cup000162g042368.1	Cup000013g013667.1					Cup000162g042368.1
Cup000006g006043.A	0	0	0	0	0	0	0	0				Cup000004g003748.1	Cup000007g007245.1	Cup000029g023675.A					Cup000007g007245.1
Cup000006g006052.1	0	0	0	0	0	0	0	0				Cup000008g008610.1	Cup000018g017155.1	Cup000005g005797.1					Cup000018g017155.1
Cup000006g006059.A	0	0	0	0	0	0	0	0				Cup000010g010485.1	Cup000007g007833.1	Cup000040g028558.1					Cup000007g007833.1
Cup000006g006060.A	0	0	0	0	0	0	0	0				Cup000027g022708.1	Cup000120g040660.A	Cup000004g004359.A					Cup000120g040660.A
Cup000006g006097.A	0	0	0	0	0	0	0	0				Cup000015g015263.1	Cup000005g005749.1	Cup000027g022509.1					Cup000005g005749.1
Cup000006g006107.A	0	0	0	0	0	0	0	0				Cup000104g039717.1	Cup000023g020284.1	Cup000009g009219.1					Cup000023g020284.1
Cup000006g006118.1	0	0	0	0	0	0	0	0				Cup000050g032288.A	Cup000023g020336.A	Cup000014g014230.1					Cup000023g020336.A
Cup000006g006127.1	0	0	0	0	0	0	0	0				Cup000034g026425.1	Cup000169g042623.1	Cup000025g021712.1					Cup000169g042623.1
Cup000006g006128.1	0	0	0	0	0	0	0	0				Cup000024g021236.A	Cup000092g038569.A	Cup000055g033573.1					Cup000092g038569.A
Cup000006g006135.A	0	0	0	0	0	0	0	0				Cup000024g021003.A	Cup000109g040213.1	Cup000016g015611.1					Cup000109g040213.1
Cup000006g006141.1	0	0	0	0	0	0	0	0				Cup000025g021411.1	Cup000013g013681.1	Cup000038g027691.1					Cup000013g013681.1
Cup000006g006142.1	0	0	0	0	0	0	0	0				Cup000154g042129.1	Cup000016g015875.1	Cup000007g007824.1					Cup000016g015875.1
Cup000006g006188.A	0	0	0	0	0	0	0	0				Cup000007g007615.1	Cup000142g041572.1	Cup000068g036004.A					Cup000142g041572.1
Cup000006g006190.A	0	0	0	0	0	0	0	0				Cup000066g035565.1	Cup000010g010961.1	Cup001165g045585.1					Cup000010g010961.1
Cup000006g006234.A	0	0	0	0	0	0	0	0				Cup000027g022630.1	Cup000025g021691.1	Cup000002g001638.1					Cup000025g021691.1
Cup000006g006246.A	0	0	0	0	0	0	0	0				Cup000014g014618.1	Cup000002g001753.1	Cup000143g041654.1					Cup000002g001753.1
Cup000006g006249.A	0	0	0	0	0	0	0	0				Cup000012g012830.1	Cup000008g008074.1	Cup000004g004320.1					Cup000008g008074.1
Cup000006g006310.1	0	0	0	0	0	0	0	0				Cup000028g023216.1	Cup000853g045304.1	Cup000091g038324.1					Cup000853g045304.1
Cup000006g006311.A	0	0	0	0	0	0	0	0				Cup000033g025941.1	Cup000642g044990.1	Cup000003g002705.1					Cup000642g044990.1
Cup000006g006331.A	0	0	0	0	0	0	0	0				Cup000052g032747.1	Cup000007g007767.1	Cup000033g025906.1					Cup000007g007767.1
Cup000006g006341.A	0	0	0	0	0	0	0	0				Cup000093g038716.1	Cup000031g024910.1	Cup000097g039203.1					Cup000031g024910.1
Cup000006g006342.A	0	0	0	0	0	0	0	0				Cup000037g027264.1	Cup000026g021970.1	Cup000051g032416.A					Cup000026g021970.1
Cup000006g006345.A	0	0	0	0	0	0	0	0				Cup000008g008354.1	Cup000001g000816.1	Cup000019g018214.1					Cup000001g000816.1
Cup000006g006359.1	0	0	0	0	0	0	0	0				Cup000025g021685.1	Cup002945g046407.1	Cup000091g038445.1					Cup002945g046407.1
Cup000006g006364.A	0	0	0	0	0	0	0	0				Cup000008g008058.A	Cup000005g005868.1	Cup000352g044299.1					Cup000005g005868.1
Cup000006g006365.A	0	0	0	0	0	0	0	0				Cup000016g016174.1	Cup000025g021314.1	Cup000007g007683.1					Cup000025g021314.1
Cup000006g006373.1	0	0	0	0	0	0	0	0				Cup000020g018572.1	Cup000027g022644.A	Cup000030g024003.1					Cup000027g022644.A
Cup000006g006374.1	0	0	0	0	0	0	0	0				Cup000066g035690.A	Cup000041g029211.1	Cup000029g023424.1					Cup000041g029211.1
Cup000006g006375.A	0	0	0	0	0	0	0	0				Cup000027g022756.1	Cup000024g021104.1	Cup000046g031045.1					Cup000024g021104.1
Cup000006g006384.A	0	0	0	0	0	0	0	0				Cup000013g013695.1	Cup000031g024554.1	Cup000103g039662.1					Cup000031g024554.1
Cup000006g006385.A	0	0	0	0	0	0	0	0				Cup000092g038505.A	Cup000041g029258.1	Cup000032g025468.A					Cup000041g029258.1
Cup000006g006389.A	0	0	0	0	0	0	0	0				Cup000030g024123.1	Cup000005g005087.1	Cup000018g017249.1					Cup000005g005087.1
Cup000006g006400.A	0	0	0	0	0	0	0	0				Cup000022g019692.1	Cup000004g004346.A	Cup000010g010805.1					Cup000004g004346.A
Cup000006g006401.A	0	0	0	0	0	0	0	0				Cup000037g027536.1	Cup000013g013132.1	Cup000010g010346.1					Cup000013g013132.1
Cup000006g006410.A	0	0	0	0	0	0	0	0				Cup000144g041756.A	Cup000006g006203.1	Cup000028g023026.1					Cup000006g006203.1
Cup000006g006420.A	0	0	0	0	0	0	0	0				Cup000004g004836.A	Cup000020g018560.A	Cup000005g005031.1					Cup000020g018560.A
Cup000006g006423.1	0	0	0	0	0	0	0	0				Cup000086g037986.A	Cup001702g045891.1	Cup000054g033255.A					Cup001702g045891.1
Cup000006g006432.A	0	0	0	0	0	0	0	0				Cup000008g008606.1	Cup000010g010713.1	Cup000013g013128.1					Cup000010g010713.1
Cup000006g006437.A	0	0	0	0	0	0	0	0				Cup000019g017787.1	Cup000016g016005.1	Cup000036g027181.1					Cup000016g016005.1
Cup000006g006447.1	0	0	0	0	0	0	0	0				Cup000032g025345.1	Cup000016g015590.1	Cup000002g002052.1					Cup000016g015590.1
Cup000006g006451.A	0	0	0	0	0	0	0	0				Cup000017g016736.1	Cup000003g002852.1	Cup000011g011912.1					Cup000003g002852.1
Cup000006g006467.A	0	0	0	0	0	0	0	0				Cup000028g022961.1	Cup000061g034773.1	Cup009126g047027.A					Cup000061g034773.1
Cup000006g006469.1	0	0	0	0	0	0	0	0				Cup000004g003899.1	Cup000008g008224.1	Cup000023g020451.1					Cup000008g008224.1
Cup000006g006472.A	0	0	0	0	0	0	0	0				Cup000049g032014.1	Cup000003g003138.1	Cup000055g033509.1					Cup000003g003138.1
Cup000006g006476.1	0	0	0	0	0	0	0	0				Cup000038g028063.1	Cup000048g031790.1	Cup000004g003827.1					Cup000048g031790.1
Cup000006g006484.1	0	0	0	0	0	0	0	0				Cup000054g033416.1	Cup000097g039208.A	Cup000034g026330.1					Cup000097g039208.A
Cup000006g006485.A	0	0	0	0	0	0	0	0				Cup000029g023494.1	Cup000022g019688.1	Cup000162g042389.1					Cup000022g019688.1
Cup000006g006488.A	0	0	0	0	0	0	0	0				Cup000055g033565.1	Cup000014g014222.1	Cup000168g042520.1					Cup000014g014222.1
Cup000006g006490.A	0	0	0	0	0	0	0	0				Cup000098g039250.1	Cup000034g026464.A	Cup000271g043964.1					Cup000034g026464.A
Cup000006g006499.1	0	0	0	0	0	0	0	0				Cup000054g033366.1	Cup000001g000328.1	Cup000023g020338.1					Cup000001g000328.1
Cup000006g006500.1	0	0	0	0	0	0	0	0				Cup000005g005202.1	Cup000012g012676.1	Cup001233g045637.1					Cup000012g012676.1
Cup000006g006525.A	0	0	0	0	0	0	0	0				Cup000001g000407.1	Cup000094g038836.A	Cup000025g021664.1					Cup000094g038836.A
Cup000006g006534.1	0	0	0	0	0	0	0	0				Cup001051g045491.1	Cup000033g025982.1	Cup000026g022312.1					Cup000033g025982.1
Cup000006g006547.1	0	0	0	0	0	0	0	0				Cup000450g044601.1	Cup000235g043669.1	Cup000006g006304.A					Cup000235g043669.1
Cup000006g006553.A	0	0	0	0	0	0	0	0				Cup000065g035466.1	Cup000011g011982.1	Cup000087g038094.1					Cup000011g011982.1
Cup000006g006558.A	0	0	0	0	0	0	0	0				Cup000016g015921.1	Cup000026g021953.1	Cup000013g013712.1					Cup000026g021953.1
Cup000006g006580.1	0	0	0	0	0	0	0	0				Cup000012g012421.1	Cup000038g028059.A	Cup000032g025134.1					Cup000038g028059.A
Cup000006g006582.1	0	0	0	0	0	0	0	0				Cup000017g016301.1	Cup000004g004336.1	Cup000013g013794.1					Cup000004g004336.1
Cup000006g006586.1	0	0	0	0	0	0	0	0				Cup000018g017108.1	Cup000056g033713.1	Cup000006g006824.1					Cup000056g033713.1
Cup000006g006599.1	0	0	0	0	0	0	0	0				Cup000003g002757.1	Cup000013g013707.1	Cup000080g037249.1					Cup000013g013707.1
Cup000006g006601.A	0	0	0	0	0	0	0	0				Cup000267g043915.1	Cup000042g029502.1	Cup000122g040725.1					Cup000042g029502.1
Cup000006g006622.1	0	0	0	0	0	0	0	0				Cup000023g020297.1	Cup000014g014133.A	Cup000003g002889.1					Cup000014g014133.A
Cup000006g006624.1	0	0	0	0	0	0	0	0				Cup000169g042622.1	Cup000021g019413.1	Cup000028g023240.1					Cup000021g019413.1
Cup000006g006686.A	0	0	0	0	0	0	0	0				Cup000030g024440.1	Cup000145g041785.1	Cup000013g013133.1					Cup000145g041785.1
Cup000006g006705.1	0	0	0	0	0	0	0	0				Cup000035g026857.1	Cup000007g007845.1	Cup000011g011207.1					Cup000007g007845.1
Cup000006g006713.1	0	0	0	0	0	0	0	0				Cup000050g032304.A	Cup000029g023474.1	Cup000009g009835.1					Cup000029g023474.1
Cup000006g006716.A	0	0	0	0	0	0	0	0				Cup000094g038819.1	Cup000070g036250.1	Cup000048g031792.1					Cup000070g036250.1
Cup000006g006737.1	0	0	0	0	0	0	0	0				Cup000023g020547.1	Cup000016g015524.1	Cup000003g002920.1					Cup000016g015524.1
Cup000006g006778.1	0	0	0	0	0	0	0	0				Cup000117g040523.A	Cup000027g022642.1	Cup000271g043950.1					Cup000027g022642.1
Cup000006g006789.A	0	0	0	0	0	0	0	0				Cup000197g043287.1	Cup000043g029913.1	Cup000009g009649.1					Cup000043g029913.1
Cup000006g006797.1	0	0	0	0	0	0	0	0				Cup000052g032852.A	Cup000055g033487.1	Cup000008g008345.1					Cup000055g033487.1
Cup000006g006837.A	0	0	0	0	0	0	0	0				Cup000010g010860.1	Cup000026g022450.1	Cup000097g039124.1					Cup000026g022450.1
Cup000006g006841.1	0	0	0	0	0	0	0	0				Cup000013g013652.1	Cup000004g004299.A	Cup000098g039264.1					Cup000004g004299.A
Cup000006g006845.A	0	0	0	0	0	0	0	0				Cup000032g025364.1	Cup000026g022496.1	Cup000011g011833.1					Cup000026g022496.1
Cup000006g006846.1	0	0	0	0	0	0	0	0				Cup000008g008064.1	Cup000010g010297.1	Cup000016g015565.1					Cup000010g010297.1
Cup000006g006863.A	0	0	0	0	0	0	0	0				Cup000005g005096.1	Cup000031g024823.1	Cup000003g003224.1					Cup000031g024823.1
Cup000006g006868.1	0	0	0	0	0	0	0	0				Cup000015g014940.1	Cup000003g003182.1	Cup000016g015609.1					Cup000003g003182.1
Cup000006g006869.1	0	0	0	0	0	0	0	0				Cup000002g002145.1	Cup000438g044566.1	Cup000070g036254.A					Cup000438g044566.1
Cup000006g006871.1	0	0	0	0	0	0	0	0				Cup000053g033192.1	Cup000146g041801.1	Cup001698g045890.1					Cup000146g041801.1
Cup000006g006878.A	0	0	0	0	0	0	0	0				Cup000009g009536.A	Cup000040g028850.1	Cup000015g015229.1					Cup000040g028850.1
Cup000006g006884.1	0	0	0	0	0	0	0	0				Cup000005g005572.A	Cup000092g038536.1	Cup000003g002823.1					Cup000092g038536.1
Cup000006g006888.A	0	0	0	0	0	0	0	0				Cup000013g013293.1	Cup000074g036727.1	Cup000005g004991.1					Cup000074g036727.1
Cup000006g006900.1	0	0	0	0	0	0	0	0				Cup000042g029538.1	Cup000001g000097.1	Cup000010g010718.1					Cup000001g000097.1
Cup000006g006903.A	0	0	0	0	0	0	0	0				Cup000038g027650.1	Cup000015g015199.1	Cup000009g009965.1					Cup000015g015199.1
Cup000006g006908.A	0	0	0	0	0	0	0	0				Cup000005g005538.1	Cup000011g011930.1	Cup000007g007763.1					Cup000011g011930.1
Cup000006g006912.A	0	0	0	0	0	0	0	0				Cup000016g015674.1	Cup000018g017552.1	Cup000030g024278.1					Cup000018g017552.1
Cup000006g006926.1	0	0	0	0	0	0	0	0				Cup000006g006655.1	Cup000007g007625.A	Cup000002g001486.A					Cup000007g007625.A
Cup000006g006939.A	0	0	0	0	0	0	0	0				Cup000031g024704.1	Cup000804g045231.1	Cup000004g004340.A					Cup000804g045231.1
Cup000006g006953.1	0	0	0	0	0	0	0	0				Cup000015g015177.1	Cup000305g044109.1	Cup000104g039741.A					Cup000305g044109.1
Cup000006g006956.A	0	0	0	0	0	0	0	0				Cup000013g013882.1	Cup000066g035640.1	Cup000044g030198.1					Cup000066g035640.1
Cup000006g006965.1	0	0	0	0	0	0	0	0				Cup000017g016313.1	Cup000037g027566.A	Cup000035g026975.1					Cup000037g027566.A
Cup000006g006968.A	0	0	0	0	0	0	0	0				Cup000010g011141.1	Cup000008g008242.1	Cup000196g043269.1					Cup000008g008242.1
Cup000006g006969.A	0	0	0	0	0	0	0	0				Cup000004g004632.1	Cup000013g013743.1	Cup000006g006084.1					Cup000013g013743.1
Cup000006g006970.1	0	0	0	0	0	0	0	0				Cup000050g032233.A	Cup000021g019401.1	Cup000007g007138.1					Cup000021g019401.1
Cup000006g006971.A	0	0	0	0	0	0	0	0				Cup000058g034162.1	Cup000026g022051.1	Cup000013g013316.1					Cup000026g022051.1
Cup000006g006973.1	0	0	0	0	0	0	0	0				Cup000046g031013.1	Cup000001g000050.1	Cup000007g007055.1					Cup000001g000050.1
Cup000006g006977.1	0	0	0	0	0	0	0	0				Cup000074g036736.1	Cup000016g015819.1	Cup000055g033504.1					Cup000016g015819.1
Cup000006g006986.A	0	0	0	0	0	0	0	0				Cup000017g016219.A	Cup000004g003828.1	Cup000010g010361.1					Cup000004g003828.1
Cup000006g006994.1	0	0	0	0	0	0	0	0				Cup000001g001285.1	Cup000088g038153.A	Cup000077g036985.1					Cup000088g038153.A
Cup000006g006997.A	0	0	0	0	0	0	0	0				Cup000014g014274.1	Cup000013g013143.1	Cup000037g027506.1					Cup000013g013143.1
Cup000006g007012.1	0	0	0	0	0	0	0	0				Cup000020g018462.1	Cup000077g036957.A	Cup000009g009861.1					Cup000077g036957.A
Cup000006g007016.A	0	0	0	0	0	0	0	0				Cup000002g002266.1	Cup000091g038416.1	Cup000010g011019.A					Cup000091g038416.1
Cup000006g007023.1	0	0	0	0	0	0	0	0				Cup000003g002893.1	Cup000072g036395.1	Cup000040g028797.1					Cup000072g036395.1
Cup000007g007029.A	0	0	0	0	0	0	0	0				Cup000150g041940.1	Cup003086g046436.1	Cup000004g004409.1					Cup003086g046436.1
Cup000007g007105.1	0	0	0	0	0	0	0	0				Cup000003g003300.1	Cup000044g030570.1	Cup000160g042293.1					Cup000044g030570.1
Cup000007g007119.A	0	0	0	0	0	0	0	0				Cup000023g020239.1	Cup000022g019786.1	Cup000014g014218.1					Cup000022g019786.1
Cup000007g007129.1	0	0	0	0	0	0	0	0				Cup000043g030029.1	Cup000008g008082.1	Cup000092g038540.1					Cup000008g008082.1
Cup000007g007140.A	0	0	0	0	0	0	0	0				Cup000004g003782.1	Cup000024g020769.1	Cup000007g007859.1					Cup000024g020769.1
Cup000007g007145.A	0	0	0	0	0	0	0	0				Cup000023g020407.A	Cup000017g016766.A	Cup000026g022212.1					Cup000017g016766.A
Cup000007g007149.1	0	0	0	0	0	0	0	0				Cup000020g018420.1	Cup000103g039613.1	Cup000043g030110.A					Cup000103g039613.1
Cup000007g007171.1	0	0	0	0	0	0	0	0				Cup000006g006638.1	Cup000009g009516.A	Cup000035g026546.1					Cup000009g009516.A
Cup000007g007182.A	0	0	0	0	0	0	0	0				Cup000018g017277.1	Cup000012g012919.1	Cup000040g028857.1					Cup000012g012919.1
Cup000007g007191.A	0	0	0	0	0	0	0	0				Cup000004g003642.1	Cup001532g045788.1	Cup000003g003178.1					Cup001532g045788.1
Cup000007g007211.A	0	0	0	0	0	0	0	0				Cup000002g002160.1	Cup000031g024827.1	Cup000072g036480.1					Cup000031g024827.1
Cup000007g007215.1	0	0	0	0	0	0	0	0				Cup000019g017794.1	Cup000017g016332.1	Cup000006g006051.1					Cup000017g016332.1
Cup000007g007219.A	0	0	0	0	0	0	0	0				Cup000017g016490.1	Cup000026g021941.1	Cup000056g033682.1					Cup000026g021941.1
Cup000007g007225.A	0	0	0	0	0	0	0	0				Cup000005g005979.A	Cup000005g004942.1	Cup000013g013832.1					Cup000005g004942.1
Cup000007g007236.1	0	0	0	0	0	0	0	0				Cup000020g018480.1	Cup000069g036102.1	Cup000016g015433.1					Cup000069g036102.1
Cup000007g007265.A	0	0	0	0	0	0	0	0				Cup000267g043921.A	Cup000035g026596.A	Cup000004g004637.1					Cup000035g026596.A
Cup000007g007282.A	0	0	0	0	0	0	0	0				Cup000014g014779.1	Cup000031g025049.1	Cup010122g047077.A					Cup000031g025049.1
Cup000007g007283.1	0	0	0	0	0	0	0	0				Cup000020g018616.1	Cup000031g024570.A	Cup000089g038239.A					Cup000031g024570.A
Cup000007g007287.1	0	0	0	0	0	0	0	0				Cup000010g010403.1	Cup000023g020468.1	Cup000091g038373.A					Cup000023g020468.1
Cup000007g007289.A	0	0	0	0	0	0	0	0				Cup000037g027510.1	Cup000031g024845.1	Cup000005g005647.A					Cup000031g024845.1
Cup000007g007292.1	0	0	0	0	0	0	0	0				Cup000004g004460.1	Cup000029g023412.1	Cup000031g024571.1					Cup000029g023412.1
Cup000007g007303.1	0	0	0	0	0	0	0	0				Cup000014g014234.1	Cup000041g029034.1	Cup000005g005149.1					Cup000041g029034.1
Cup000007g007320.1	0	0	0	0	0	0	0	0				Cup000055g033474.1	Cup000010g010458.1	Cup000026g022348.1					Cup000010g010458.1
Cup000007g007325.A	0	0	0	0	0	0	0	0				Cup000103g039684.1	Cup000028g023017.1	Cup000002g002445.A					Cup000028g023017.1
Cup000007g007329.A	0	0	0	0	0	0	0	0				Cup000021g019373.1	Cup000008g008349.1	Cup000006g006153.A					Cup000008g008349.1
Cup000007g007331.A	0	0	0	0	0	0	0	0				Cup000030g024219.A	Cup000180g042942.1	Cup000026g022064.1					Cup000180g042942.1
Cup000007g007339.A	0	0	0	0	0	0	0	0				Cup000017g016432.1	Cup000038g027771.1	Cup000022g019808.1					Cup000038g027771.1
Cup000007g007343.1	0	0	0	0	0	0	0	0				Cup000019g018226.1	Cup000031g024810.A	Cup000040g028741.1					Cup000031g024810.A
Cup000007g007354.A	0	0	0	0	0	0	0	0				Cup000013g013765.1	Cup000003g003286.1	Cup000074g036674.1					Cup000003g003286.1
Cup000007g007360.A	0	0	0	0	0	0	0	0				Cup000029g023478.1	Cup000014g014446.1	Cup000001g000292.1					Cup000014g014446.1
Cup000007g007378.1	0	0	0	0	0	0	0	0				Cup000038g027700.1	Cup000144g041742.1	Cup000071g036365.1					Cup000144g041742.1
Cup000007g007387.A	0	0	0	0	0	0	0	0				Cup000143g041673.1	Cup000057g033994.A	Cup000030g024275.1					Cup000057g033994.A
Cup000007g007388.A	0	0	0	0	0	0	0	0				Cup000004g004326.A	Cup000001g000783.1	Cup000030g024119.1					Cup000001g000783.1
Cup000007g007391.A	0	0	0	0	0	0	0	0				Cup000028g022945.1	Cup000001g000862.1	Cup000019g018195.1					Cup000001g000862.1
Cup000007g007394.A	0	0	0	0	0	0	0	0				Cup000047g031419.1	Cup000038g027693.1	Cup000012g012299.1					Cup000038g027693.1
Cup000007g007397.A	0	0	0	0	0	0	0	0				Cup000053g033019.1	Cup000168g042522.A	Cup000013g013193.1					Cup000168g042522.A
Cup000007g007400.1	0	0	0	0	0	0	0	0				Cup000041g029128.A	Cup000005g005303.A	Cup000026g022224.1					Cup000005g005303.A
Cup000007g007405.1	0	0	0	0	0	0	0	0				Cup000056g033720.1	Cup000007g007823.1	Cup000069g036060.1					Cup000007g007823.1
Cup000007g007409.A	0	0	0	0	0	0	0	0				Cup000029g023782.1	Cup000020g018688.A	Cup000035g026601.1					Cup000020g018688.A
Cup000007g007417.1	0	0	0	0	0	0	0	0				Cup000018g017147.1	Cup000159g042275.1	Cup000251g043798.1					Cup000159g042275.1
Cup000007g007429.A	0	0	0	0	0	0	0	0				Cup000270g043944.1	Cup000007g007163.1	Cup000032g025343.A					Cup000007g007163.1
Cup000007g007430.A	0	0	0	0	0	0	0	0				Cup000008g008253.1	Cup000041g029026.1	Cup000007g007831.1					Cup000041g029026.1
Cup000007g007438.1	0	0	0	0	0	0	0	0				Cup000046g031238.1	Cup000063g035045.1	Cup008747g047006.A					Cup000063g035045.1
Cup000007g007439.A	0	0	0	0	0	0	0	0				Cup000009g009592.1	Cup000031g024919.1	Cup000065g035473.1					Cup000031g024919.1
Cup000007g007456.A	0	0	0	0	0	0	0	0				Cup000080g037242.1	Cup000130g041096.1	Cup000083g037595.1					Cup000130g041096.1
Cup000007g007457.A	0	0	0	0	0	0	0	0				Cup000025g021274.1	Cup000007g008025.A	Cup000039g028397.1					Cup000007g008025.A
Cup000007g007460.A	0	0	0	0	0	0	0	0				Cup000038g027973.1	Cup000007g008030.1	Cup001566g045800.1					Cup000007g008030.1
Cup000007g007469.1	0	0	0	0	0	0	0	0				Cup000018g017716.1	Cup000096g039067.1	Cup000032g025437.1					Cup000096g039067.1
Cup000007g007471.A	0	0	0	0	0	0	0	0				Cup000032g025131.1	Cup000025g021676.1	Cup000028g023129.A					Cup000025g021676.1
Cup000007g007476.1	0	0	0	0	0	0	0	0				Cup000036g027133.1	Cup000022g019665.1	Cup000001g000285.1					Cup000022g019665.1
Cup000007g007477.A	0	0	0	0	0	0	0	0				Cup000063g035097.A	Cup000053g033025.1	Cup000026g022198.A					Cup000053g033025.1
Cup000007g007478.1	0	0	0	0	0	0	0	0				Cup000161g042341.1	Cup000091g038442.1	Cup000125g040886.1					Cup000091g038442.1
Cup000007g007485.1	0	0	0	0	0	0	0	0				Cup000001g000520.A	Cup000011g012005.1	Cup000007g007664.1					Cup000011g012005.1
Cup000007g007489.1	0	0	0	0	0	0	0	0				Cup000002g001496.1	Cup000006g006662.1	Cup000004g004387.1					Cup000006g006662.1
Cup000007g007490.A	0	0	0	0	0	0	0	0				Cup000056g033737.1	Cup000011g011807.A	Cup000012g012712.1					Cup000011g011807.A
Cup000007g007509.A	0	0	0	0	0	0	0	0				Cup000043g030009.1	Cup000038g027911.1	Cup000110g040239.1					Cup000038g027911.1
Cup000007g007515.A	0	0	0	0	0	0	0	0				Cup000001g000802.1	Cup000106g039954.1	Cup000060g034475.A					Cup000106g039954.1
Cup000007g007519.1	0	0	0	0	0	0	0	0				Cup000019g018239.1	Cup000016g016034.1	Cup000035g026957.1					Cup000016g016034.1
Cup000007g007520.1	0	0	0	0	0	0	0	0				Cup000011g011473.1	Cup000092g038512.A	Cup000017g016434.1					Cup000092g038512.A
Cup000007g007521.A	0	0	0	0	0	0	0	0				Cup000032g025438.1	Cup000021g019374.1	Cup000031g024685.1					Cup000021g019374.1
Cup000007g007523.A	0	0	0	0	0	0	0	0				Cup000064g035242.1	Cup000012g012711.1	Cup000015g014969.1					Cup000012g012711.1
Cup000007g007526.A	0	0	0	0	0	0	0	0				Cup000005g005467.A	Cup000126g040902.1	Cup000052g032921.1					Cup000126g040902.1
Cup000007g007527.1	0	0	0	0	0	0	0	0				Cup000013g013859.1	Cup000003g003442.1	Cup000140g041501.1					Cup000003g003442.1
Cup000007g007531.A	0	0	0	0	0	0	0	0				Cup000004g003988.1	Cup000040g028515.1	Cup000004g003971.1					Cup000040g028515.1
Cup000007g007535.A	0	0	0	0	0	0	0	0				Cup000027g022506.A	Cup000289g044039.1	Cup000153g042100.1					Cup000289g044039.1
Cup000007g007538.A	0	0	0	0	0	0	0	0				Cup000022g019934.1	Cup000014g014719.1	Cup000006g006115.1					Cup000014g014719.1
Cup000007g007546.A	0	0	0	0	0	0	0	0				Cup000086g037965.A	Cup000020g018577.1	Cup000023g020482.1					Cup000020g018577.1
Cup000007g007547.A	0	0	0	0	0	0	0	0				Cup000003g003199.1	Cup000032g025100.1	Cup000026g022038.1					Cup000032g025100.1
Cup000007g007552.A	0	0	0	0	0	0	0	0				Cup000016g016051.1	Cup000023g020514.1	Cup000015g014939.1					Cup000023g020514.1
Cup000007g007578.1	0	0	0	0	0	0	0	0				Cup000020g018468.A	Cup000026g022049.1	Cup000003g003414.1					Cup000026g022049.1
Cup000007g007586.1	0	0	0	0	0	0	0	0				Cup000045g030672.1	Cup000016g016148.A	Cup000007g007557.1					Cup000016g016148.A
Cup000007g007593.1	0	0	0	0	0	0	0	0				Cup000051g032435.1	Cup000007g007093.1	Cup000713g045109.1					Cup000007g007093.1
Cup000007g007675.A	0	0	0	0	0	0	0	0				Cup000001g000809.1	Cup000003g003313.1	Cup000496g044750.1					Cup000003g003313.1
Cup000007g007678.1	0	0	0	0	0	0	0	0				Cup000017g016386.1	Cup000003g002593.1	Cup000006g006095.1					Cup000003g002593.1
Cup000007g007713.1	0	0	0	0	0	0	0	0				Cup000047g031556.1	Cup000062g034958.1	Cup000010g010767.1					Cup000062g034958.1
Cup000007g007741.A	0	0	0	0	0	0	0	0				Cup000027g022657.1	Cup000020g018544.1	Cup000010g010442.1					Cup000020g018544.1
Cup000007g007746.A	0	0	0	0	0	0	0	0				Cup000091g038358.1	Cup000065g035443.1	Cup000024g020742.1					Cup000065g035443.1
Cup000007g007764.1	0	0	0	0	0	0	0	0				Cup000013g013889.1	Cup000126g040904.1	Cup000030g023989.1					Cup000126g040904.1
Cup000007g007765.1	0	0	0	0	0	0	0	0				Cup000026g021910.1	Cup000035g027040.A	Cup000018g017278.1					Cup000035g027040.A
Cup000007g007794.A	0	0	0	0	0	0	0	0				Cup000074g036637.1	Cup000150g041978.1	Cup000011g011803.1					Cup000150g041978.1
Cup000007g007798.A	0	0	0	0	0	0	0	0				Cup000007g007278.1	Cup000005g004956.1	Cup000011g011359.1					Cup000005g004956.1
Cup000007g007837.A	0	0	0	0	0	0	0	0				Cup000005g005125.1	Cup000038g028052.1	Cup000044g030159.A					Cup000038g028052.1
Cup000007g007870.1	0	0	0	0	0	0	0	0				Cup000014g014698.1	Cup000043g029858.1	Cup000032g025106.1					Cup000043g029858.1
Cup000007g007879.1	0	0	0	0	0	0	0	0				Cup000042g029492.1	Cup000015g015355.A	Cup000004g004129.A					Cup000015g015355.A
Cup000007g007884.A	0	0	0	0	0	0	0	0				Cup000049g032069.1	Cup000012g012832.1	Cup000052g032754.1					Cup000012g012832.1
Cup000007g007886.A	0	0	0	0	0	0	0	0				Cup000010g010819.1	Cup000330g044226.1	Cup000019g017837.1					Cup000330g044226.1
Cup000007g007888.1	0	0	0	0	0	0	0	0				Cup000016g015954.A	Cup000044g030230.1	Cup000004g003748.1					Cup000044g030230.1
Cup000007g007899.1	0	0	0	0	0	0	0	0				Cup000087g038091.A	Cup000064g035141.1	Cup000058g034121.1					Cup000064g035141.1
Cup000007g007901.1	0	0	0	0	0	0	0	0				Cup000032g025177.1	Cup000028g022972.1	Cup000008g008610.1					Cup000028g022972.1
Cup000007g007923.1	0	0	0	0	0	0	0	0				Cup000029g023533.1	Cup000023g020367.1	Cup000010g010485.1					Cup000023g020367.1
Cup000007g007929.1	0	0	0	0	0	0	0	0				Cup000027g022513.1	Cup000010g010323.A	Cup000027g022708.1					Cup000010g010323.A
Cup000007g007931.1	0	0	0	0	0	0	0	0				Cup000022g020026.1	Cup000048g031839.1	Cup000015g015263.1					Cup000048g031839.1
Cup000007g007933.A	0	0	0	0	0	0	0	0				Cup000011g011374.1	Cup000020g018760.1	Cup000104g039717.1					Cup000020g018760.1
Cup000007g007946.A	0	0	0	0	0	0	0	0				Cup000007g007828.1	Cup000087g038098.A	Cup000050g032288.A					Cup000087g038098.A
Cup000007g007954.A	0	0	0	0	0	0	0	0				Cup000207g043397.1	Cup000133g041198.1	Cup000034g026425.1					Cup000133g041198.1
Cup000007g007967.A	0	0	0	0	0	0	0	0				Cup000003g002810.1	Cup000172g042718.A	Cup000001g000955.A					Cup000172g042718.A
Cup000007g007971.1	0	0	0	0	0	0	0	0				Cup000038g027656.1	Cup000024g021133.1	Cup000030g024042.1					Cup000024g021133.1
Cup000007g007972.A	0	0	0	0	0	0	0	0				Cup000007g007826.1	Cup000101g039408.1	Cup000024g021236.A					Cup000101g039408.1
Cup000007g007973.A	0	0	0	0	0	0	0	0				Cup000064g035270.1	Cup000103g039629.1	Cup000024g021003.A					Cup000103g039629.1
Cup000007g007974.1	0	0	0	0	0	0	0	0				Cup000066g035638.1	Cup000062g034981.1	Cup000025g021411.1					Cup000062g034981.1
Cup000007g007979.1	0	0	0	0	0	0	0	0				Cup000008g008558.1	Cup000044g030255.1	Cup000154g042129.1					Cup000044g030255.1
Cup000007g007994.1	0	0	0	0	0	0	0	0				Cup000029g023458.1	Cup000042g029745.1	Cup000007g007615.1					Cup000042g029745.1
Cup000007g008002.1	0	0	0	0	0	0	0	0				Cup000010g010440.1	Cup000044g030393.1	Cup000066g035565.1					Cup000044g030393.1
Cup000007g008006.A	0	0	0	0	0	0	0	0				Cup000038g028048.A	Cup000054g033377.1	Cup000027g022630.1					Cup000054g033377.1
Cup000007g008009.A	0	0	0	0	0	0	0	0				Cup000026g021934.1	Cup000053g033131.1	Cup000014g014618.1					Cup000053g033131.1
Cup000007g008012.A	0	0	0	0	0	0	0	0				Cup000013g013767.1	Cup000009g009879.1	Cup000012g012830.1					Cup000009g009879.1
Cup000007g008013.1	0	0	0	0	0	0	0	0				Cup000002g001656.A	Cup000013g013680.1	Cup000028g023216.1					Cup000013g013680.1
Cup000007g008018.A	0	0	0	0	0	0	0	0				Cup000003g002882.1	Cup000003g003100.1	Cup000033g025941.1					Cup000003g003100.1
Cup000007g008023.1	0	0	0	0	0	0	0	0				Cup000057g034046.1	Cup000036g027128.1	Cup000052g032747.1					Cup000036g027128.1
Cup000007g008033.A	0	0	0	0	0	0	0	0				Cup000014g014701.1	Cup000021g019117.1	Cup000093g038716.1					Cup000021g019117.1
Cup000008g008079.A	0	0	0	0	0	0	0	0				Cup000020g018800.A	Cup000004g004602.1	Cup000037g027264.1					Cup000004g004602.1
Cup000008g008087.A	0	0	0	0	0	0	0	0				Cup000014g014543.1	Cup000011g011890.1	Cup000007g007338.1					Cup000011g011890.1
Cup000008g008122.A	0	0	0	0	0	0	0	0				Cup000005g005506.1	Cup000033g025685.1	Cup000008g008354.1					Cup000033g025685.1
Cup000008g008128.1	0	0	0	0	0	0	0	0				Cup000421g044508.1	Cup000005g004962.1	Cup000025g021685.1					Cup000005g004962.1
Cup000008g008213.A	0	0	0	0	0	0	0	0				Cup000011g011434.1	Cup000007g007201.1	Cup000008g008058.A					Cup000007g007201.1
Cup000008g008236.A	0	0	0	0	0	0	0	0				Cup000020g018598.1	Cup000002g002291.1	Cup000069g036172.A					Cup000002g002291.1
Cup000008g008250.A	0	0	0	0	0	0	0	0				Cup000017g016791.1	Cup000037g027563.A	Cup000016g016174.1					Cup000037g027563.A
Cup000008g008261.A	0	0	0	0	0	0	0	0				Cup000081g037333.1	Cup000011g011379.A	Cup000020g018572.1					Cup000011g011379.A
Cup000008g008294.A	0	0	0	0	0	0	0	0				Cup000105g039874.A	Cup000011g011804.1	Cup000066g035690.A					Cup000011g011804.1
Cup000008g008303.A	0	0	0	0	0	0	0	0				Cup000016g016064.A	Cup000056g033777.A	Cup000027g022756.1					Cup000056g033777.A
Cup000008g008318.1	0	0	0	0	0	0	0	0				Cup000097g039156.1	Cup000032g025411.1	Cup000013g013695.1					Cup000032g025411.1
Cup000008g008321.A	0	0	0	0	0	0	0	0				Cup000026g022228.1	Cup002038g046059.A	Cup000092g038505.A					Cup002038g046059.A
Cup000008g008330.A	0	0	0	0	0	0	0	0				Cup000044g030209.1	Cup000038g027887.1	Cup000030g024123.1					Cup000038g027887.1
Cup000008g008339.1	0	0	0	0	0	0	0	0				Cup000031g024667.1	Cup000002g001502.1	Cup000022g019692.1					Cup000002g001502.1
Cup000008g008361.A	0	0	0	0	0	0	0	0				Cup000006g006506.A	Cup000038g027776.1	Cup000006g006080.1					Cup000038g027776.1
Cup000008g008367.A	0	0	0	0	0	0	0	0				Cup000007g007097.1	Cup000022g019832.A	Cup000006g006536.1					Cup000022g019832.A
Cup000008g008379.1	0	0	0	0	0	0	0	0				Cup000192g043164.1	Cup000064g035238.1	Cup000037g027536.1					Cup000064g035238.1
Cup000008g008381.A	0	0	0	0	0	0	0	0				Cup000013g013609.1	Cup000057g034083.A	Cup000144g041756.A					Cup000057g034083.A
Cup000008g008384.1	0	0	0	0	0	0	0	0				Cup000008g008656.1	Cup000015g015184.1	Cup000004g004836.A					Cup000015g015184.1
Cup000008g008390.A	0	0	0	0	0	0	0	0				Cup000011g011887.1	Cup000006g006206.1	Cup000086g037986.A					Cup000006g006206.1
Cup000008g008393.1	0	0	0	0	0	0	0	0				Cup000030g023965.1	Cup000033g025680.1	Cup000008g008606.1					Cup000033g025680.1
Cup000008g008406.A	0	0	0	0	0	0	0	0				Cup000009g009349.1	Cup000019g018251.1	Cup000049g032128.1					Cup000019g018251.1
Cup000008g008414.1	0	0	0	0	0	0	0	0				Cup000064g035227.1	Cup000048g031677.1	Cup000019g017787.1					Cup000048g031677.1
Cup000008g008427.A	0	0	0	0	0	0	0	0				Cup000022g019948.1	Cup000070g036207.1	Cup000038g027710.1					Cup000070g036207.1
Cup000008g008429.A	0	0	0	0	0	0	0	0				Cup000007g007813.1	Cup000030g024326.1	Cup000032g025345.1					Cup000030g024326.1
Cup000008g008435.A	0	0	0	0	0	0	0	0				Cup000051g032623.1	Cup000068g036009.A	Cup000020g018984.A					Cup000068g036009.A
Cup000008g008437.A	0	0	0	0	0	0	0	0				Cup000649g045008.1	Cup000045g030786.1	Cup000017g016736.1					Cup000045g030786.1
Cup000008g008440.1	0	0	0	0	0	0	0	0				Cup000004g004603.1	Cup000154g042132.1	Cup000028g022961.1					Cup000154g042132.1
Cup000008g008444.A	0	0	0	0	0	0	0	0				Cup000025g021300.1	Cup000085g037806.A	Cup000004g003899.1					Cup000085g037806.A
Cup000008g008445.1	0	0	0	0	0	0	0	0				Cup000073g036584.1	Cup000027g022721.1	Cup000049g032014.1					Cup000027g022721.1
Cup000008g008453.A	0	0	0	0	0	0	0	0				Cup000013g013670.1	Cup000030g024350.1	Cup000038g028063.1					Cup000030g024350.1
Cup000008g008454.A	0	0	0	0	0	0	0	0				Cup000032g025145.1	Cup000001g001121.1	Cup000054g033416.1					Cup000001g001121.1
Cup000008g008455.A	0	0	0	0	0	0	0	0				Cup000016g015426.1	Cup000007g007693.1	Cup000029g023494.1					Cup000007g007693.1
Cup000008g008462.A	0	0	0	0	0	0	0	0				Cup000150g041943.1	Cup000020g018942.1	Cup000055g033565.1					Cup000020g018942.1
Cup000008g008470.A	0	0	0	0	0	0	0	0				Cup000023g020549.1	Cup000023g020447.1	Cup000098g039250.1					Cup000023g020447.1
Cup000008g008471.A	0	0	0	0	0	0	0	0				Cup000025g021385.1	Cup000005g005570.A	Cup000054g033366.1					Cup000005g005570.A
Cup000008g008478.1	0	0	0	0	0	0	0	0				Cup000013g013851.1	Cup000005g005615.1	Cup000005g005202.1					Cup000005g005615.1
Cup000008g008480.1	0	0	0	0	0	0	0	0				Cup000028g022870.1	Cup000033g025992.1	Cup000001g000407.1					Cup000033g025992.1
Cup000008g008483.1	0	0	0	0	0	0	0	0				Cup000134g041298.1	Cup000004g004559.A	Cup001051g045491.1					Cup000004g004559.A
Cup000008g008489.A	0	0	0	0	0	0	0	0				Cup000086g038047.1	Cup000003g003264.A	Cup000450g044601.1					Cup000003g003264.A
Cup000008g008491.A	0	0	0	0	0	0	0	0				Cup007198g046910.A	Cup000008g008731.1	Cup000065g035466.1					Cup000008g008731.1
Cup000008g008492.A	0	0	0	0	0	0	0	0				Cup000091g038444.1	Cup000006g006251.1	Cup000016g015921.1					Cup000006g006251.1
Cup000008g008494.1	0	0	0	0	0	0	0	0				Cup000374g044370.1	Cup000016g015512.1	Cup000012g012421.1					Cup000016g015512.1
Cup000008g008495.A	0	0	0	0	0	0	0	0				Cup000011g011797.1	Cup000004g003690.1	Cup000011g011682.A					Cup000004g003690.1
Cup000008g008497.1	0	0	0	0	0	0	0	0				Cup000001g000392.1	Cup000052g032942.1	Cup000017g016301.1					Cup000052g032942.1
Cup000008g008498.A	0	0	0	0	0	0	0	0				Cup000060g034324.1	Cup000003g002628.1	Cup000018g017108.1					Cup000003g002628.1
Cup000008g008502.1	0	0	0	0	0	0	0	0				Cup000028g023229.A	Cup000195g043251.1	Cup000003g002757.1					Cup000195g043251.1
Cup000008g008503.A	0	0	0	0	0	0	0	0				Cup000031g024583.1	Cup000025g021637.1	Cup000267g043915.1					Cup000025g021637.1
Cup000008g008505.A	0	0	0	0	0	0	0	0				Cup000019g017854.1	Cup000006g006718.1	Cup000023g020297.1					Cup000006g006718.1
Cup000008g008508.A	0	0	0	0	0	0	0	0				Cup000038g027657.1	Cup000134g041308.1	Cup000169g042622.1					Cup000134g041308.1
Cup000008g008516.A	0	0	0	0	0	0	0	0				Cup000093g038804.1	Cup000006g006595.1	Cup000030g024440.1					Cup000006g006595.1
Cup000008g008517.A	0	0	0	0	0	0	0	0				Cup000061g034628.1	Cup000022g020224.A	Cup000035g026857.1					Cup000022g020224.A
Cup000008g008519.1	0	0	0	0	0	0	0	0				Cup000450g044604.1	Cup000001g000896.1	Cup000050g032304.A					Cup000001g000896.1
Cup000008g008520.A	0	0	0	0	0	0	0	0				Cup000015g015020.1	Cup000071g036315.1	Cup000016g015748.1					Cup000071g036315.1
Cup000008g008524.A	0	0	0	0	0	0	0	0				Cup000009g009873.1	Cup000006g006729.1	Cup000011g012008.1					Cup000006g006729.1
Cup000008g008531.A	0	0	0	0	0	0	0	0				Cup000041g029014.1	Cup000028g022871.A	Cup000094g038819.1					Cup000028g022871.A
Cup000008g008542.A	0	0	0	0	0	0	0	0				Cup000043g029914.1	Cup000027g022566.1	Cup000023g020547.1					Cup000027g022566.1
Cup000008g008551.1	0	0	0	0	0	0	0	0				Cup000146g041837.A	Cup000013g013080.1	Cup000117g040523.A					Cup000013g013080.1
Cup000008g008578.1	0	0	0	0	0	0	0	0				Cup000017g016401.1	Cup000003g003452.1	Cup000197g043287.1					Cup000003g003452.1
Cup000008g008657.1	0	0	0	0	0	0	0	0				Cup000289g044041.1	Cup000040g028802.1	Cup000052g032852.A					Cup000040g028802.1
Cup000008g008692.1	0	0	0	0	0	0	0	0				Cup000007g007131.1	Cup000029g023531.1	Cup000010g010860.1					Cup000029g023531.1
Cup000008g008723.1	0	0	0	0	0	0	0	0				Cup000022g020063.1	Cup000060g034374.1	Cup000013g013652.1					Cup000060g034374.1
Cup000008g008735.A	0	0	0	0	0	0	0	0				Cup000033g025632.1	Cup000003g002898.1	Cup000032g025364.1					Cup000003g002898.1
Cup000008g008757.A	0	0	0	0	0	0	0	0				Cup000002g001517.1	Cup000041g028977.1	Cup000008g008064.1					Cup000041g028977.1
Cup000008g008763.A	0	0	0	0	0	0	0	0				Cup000081g037339.1	Cup000020g018813.1	Cup000005g005096.1					Cup000020g018813.1
Cup000008g008785.1	0	0	0	0	0	0	0	0				Cup000018g017262.1	Cup000035g026512.1	Cup000015g014940.1					Cup000035g026512.1
Cup000008g008825.1	0	0	0	0	0	0	0	0				Cup000094g038821.1	Cup000052g032810.1	Cup000002g002145.1					Cup000052g032810.1
Cup000008g008826.A	0	0	0	0	0	0	0	0				Cup000050g032258.1	Cup000002g001925.A	Cup000053g033192.1					Cup000002g001925.A
Cup000008g008833.1	0	0	0	0	0	0	0	0				Cup000005g005128.1	Cup000045g030673.1	Cup000009g009536.A					Cup000045g030673.1
Cup000008g008846.A	0	0	0	0	0	0	0	0				Cup000012g012698.1	Cup000010g011000.1	Cup000005g005572.A					Cup000010g011000.1
Cup000008g008849.A	0	0	0	0	0	0	0	0				Cup000035g026887.1	Cup000006g006320.A	Cup000551g044850.1					Cup000006g006320.A
Cup000008g008855.1	0	0	0	0	0	0	0	0				Cup000005g005743.1	Cup000009g009457.1	Cup000013g013293.1					Cup000009g009457.1
Cup000008g008859.A	0	0	0	0	0	0	0	0				Cup000054g033374.1	Cup000373g044363.1	Cup000042g029538.1					Cup000373g044363.1
Cup000008g008879.1	0	0	0	0	0	0	0	0				Cup000003g002820.1	Cup000142g041578.A	Cup000038g027650.1					Cup000142g041578.A
Cup000008g008885.1	0	0	0	0	0	0	0	0				Cup000052g032851.A	Cup000093g038782.1	Cup000005g005538.1					Cup000093g038782.1
Cup000008g008887.1	0	0	0	0	0	0	0	0				Cup000045g030599.1	Cup000037g027347.1	Cup000001g000148.1					Cup000037g027347.1
Cup000008g008888.A	0	0	0	0	0	0	0	0				Cup000001g001260.1	Cup000026g022389.1	Cup000019g017935.1					Cup000026g022389.1
Cup000008g008889.A	0	0	0	0	0	0	0	0				Cup000012g012442.1	Cup000007g007192.1	Cup000016g015674.1					Cup000007g007192.1
Cup000008g008894.1	0	0	0	0	0	0	0	0				Cup000017g016230.1	Cup000008g008071.1	Cup000071g036306.A					Cup000008g008071.1
Cup000008g008895.A	0	0	0	0	0	0	0	0				Cup000003g003266.1	Cup000134g041285.A	Cup000006g006655.1					Cup000134g041285.A
Cup000008g008903.A	0	0	0	0	0	0	0	0				Cup000032g025242.A	Cup000013g013127.1	Cup000031g024704.1					Cup000013g013127.1
Cup000008g008906.1	0	0	0	0	0	0	0	0				Cup000042g029718.1	Cup000396g044460.1	Cup000015g015177.1					Cup000396g044460.1
Cup000008g008908.A	0	0	0	0	0	0	0	0				Cup000030g023953.A	Cup000045g030902.1	Cup000013g013882.1					Cup000045g030902.1
Cup000008g008911.A	0	0	0	0	0	0	0	0				Cup000003g002853.1	Cup000020g018932.1	Cup000017g016313.1					Cup000020g018932.1
Cup000008g008917.A	0	0	0	0	0	0	0	0				Cup000006g006315.1	Cup000042g029702.1	Cup000010g011141.1					Cup000042g029702.1
Cup000008g008921.A	0	0	0	0	0	0	0	0				Cup000124g040849.1	Cup000012g012436.1	Cup000004g004632.1					Cup000012g012436.1
Cup000008g008923.A	0	0	0	0	0	0	0	0				Cup000008g008114.1	Cup000006g006205.A	Cup000050g032233.A					Cup000006g006205.A
Cup000008g008924.A	0	0	0	0	0	0	0	0				Cup000010g010915.1	Cup000006g006032.1	Cup000058g034162.1					Cup000006g006032.1
Cup000008g008936.1	0	0	0	0	0	0	0	0				Cup000018g017116.1	Cup000011g011263.1	Cup000046g031013.1					Cup000011g011263.1
Cup000008g008940.1	0	0	0	0	0	0	0	0				Cup000008g008696.1	Cup000010g010975.1	Cup000074g036736.1					Cup000010g010975.1
Cup000008g008944.1	0	0	0	0	0	0	0	0				Cup000003g003293.1	Cup000033g025611.A	Cup000017g016219.A					Cup000033g025611.A
Cup000008g008948.1	0	0	0	0	0	0	0	0				Cup000026g022023.1	Cup000048g031632.1	Cup000001g001285.1					Cup000048g031632.1
Cup000008g008950.A	0	0	0	0	0	0	0	0				Cup000008g008694.1	Cup000025g021431.A	Cup000014g014274.1					Cup000025g021431.A
Cup000008g008955.A	0	0	0	0	0	0	0	0				Cup000003g003330.1	Cup000064g035137.1	Cup000020g018462.1					Cup000064g035137.1
Cup000008g008956.A	0	0	0	0	0	0	0	0				Cup000013g013591.1	Cup000039g028252.1	Cup000015g015022.1					Cup000039g028252.1
Cup000008g008957.A	0	0	0	0	0	0	0	0				Cup000002g001683.1	Cup000031g024709.1	Cup000002g002266.1					Cup000031g024709.1
Cup000008g008959.A	0	0	0	0	0	0	0	0				Cup000001g000445.1	Cup000130g041051.1	Cup000003g002893.1					Cup000130g041051.1
Cup000008g008961.A	0	0	0	0	0	0	0	0				Cup000038g027669.1	Cup000014g014183.1	Cup000150g041940.1					Cup000014g014183.1
Cup000008g008966.A	0	0	0	0	0	0	0	0				Cup000026g022301.1	Cup000062g034846.1	Cup000003g003300.1					Cup000062g034846.1
Cup000008g008967.1	0	0	0	0	0	0	0	0				Cup000004g003756.1	Cup000017g017023.1	Cup000023g020239.1					Cup000017g017023.1
Cup000008g008968.A	0	0	0	0	0	0	0	0				Cup000056g033745.1	Cup000030g024222.1	Cup000043g030029.1					Cup000030g024222.1
Cup000009g008977.1	0	0	0	0	0	0	0	0				Cup000004g004412.1	Cup000011g011408.1	Cup000004g003782.1					Cup000011g011408.1
Cup000009g008990.A	0	0	0	0	0	0	0	0				Cup000004g004398.1	Cup000001g000108.1	Cup000023g020407.A					Cup000001g000108.1
Cup000009g009005.1	0	0	0	0	0	0	0	0				Cup000160g042303.1	Cup000046g031096.1	Cup000020g018420.1					Cup000046g031096.1
Cup000009g009023.1	0	0	0	0	0	0	0	0				Cup000942g045394.1	Cup000043g030067.1	Cup000033g025760.A					Cup000043g030067.1
Cup000009g009070.A	0	0	0	0	0	0	0	0				Cup000038g027802.A	Cup000030g023945.1	Cup000006g006638.1					Cup000030g023945.1
Cup000009g009072.1	0	0	0	0	0	0	0	0				Cup000040g028708.1	Cup000062g034831.1	Cup000018g017277.1					Cup000062g034831.1
Cup000009g009094.A	0	0	0	0	0	0	0	0				Cup000057g034018.1	Cup000172g042728.1	Cup000004g003642.1					Cup000172g042728.1
Cup000009g009098.A	0	0	0	0	0	0	0	0				Cup000055g033575.1	Cup000014g014687.A	Cup000002g002160.1					Cup000014g014687.A
Cup000009g009109.1	0	0	0	0	0	0	0	0				Cup000042g029619.A	Cup000041g028978.1	Cup000019g017794.1					Cup000041g028978.1
Cup000009g009146.1	0	0	0	0	0	0	0	0				Cup000053g033015.1	Cup000086g037976.1	Cup000017g016490.1					Cup000086g037976.1
Cup000009g009159.1	0	0	0	0	0	0	0	0				Cup000008g008203.1	Cup000040g028845.1	Cup000004g004599.1					Cup000040g028845.1
Cup000009g009163.1	0	0	0	0	0	0	0	0				Cup000047g031409.1	Cup000010g010760.1	Cup000005g005979.A					Cup000010g010760.1
Cup000009g009177.A	0	0	0	0	0	0	0	0				Cup000001g001213.1	Cup000004g004471.1	Cup000020g018480.1					Cup000004g004471.1
Cup000009g009180.A	0	0	0	0	0	0	0	0				Cup000004g004446.1	Cup000032g025172.1	Cup000267g043921.A					Cup000032g025172.1
Cup000009g009184.A	0	0	0	0	0	0	0	0				Cup000026g022261.1	Cup000008g008820.1	Cup000014g014779.1					Cup000008g008820.1
Cup000009g009205.1	0	0	0	0	0	0	0	0				Cup000007g007522.A	Cup000010g010953.1	Cup000020g018616.1					Cup000010g010953.1
Cup000009g009212.1	0	0	0	0	0	0	0	0				Cup000037g027327.1	Cup000074g036655.1	Cup000010g010403.1					Cup000074g036655.1
Cup000009g009213.1	0	0	0	0	0	0	0	0				Cup000017g016345.1	Cup000024g020720.1	Cup000037g027510.1					Cup000024g020720.1
Cup000009g009220.1	0	0	0	0	0	0	0	0				Cup000003g003173.1	Cup000180g042907.1	Cup000004g004460.1					Cup000180g042907.1
Cup000009g009242.A	0	0	0	0	0	0	0	0				Cup000085g037859.1	Cup000012g012619.1	Cup000012g012834.1					Cup000012g012619.1
Cup000009g009243.1	0	0	0	0	0	0	0	0				Cup000020g018606.1	Cup000053g033052.1	Cup000014g014234.1					Cup000053g033052.1
Cup000009g009251.1	0	0	0	0	0	0	0	0				Cup000025g021293.1	Cup000047g031452.1	Cup000055g033474.1					Cup000047g031452.1
Cup000009g009254.1	0	0	0	0	0	0	0	0				Cup000038g027764.1	Cup000008g008232.1	Cup000103g039684.1					Cup000008g008232.1
Cup000009g009299.1	0	0	0	0	0	0	0	0				Cup000032g025314.1	Cup000034g026208.1	Cup000021g019373.1					Cup000034g026208.1
Cup000009g009301.A	0	0	0	0	0	0	0	0				Cup000004g004210.A	Cup000017g016815.1	Cup000030g024219.A					Cup000017g016815.1
Cup000009g009310.1	0	0	0	0	0	0	0	0				Cup000468g044657.1	Cup000061g034736.A	Cup000017g016432.1					Cup000061g034736.A
Cup000009g009335.1	0	0	0	0	0	0	0	0				Cup000025g021836.1	Cup000001g001111.1	Cup000019g018226.1					Cup000001g001111.1
Cup000009g009342.1	0	0	0	0	0	0	0	0				Cup000007g007181.A	Cup000070g036211.1	Cup000034g026182.1					Cup000070g036211.1
Cup000009g009357.A	0	0	0	0	0	0	0	0				Cup000042g029659.1	Cup000023g020559.1	Cup000030g024255.1					Cup000023g020559.1
Cup000009g009359.1	0	0	0	0	0	0	0	0				Cup000001g000222.1	Cup000003g002985.1	Cup000013g013765.1					Cup000003g002985.1
Cup000009g009365.A	0	0	0	0	0	0	0	0				Cup000042g029471.1	Cup000051g032607.1	Cup000029g023478.1					Cup000051g032607.1
Cup000009g009376.1	0	0	0	0	0	0	0	0				Cup000031g024839.1	Cup000077g036973.1	Cup000038g027700.1					Cup000077g036973.1
Cup000009g009379.A	0	0	0	0	0	0	0	0				Cup000010g010136.1	Cup000025g021373.1	Cup000143g041673.1					Cup000025g021373.1
Cup000009g009383.1	0	0	0	0	0	0	0	0				Cup000180g042926.1	Cup000009g009638.1	Cup000004g004326.A					Cup000009g009638.1
Cup000009g009391.A	0	0	0	0	0	0	0	0				Cup000008g008775.1	Cup000006g006482.1	Cup000028g022945.1					Cup000006g006482.1
Cup000009g009392.1	0	0	0	0	0	0	0	0				Cup000834g045274.1	Cup000025g021565.A	Cup000047g031419.1					Cup000025g021565.A
Cup000009g009393.A	0	0	0	0	0	0	0	0				Cup000072g036514.A	Cup000005g005549.1	Cup000053g033019.1					Cup000005g005549.1
Cup000009g009402.1	0	0	0	0	0	0	0	0				Cup000035g026668.1	Cup000017g016398.A	Cup000041g029128.A					Cup000017g016398.A
Cup000009g009406.A	0	0	0	0	0	0	0	0				Cup000001g000255.A	Cup000091g038365.1	Cup000056g033720.1					Cup000091g038365.1
Cup000009g009407.1	0	0	0	0	0	0	0	0				Cup000030g024418.A	Cup000006g006338.1	Cup000029g023782.1					Cup000006g006338.1
Cup000009g009408.A	0	0	0	0	0	0	0	0				Cup000047g031445.1	Cup000011g011935.1	Cup000097g039125.1					Cup000011g011935.1
Cup000009g009409.A	0	0	0	0	0	0	0	0				Cup000038g027678.1	Cup000020g018759.1	Cup000018g017147.1					Cup000020g018759.1
Cup000009g009417.A	0	0	0	0	0	0	0	0				Cup000011g011564.A	Cup000002g002071.1	Cup000536g044819.1					Cup000002g002071.1
Cup000009g009418.1	0	0	0	0	0	0	0	0				Cup000012g012346.1	Cup000006g006187.1	Cup000055g033604.1					Cup000006g006187.1
Cup000009g009424.A	0	0	0	0	0	0	0	0				Cup000042g029716.1	Cup000004g004173.A	Cup000270g043944.1					Cup000004g004173.A
Cup000009g009438.A	0	0	0	0	0	0	0	0				Cup000030g024466.A	Cup000014g014539.1	Cup000008g008253.1					Cup000014g014539.1
Cup000009g009448.A	0	0	0	0	0	0	0	0				Cup000020g018871.1	Cup000070g036259.1	Cup000046g031238.1					Cup000070g036259.1
Cup000009g009449.A	0	0	0	0	0	0	0	0				Cup000016g015916.1	Cup000039g028400.1	Cup000009g009592.1					Cup000039g028400.1
Cup000009g009454.1	0	0	0	0	0	0	0	0				Cup000010g010279.1	Cup000072g036425.1	Cup000080g037242.1					Cup000072g036425.1
Cup000009g009466.1	0	0	0	0	0	0	0	0				Cup000018g017134.1	Cup000004g003981.1	Cup000025g021274.1					Cup000004g003981.1
Cup000009g009469.A	0	0	0	0	0	0	0	0				Cup000140g041503.1	Cup000046g031072.A	Cup000038g027973.1					Cup000046g031072.A
Cup000009g009472.A	0	0	0	0	0	0	0	0				Cup000005g005677.A	Cup000127g040947.1	Cup000018g017716.1					Cup000127g040947.1
Cup000009g009474.1	0	0	0	0	0	0	0	0				Cup000004g003845.1	Cup000013g013852.1	Cup000032g025131.1					Cup000013g013852.1
Cup000009g009476.A	0	0	0	0	0	0	0	0				Cup000107g040003.1	Cup000011g011883.A	Cup000036g027133.1					Cup000011g011883.A
Cup000009g009483.A	0	0	0	0	0	0	0	0				Cup000003g003168.1	Cup000026g022126.1	Cup000063g035097.A					Cup000026g022126.1
Cup000009g009486.A	0	0	0	0	0	0	0	0				Cup000057g034072.1	Cup000151g042002.1	Cup000161g042341.1					Cup000151g042002.1
Cup000009g009488.A	0	0	0	0	0	0	0	0				Cup000158g042219.A	Cup000021g019471.1	Cup000001g000520.A					Cup000021g019471.1
Cup000009g009490.1	0	0	0	0	0	0	0	0				Cup000052g032920.1	Cup000007g007829.1	Cup000002g001496.1					Cup000007g007829.1
Cup000009g009497.1	0	0	0	0	0	0	0	0				Cup000028g022997.1	Cup000039g028338.1	Cup000056g033737.1					Cup000039g028338.1
Cup000009g009500.A	0	0	0	0	0	0	0	0				Cup000175g042802.1	Cup000007g007738.1	Cup000043g030009.1					Cup000007g007738.1
Cup000009g009501.A	0	0	0	0	0	0	0	0				Cup000009g009708.1	Cup000094g038851.A	Cup000001g000802.1					Cup000094g038851.A
Cup000009g009502.1	0	0	0	0	0	0	0	0				Cup000022g019773.1	Cup000008g008691.1	Cup000019g018239.1					Cup000008g008691.1
Cup000009g009503.A	0	0	0	0	0	0	0	0				Cup000006g006076.1	Cup000033g026054.1	Cup000011g011473.1					Cup000033g026054.1
Cup000009g009515.1	0	0	0	0	0	0	0	0				Cup000004g003837.1	Cup000012g012614.1	Cup000032g025438.1					Cup000012g012614.1
Cup000009g009518.A	0	0	0	0	0	0	0	0				Cup000084g037634.1	Cup000029g023816.1	Cup000064g035242.1					Cup000029g023816.1
Cup000009g009526.1	0	0	0	0	0	0	0	0				Cup000004g004230.A	Cup000002g002555.A	Cup000009g009852.1					Cup000002g002555.A
Cup000009g009529.A	0	0	0	0	0	0	0	0				Cup000048g031796.1	Cup000012g012825.1	Cup000005g005467.A					Cup000012g012825.1
Cup000009g009531.A	0	0	0	0	0	0	0	0				Cup000110g040234.1	Cup000039g028256.1	Cup000013g013859.1					Cup000039g028256.1
Cup000009g009557.1	0	0	0	0	0	0	0	0				Cup000025g021614.A	Cup000013g013647.1	Cup000004g003988.1					Cup000013g013647.1
Cup000009g009561.1	0	0	0	0	0	0	0	0				Cup000171g042697.1	Cup000001g000908.1	Cup000027g022506.A					Cup000001g000908.1
Cup000009g009569.1	0	0	0	0	0	0	0	0				Cup000063g035081.1	Cup000042g029752.1	Cup000022g019934.1					Cup000042g029752.1
Cup000009g009599.1	0	0	0	0	0	0	0	0				Cup000080g037258.1	Cup000030g024130.A	Cup000086g037965.A					Cup000030g024130.A
Cup000009g009624.A	0	0	0	0	0	0	0	0				Cup000103g039604.1	Cup000011g011823.1	Cup000003g003199.1					Cup000011g011823.1
Cup000009g009646.1	0	0	0	0	0	0	0	0				Cup000001g000259.1	Cup000091g038343.1	Cup000016g016051.1					Cup000091g038343.1
Cup000009g009666.1	0	0	0	0	0	0	0	0				Cup000031g024573.1	Cup000013g013019.1	Cup000020g018468.A					Cup000013g013019.1
Cup000009g009675.1	0	0	0	0	0	0	0	0				Cup000011g011188.A	Cup000026g022488.1	Cup000045g030672.1					Cup000026g022488.1
Cup000009g009678.1	0	0	0	0	0	0	0	0				Cup000004g004261.1	Cup000020g018518.1	Cup000051g032435.1					Cup000020g018518.1
Cup000009g009683.1	0	0	0	0	0	0	0	0				Cup000006g006185.1	Cup000004g003645.1	Cup000001g000809.1					Cup000004g003645.1
Cup000009g009689.A	0	0	0	0	0	0	0	0				Cup000056g033831.1	Cup000080g037213.1	Cup000017g016386.1					Cup000080g037213.1
Cup000009g009690.A	0	0	0	0	0	0	0	0				Cup000052g032781.1	Cup000028g023212.1	Cup000047g031556.1					Cup000028g023212.1
Cup000009g009712.A	0	0	0	0	0	0	0	0				Cup000044g030227.1	Cup000030g023984.1	Cup000027g022657.1					Cup000030g023984.1
Cup000009g009731.A	0	0	0	0	0	0	0	0				Cup000005g005649.1	Cup000045g030807.1	Cup000091g038358.1					Cup000045g030807.1
Cup000009g009741.1	0	0	0	0	0	0	0	0				Cup000011g011938.1	Cup000037g027505.1	Cup000013g013889.1					Cup000037g027505.1
Cup000009g009746.A	0	0	0	0	0	0	0	0				Cup000011g011383.1	Cup000026g022376.1	Cup000026g021910.1					Cup000026g022376.1
Cup000009g009750.1	0	0	0	0	0	0	0	0				Cup000042g029650.1	Cup000004g003826.1	Cup000074g036637.1					Cup000004g003826.1
Cup000009g009761.A	0	0	0	0	0	0	0	0				Cup000020g018740.1	Cup000124g040829.1	Cup000007g007278.1					Cup000124g040829.1
Cup000009g009762.1	0	0	0	0	0	0	0	0				Cup000041g029296.1	Cup000018g017650.1	Cup000005g005125.1					Cup000018g017650.1
Cup000009g009763.A	0	0	0	0	0	0	0	0				Cup000011g011225.1	Cup000026g022056.A	Cup000014g014698.1					Cup000026g022056.A
Cup000009g009766.A	0	0	0	0	0	0	0	0				Cup000060g034557.1	Cup000036g027189.1	Cup000042g029492.1					Cup000036g027189.1
Cup000009g009771.1	0	0	0	0	0	0	0	0				Cup000030g024437.1	Cup000138g041411.A	Cup000049g032069.1					Cup000138g041411.A
Cup000009g009777.1	0	0	0	0	0	0	0	0				Cup000053g033009.1	Cup000020g018453.A	Cup000010g010819.1					Cup000020g018453.A
Cup000009g009795.A	0	0	0	0	0	0	0	0				Cup000010g010834.1	Cup000039g028311.A	Cup000016g015954.A					Cup000039g028311.A
Cup000009g009798.A	0	0	0	0	0	0	0	0				Cup000289g044046.1	Cup000016g015490.1	Cup000087g038091.A					Cup000016g015490.1
Cup000009g009814.A	0	0	0	0	0	0	0	0				Cup000030g023970.1	Cup000102g039527.1	Cup000032g025177.1					Cup000102g039527.1
Cup000009g009818.A	0	0	0	0	0	0	0	0				Cup000025g021744.1	Cup000171g042702.1	Cup000029g023533.1					Cup000171g042702.1
Cup000009g009821.A	0	0	0	0	0	0	0	0				Cup000011g012020.1	Cup000004g004347.1	Cup000027g022513.1					Cup000004g004347.1
Cup000009g009839.1	0	0	0	0	0	0	0	0				Cup000020g018880.1	Cup000053g033058.1	Cup000022g020026.1					Cup000053g033058.1
Cup000009g009846.A	0	0	0	0	0	0	0	0				Cup000010g010460.1	Cup000025g021484.1	Cup000011g011374.1					Cup000025g021484.1
Cup000009g009849.A	0	0	0	0	0	0	0	0				Cup000006g006855.1	Cup000023g020247.1	Cup000007g007828.1					Cup000023g020247.1
Cup000009g009851.A	0	0	0	0	0	0	0	0				Cup000599g044913.1	Cup000011g011757.1	Cup000207g043397.1					Cup000011g011757.1
Cup000009g009853.1	0	0	0	0	0	0	0	0				Cup000005g005517.1	Cup000058g034108.1	Cup000003g002810.1					Cup000058g034108.1
Cup000009g009855.1	0	0	0	0	0	0	0	0				Cup000006g006267.1	Cup000197g043285.1	Cup000038g027656.1					Cup000197g043285.1
Cup000009g009859.1	0	0	0	0	0	0	0	0				Cup000038g027827.A	Cup000005g005672.1	Cup000007g007826.1					Cup000005g005672.1
Cup000009g009876.A	0	0	0	0	0	0	0	0				Cup000018g017610.1	Cup000085g037766.1	Cup000064g035270.1					Cup000085g037766.1
Cup000009g009882.1	0	0	0	0	0	0	0	0				Cup000017g016331.1	Cup000028g023198.1	Cup000066g035638.1					Cup000028g023198.1
Cup000009g009902.A	0	0	0	0	0	0	0	0				Cup000037g027539.1	Cup000004g004315.1	Cup000008g008558.1					Cup000004g004315.1
Cup000009g009915.1	0	0	0	0	0	0	0	0				Cup000008g008556.1	Cup000027g022543.A	Cup000029g023458.1					Cup000027g022543.A
Cup000009g009919.1	0	0	0	0	0	0	0	0				Cup000002g002506.1	Cup000952g045416.1	Cup000010g010440.1					Cup000952g045416.1
Cup000009g009922.1	0	0	0	0	0	0	0	0				Cup000100g039384.1	Cup000037g027396.1	Cup000038g028048.A					Cup000037g027396.1
Cup000009g009928.A	0	0	0	0	0	0	0	0				Cup000020g018626.1	Cup000040g028509.1	Cup000026g021934.1					Cup000040g028509.1
Cup000009g009929.1	0	0	0	0	0	0	0	0				Cup000017g016333.1	Cup000046g031047.1	Cup000013g013767.1					Cup000046g031047.1
Cup000009g009930.A	0	0	0	0	0	0	0	0				Cup000006g006733.1	Cup000033g025696.1	Cup000002g001656.A					Cup000033g025696.1
Cup000009g009933.1	0	0	0	0	0	0	0	0				Cup000006g006356.1	Cup000031g024959.1	Cup000008g008662.1					Cup000031g024959.1
Cup000009g009934.1	0	0	0	0	0	0	0	0				Cup000009g009317.1	Cup000006g006405.1	Cup000003g002882.1					Cup000006g006405.1
Cup000009g009937.1	0	0	0	0	0	0	0	0				Cup000043g029897.1	Cup000028g022991.1	Cup000057g034046.1					Cup000028g022991.1
Cup000009g009939.A	0	0	0	0	0	0	0	0				Cup000022g019898.A	Cup000038g027779.1	Cup000014g014701.1					Cup000038g027779.1
Cup000009g009940.1	0	0	0	0	0	0	0	0				Cup000026g021906.1	Cup000001g000013.1	Cup000020g018800.A					Cup000001g000013.1
Cup000009g009944.A	0	0	0	0	0	0	0	0				Cup000025g021312.1	Cup000005g005567.1	Cup000014g014543.1					Cup000005g005567.1
Cup000009g009948.1	0	0	0	0	0	0	0	0				Cup000081g037345.1	Cup000003g002803.1	Cup000056g033669.1					Cup000003g002803.1
Cup000009g009955.1	0	0	0	0	0	0	0	0				Cup000061g034649.1	Cup000044g030451.1	Cup000005g005506.1					Cup000044g030451.1
Cup000009g009962.A	0	0	0	0	0	0	0	0				Cup000013g013244.1	Cup000065g035496.1	Cup000421g044508.1					Cup000065g035496.1
Cup000009g009968.A	0	0	0	0	0	0	0	0				Cup000017g016394.1	Cup000079g037190.1	Cup000011g011434.1					Cup000079g037190.1
Cup000009g009976.1	0	0	0	0	0	0	0	0				Cup000007g007279.1	Cup000008g008786.1	Cup000013g013643.A					Cup000008g008786.1
Cup000009g009983.A	0	0	0	0	0	0	0	0				Cup000014g014704.1	Cup000014g014445.1	Cup000020g018598.1					Cup000014g014445.1
Cup000009g009990.A	0	0	0	0	0	0	0	0				Cup000001g001169.1	Cup000051g032470.1	Cup000017g016791.1					Cup000051g032470.1
Cup000009g009997.A	0	0	0	0	0	0	0	0				Cup000012g012828.1	Cup000045g030698.1	Cup000081g037333.1					Cup000045g030698.1
Cup000009g010006.A	0	0	0	0	0	0	0	0				Cup000006g006494.1	Cup000042g029517.1	Cup000105g039874.A					Cup000042g029517.1
Cup000009g010007.1	0	0	0	0	0	0	0	0				Cup000044g030471.1	Cup000044g030426.1	Cup000016g016064.A					Cup000044g030426.1
Cup000009g010008.1	0	0	0	0	0	0	0	0				Cup000028g022993.1	Cup000010g010377.1	Cup000097g039156.1					Cup000010g010377.1
Cup000009g010010.A	0	0	0	0	0	0	0	0				Cup000020g018531.1	Cup000051g032376.1	Cup000026g022228.1					Cup000051g032376.1
Cup000009g010011.A	0	0	0	0	0	0	0	0				Cup000001g000531.A	Cup000085g037787.1	Cup000044g030209.1					Cup000085g037787.1
Cup000009g010012.1	0	0	0	0	0	0	0	0				Cup000017g016830.1	Cup000103g039686.A	Cup000031g024667.1					Cup000103g039686.A
Cup000009g010015.1	0	0	0	0	0	0	0	0				Cup000006g006303.1	Cup000122g040734.1	Cup000006g006506.A					Cup000122g040734.1
Cup000009g010019.A	0	0	0	0	0	0	0	0				Cup000037g027271.1	Cup000009g009253.1	Cup000007g007097.1					Cup000009g009253.1
Cup000009g010021.A	0	0	0	0	0	0	0	0				Cup000001g000873.1	Cup000232g043653.1	Cup000192g043164.1					Cup000232g043653.1
Cup000009g010024.A	0	0	0	0	0	0	0	0				Cup000006g006643.A	Cup000074g036762.A	Cup000013g013609.1					Cup000074g036762.A
Cup000009g010030.A	0	0	0	0	0	0	0	0				Cup000041g029313.1	Cup000009g009082.1	Cup000008g008656.1					Cup000009g009082.1
Cup000009g010035.A	0	0	0	0	0	0	0	0				Cup000213g043498.A	Cup000048g031865.1	Cup000011g011887.1					Cup000048g031865.1
Cup000009g010041.A	0	0	0	0	0	0	0	0				Cup000038g027631.1	Cup000037g027310.1	Cup000030g023965.1					Cup000037g027310.1
Cup000009g010043.A	0	0	0	0	0	0	0	0				Cup000003g003348.A	Cup000130g041118.A	Cup000009g009349.1					Cup000130g041118.A
Cup000009g010045.A	0	0	0	0	0	0	0	0				Cup000007g007812.1	Cup000068g036029.1	Cup000064g035227.1					Cup000068g036029.1
Cup000009g010056.A	0	0	0	0	0	0	0	0				Cup002638g046296.1	Cup000013g013790.1	Cup000022g019948.1					Cup000013g013790.1
Cup000009g010058.A	0	0	0	0	0	0	0	0				Cup000020g018559.1	Cup000077g036971.1	Cup000081g037360.A					Cup000077g036971.1
Cup000009g010070.A	0	0	0	0	0	0	0	0				Cup000017g016412.1	Cup000001g000765.A	Cup000007g007813.1					Cup000001g000765.A
Cup000009g010072.A	0	0	0	0	0	0	0	0				Cup000006g006978.1	Cup000002g001523.1	Cup000051g032623.1					Cup000002g001523.1
Cup000009g010080.1	0	0	0	0	0	0	0	0				Cup000047g031438.1	Cup000013g013090.1	Cup000649g045008.1					Cup000013g013090.1
Cup000009g010083.1	0	0	0	0	0	0	0	0				Cup000040g028962.1	Cup000009g009200.1	Cup000004g004603.1					Cup000009g009200.1
Cup000009g010086.1	0	0	0	0	0	0	0	0				Cup000031g024958.1	Cup000008g008299.A	Cup000025g021300.1					Cup000008g008299.A
Cup000009g010089.A	0	0	0	0	0	0	0	0				Cup000103g039688.1	Cup000003g002748.1	Cup000073g036584.1					Cup000003g002748.1
Cup000009g010095.1	0	0	0	0	0	0	0	0				Cup000040g028757.1	Cup000001g000137.1	Cup000013g013670.1					Cup000001g000137.1
Cup000009g010098.1	0	0	0	0	0	0	0	0				Cup000180g042904.1	Cup000040g028832.1	Cup000032g025145.1					Cup000040g028832.1
Cup000009g010101.1	0	0	0	0	0	0	0	0				Cup000008g008937.A	Cup000004g004571.A	Cup000016g015426.1					Cup000004g004571.A
Cup000009g010102.1	0	0	0	0	0	0	0	0				Cup000044g030208.1	Cup000007g007507.A	Cup000009g009368.A					Cup000007g007507.A
Cup000009g010115.A	0	0	0	0	0	0	0	0				Cup000017g016874.1	Cup000098g039320.1	Cup000150g041943.1					Cup000098g039320.1
Cup000009g010118.1	0	0	0	0	0	0	0	0				Cup000140g041515.A	Cup000011g011223.1	Cup000023g020549.1					Cup000011g011223.1
Cup000009g010126.A	0	0	0	0	0	0	0	0				Cup000153g042103.1	Cup000037g027526.1	Cup000025g021385.1					Cup000037g027526.1
Cup000009g010127.1	0	0	0	0	0	0	0	0				Cup000027g022636.1	Cup000043g030000.1	Cup000013g013851.1					Cup000043g030000.1
Cup000009g010128.1	0	0	0	0	0	0	0	0				Cup000050g032311.A	Cup000001g000957.1	Cup000009g009961.1					Cup000001g000957.1
Cup000010g010139.A	0	0	0	0	0	0	0	0				Cup000012g012232.1	Cup000029g023425.A	Cup000028g022870.1					Cup000029g023425.A
Cup000010g010149.A	0	0	0	0	0	0	0	0				Cup000043g030141.A	Cup000015g015014.1	Cup000134g041298.1					Cup000015g015014.1
Cup000010g010152.1	0	0	0	0	0	0	0	0				Cup000034g026416.1	Cup000009g008981.1	Cup000086g038047.1					Cup000009g008981.1
Cup000010g010154.A	0	0	0	0	0	0	0	0				Cup000003g003211.1	Cup000017g016532.A	Cup007198g046910.A					Cup000017g016532.A
Cup000010g010161.A	0	0	0	0	0	0	0	0				Cup000024g020758.1	Cup000083g037604.A	Cup000091g038444.1					Cup000083g037604.A
Cup000010g010165.1	0	0	0	0	0	0	0	0				Cup000088g038165.1	Cup000065g035354.1	Cup000374g044370.1					Cup000065g035354.1
Cup000010g010173.A	0	0	0	0	0	0	0	0				Cup000032g025128.1	Cup000015g015055.A	Cup000011g011797.1					Cup000015g015055.A
Cup000010g010183.1	0	0	0	0	0	0	0	0				Cup000004g003772.1	Cup000008g008323.1	Cup000001g000392.1					Cup000008g008323.1
Cup000010g010199.A	0	0	0	0	0	0	0	0				Cup000039g028372.1	Cup000041g029239.1	Cup000060g034324.1					Cup000041g029239.1
Cup000010g010212.1	0	0	0	0	0	0	0	0				Cup000117g040526.1	Cup000019g018333.1	Cup000010g010555.A					Cup000019g018333.1
Cup000010g010236.A	0	0	0	0	0	0	0	0				Cup000017g016876.A	Cup000010g010400.1	Cup000028g023229.A					Cup000010g010400.1
Cup000010g010238.1	0	0	0	0	0	0	0	0				Cup000108g040158.1	Cup000085g037834.1	Cup000031g024583.1					Cup000085g037834.1
Cup000010g010254.A	0	0	0	0	0	0	0	0				Cup000014g014678.1	Cup000004g003695.1	Cup000019g017854.1					Cup000004g003695.1
Cup000010g010256.A	0	0	0	0	0	0	0	0				Cup000028g022914.1	Cup000103g039681.1	Cup000038g027657.1					Cup000103g039681.1
Cup000010g010283.A	0	0	0	0	0	0	0	0				Cup000019g017836.A	Cup000045g030894.1	Cup000093g038804.1					Cup000045g030894.1
Cup000010g010319.A	0	0	0	0	0	0	0	0				Cup000020g018608.1	Cup000006g006079.1	Cup000061g034628.1					Cup000006g006079.1
Cup000010g010347.1	0	0	0	0	0	0	0	0				Cup000072g036394.1	Cup001945g046032.1	Cup000450g044604.1
Cup000010g010352.A	0	0	0	0	0	0	0	0				Cup000006g006068.1	Cup000098g039332.A	Cup000015g015020.1
Cup000010g010356.A	0	0	0	0	0	0	0	0				Cup000030g024473.A	Cup000008g008740.A	Cup000009g009873.1
Cup000010g010374.1	0	0	0	0	0	0	0	0				Cup000006g006557.A	Cup000030g024385.1	Cup000041g029014.1
Cup000010g010385.A	0	0	0	0	0	0	0	0				Cup000039g028436.1	Cup000003g002601.1	Cup000043g029914.1
Cup000010g010411.1	0	0	0	0	0	0	0	0				Cup004037g046605.1	Cup000107g040034.1	Cup000146g041837.A
Cup000010g010418.1	0	0	0	0	0	0	0	0				Cup000041g029107.1	Cup000251g043793.1	Cup000017g016401.1
Cup000010g010454.1	0	0	0	0	0	0	0	0				Cup000028g023215.1	Cup000017g016649.1	Cup000289g044041.1
Cup000010g010488.A	0	0	0	0	0	0	0	0				Cup000086g037923.1	Cup000035g026569.A	Cup000007g007131.1
Cup000010g010490.A	0	0	0	0	0	0	0	0				Cup000017g016700.1	Cup000004g003905.1	Cup000022g020063.1
Cup000010g010501.A	0	0	0	0	0	0	0	0				Cup000001g000826.1	Cup000391g044444.1	Cup000033g025632.1
Cup000010g010502.A	0	0	0	0	0	0	0	0				Cup000457g044620.1	Cup000030g024333.1	Cup000024g021102.1
Cup000010g010506.A	0	0	0	0	0	0	0	0				Cup000011g011722.1	Cup000041g029008.1	Cup000002g001517.1
Cup000010g010511.1	0	0	0	0	0	0	0	0				Cup000008g008227.A	Cup000013g013740.1	Cup000009g009484.A
Cup000010g010514.A	0	0	0	0	0	0	0	0				Cup000001g000021.A	Cup000010g010143.1	Cup000081g037339.1
Cup000010g010518.A	0	0	0	0	0	0	0	0				Cup000039g028218.1	Cup000008g008075.1	Cup000004g004663.A
Cup000010g010529.1	0	0	0	0	0	0	0	0				Cup000015g015278.1	Cup000013g013635.1	Cup000023g020326.1
Cup000010g010548.A	0	0	0	0	0	0	0	0				Cup000001g000958.1	Cup000062g034815.1	Cup000018g017262.1
Cup000010g010549.A	0	0	0	0	0	0	0	0				Cup000052g032751.1	Cup000117g040543.1	Cup000094g038821.1
Cup000010g010551.1	0	0	0	0	0	0	0	0				Cup000013g013061.1	Cup000003g003349.1	Cup000050g032258.1
Cup000010g010554.A	0	0	0	0	0	0	0	0				Cup000135g041317.1	Cup000006g006611.1	Cup000005g005128.1
Cup000010g010556.A	0	0	0	0	0	0	0	0				Cup000069g036145.1	Cup000031g024574.1	Cup000012g012698.1
Cup000010g010557.1	0	0	0	0	0	0	0	0				Cup000092g038507.1	Cup000062g034830.1	Cup000035g026887.1
Cup000010g010559.A	0	0	0	0	0	0	0	0				Cup000092g038664.A	Cup000032g025427.1	Cup000005g005743.1
Cup000010g010562.A	0	0	0	0	0	0	0	0				Cup000013g013835.A	Cup000060g034388.1	Cup000054g033374.1
Cup000010g010568.A	0	0	0	0	0	0	0	0				Cup000049g032121.1	Cup000026g022465.1	Cup000003g002820.1
Cup000010g010574.A	0	0	0	0	0	0	0	0				Cup000007g007257.1	Cup000032g025392.1	Cup000052g032851.A
Cup000010g010583.A	0	0	0	0	0	0	0	0				Cup000019g017804.1	Cup000007g007676.1	Cup000013g013039.1
Cup000010g010589.A	0	0	0	0	0	0	0	0				Cup000031g024834.1	Cup000098g039265.1	Cup000045g030599.1
Cup000010g010595.A	0	0	0	0	0	0	0	0				Cup005156g046744.1	Cup000039g028274.1	Cup000001g001260.1
Cup000010g010597.A	0	0	0	0	0	0	0	0				Cup000002g002086.1	Cup000169g042653.1	Cup000012g012442.1
Cup000010g010604.A	0	0	0	0	0	0	0	0				Cup000027g022606.1	Cup000003g002600.1	Cup000017g016230.1
Cup000010g010605.A	0	0	0	0	0	0	0	0				Cup000013g013775.1	Cup000195g043242.1	Cup000003g003266.1
Cup000010g010606.A	0	0	0	0	0	0	0	0				Cup000021g019237.1	Cup000150g041945.A	Cup000032g025242.A
Cup000010g010615.A	0	0	0	0	0	0	0	0				Cup000010g010213.1	Cup000146g041798.1	Cup000042g029718.1
Cup000010g010618.A	0	0	0	0	0	0	0	0				Cup000028g023218.1	Cup000009g009694.1	Cup000030g023953.A
Cup000010g010621.A	0	0	0	0	0	0	0	0				Cup000001g000121.1	Cup000004g003882.1	Cup000003g002853.1
Cup000010g010622.1	0	0	0	0	0	0	0	0				Cup000030g024078.1	Cup000014g014300.1	Cup000006g006315.1
Cup000010g010623.A	0	0	0	0	0	0	0	0				Cup000011g011208.1	Cup000004g003910.1	Cup000004g003774.1
Cup000010g010628.A	0	0	0	0	0	0	0	0				Cup000010g010265.1	Cup000002g002164.1	Cup000124g040849.1
Cup000010g010631.A	0	0	0	0	0	0	0	0				Cup000044g030427.1	Cup000039g028225.1	Cup000008g008114.1
Cup000010g010632.A	0	0	0	0	0	0	0	0				Cup000012g012734.1	Cup000007g007275.1	Cup000010g010915.1
Cup000010g010634.A	0	0	0	0	0	0	0	0				Cup000088g038171.1	Cup000170g042683.1	Cup000142g041582.1
Cup000010g010653.A	0	0	0	0	0	0	0	0				Cup000061g034661.1	Cup000030g024022.1	Cup000020g018459.1
Cup000010g010655.A	0	0	0	0	0	0	0	0				Cup000003g003318.1	Cup000082g037388.1	Cup000018g017116.1
Cup000010g010657.A	0	0	0	0	0	0	0	0				Cup000061g034761.1	Cup000057g034074.1	Cup000008g008696.1
Cup000010g010658.A	0	0	0	0	0	0	0	0				Cup000089g038240.A	Cup000028g023328.1	Cup000013g013622.1
Cup000010g010660.A	0	0	0	0	0	0	0	0				Cup000019g018104.1	Cup000005g005539.1	Cup000003g003293.1
Cup000010g010662.A	0	0	0	0	0	0	0	0				Cup000011g011357.1	Cup000148g041881.1	Cup000026g022023.1
Cup000010g010663.A	0	0	0	0	0	0	0	0				Cup000020g018486.1	Cup000011g012018.1	Cup000008g008694.1
Cup000010g010674.A	0	0	0	0	0	0	0	0				Cup000026g022052.1	Cup000097g039185.1	Cup000003g003330.1
Cup000010g010679.A	0	0	0	0	0	0	0	0				Cup000095g038967.1	Cup000001g001071.A	Cup000004g003668.1
Cup000010g010683.A	0	0	0	0	0	0	0	0				Cup000008g008590.1	Cup000034g026323.1	Cup000013g013591.1
Cup000010g010686.A	0	0	0	0	0	0	0	0				Cup000001g000425.1	Cup000013g013564.1	Cup000002g001683.1
Cup000010g010698.1	0	0	0	0	0	0	0	0				Cup000055g033496.1	Cup000013g013299.1	Cup000001g000445.1
Cup000010g010711.1	0	0	0	0	0	0	0	0				Cup000051g032388.1	Cup000081g037303.1	Cup000038g027669.1
Cup000010g010745.A	0	0	0	0	0	0	0	0				Cup000004g003844.A	Cup000009g009280.1	Cup000026g022301.1
Cup000010g010775.A	0	0	0	0	0	0	0	0				Cup000010g010656.1	Cup000008g008557.1	Cup000038g028065.1
Cup000010g010793.1	0	0	0	0	0	0	0	0				Cup000022g020106.1	Cup000018g017560.1	Cup000004g003756.1
Cup000010g010809.A	0	0	0	0	0	0	0	0				Cup000025g021745.1	Cup000002g001613.1	Cup000056g033745.1
Cup000010g010810.1	0	0	0	0	0	0	0	0				Cup000057g034082.1	Cup000026g022267.1	Cup000004g004412.1
Cup000010g010831.A	0	0	0	0	0	0	0	0				Cup000067g035933.1	Cup000010g010578.1	Cup000004g004398.1
Cup000010g010840.A	0	0	0	0	0	0	0	0				Cup000120g040678.1	Cup000005g005692.A	Cup000160g042303.1
Cup000010g010858.1	0	0	0	0	0	0	0	0				Cup000051g032555.1	Cup000003g003385.1	Cup000942g045394.1
Cup000010g010863.A	0	0	0	0	0	0	0	0				Cup000028g023123.1	Cup000025g021615.1	Cup000038g027802.A
Cup000010g010902.A	0	0	0	0	0	0	0	0				Cup000014g014213.1	Cup000007g007156.A	Cup000040g028708.1
Cup000010g010914.1	0	0	0	0	0	0	0	0				Cup000057g033998.1	Cup000026g022247.1	Cup000057g034018.1
Cup000010g010960.1	0	0	0	0	0	0	0	0				Cup000014g014146.A	Cup000009g009004.1	Cup000025g021874.1
Cup000010g011020.1	0	0	0	0	0	0	0	0				Cup000001g000232.1	Cup000316g044149.1	Cup000055g033575.1
Cup000010g011022.1	0	0	0	0	0	0	0	0				Cup000004g004573.1	Cup000009g009073.1	Cup000042g029619.A
Cup000010g011028.A	0	0	0	0	0	0	0	0				Cup000033g025693.1	Cup000033g025699.1	Cup000053g033015.1
Cup000010g011031.A	0	0	0	0	0	0	0	0				Cup000014g014569.1	Cup000001g000912.1	Cup000008g008203.1
Cup000010g011039.1	0	0	0	0	0	0	0	0				Cup000028g022998.1	Cup000010g010312.1	Cup000047g031409.1
Cup000010g011040.A	0	0	0	0	0	0	0	0				Cup000028g023139.1	Cup000003g002619.1	Cup000001g001213.1
Cup000010g011043.A	0	0	0	0	0	0	0	0				Cup000002g001611.1	Cup004515g046669.A	Cup000004g004446.1
Cup000010g011048.A	0	0	0	0	0	0	0	0				Cup000001g000227.1	Cup000013g013118.1	Cup000026g022261.1
Cup000010g011049.1	0	0	0	0	0	0	0	0				Cup000021g019110.1	Cup000020g018765.A	Cup000007g007522.A
Cup000010g011053.A	0	0	0	0	0	0	0	0				Cup000693g045065.1	Cup000022g020029.1	Cup000037g027327.1
Cup000010g011056.1	0	0	0	0	0	0	0	0				Cup000012g012860.1	Cup000024g020725.1	Cup000041g029121.1
Cup000010g011066.A	0	0	0	0	0	0	0	0				Cup000024g020774.1	Cup000048g031807.1	Cup000017g016345.1
Cup000010g011068.1	0	0	0	0	0	0	0	0				Cup000038g027785.1	Cup000010g010410.1	Cup000003g003173.1
Cup000010g011075.1	0	0	0	0	0	0	0	0				Cup000051g032624.1	Cup000136g041365.1	Cup000001g001267.A
Cup000010g011077.A	0	0	0	0	0	0	0	0				Cup000045g030630.A	Cup000142g041597.1	Cup000008g008614.1
Cup000010g011079.A	0	0	0	0	0	0	0	0				Cup000051g032622.1	Cup000086g038020.A	Cup000085g037859.1
Cup000010g011084.A	0	0	0	0	0	0	0	0				Cup000208g043437.1	Cup000004g004588.1	Cup000020g018606.1
Cup000010g011092.1	0	0	0	0	0	0	0	0				Cup000004g004272.A	Cup000007g007723.A	Cup000014g014306.1
Cup000010g011093.1	0	0	0	0	0	0	0	0				Cup000011g011262.1	Cup000481g044691.1	Cup000025g021293.1
Cup000010g011105.A	0	0	0	0	0	0	0	0				Cup000024g020805.1	Cup000033g025934.A	Cup000038g027764.1
Cup000010g011106.1	0	0	0	0	0	0	0	0				Cup000195g043248.1	Cup000010g010160.1	Cup000032g025314.1
Cup000010g011121.1	0	0	0	0	0	0	0	0				Cup000003g002591.1	Cup000054g033231.1	Cup000021g019231.1
Cup000010g011131.1	0	0	0	0	0	0	0	0				Cup000013g013071.A	Cup000042g029639.A	Cup000004g004210.A
Cup000010g011142.1	0	0	0	0	0	0	0	0				Cup000090g038270.1	Cup000007g007431.A	Cup000468g044657.1
Cup000010g011149.1	0	0	0	0	0	0	0	0				Cup000019g017765.1	Cup000013g013072.1	Cup000025g021836.1
Cup000010g011151.A	0	0	0	0	0	0	0	0				Cup000017g016890.1	Cup000042g029737.1	Cup000015g014995.1
Cup000010g011153.1	0	0	0	0	0	0	0	0				Cup000086g037925.1	Cup000058g034119.1	Cup000027g022556.1
Cup000010g011157.A	0	0	0	0	0	0	0	0				Cup000045g030837.1	Cup000026g021951.1	Cup000007g007181.A
Cup000011g011204.1	0	0	0	0	0	0	0	0				Cup000022g019702.1	Cup000030g024442.A	Cup000042g029659.1
Cup000011g011211.A	0	0	0	0	0	0	0	0				Cup000057g034023.1	Cup000105g039859.1	Cup000001g000222.1
Cup000011g011232.1	0	0	0	0	0	0	0	0				Cup000030g024432.1	Cup000030g024098.1	Cup000042g029471.1
Cup000011g011239.1	0	0	0	0	0	0	0	0				Cup000067g035929.1	Cup000072g036404.1	Cup000031g024839.1
Cup000011g011259.A	0	0	0	0	0	0	0	0				Cup000031g024953.1	Cup000086g037888.1	Cup000010g010136.1
Cup000011g011260.1	0	0	0	0	0	0	0	0				Cup000027g022705.1	Cup000037g027520.1	Cup000180g042926.1
Cup000011g011279.1	0	0	0	0	0	0	0	0				Cup000014g014426.A	Cup000132g041152.A	Cup000008g008775.1
Cup000011g011298.1	0	0	0	0	0	0	0	0				Cup000040g028787.1	Cup000011g011444.1	Cup000834g045274.1
Cup000011g011320.1	0	0	0	0	0	0	0	0				Cup000042g029739.1	Cup000140g041508.1	Cup000072g036514.A
Cup000011g011409.1	0	0	0	0	0	0	0	0				Cup000020g018450.A	Cup000033g026013.1	Cup000035g026668.1
Cup000011g011423.A	0	0	0	0	0	0	0	0				Cup000013g013124.1	Cup000036g027200.1	Cup000001g000255.A
Cup000011g011427.A	0	0	0	0	0	0	0	0				Cup000305g044108.1	Cup000905g045355.1	Cup000030g024418.A
Cup000011g011429.1	0	0	0	0	0	0	0	0				Cup000175g042841.A	Cup000014g014348.1	Cup000047g031445.1
Cup000011g011435.1	0	0	0	0	0	0	0	0				Cup000046g031001.1	Cup000069g036069.1	Cup000038g027678.1
Cup000011g011450.A	0	0	0	0	0	0	0	0				Cup000006g006201.1	Cup000007g007819.1	Cup000011g011564.A
Cup000011g011470.1	0	0	0	0	0	0	0	0				Cup000040g028782.1	Cup000090g038295.A	Cup000001g000960.1
Cup000011g011493.1	0	0	0	0	0	0	0	0				Cup000143g041629.1	Cup000013g013632.1	Cup000012g012346.1
Cup000011g011505.1	0	0	0	0	0	0	0	0				Cup000046g031319.1	Cup000042g029771.A	Cup000042g029716.1
Cup000011g011514.A	0	0	0	0	0	0	0	0				Cup000047g031560.1	Cup000038g027964.1	Cup000030g024466.A
Cup000011g011520.1	0	0	0	0	0	0	0	0				Cup000092g038555.A	Cup000018g017221.1	Cup000020g018871.1
Cup000011g011521.A	0	0	0	0	0	0	0	0				Cup000020g018899.1	Cup000032g025373.A	Cup000016g015916.1
Cup000011g011526.A	0	0	0	0	0	0	0	0				Cup000003g002939.1	Cup000020g018591.1	Cup000010g010279.1
Cup000011g011534.A	0	0	0	0	0	0	0	0				Cup000016g015572.1	Cup000086g037989.1	Cup000018g017134.1
Cup000011g011537.A	0	0	0	0	0	0	0	0				Cup000038g027925.1	Cup000159g042266.1	Cup000016g015594.1
Cup000011g011541.1	0	0	0	0	0	0	0	0				Cup000040g028539.1	Cup000077g036984.1	Cup000140g041503.1
Cup000011g011543.A	0	0	0	0	0	0	0	0				Cup000001g000128.1	Cup000014g014712.1	Cup000005g005677.A
Cup000011g011567.A	0	0	0	0	0	0	0	0				Cup000092g038534.1	Cup000045g030849.1	Cup000004g003845.1
Cup000011g011579.A	0	0	0	0	0	0	0	0				Cup000117g040534.A	Cup000083g037523.1	Cup000107g040003.1
Cup000011g011580.1	0	0	0	0	0	0	0	0				Cup000141g041561.1	Cup000560g044862.1	Cup000003g003168.1
Cup000011g011586.A	0	0	0	0	0	0	0	0				Cup000140g041500.1	Cup000055g033477.1	Cup000057g034072.1
Cup000011g011587.A	0	0	0	0	0	0	0	0				Cup000022g019940.1	Cup000169g042608.1	Cup000158g042219.A
Cup000011g011588.A	0	0	0	0	0	0	0	0				Cup000033g025987.1	Cup000019g017890.1	Cup000052g032920.1
Cup000011g011589.A	0	0	0	0	0	0	0	0				Cup000074g036732.1	Cup000039g028390.1	Cup000028g022997.1
Cup000011g011593.1	0	0	0	0	0	0	0	0				Cup000022g019747.1	Cup000024g020999.1	Cup000175g042802.1
Cup000011g011601.A	0	0	0	0	0	0	0	0				Cup000033g025615.1	Cup000001g000874.1	Cup000009g009708.1
Cup000011g011610.A	0	0	0	0	0	0	0	0				Cup000042g029676.A	Cup000039g028425.1	Cup000022g019773.1
Cup000011g011620.1	0	0	0	0	0	0	0	0				Cup000015g015190.1	Cup000091g038427.1	Cup000083g037437.1
Cup000011g011621.A	0	0	0	0	0	0	0	0				Cup000051g032584.1	Cup000037g027603.1	Cup000006g006076.1
Cup000011g011625.1	0	0	0	0	0	0	0	0				Cup000004g003980.1	Cup000010g010795.1	Cup000004g003837.1
Cup000011g011640.1	0	0	0	0	0	0	0	0				Cup000091g038430.1	Cup000004g004737.1	Cup000084g037634.1
Cup000011g011642.A	0	0	0	0	0	0	0	0				Cup000058g034186.1	Cup000010g010963.1	Cup000004g004230.A
Cup000011g011648.A	0	0	0	0	0	0	0	0				Cup000024g020775.1	Cup000009g009906.1	Cup000048g031796.1
Cup000011g011658.1	0	0	0	0	0	0	0	0				Cup000094g038877.1	Cup000010g010333.1	Cup000110g040234.1
Cup000011g011660.1	0	0	0	0	0	0	0	0				Cup000044g030195.1	Cup000019g018177.1	Cup000025g021614.A
Cup000011g011663.A	0	0	0	0	0	0	0	0				Cup000019g017921.1	Cup000066g035593.1	Cup000171g042697.1
Cup000011g011666.A	0	0	0	0	0	0	0	0				Cup000022g019690.1	Cup000053g033119.1	Cup000063g035081.1
Cup000011g011671.A	0	0	0	0	0	0	0	0				Cup000066g035606.1	Cup000033g026003.1	Cup000080g037258.1
Cup000011g011686.A	0	0	0	0	0	0	0	0				Cup000033g025547.1	Cup000032g025137.1	Cup000103g039604.1
Cup000011g011687.A	0	0	0	0	0	0	0	0				Cup000071g036314.1	Cup000003g003390.1	Cup000001g000259.1
Cup000011g011690.1	0	0	0	0	0	0	0	0				Cup000003g003126.1	Cup000004g003735.1	Cup000031g024573.1
Cup000011g011695.A	0	0	0	0	0	0	0	0				Cup000017g016354.1	Cup000834g045276.1	Cup000011g011188.A
Cup000011g011696.A	0	0	0	0	0	0	0	0				Cup000013g013075.1	Cup000014g014224.1	Cup000004g004261.1
Cup000011g011703.A	0	0	0	0	0	0	0	0				Cup000032g025109.1	Cup000003g003223.1	Cup000006g006185.1
Cup000011g011707.1	0	0	0	0	0	0	0	0				Cup000013g013172.1	Cup000060g034326.A	Cup000056g033831.1
Cup000011g011736.1	0	0	0	0	0	0	0	0				Cup000035g026618.1	Cup000053g033010.A	Cup000052g032781.1
Cup000011g011744.A	0	0	0	0	0	0	0	0				Cup000015g015266.1	Cup000039g028439.1	Cup000044g030227.1
Cup000011g011746.1	0	0	0	0	0	0	0	0				Cup000097g039195.1	Cup000056g033834.1	Cup000005g005649.1
Cup000011g011753.1	0	0	0	0	0	0	0	0				Cup000030g024285.1	Cup000004g004291.1	Cup000035g026675.1
Cup000011g011782.A	0	0	0	0	0	0	0	0				Cup000001g000237.1	Cup000095g038920.1	Cup000011g011938.1
Cup000011g011785.1	0	0	0	0	0	0	0	0				Cup000022g019989.1	Cup000010g010987.1	Cup000011g011383.1
Cup000011g011789.A	0	0	0	0	0	0	0	0				Cup000019g017835.1	Cup000001g000334.1	Cup000042g029650.1
Cup000011g011825.A	0	0	0	0	0	0	0	0				Cup000152g042032.1	Cup000006g006360.1	Cup000020g018740.1
Cup000011g011829.A	0	0	0	0	0	0	0	0				Cup000013g013567.1	Cup000086g038001.1	Cup000041g029296.1
Cup000011g011907.1	0	0	0	0	0	0	0	0				Cup000023g020476.1	Cup000054g033359.1	Cup000007g007656.1
Cup000011g011926.1	0	0	0	0	0	0	0	0				Cup000011g011762.A	Cup000001g000935.1	Cup000011g011225.1
Cup000011g011937.1	0	0	0	0	0	0	0	0				Cup000084g037692.1	Cup000065g035314.1	Cup000060g034557.1
Cup000011g011939.1	0	0	0	0	0	0	0	0				Cup000006g006161.1	Cup000003g003268.1	Cup000030g024437.1
Cup000011g011948.1	0	0	0	0	0	0	0	0				Cup000009g009138.1	Cup000013g013537.1	Cup000053g033009.1
Cup000011g011956.A	0	0	0	0	0	0	0	0				Cup000273g043978.A	Cup000020g018762.1	Cup000010g010834.1
Cup000011g011984.1	0	0	0	0	0	0	0	0				Cup000009g009090.1	Cup000056g033822.1	Cup000289g044046.1
Cup000011g011991.A	0	0	0	0	0	0	0	0				Cup000010g010877.1	Cup000007g007842.1	Cup000030g023970.1
Cup000011g012004.1	0	0	0	0	0	0	0	0				Cup000027g022762.A	Cup000085g037847.1	Cup000025g021744.1
Cup000011g012010.1	0	0	0	0	0	0	0	0				Cup000051g032572.A	Cup000005g005477.1	Cup000011g012020.1
Cup000011g012044.1	0	0	0	0	0	0	0	0				Cup000130g041064.1	Cup000001g001172.1	Cup000020g018880.1
Cup000011g012053.A	0	0	0	0	0	0	0	0				Cup000097g039189.1	Cup000018g017522.1	Cup000010g010460.1
Cup000011g012060.1	0	0	0	0	0	0	0	0				Cup000057g033941.1	Cup000051g032346.1	Cup000006g006855.1
Cup000011g012069.A	0	0	0	0	0	0	0	0				Cup000130g041093.1	Cup000096g039066.1	Cup000599g044913.1
Cup000011g012071.A	0	0	0	0	0	0	0	0				Cup000015g015259.1	Cup000024g021127.1	Cup000005g005517.1
Cup000011g012072.1	0	0	0	0	0	0	0	0				Cup000006g006770.1	Cup000008g008584.1	Cup000006g006267.1
Cup000011g012076.1	0	0	0	0	0	0	0	0				Cup000028g023252.1	Cup000104g039723.A	Cup000038g027827.A
Cup000011g012079.1	0	0	0	0	0	0	0	0				Cup000060g034397.1	Cup000003g002916.1	Cup000018g017610.1
Cup000011g012082.A	0	0	0	0	0	0	0	0				Cup000024g020783.1	Cup000022g020064.1	Cup000017g016331.1
Cup000011g012093.A	0	0	0	0	0	0	0	0				Cup000012g012334.1	Cup000016g015628.1	Cup000037g027539.1
Cup000011g012096.1	0	0	0	0	0	0	0	0				Cup000028g023244.1	Cup000032g025129.1	Cup000008g008556.1
Cup000011g012100.A	0	0	0	0	0	0	0	0				Cup000195g043217.1	Cup000010g010687.A	Cup000002g002506.1
Cup000011g012106.A	0	0	0	0	0	0	0	0				Cup000058g034202.1	Cup000103g039599.1	Cup000100g039384.1
Cup000011g012108.A	0	0	0	0	0	0	0	0				Cup000003g003567.A	Cup000003g002816.1	Cup000020g018626.1
Cup000011g012110.1	0	0	0	0	0	0	0	0				Cup000029g023875.1	Cup000024g021121.1	Cup000017g016333.1
Cup000011g012113.A	0	0	0	0	0	0	0	0				Cup000042g029729.1	Cup000020g018860.1	Cup000006g006733.1
Cup000011g012116.A	0	0	0	0	0	0	0	0				Cup000098g039307.1	Cup000008g008451.1	Cup000006g006356.1
Cup000011g012129.A	0	0	0	0	0	0	0	0				Cup000127g040936.1	Cup000002g001604.1	Cup000009g009317.1
Cup000011g012143.A	0	0	0	0	0	0	0	0				Cup000214g043522.1	Cup000091g038349.1	Cup000043g029897.1
Cup000011g012151.A	0	0	0	0	0	0	0	0				Cup000016g015857.1	Cup000180g042936.1	Cup001018g045469.1
Cup000011g012153.1	0	0	0	0	0	0	0	0				Cup000009g009783.1	Cup000018g017614.A	Cup000022g019898.A
Cup000011g012156.1	0	0	0	0	0	0	0	0				Cup000008g008767.1	Cup000011g011941.1	Cup000026g021906.1
Cup000011g012168.A	0	0	0	0	0	0	0	0				Cup000014g014776.1	Cup000069g036071.A	Cup000025g021312.1
Cup000011g012171.A	0	0	0	0	0	0	0	0				Cup000022g019737.1	Cup000026g022428.1	Cup000081g037345.1
Cup000011g012172.A	0	0	0	0	0	0	0	0				Cup000015g015046.1	Cup000012g012644.A	Cup000061g034649.1
Cup000011g012176.1	0	0	0	0	0	0	0	0				Cup000003g003095.1	Cup000036g027130.1	Cup000013g013244.1
Cup000011g012177.A	0	0	0	0	0	0	0	0				Cup000053g033035.1	Cup000656g045020.1	Cup000017g016394.1
Cup000011g012180.1	0	0	0	0	0	0	0	0				Cup000013g013103.1	Cup000075g036841.1	Cup000007g007279.1
Cup000011g012185.1	0	0	0	0	0	0	0	0				Cup001367g045713.1	Cup000040g028582.1	Cup000014g014704.1
Cup000011g012186.A	0	0	0	0	0	0	0	0				Cup000077g037072.1	Cup000168g042582.1	Cup000001g001169.1
Cup000011g012195.1	0	0	0	0	0	0	0	0				Cup000022g019706.1	Cup000001g000522.1	Cup000012g012828.1
Cup000011g012203.1	0	0	0	0	0	0	0	0				Cup000066g035598.1	Cup000022g020081.1	Cup000064g035269.1
Cup000011g012216.1	0	0	0	0	0	0	0	0				Cup000002g001693.1	Cup000025g021438.A	Cup000006g006494.1
Cup000011g012219.1	0	0	0	0	0	0	0	0				Cup000011g011440.A	Cup000074g036654.1	Cup000044g030471.1
Cup000012g012307.1	0	0	0	0	0	0	0	0				Cup000057g034027.1	Cup000109g040217.1	Cup000028g022993.1
Cup000012g012330.1	0	0	0	0	0	0	0	0				Cup000012g012842.1	Cup000001g000318.A	Cup000020g018531.1
Cup000012g012350.A	0	0	0	0	0	0	0	0				Cup000032g025126.1	Cup000007g007108.1	Cup000001g000531.A
Cup000012g012364.1	0	0	0	0	0	0	0	0				Cup000122g040741.1	Cup000010g010301.1	Cup000017g016830.1
Cup000012g012387.A	0	0	0	0	0	0	0	0				Cup000022g020055.1	Cup000034g026362.1	Cup000006g006303.1
Cup000012g012390.A	0	0	0	0	0	0	0	0				Cup000030g024343.1	Cup000023g020265.1	Cup000037g027271.1
Cup000012g012397.A	0	0	0	0	0	0	0	0				Cup000042g029753.1	Cup000011g011714.1	Cup000001g000873.1
Cup000012g012408.1	0	0	0	0	0	0	0	0				Cup000054g033281.1	Cup000003g002666.1	Cup000006g006643.A
Cup000012g012409.1	0	0	0	0	0	0	0	0				Cup000019g018178.1	Cup000010g010398.A	Cup000041g029313.1
Cup000012g012412.A	0	0	0	0	0	0	0	0				Cup000766g045174.A	Cup000043g029864.1	Cup000213g043498.A
Cup000012g012437.A	0	0	0	0	0	0	0	0				Cup000010g010959.1	Cup000012g012977.A	Cup000038g027631.1
Cup000012g012443.1	0	0	0	0	0	0	0	0				Cup000021g019480.1	Cup000872g045324.1	Cup000003g003348.A
Cup000012g012451.1	0	0	0	0	0	0	0	0				Cup000001g000785.1	Cup002690g046316.A	Cup000007g007812.1
Cup000012g012453.1	0	0	0	0	0	0	0	0				Cup000025g021436.1	Cup000052g032750.A	Cup000005g005573.1
Cup000012g012472.1	0	0	0	0	0	0	0	0				Cup000011g011462.1	Cup000005g005556.1	Cup002638g046296.1
Cup000012g012480.A	0	0	0	0	0	0	0	0				Cup000030g023916.1	Cup000044g030504.1	Cup000020g018559.1
Cup000012g012486.A	0	0	0	0	0	0	0	0				Cup002592g046280.1	Cup000017g016856.1	Cup000052g032987.A
Cup000012g012491.1	0	0	0	0	0	0	0	0				Cup000172g042742.1	Cup000066g035814.1	Cup000017g016412.1
Cup000012g012494.A	0	0	0	0	0	0	0	0				Cup000014g014530.1	Cup000040g028583.1	Cup000006g006978.1
Cup000012g012498.A	0	0	0	0	0	0	0	0				Cup000032g025204.A	Cup000051g032371.1	Cup000047g031438.1
Cup000012g012518.A	0	0	0	0	0	0	0	0				Cup000001g000911.1	Cup000129g041004.1	Cup000040g028962.1
Cup000012g012522.A	0	0	0	0	0	0	0	0				Cup000050g032245.1	Cup000153g042096.1	Cup000031g024958.1
Cup000012g012526.A	0	0	0	0	0	0	0	0				Cup000058g034161.1	Cup000006g006573.1	Cup000103g039688.1
Cup000012g012532.1	0	0	0	0	0	0	0	0				Cup000087g038104.1	Cup000007g007043.1	Cup000040g028757.1
Cup000012g012541.A	0	0	0	0	0	0	0	0				Cup000066g035633.1	Cup000051g032625.1	Cup000180g042904.1
Cup000012g012546.1	0	0	0	0	0	0	0	0				Cup000012g012251.1	Cup000490g044730.1	Cup000008g008937.A
Cup000012g012547.A	0	0	0	0	0	0	0	0				Cup000008g008201.1	Cup000053g033159.A	Cup000044g030208.1
Cup000012g012551.A	0	0	0	0	0	0	0	0				Cup000009g009116.1	Cup000067g035921.1	Cup000017g016874.1
Cup000012g012556.1	0	0	0	0	0	0	0	0				Cup000001g000669.A	Cup000005g005599.A	Cup000140g041515.A
Cup000012g012565.A	0	0	0	0	0	0	0	0				Cup000015g015194.1	Cup000020g018738.1	Cup000153g042103.1
Cup000012g012575.A	0	0	0	0	0	0	0	0				Cup000014g014476.1	Cup000018g017470.1	Cup000027g022636.1
Cup000012g012578.A	0	0	0	0	0	0	0	0				Cup000172g042745.A	Cup000032g025335.1	Cup000050g032311.A
Cup000012g012584.1	0	0	0	0	0	0	0	0				Cup000057g034039.1	Cup000222g043573.1	Cup000012g012232.1
Cup000012g012586.A	0	0	0	0	0	0	0	0				Cup000032g025111.1	Cup000057g033949.1	Cup000043g030141.A
Cup000012g012592.A	0	0	0	0	0	0	0	0				Cup000014g014622.1	Cup000049g032090.1	Cup000034g026416.1
Cup000012g012593.A	0	0	0	0	0	0	0	0				Cup000078g037141.1	Cup000013g013771.1	Cup000003g003211.1
Cup000012g012595.A	0	0	0	0	0	0	0	0				Cup000038g027706.1	Cup000015g015384.A	Cup000024g020758.1
Cup000012g012597.A	0	0	0	0	0	0	0	0				Cup000006g006630.1	Cup000131g041135.1	Cup000088g038165.1
Cup000012g012609.A	0	0	0	0	0	0	0	0				Cup000030g024026.1	Cup000046g031336.1	Cup000032g025128.1
Cup000012g012620.A	0	0	0	0	0	0	0	0				Cup000099g039355.1	Cup000073g036540.1	Cup000004g003772.1
Cup000012g012640.1	0	0	0	0	0	0	0	0				Cup000013g013565.1	Cup000008g008576.1	Cup000039g028372.1
Cup000012g012657.1	0	0	0	0	0	0	0	0				Cup000019g018084.1	Cup000383g044405.A	Cup000117g040526.1
Cup000012g012684.A	0	0	0	0	0	0	0	0				Cup000076g036872.A	Cup000006g006876.A	Cup000017g016876.A
Cup000012g012689.A	0	0	0	0	0	0	0	0				Cup000086g037931.1	Cup000107g040018.1	Cup000108g040158.1
Cup000012g012704.A	0	0	0	0	0	0	0	0				Cup000024g021217.A	Cup000068g035978.1	Cup000014g014678.1
Cup000012g012707.1	0	0	0	0	0	0	0	0				Cup000014g014743.1	Cup000056g033824.1	Cup000028g022914.1
Cup000012g012717.1	0	0	0	0	0	0	0	0				Cup000006g006355.1	Cup000035g026980.A	Cup000019g017836.A
Cup000012g012761.1	0	0	0	0	0	0	0	0				Cup000061g034668.1	Cup000003g002686.1	Cup000020g018608.1
Cup000012g012780.1	0	0	0	0	0	0	0	0				Cup000022g020071.1	Cup000032g025359.1	Cup000072g036394.1
Cup000012g012786.1	0	0	0	0	0	0	0	0				Cup000050g032203.1	Cup000024g020713.A	Cup000006g006068.1
Cup000012g012791.A	0	0	0	0	0	0	0	0				Cup000124g040830.1	Cup000004g004257.1	Cup000030g024473.A
Cup000012g012795.1	0	0	0	0	0	0	0	0				Cup000083g037441.1	Cup000026g022221.1	Cup000006g006557.A
Cup000012g012796.1	0	0	0	0	0	0	0	0				Cup000068g036025.1	Cup000114g040370.1	Cup000039g028436.1
Cup000012g012797.1	0	0	0	0	0	0	0	0				Cup000100g039360.1	Cup000071g036312.1	Cup004037g046605.1
Cup000012g012798.1	0	0	0	0	0	0	0	0				Cup000023g020324.1	Cup000003g003165.1	Cup000041g029107.1
Cup000012g012799.1	0	0	0	0	0	0	0	0				Cup000018g017176.1	Cup000041g029268.1	Cup000028g023215.1
Cup000012g012800.1	0	0	0	0	0	0	0	0				Cup000122g040785.A	Cup000026g022268.1	Cup000086g037923.1
Cup000012g012850.1	0	0	0	0	0	0	0	0				Cup000002g001585.1	Cup000083g037560.1	Cup000017g016700.1
Cup000012g012857.1	0	0	0	0	0	0	0	0				Cup000052g032778.1	Cup000003g003131.1	Cup000001g000826.1
Cup000012g012867.A	0	0	0	0	0	0	0	0				Cup000014g014108.1	Cup000039g028356.1	Cup000457g044620.1
Cup000012g012869.A	0	0	0	0	0	0	0	0				Cup000011g011841.1	Cup000005g004886.1	Cup000011g011722.1
Cup000012g012872.1	0	0	0	0	0	0	0	0				Cup000024g020712.1	Cup000013g013303.1	Cup000175g042823.1
Cup000012g012876.1	0	0	0	0	0	0	0	0				Cup000003g003192.1	Cup000046g031203.1	Cup000008g008227.A
Cup000012g012879.1	0	0	0	0	0	0	0	0				Cup000016g015906.1	Cup000001g000913.1	Cup000001g000021.A
Cup000012g012880.A	0	0	0	0	0	0	0	0				Cup000039g028410.1	Cup000020g018492.1	Cup000039g028218.1
Cup000012g012893.1	0	0	0	0	0	0	0	0				Cup000331g044229.1	Cup000130g041091.1	Cup000015g015278.1
Cup000012g012906.A	0	0	0	0	0	0	0	0				Cup000043g029870.1	Cup000108g040148.1	Cup000001g000958.1
Cup000012g012914.1	0	0	0	0	0	0	0	0				Cup000046g031266.1	Cup000026g021940.1	Cup000052g032751.1
Cup000012g012920.A	0	0	0	0	0	0	0	0				Cup000030g024456.A	Cup000041g029278.A	Cup000018g017203.1
Cup000012g012921.A	0	0	0	0	0	0	0	0				Cup000038g027707.1	Cup000119g040576.1	Cup000013g013061.1
Cup000012g012933.1	0	0	0	0	0	0	0	0				Cup000044g030385.1	Cup000003g003210.1	Cup000135g041317.1
Cup000012g012938.A	0	0	0	0	0	0	0	0				Cup000029g023669.1	Cup000027g022723.1	Cup000069g036145.1
Cup000012g012939.1	0	0	0	0	0	0	0	0				Cup000009g009345.1	Cup000003g003246.1	Cup000092g038507.1
Cup000012g012945.1	0	0	0	0	0	0	0	0				Cup000009g009871.1	Cup000007g007088.1	Cup000092g038664.A
Cup000012g012952.A	0	0	0	0	0	0	0	0				Cup000172g042744.1	Cup000039g028492.1	Cup000013g013835.A
Cup000012g012957.1	0	0	0	0	0	0	0	0				Cup000027g022761.1	Cup000012g012656.1	Cup000049g032121.1
Cup000012g012959.1	0	0	0	0	0	0	0	0				Cup000035g026713.A	Cup000026g022258.1	Cup000007g007257.1
Cup000012g012965.1	0	0	0	0	0	0	0	0				Cup000138g041415.1	Cup000021g019423.1	Cup000077g037046.1
Cup000012g012976.1	0	0	0	0	0	0	0	0				Cup000103g039621.1	Cup000020g018588.1	Cup000019g017804.1
Cup000013g012994.1	0	0	0	0	0	0	0	0				Cup000057g034020.1	Cup000066g035735.1	Cup000031g024834.1
Cup000013g013003.A	0	0	0	0	0	0	0	0				Cup000009g009123.1	Cup000030g024102.1	Cup005156g046744.1
Cup000013g013011.A	0	0	0	0	0	0	0	0				Cup000070g036274.A	Cup000017g016489.A	Cup000002g002086.1
Cup000013g013025.A	0	0	0	0	0	0	0	0				Cup000037g027475.1	Cup000214g043520.1	Cup000027g022606.1
Cup000013g013036.A	0	0	0	0	0	0	0	0				Cup000035g026709.1	Cup000029g023541.1	Cup000013g013775.1
Cup000013g013051.1	0	0	0	0	0	0	0	0				Cup000001g000397.1	Cup000001g000843.1	Cup000021g019237.1
Cup000013g013058.1	0	0	0	0	0	0	0	0				Cup000161g042318.1	Cup000025g021796.1	Cup000010g010213.1
Cup000013g013077.A	0	0	0	0	0	0	0	0				Cup000031g024954.1	Cup000006g006332.1	Cup000028g023218.1
Cup000013g013101.1	0	0	0	0	0	0	0	0				Cup000045g030697.1	Cup000013g013724.1	Cup000108g040188.1
Cup000013g013114.1	0	0	0	0	0	0	0	0				Cup000067g035922.A	Cup000014g014210.1	Cup000001g000121.1
Cup000013g013131.1	0	0	0	0	0	0	0	0				Cup000035g026824.1	Cup000006g006064.1	Cup000030g024078.1
Cup000013g013146.A	0	0	0	0	0	0	0	0				Cup000048g031788.1	Cup000010g010409.1	Cup000011g011208.1
Cup000013g013160.1	0	0	0	0	0	0	0	0				Cup000011g011859.1	Cup000021g019120.1	Cup000010g010265.1
Cup000013g013178.1	0	0	0	0	0	0	0	0				Cup000784g045204.1	Cup000013g013060.1	Cup000044g030427.1
Cup000013g013200.1	0	0	0	0	0	0	0	0				Cup000031g024593.1	Cup000009g009444.1	Cup000012g012734.1
Cup000013g013208.1	0	0	0	0	0	0	0	0				Cup000013g013729.1	Cup000122g040789.A	Cup000088g038171.1
Cup000013g013213.A	0	0	0	0	0	0	0	0				Cup000044g030215.1	Cup000004g003951.1	Cup000061g034661.1
Cup000013g013221.A	0	0	0	0	0	0	0	0				Cup000007g007707.1	Cup000103g039687.1	Cup000003g003318.1
Cup000013g013222.A	0	0	0	0	0	0	0	0				Cup000104g039819.A	Cup000020g018666.1	Cup000061g034761.1
Cup000013g013239.A	0	0	0	0	0	0	0	0				Cup000043g029976.A	Cup000014g014541.1	Cup000089g038240.A
Cup000013g013255.A	0	0	0	0	0	0	0	0				Cup000013g013196.1	Cup000017g016678.1	Cup000019g018104.1
Cup000013g013268.A	0	0	0	0	0	0	0	0				Cup000001g001160.1	Cup000002g002081.1	Cup000011g011357.1
Cup000013g013269.A	0	0	0	0	0	0	0	0				Cup000023g020351.1	Cup000135g041335.1	Cup000020g018486.1
Cup000013g013270.A	0	0	0	0	0	0	0	0				Cup000025g021303.1	Cup000008g008251.A	Cup000026g022052.1
Cup000013g013275.1	0	0	0	0	0	0	0	0				Cup000083g037586.A	Cup000011g011481.1	Cup000095g038967.1
Cup000013g013288.1	0	0	0	0	0	0	0	0				Cup000033g025644.1	Cup000120g040674.A	Cup000008g008590.1
Cup000013g013289.A	0	0	0	0	0	0	0	0				Cup000024g020737.1	Cup000010g010984.1	Cup000001g000425.1
Cup000013g013310.1	0	0	0	0	0	0	0	0				Cup000044g030582.1	Cup003686g046553.1	Cup000055g033496.1
Cup000013g013311.1	0	0	0	0	0	0	0	0				Cup000018g017665.A	Cup000040g028726.1	Cup000051g032388.1
Cup000013g013322.1	0	0	0	0	0	0	0	0				Cup000812g045246.1	Cup000008g008235.1	Cup000004g003844.A
Cup000013g013325.A	0	0	0	0	0	0	0	0				Cup000025g021286.A	Cup000051g032358.1	Cup000010g010656.1
Cup000013g013332.1	0	0	0	0	0	0	0	0				Cup000004g003906.1	Cup000141g041566.1	Cup000022g020106.1
Cup000013g013333.1	0	0	0	0	0	0	0	0				Cup000030g024055.1	Cup000107g040083.1	Cup000025g021745.1
Cup000013g013334.A	0	0	0	0	0	0	0	0				Cup000008g008736.1	Cup000062g034932.1	Cup000057g034082.1
Cup000013g013336.1	0	0	0	0	0	0	0	0				Cup000093g038781.1	Cup000001g001288.1	Cup000067g035933.1
Cup000013g013337.1	0	0	0	0	0	0	0	0				Cup000038g027756.1	Cup000065g035432.1	Cup000120g040678.1
Cup000013g013339.A	0	0	0	0	0	0	0	0				Cup000011g011398.1	Cup000017g016845.1	Cup000051g032555.1
Cup000013g013340.A	0	0	0	0	0	0	0	0				Cup000020g018475.1	Cup000021g019200.1	Cup000028g023123.1
Cup000013g013341.A	0	0	0	0	0	0	0	0				Cup000091g038350.1	Cup000076g036914.1	Cup000014g014213.1
Cup000013g013342.1	0	0	0	0	0	0	0	0				Cup000002g002062.1	Cup000023g020360.A	Cup000057g033998.1
Cup000013g013347.A	0	0	0	0	0	0	0	0				Cup000107g040024.1	Cup000169g042610.1	Cup000014g014146.A
Cup000013g013349.1	0	0	0	0	0	0	0	0				Cup000081g037332.1	Cup000040g028798.1	Cup000001g000232.1
Cup000013g013357.A	0	0	0	0	0	0	0	0				Cup000009g010071.A	Cup000020g018768.A	Cup000004g004573.1
Cup000013g013359.A	0	0	0	0	0	0	0	0				Cup000008g008568.1	Cup000159g042284.A	Cup000033g025693.1
Cup000013g013363.1	0	0	0	0	0	0	0	0				Cup000055g033469.1	Cup000001g000095.A	Cup000014g014569.1
Cup000013g013366.1	0	0	0	0	0	0	0	0				Cup000032g025110.1	Cup000009g009576.1	Cup000028g022998.1
Cup000013g013367.1	0	0	0	0	0	0	0	0				Cup000018g017193.1	Cup000022g019661.1	Cup000028g023139.1
Cup000013g013368.A	0	0	0	0	0	0	0	0				Cup000065g035442.1	Cup000067g035938.1	Cup000002g001611.1
Cup000013g013369.A	0	0	0	0	0	0	0	0				Cup000004g003998.1	Cup000002g002368.1	Cup000001g000227.1
Cup000013g013383.1	0	0	0	0	0	0	0	0				Cup000196g043270.1	Cup000015g014987.1	Cup000021g019110.1
Cup000013g013385.A	0	0	0	0	0	0	0	0				Cup000008g008686.1	Cup000010g010445.1	Cup000693g045065.1
Cup000013g013392.A	0	0	0	0	0	0	0	0				Cup000116g040467.1	Cup000061g034757.1	Cup000012g012860.1
Cup000013g013401.A	0	0	0	0	0	0	0	0				Cup000020g018543.1	Cup000031g024779.A	Cup000024g020774.1
Cup000013g013422.A	0	0	0	0	0	0	0	0				Cup000057g033984.A	Cup000013g013694.1	Cup000038g027785.1
Cup000013g013427.1	0	0	0	0	0	0	0	0				Cup000033g025616.1	Cup000065g035462.1	Cup000051g032624.1
Cup000013g013428.A	0	0	0	0	0	0	0	0				Cup000003g003175.1	Cup000012g012245.1	Cup000045g030630.A
Cup000013g013429.A	0	0	0	0	0	0	0	0				Cup000021g019221.1	Cup000042g029696.1	Cup000051g032622.1
Cup000013g013444.1	0	0	0	0	0	0	0	0				Cup000011g011749.1	Cup002779g046351.A	Cup000208g043437.1
Cup000013g013449.A	0	0	0	0	0	0	0	0				Cup000025g021804.1	Cup000133g041199.1	Cup000041g029231.1
Cup000013g013452.1	0	0	0	0	0	0	0	0				Cup000170g042684.A	Cup000013g013138.1	Cup000004g004272.A
Cup000013g013467.1	0	0	0	0	0	0	0	0				Cup000074g036754.1	Cup000014g014200.1	Cup000011g011262.1
Cup000013g013471.A	0	0	0	0	0	0	0	0				Cup000124g040828.1	Cup000002g002111.1	Cup000024g020805.1
Cup000013g013475.A	0	0	0	0	0	0	0	0				Cup000084g037623.1	Cup000011g011805.A	Cup000195g043248.1
Cup000013g013478.1	0	0	0	0	0	0	0	0				Cup000026g022045.1	Cup000104g039823.1	Cup000003g002591.1
Cup000013g013485.A	0	0	0	0	0	0	0	0				Cup000019g017791.1	Cup000143g041661.1	Cup000013g013071.A
Cup000013g013501.1	0	0	0	0	0	0	0	0				Cup000154g042117.1	Cup000042g029750.1	Cup000090g038270.1
Cup000013g013512.A	0	0	0	0	0	0	0	0				Cup000048g031651.1	Cup000005g005760.1	Cup000019g017765.1
Cup000013g013519.A	0	0	0	0	0	0	0	0				Cup000013g013624.1	Cup000041g029096.1	Cup000017g016890.1
Cup000013g013520.1	0	0	0	0	0	0	0	0				Cup000001g000224.1	Cup000011g011945.1	Cup000086g037925.1
Cup000013g013524.A	0	0	0	0	0	0	0	0				Cup000014g014634.1	Cup000056g033843.1	Cup000045g030837.1
Cup000013g013527.A	0	0	0	0	0	0	0	0				Cup000016g015582.1	Cup000102g039526.1	Cup000022g019702.1
Cup000013g013534.1	0	0	0	0	0	0	0	0				Cup000058g034168.1	Cup000028g023232.1	Cup000057g034023.1
Cup000013g013559.1	0	0	0	0	0	0	0	0				Cup000092g038513.1	Cup000007g007212.1	Cup000030g024432.1
Cup000013g013573.1	0	0	0	0	0	0	0	0				Cup000013g013732.1	Cup000029g023761.1	Cup000196g043271.1
Cup000013g013589.1	0	0	0	0	0	0	0	0				Cup000014g014191.1	Cup000041g029235.1	Cup000067g035929.1
Cup000013g013600.A	0	0	0	0	0	0	0	0				Cup000055g033584.A	Cup000019g017752.A	Cup000014g014629.1
Cup000013g013606.1	0	0	0	0	0	0	0	0				Cup000009g009131.1	Cup000134g041254.1	Cup000031g024953.1
Cup000013g013608.1	0	0	0	0	0	0	0	0				Cup000019g017945.1	Cup000056g033716.A	Cup000027g022705.1
Cup000013g013665.1	0	0	0	0	0	0	0	0				Cup000083g037509.1	Cup000002g001493.1	Cup000025g021621.1
Cup000013g013675.A	0	0	0	0	0	0	0	0				Cup000030g023969.1	Cup000016g015431.1	Cup000014g014426.A
Cup000013g013679.1	0	0	0	0	0	0	0	0				Cup000153g042059.1	Cup000037g027448.1	Cup000040g028787.1
Cup000013g013689.1	0	0	0	0	0	0	0	0				Cup000002g001492.1	Cup000013g013823.1	Cup000042g029739.1
Cup000013g013738.A	0	0	0	0	0	0	0	0				Cup000103g039675.A	Cup000001g000331.1	Cup000020g018450.A
Cup000013g013776.1	0	0	0	0	0	0	0	0				Cup000018g017186.1	Cup000074g036684.1	Cup000013g013124.1
Cup000013g013777.1	0	0	0	0	0	0	0	0				Cup000008g008155.A	Cup000012g012419.1	Cup000028g022899.1
Cup000013g013817.A	0	0	0	0	0	0	0	0				Cup000065g035464.1	Cup000196g043273.1	Cup000305g044108.1
Cup000013g013825.A	0	0	0	0	0	0	0	0				Cup000091g038362.1	Cup000024g020701.1	Cup000175g042841.A
Cup000013g013827.1	0	0	0	0	0	0	0	0				Cup000021g019144.1	Cup000006g006697.1	Cup000046g031001.1
Cup000013g013834.1	0	0	0	0	0	0	0	0				Cup000029g023814.1	Cup000013g013769.1	Cup000006g006201.1
Cup000013g013856.1	0	0	0	0	0	0	0	0				Cup000065g035341.1	Cup000065g035425.1	Cup000040g028782.1
Cup000013g013866.1	0	0	0	0	0	0	0	0				Cup000022g020062.1	Cup000001g000321.1	Cup000143g041629.1
Cup000013g013873.1	0	0	0	0	0	0	0	0				Cup000002g002412.1	Cup000007g007183.1	Cup000046g031319.1
Cup000013g013880.1	0	0	0	0	0	0	0	0				Cup000050g032278.A	Cup000043g030063.1	Cup000047g031560.1
Cup000013g013886.1	0	0	0	0	0	0	0	0				Cup000031g024956.1	Cup000106g039947.1	Cup000092g038555.A
Cup000013g013895.A	0	0	0	0	0	0	0	0				Cup000040g028830.A	Cup000001g000229.1	Cup000020g018899.1
Cup000013g013900.1	0	0	0	0	0	0	0	0				Cup000051g032550.1	Cup000035g026868.1	Cup000003g002939.1
Cup000013g013908.A	0	0	0	0	0	0	0	0				Cup000001g000350.1	Cup000005g005189.1	Cup000016g015572.1
Cup000013g013909.1	0	0	0	0	0	0	0	0				Cup000027g022510.1	Cup000026g022022.1	Cup000038g027925.1
Cup000013g013915.1	0	0	0	0	0	0	0	0				Cup000066g035572.1	Cup000008g008121.1	Cup000040g028539.1
Cup000013g013919.A	0	0	0	0	0	0	0	0				Cup000007g007418.A	Cup000013g013739.1	Cup000001g000128.1
Cup000013g013920.A	0	0	0	0	0	0	0	0				Cup000006g006269.1	Cup000004g003961.1	Cup000063g035080.1
Cup000013g013928.1	0	0	0	0	0	0	0	0				Cup000010g010482.1	Cup000032g025382.1	Cup000092g038534.1
Cup000013g013930.A	0	0	0	0	0	0	0	0				Cup000010g010267.1	Cup000186g043049.1	Cup000117g040534.A
Cup000013g013934.1	0	0	0	0	0	0	0	0				Cup000025g021311.1	Cup000090g038283.1	Cup000141g041561.1
Cup000013g013939.A	0	0	0	0	0	0	0	0				Cup000003g002707.1	Cup000002g002044.1	Cup000140g041500.1
Cup000013g013942.1	0	0	0	0	0	0	0	0				Cup000035g026850.1	Cup000071g036377.A	Cup000022g019940.1
Cup000013g013953.1	0	0	0	0	0	0	0	0				Cup000035g026854.1	Cup000035g026964.1	Cup000033g025987.1
Cup000013g013956.A	0	0	0	0	0	0	0	0				Cup000083g037544.1	Cup000132g041151.A	Cup000074g036732.1
Cup000013g013966.1	0	0	0	0	0	0	0	0				Cup000029g023419.1	Cup000006g006692.1	Cup000022g019747.1
Cup000013g013967.A	0	0	0	0	0	0	0	0				Cup000045g030828.1	Cup000007g007736.1	Cup000024g020685.1
Cup000013g013968.1	0	0	0	0	0	0	0	0				Cup000101g039487.1	Cup000017g016416.1	Cup000033g025615.1
Cup000013g013976.A	0	0	0	0	0	0	0	0				Cup000009g009723.1	Cup000008g008658.1	Cup000042g029676.A
Cup000013g013977.1	0	0	0	0	0	0	0	0				Cup000191g043157.A	Cup000035g026523.A	Cup000015g015190.1
Cup000013g013978.A	0	0	0	0	0	0	0	0				Cup000025g021777.1	Cup000153g042099.1	Cup000051g032584.1
Cup000013g013981.A	0	0	0	0	0	0	0	0				Cup000024g021266.A	Cup000002g001571.1	Cup000004g003980.1
Cup000013g013982.A	0	0	0	0	0	0	0	0				Cup000032g025435.1	Cup000057g034005.1	Cup000091g038430.1
Cup000013g013989.A	0	0	0	0	0	0	0	0				Cup000001g000101.1	Cup000011g011954.1	Cup000058g034186.1
Cup000013g013991.1	0	0	0	0	0	0	0	0				Cup000033g026007.1	Cup000051g032429.1	Cup000024g020775.1
Cup000013g013994.A	0	0	0	0	0	0	0	0				Cup000010g010487.1	Cup000005g005448.1	Cup000040g028658.A
Cup000013g013997.A	0	0	0	0	0	0	0	0				Cup002617g046291.1	Cup000021g019426.A	Cup000094g038877.1
Cup000013g013999.1	0	0	0	0	0	0	0	0				Cup000007g007095.1	Cup000014g014742.1	Cup000022g019802.1
Cup000013g014006.1	0	0	0	0	0	0	0	0				Cup000027g022595.1	Cup000122g040732.1	Cup000044g030195.1
Cup000013g014009.A	0	0	0	0	0	0	0	0				Cup000011g011288.1	Cup000041g029302.A	Cup000019g017921.1
Cup000013g014015.1	0	0	0	0	0	0	0	0				Cup000014g014811.1	Cup000025g021406.1	Cup000022g019690.1
Cup000013g014016.A	0	0	0	0	0	0	0	0				Cup000041g029058.1	Cup000013g013879.1	Cup000066g035606.1
Cup000013g014019.A	0	0	0	0	0	0	0	0				Cup000001g000721.A	Cup000007g007353.1	Cup000033g025547.1
Cup000013g014025.A	0	0	0	0	0	0	0	0				Cup000046g031020.1	Cup000144g041699.1	Cup000008g008292.1
Cup000013g014031.A	0	0	0	0	0	0	0	0				Cup000022g019615.1	Cup000027g022592.1	Cup000071g036314.1
Cup000013g014035.A	0	0	0	0	0	0	0	0				Cup000041g029085.1	Cup000022g019676.1	Cup000003g003126.1
Cup000013g014037.1	0	0	0	0	0	0	0	0				Cup000010g010709.1	Cup000002g002195.1	Cup000017g016354.1
Cup000013g014041.A	0	0	0	0	0	0	0	0				Cup000008g008178.A	Cup000018g017553.1	Cup000013g013075.1
Cup000013g014048.A	0	0	0	0	0	0	0	0				Cup000031g024640.1	Cup000010g011001.1	Cup000032g025109.1
Cup000013g014055.A	0	0	0	0	0	0	0	0				Cup000038g027721.1	Cup000065g035401.1	Cup000013g013172.1
Cup000013g014057.A	0	0	0	0	0	0	0	0				Cup000054g033300.1	Cup000038g028066.1	Cup000035g026618.1
Cup000013g014058.A	0	0	0	0	0	0	0	0				Cup000057g033995.1	Cup000016g016039.1	Cup000015g015266.1
Cup000013g014072.A	0	0	0	0	0	0	0	0				Cup000014g014669.A	Cup000032g025445.1	Cup000097g039195.1
Cup000013g014073.A	0	0	0	0	0	0	0	0				Cup000034g026359.1	Cup000033g026025.1	Cup000030g024285.1
Cup000013g014085.A	0	0	0	0	0	0	0	0				Cup000029g023733.1	Cup000069g036192.1	Cup000020g018835.1
Cup000013g014086.A	0	0	0	0	0	0	0	0				Cup000014g014296.1	Cup000006g006763.1	Cup000001g000237.1
Cup000013g014087.A	0	0	0	0	0	0	0	0				Cup000025g021686.1	Cup000009g009279.1	Cup000022g019989.1
Cup000013g014089.1	0	0	0	0	0	0	0	0				Cup000001g000948.1	Cup000049g032026.A	Cup000019g017835.1
Cup000013g014090.1	0	0	0	0	0	0	0	0				Cup000040g028744.1	Cup000092g038597.1	Cup000152g042032.1
Cup000014g014106.A	0	0	0	0	0	0	0	0				Cup000154g042163.A	Cup000003g002724.1	Cup000013g013567.1
Cup000014g014109.1	0	0	0	0	0	0	0	0				Cup000013g013242.1	Cup000006g006271.1	Cup000023g020476.1
Cup000014g014128.A	0	0	0	0	0	0	0	0				Cup000006g006058.1	Cup000021g019419.1	Cup000011g011762.A
Cup000014g014136.A	0	0	0	0	0	0	0	0				Cup000041g029414.1	Cup000006g006679.1	Cup000084g037692.1
Cup000014g014162.1	0	0	0	0	0	0	0	0				Cup000014g014250.1	Cup000049g032133.1	Cup000006g006161.1
Cup000014g014166.1	0	0	0	0	0	0	0	0				Cup000001g000044.1	Cup000045g030880.1	Cup000017g016300.1
Cup000014g014173.A	0	0	0	0	0	0	0	0				Cup000018g017523.A	Cup000021g019104.A	Cup000009g009138.1
Cup000014g014174.1	0	0	0	0	0	0	0	0				Cup000043g029861.1	Cup000074g036763.1	Cup000273g043978.A
Cup000014g014178.A	0	0	0	0	0	0	0	0				Cup000053g033179.1	Cup000247g043749.1	Cup000009g009090.1
Cup000014g014214.A	0	0	0	0	0	0	0	0				Cup000044g030170.1	Cup000013g013860.1	Cup000010g010877.1
Cup000014g014220.1	0	0	0	0	0	0	0	0				Cup000032g025333.1	Cup000009g009686.A	Cup000027g022762.A
Cup000014g014236.A	0	0	0	0	0	0	0	0				Cup000001g000842.1	Cup000004g003728.1	Cup000051g032572.A
Cup000014g014241.1	0	0	0	0	0	0	0	0				Cup000020g018736.1	Cup000016g015619.1	Cup000130g041064.1
Cup000014g014246.A	0	0	0	0	0	0	0	0				Cup000047g031453.A	Cup000016g015491.1	Cup000097g039189.1
Cup000014g014260.A	0	0	0	0	0	0	0	0				Cup000054g033412.1	Cup000001g000855.A	Cup000057g033941.1
Cup000014g014261.A	0	0	0	0	0	0	0	0				Cup000101g039423.1	Cup000052g032889.1	Cup000091g038331.1
Cup000014g014263.A	0	0	0	0	0	0	0	0				Cup000005g005819.1	Cup000024g020811.1	Cup000130g041093.1
Cup000014g014278.A	0	0	0	0	0	0	0	0				Cup000004g003793.1	Cup000102g039549.1	Cup000015g015259.1
Cup000014g014292.A	0	0	0	0	0	0	0	0				Cup000010g010401.A	Cup000043g030024.A	Cup000006g006770.1
Cup000014g014307.A	0	0	0	0	0	0	0	0				Cup000024g021014.1	Cup000044g030477.1	Cup000028g023252.1
Cup000014g014308.A	0	0	0	0	0	0	0	0				Cup000028g022988.1	Cup000006g006260.1	Cup000060g034397.1
Cup000014g014325.1	0	0	0	0	0	0	0	0				Cup000003g002763.1	Cup000016g015507.1	Cup000024g020783.1
Cup000014g014368.A	0	0	0	0	0	0	0	0				Cup000116g040474.1	Cup000004g003934.1	Cup000012g012334.1
Cup000014g014370.A	0	0	0	0	0	0	0	0				Cup000005g005581.1	Cup000023g020334.1	Cup000028g023244.1
Cup000014g014371.1	0	0	0	0	0	0	0	0				Cup000006g006333.1	Cup000039g028266.1	Cup000195g043217.1
Cup000014g014374.A	0	0	0	0	0	0	0	0				Cup000033g025704.1	Cup000016g015561.A	Cup000058g034202.1
Cup000014g014382.A	0	0	0	0	0	0	0	0				Cup000227g043618.1	Cup000005g005665.1	Cup000003g003567.A
Cup000014g014397.1	0	0	0	0	0	0	0	0				Cup000104g039810.1	Cup000001g001004.1	Cup000029g023875.1
Cup000014g014410.A	0	0	0	0	0	0	0	0				Cup000041g029119.1	Cup000002g002238.1	Cup000042g029729.1
Cup000014g014412.1	0	0	0	0	0	0	0	0				Cup000021g019466.A	Cup000084g037641.1	Cup000098g039307.1
Cup000014g014413.1	0	0	0	0	0	0	0	0				Cup000013g013605.1	Cup000048g031650.1	Cup000127g040936.1
Cup000014g014419.A	0	0	0	0	0	0	0	0				Cup000010g010232.1	Cup000001g000129.1	Cup000214g043522.1
Cup000014g014430.1	0	0	0	0	0	0	0	0				Cup000027g022748.1	Cup000042g029506.1	Cup000016g015857.1
Cup000014g014436.A	0	0	0	0	0	0	0	0				Cup000009g009845.1	Cup000103g039591.A	Cup000009g009783.1
Cup000014g014437.A	0	0	0	0	0	0	0	0				Cup000044g030162.A	Cup000044g030256.1	Cup000008g008767.1
Cup000014g014444.A	0	0	0	0	0	0	0	0				Cup000083g037522.1	Cup000097g039142.A	Cup000014g014776.1
Cup000014g014447.A	0	0	0	0	0	0	0	0				Cup000006g006098.1	Cup000004g003974.1	Cup000022g019737.1
Cup000014g014456.A	0	0	0	0	0	0	0	0				Cup000004g004654.1	Cup000013g013197.1	Cup000015g015046.1
Cup000014g014464.A	0	0	0	0	0	0	0	0				Cup000040g028606.1	Cup000037g027508.1	Cup000003g003095.1
Cup000014g014465.A	0	0	0	0	0	0	0	0				Cup000014g014667.1	Cup000041g029039.1	Cup000053g033035.1
Cup000014g014478.1	0	0	0	0	0	0	0	0				Cup000134g041304.1	Cup000002g002173.1	Cup000013g013103.1
Cup000014g014480.1	0	0	0	0	0	0	0	0				Cup000014g014400.1	Cup000073g036580.1	Cup001367g045713.1
Cup000014g014485.A	0	0	0	0	0	0	0	0				Cup000103g039593.A	Cup000008g008742.1	Cup000077g037072.1
Cup000014g014488.A	0	0	0	0	0	0	0	0				Cup000013g013308.1	Cup000132g041171.1	Cup000022g019706.1
Cup000014g014496.A	0	0	0	0	0	0	0	0				Cup000006g006277.1	Cup000035g026953.1	Cup000066g035598.1
Cup000014g014498.1	0	0	0	0	0	0	0	0				Cup000086g037907.1	Cup000169g042655.1	Cup000002g001693.1
Cup000014g014506.A	0	0	0	0	0	0	0	0				Cup000007g007047.1	Cup000085g037848.1	Cup000011g011440.A
Cup000014g014507.1	0	0	0	0	0	0	0	0				Cup000030g024459.A	Cup000034g026403.1	Cup000057g034027.1
Cup000014g014511.1	0	0	0	0	0	0	0	0				Cup000039g028421.A	Cup000009g009300.A	Cup000012g012842.1
Cup000014g014536.A	0	0	0	0	0	0	0	0				Cup000143g041662.1	Cup000018g017572.1	Cup000032g025126.1
Cup000014g014550.A	0	0	0	0	0	0	0	0				Cup000013g013046.1	Cup000006g006960.A	Cup000122g040741.1
Cup000014g014565.A	0	0	0	0	0	0	0	0				Cup000030g024080.1	Cup000083g037451.1	Cup000022g020055.1
Cup000014g014571.1	0	0	0	0	0	0	0	0				Cup000096g039068.1	Cup000034g026385.1	Cup000030g024343.1
Cup000014g014574.1	0	0	0	0	0	0	0	0				Cup000017g016789.1	Cup002708g046326.1	Cup000042g029753.1
Cup000014g014582.A	0	0	0	0	0	0	0	0				Cup000161g042338.1	Cup000083g037446.1	Cup000054g033281.1
Cup000014g014585.1	0	0	0	0	0	0	0	0				Cup000062g034804.1	Cup000013g013896.1	Cup000019g018178.1
Cup000014g014609.1	0	0	0	0	0	0	0	0				Cup000030g024062.1	Cup000010g010726.1	Cup000766g045174.A
Cup000014g014613.A	0	0	0	0	0	0	0	0				Cup000036g027139.1	Cup000040g028825.A	Cup000010g010959.1
Cup000014g014616.1	0	0	0	0	0	0	0	0				Cup000057g033983.1	Cup000004g004260.1	Cup000021g019480.1
Cup000014g014619.1	0	0	0	0	0	0	0	0				Cup000020g018897.1	Cup000042g029660.1	Cup000001g000785.1
Cup000014g014639.A	0	0	0	0	0	0	0	0				Cup000041g029017.1	Cup000020g018448.1	Cup000025g021436.1
Cup000014g014651.A	0	0	0	0	0	0	0	0				Cup000005g005035.1	Cup000029g023375.1	Cup000011g011462.1
Cup000014g014679.A	0	0	0	0	0	0	0	0				Cup000007g007677.1	Cup000007g007671.1	Cup000030g023916.1
Cup000014g014700.1	0	0	0	0	0	0	0	0				Cup000047g031591.A	Cup000008g008301.1	Cup000003g003045.A
Cup000014g014753.1	0	0	0	0	0	0	0	0				Cup000003g002798.1	Cup000024g020798.1	Cup000062g034963.1
Cup000014g014773.A	0	0	0	0	0	0	0	0				Cup000124g040837.1	Cup000021g019490.1	Cup002592g046280.1
Cup000014g014784.A	0	0	0	0	0	0	0	0				Cup000022g019993.1	Cup000001g000846.1	Cup000172g042742.1
Cup000014g014793.1	0	0	0	0	0	0	0	0				Cup000013g013093.1	Cup000024g021051.1	Cup000014g014530.1
Cup000014g014822.1	0	0	0	0	0	0	0	0				Cup000135g041336.1	Cup000297g044083.A	Cup000032g025204.A
Cup000014g014825.A	0	0	0	0	0	0	0	0				Cup000015g015007.1	Cup000035g026605.1	Cup000001g000911.1
Cup000014g014832.1	0	0	0	0	0	0	0	0				Cup000169g042621.1	Cup000062g034951.1	Cup000050g032245.1
Cup000014g014841.A	0	0	0	0	0	0	0	0				Cup000036g027194.1	Cup000037g027513.1	Cup000058g034161.1
Cup000014g014844.A	0	0	0	0	0	0	0	0				Cup000002g002098.1	Cup000005g005027.A	Cup000087g038104.1
Cup000014g014857.1	0	0	0	0	0	0	0	0				Cup000022g019797.1	Cup000023g020562.1	Cup000066g035633.1
Cup000014g014863.A	0	0	0	0	0	0	0	0				Cup000083g037448.1	Cup000106g039953.1	Cup000012g012251.1
Cup000014g014878.1	0	0	0	0	0	0	0	0				Cup000208g043440.1	Cup000034g026210.1	Cup000008g008201.1
Cup000014g014881.1	0	0	0	0	0	0	0	0				Cup000026g021896.1	Cup000033g025923.1	Cup000009g009116.1
Cup000014g014885.1	0	0	0	0	0	0	0	0				Cup000085g037836.1	Cup000032g025138.A	Cup000001g000669.A
Cup000014g014896.1	0	0	0	0	0	0	0	0				Cup000006g006803.1	Cup000057g034024.1	Cup000015g015194.1
Cup000014g014902.A	0	0	0	0	0	0	0	0				Cup000019g018288.A	Cup000083g037508.1	Cup000014g014476.1
Cup000014g014905.A	0	0	0	0	0	0	0	0				Cup000003g002774.1	Cup000009g009864.1	Cup000172g042745.A
Cup000014g014906.A	0	0	0	0	0	0	0	0				Cup000029g023479.1	Cup000024g020835.A	Cup000057g034039.1
Cup000014g014910.1	0	0	0	0	0	0	0	0				Cup000048g031618.1	Cup000158g042227.A	Cup000032g025111.1
Cup000014g014922.A	0	0	0	0	0	0	0	0				Cup000132g041172.1	Cup000030g024402.1	Cup000014g014622.1
Cup000014g014924.A	0	0	0	0	0	0	0	0				Cup000044g030420.1	Cup000019g018000.A	Cup000078g037141.1
Cup000014g014934.1	0	0	0	0	0	0	0	0				Cup000043g029880.1	Cup000056g033746.1	Cup000038g027706.1
Cup000015g014949.1	0	0	0	0	0	0	0	0				Cup000028g023156.A	Cup000083g037427.1	Cup000006g006630.1
Cup000015g014951.A	0	0	0	0	0	0	0	0				Cup000010g010766.1	Cup000025g021602.A	Cup000030g024026.1
Cup000015g014956.1	0	0	0	0	0	0	0	0				Cup000052g032906.1	Cup000035g026994.1	Cup000099g039355.1
Cup000015g014959.1	0	0	0	0	0	0	0	0				Cup000004g004618.1	Cup000023g020372.1	Cup000013g013565.1
Cup000015g014988.A	0	0	0	0	0	0	0	0				Cup000002g002127.1	Cup000016g015472.1	Cup000019g018084.1
Cup000015g014999.A	0	0	0	0	0	0	0	0				Cup000064g035135.1	Cup000054g033380.1	Cup000076g036872.A
Cup000015g015002.A	0	0	0	0	0	0	0	0				Cup000091g038346.1	Cup000004g003766.1	Cup000086g037931.1
Cup000015g015018.1	0	0	0	0	0	0	0	0				Cup000097g039111.1	Cup000001g001001.A	Cup000024g021217.A
Cup000015g015027.A	0	0	0	0	0	0	0	0				Cup000007g007038.1	Cup000046g031265.1	Cup000014g014743.1
Cup000015g015039.1	0	0	0	0	0	0	0	0				Cup000076g036885.A	Cup000017g016360.1	Cup000006g006355.1
Cup000015g015084.A	0	0	0	0	0	0	0	0				Cup000011g011618.1	Cup001936g046025.1	Cup000061g034668.1
Cup000015g015085.A	0	0	0	0	0	0	0	0				Cup000042g029649.1	Cup000035g026962.A	Cup000022g020071.1
Cup000015g015097.A	0	0	0	0	0	0	0	0				Cup000074g036664.1	Cup000004g003664.1	Cup000050g032203.1
Cup000015g015107.1	0	0	0	0	0	0	0	0				Cup000065g035471.1	Cup000001g000065.1	Cup000124g040830.1
Cup000015g015109.A	0	0	0	0	0	0	0	0				Cup000001g001060.A	Cup000013g013667.1	Cup000083g037441.1
Cup000015g015113.A	0	0	0	0	0	0	0	0				Cup001139g045578.1	Cup000029g023675.A	Cup000068g036025.1
Cup000015g015127.1	0	0	0	0	0	0	0	0				Cup000063g035092.1	Cup000005g005797.1	Cup000100g039360.1
Cup000015g015128.1	0	0	0	0	0	0	0	0				Cup000051g032644.1	Cup000040g028558.1	Cup000018g017461.1
Cup000015g015132.1	0	0	0	0	0	0	0	0				Cup000638g044978.1	Cup000004g004359.A	Cup000023g020324.1
Cup000015g015139.A	0	0	0	0	0	0	0	0				Cup000029g023680.A	Cup000027g022509.1	Cup000018g017176.1
Cup000015g015143.A	0	0	0	0	0	0	0	0				Cup000498g044755.1	Cup000009g009219.1	Cup000122g040785.A
Cup000015g015146.A	0	0	0	0	0	0	0	0				Cup000005g005089.1	Cup000014g014230.1	Cup000002g001585.1
Cup000015g015150.A	0	0	0	0	0	0	0	0				Cup000022g020011.1	Cup000025g021712.1	Cup000052g032778.1
Cup000015g015158.1	0	0	0	0	0	0	0	0				Cup000004g004426.1	Cup000055g033573.1	Cup000014g014108.1
Cup000015g015160.A	0	0	0	0	0	0	0	0				Cup000083g037449.1	Cup000016g015611.1	Cup000011g011841.1
Cup000015g015161.A	0	0	0	0	0	0	0	0				Cup000033g025789.1	Cup000038g027691.1	Cup000024g020712.1
Cup000015g015164.1	0	0	0	0	0	0	0	0				Cup000022g020075.1	Cup000007g007824.1	Cup000003g003192.1
Cup000015g015168.A	0	0	0	0	0	0	0	0				Cup000022g019635.A	Cup000068g036004.A	Cup000016g015906.1
Cup000015g015170.A	0	0	0	0	0	0	0	0				Cup000132g041155.1	Cup001165g045585.1	Cup000039g028410.1
Cup000015g015172.1	0	0	0	0	0	0	0	0				Cup000037g027514.1	Cup000002g001638.1	Cup000331g044229.1
Cup000015g015183.1	0	0	0	0	0	0	0	0				Cup000012g012652.1	Cup000143g041654.1	Cup000042g029489.1
Cup000015g015188.1	0	0	0	0	0	0	0	0				Cup000054g033363.1	Cup000004g004320.1	Cup000043g029870.1
Cup000015g015214.1	0	0	0	0	0	0	0	0				Cup000018g017189.1	Cup000003g002705.1	Cup000046g031266.1
Cup000015g015215.1	0	0	0	0	0	0	0	0				Cup000045g030653.1	Cup000097g039203.1	Cup000030g024456.A
Cup000015g015218.1	0	0	0	0	0	0	0	0				Cup000009g009102.1	Cup000019g018214.1	Cup000038g027707.1
Cup000015g015242.1	0	0	0	0	0	0	0	0				Cup000026g022062.1	Cup000091g038445.1	Cup000044g030385.1
Cup000015g015244.1	0	0	0	0	0	0	0	0				Cup000065g035308.1	Cup000007g007683.1	Cup000029g023669.1
Cup000015g015270.A	0	0	0	0	0	0	0	0				Cup000045g030614.1	Cup000030g024003.1	Cup000009g009345.1
Cup000015g015285.1	0	0	0	0	0	0	0	0				Cup000026g021944.1	Cup000029g023424.1	Cup000009g009871.1
Cup000015g015299.1	0	0	0	0	0	0	0	0				Cup000029g023411.A	Cup000046g031045.1	Cup000045g030860.1
Cup000015g015302.1	0	0	0	0	0	0	0	0				Cup000008g008344.A	Cup000103g039662.1	Cup000172g042744.1
Cup000015g015308.A	0	0	0	0	0	0	0	0				Cup000085g037826.1	Cup000032g025468.A	Cup000027g022761.1
Cup000015g015311.A	0	0	0	0	0	0	0	0				Cup000003g003401.1	Cup000018g017249.1	Cup000035g026713.A
Cup000015g015313.1	0	0	0	0	0	0	0	0				Cup000004g004490.1	Cup000010g010805.1	Cup000138g041415.1
Cup000015g015319.1	0	0	0	0	0	0	0	0				Cup000061g034772.1	Cup000010g010346.1	Cup000103g039621.1
Cup000015g015323.A	0	0	0	0	0	0	0	0				Cup000015g015017.1	Cup000028g023026.1	Cup000057g034020.1
Cup000015g015327.A	0	0	0	0	0	0	0	0				Cup000012g012345.1	Cup000005g005031.1	Cup000009g009123.1
Cup000015g015328.1	0	0	0	0	0	0	0	0				Cup000055g033492.1	Cup000054g033255.A	Cup000070g036274.A
Cup000015g015334.A	0	0	0	0	0	0	0	0				Cup000017g016794.1	Cup000013g013128.1	Cup000037g027475.1
Cup000015g015339.1	0	0	0	0	0	0	0	0				Cup000032g025336.1	Cup000036g027181.1	Cup000035g026709.1
Cup000015g015349.1	0	0	0	0	0	0	0	0				Cup000042g029756.1	Cup000002g002052.1	Cup000001g000397.1
Cup000015g015359.A	0	0	0	0	0	0	0	0				Cup000012g012277.1	Cup000011g011912.1	Cup000161g042318.1
Cup000015g015360.1	0	0	0	0	0	0	0	0				Cup000032g025483.A	Cup000023g020451.1	Cup000031g024954.1
Cup000015g015365.1	0	0	0	0	0	0	0	0				Cup000005g005258.1	Cup000055g033509.1	Cup000045g030697.1
Cup000015g015373.A	0	0	0	0	0	0	0	0				Cup000092g038506.1	Cup000004g003827.1	Cup000067g035922.A
Cup000015g015374.A	0	0	0	0	0	0	0	0				Cup000162g042398.1	Cup000034g026330.1	Cup000035g026824.1
Cup000015g015378.A	0	0	0	0	0	0	0	0				Cup000019g018240.1	Cup000162g042389.1	Cup000048g031788.1
Cup000015g015382.1	0	0	0	0	0	0	0	0				Cup002286g046156.1	Cup000168g042520.1	Cup000011g011859.1
Cup000015g015383.1	0	0	0	0	0	0	0	0				Cup000001g000432.1	Cup000271g043964.1	Cup000784g045204.1
Cup000015g015386.A	0	0	0	0	0	0	0	0				Cup000004g004574.1	Cup000023g020338.1	Cup000031g024593.1
Cup000016g015394.1	0	0	0	0	0	0	0	0				Cup000112g040306.A	Cup000025g021664.1	Cup000013g013729.1
Cup000016g015395.1	0	0	0	0	0	0	0	0				Cup000015g015269.1	Cup000026g022312.1	Cup000044g030215.1
Cup000016g015400.A	0	0	0	0	0	0	0	0				Cup000009g009719.1	Cup000013g013712.1	Cup000009g009188.1
Cup000016g015405.1	0	0	0	0	0	0	0	0				Cup000030g024444.1	Cup000032g025134.1	Cup000007g007707.1
Cup000016g015412.A	0	0	0	0	0	0	0	0				Cup000002g002083.1	Cup000013g013794.1	Cup000104g039819.A
Cup000016g015427.A	0	0	0	0	0	0	0	0				Cup000021g019370.1	Cup000006g006824.1	Cup000064g035272.1
Cup000016g015430.A	0	0	0	0	0	0	0	0				Cup000705g045089.1	Cup000080g037249.1	Cup000043g029976.A
Cup000016g015455.A	0	0	0	0	0	0	0	0				Cup000033g025747.1	Cup000003g002889.1	Cup000013g013196.1
Cup000016g015465.A	0	0	0	0	0	0	0	0				Cup000011g011314.1	Cup000013g013133.1	Cup000001g001160.1
Cup000016g015473.A	0	0	0	0	0	0	0	0				Cup000172g042735.1	Cup000011g011207.1	Cup000023g020351.1
Cup000016g015487.1	0	0	0	0	0	0	0	0				Cup000003g003238.1	Cup000009g009835.1	Cup000025g021303.1
Cup000016g015488.1	0	0	0	0	0	0	0	0				Cup000018g017218.1	Cup000048g031792.1	Cup000083g037586.A
Cup000016g015514.1	0	0	0	0	0	0	0	0				Cup000022g019957.1	Cup000003g002920.1	Cup000033g025644.1
Cup000016g015534.A	0	0	0	0	0	0	0	0				Cup000017g016677.1	Cup000271g043950.1	Cup000024g020737.1
Cup000016g015566.1	0	0	0	0	0	0	0	0				Cup000135g041343.1	Cup000009g009649.1	Cup000044g030582.1
Cup000016g015578.A	0	0	0	0	0	0	0	0				Cup000022g020065.1	Cup000008g008345.1	Cup000018g017665.A
Cup000016g015615.1	0	0	0	0	0	0	0	0				Cup000024g020824.1	Cup000097g039124.1	Cup000812g045246.1
Cup000016g015626.1	0	0	0	0	0	0	0	0				Cup000104g039714.1	Cup000098g039264.1	Cup000025g021286.A
Cup000016g015638.A	0	0	0	0	0	0	0	0				Cup000012g012821.1	Cup000011g011833.1	Cup000004g003906.1
Cup000016g015641.1	0	0	0	0	0	0	0	0				Cup000012g012629.1	Cup000016g015565.1	Cup000030g024055.1
Cup000016g015645.1	0	0	0	0	0	0	0	0				Cup000021g019352.1	Cup000003g003224.1	Cup000008g008736.1
Cup000016g015654.A	0	0	0	0	0	0	0	0				Cup000006g006604.1	Cup001698g045890.1	Cup000093g038781.1
Cup000016g015655.A	0	0	0	0	0	0	0	0				Cup000030g024077.A	Cup000003g002823.1	Cup000038g027756.1
Cup000016g015658.1	0	0	0	0	0	0	0	0				Cup000083g037433.1	Cup000005g004991.1	Cup000011g011398.1
Cup000016g015667.A	0	0	0	0	0	0	0	0				Cup000052g032734.1	Cup000010g010718.1	Cup000020g018475.1
Cup000016g015668.1	0	0	0	0	0	0	0	0				Cup000033g025702.1	Cup000009g009965.1	Cup000091g038350.1
Cup000016g015680.A	0	0	0	0	0	0	0	0				Cup000042g029580.1	Cup000007g007763.1	Cup000017g016675.1
Cup000016g015681.A	0	0	0	0	0	0	0	0				Cup000069g036081.1	Cup000030g024278.1	Cup000002g002062.1
Cup000016g015685.1	0	0	0	0	0	0	0	0				Cup000113g040350.1	Cup000002g001486.A	Cup000107g040024.1
Cup000016g015701.A	0	0	0	0	0	0	0	0				Cup000009g009528.A	Cup000004g004340.A	Cup000081g037332.1
Cup000016g015707.1	0	0	0	0	0	0	0	0				Cup000065g035460.1	Cup000104g039741.A	Cup000009g010071.A
Cup000016g015711.A	0	0	0	0	0	0	0	0				Cup000001g000750.1	Cup000044g030198.1	Cup000008g008568.1
Cup000016g015713.A	0	0	0	0	0	0	0	0				Cup000004g004485.1	Cup000035g026975.1	Cup000055g033469.1
Cup000016g015714.A	0	0	0	0	0	0	0	0				Cup000064g035133.1	Cup000196g043269.1	Cup000032g025110.1
Cup000016g015715.1	0	0	0	0	0	0	0	0				Cup000022g020085.1	Cup000006g006084.1	Cup000018g017193.1
Cup000016g015716.A	0	0	0	0	0	0	0	0				Cup000043g029924.1	Cup000007g007138.1	Cup000065g035442.1
Cup000016g015721.1	0	0	0	0	0	0	0	0				Cup000011g011699.A	Cup000007g007055.1	Cup000004g003998.1
Cup000016g015723.1	0	0	0	0	0	0	0	0				Cup000014g014341.1	Cup000055g033504.1	Cup000196g043270.1
Cup000016g015738.1	0	0	0	0	0	0	0	0				Cup000017g016476.1	Cup000010g010361.1	Cup000008g008686.1
Cup000016g015747.1	0	0	0	0	0	0	0	0				Cup000081g037349.A	Cup000077g036985.1	Cup000116g040467.1
Cup000016g015750.1	0	0	0	0	0	0	0	0				Cup000030g024030.1	Cup000037g027506.1	Cup000020g018543.1
Cup000016g015751.1	0	0	0	0	0	0	0	0				Cup000022g019716.1	Cup000009g009861.1	Cup000002g002002.1
Cup000016g015767.1	0	0	0	0	0	0	0	0				Cup000029g023773.1	Cup000010g011019.A	Cup000057g033984.A
Cup000016g015769.1	0	0	0	0	0	0	0	0				Cup000080g037253.1	Cup000040g028797.1	Cup000033g025616.1
Cup000016g015771.1	0	0	0	0	0	0	0	0				Cup000042g029738.1	Cup000004g004409.1	Cup000003g003175.1
Cup000016g015774.1	0	0	0	0	0	0	0	0				Cup000009g009021.1	Cup000160g042293.1	Cup000021g019221.1
Cup000016g015788.A	0	0	0	0	0	0	0	0				Cup000028g022877.1	Cup000014g014218.1	Cup000011g011749.1
Cup000016g015789.1	0	0	0	0	0	0	0	0				Cup000064g035251.1	Cup000092g038540.1	Cup000025g021804.1
Cup000016g015791.1	0	0	0	0	0	0	0	0				Cup000020g018429.1	Cup000007g007859.1	Cup000170g042684.A
Cup000016g015794.A	0	0	0	0	0	0	0	0				Cup000001g001174.1	Cup000026g022212.1	Cup000074g036754.1
Cup000016g015810.1	0	0	0	0	0	0	0	0				Cup000015g015338.1	Cup000035g026546.1	Cup000003g002694.1
Cup000016g015814.1	0	0	0	0	0	0	0	0				Cup000008g008264.1	Cup000040g028857.1	Cup000124g040828.1
Cup000016g015826.1	0	0	0	0	0	0	0	0				Cup000056g033862.1	Cup000072g036480.1	Cup000084g037623.1
Cup000016g015830.1	0	0	0	0	0	0	0	0				Cup000031g024740.1	Cup000006g006051.1	Cup000026g022045.1
Cup000016g015873.A	0	0	0	0	0	0	0	0				Cup000043g030085.1	Cup000056g033682.1	Cup000003g002946.1
Cup000016g015898.A	0	0	0	0	0	0	0	0				Cup000018g017608.1	Cup000013g013832.1	Cup000019g017791.1
Cup000016g015907.A	0	0	0	0	0	0	0	0				Cup000011g011783.1	Cup000016g015433.1	Cup000154g042117.1
Cup000016g015911.A	0	0	0	0	0	0	0	0				Cup000097g039177.1	Cup000004g004637.1	Cup000048g031651.1
Cup000016g015933.A	0	0	0	0	0	0	0	0				Cup000013g013116.1	Cup010122g047077.A	Cup000013g013624.1
Cup000016g015950.1	0	0	0	0	0	0	0	0				Cup000093g038717.1	Cup000091g038373.A	Cup000001g000224.1
Cup000016g016003.1	0	0	0	0	0	0	0	0				Cup000027g022788.1	Cup000005g005647.A	Cup000014g014634.1
Cup000016g016045.A	0	0	0	0	0	0	0	0				Cup000026g021921.1	Cup000031g024571.1	Cup000016g015582.1
Cup000016g016047.A	0	0	0	0	0	0	0	0				Cup000056g033697.1	Cup000005g005149.1	Cup000058g034168.1
Cup000016g016060.A	0	0	0	0	0	0	0	0				Cup000004g003646.1	Cup000026g022348.1	Cup000092g038513.1
Cup000016g016062.A	0	0	0	0	0	0	0	0				Cup000008g008080.1	Cup000002g002445.A	Cup000013g013732.1
Cup000016g016079.A	0	0	0	0	0	0	0	0				Cup000087g038090.1	Cup000006g006153.A	Cup000014g014191.1
Cup000016g016082.1	0	0	0	0	0	0	0	0				Cup000055g033456.A	Cup000026g022064.1	Cup000055g033584.A
Cup000016g016084.1	0	0	0	0	0	0	0	0				Cup000037g027487.1	Cup000040g028741.1	Cup000009g009131.1
Cup000016g016085.A	0	0	0	0	0	0	0	0				Cup000047g031607.1	Cup000074g036674.1	Cup000019g017945.1
Cup000016g016088.A	0	0	0	0	0	0	0	0				Cup000014g014323.1	Cup000001g000292.1	Cup000083g037509.1
Cup000016g016091.A	0	0	0	0	0	0	0	0				Cup000175g042815.1	Cup000071g036365.1	Cup000030g023969.1
Cup000016g016100.A	0	0	0	0	0	0	0	0				Cup000003g002864.A	Cup000030g024275.1	Cup000153g042059.1
Cup000016g016101.1	0	0	0	0	0	0	0	0				Cup000006g006312.1	Cup000030g024119.1	Cup000002g001492.1
Cup000016g016106.A	0	0	0	0	0	0	0	0				Cup000002g002024.1	Cup000019g018195.1	Cup000009g009565.1
Cup000016g016109.A	0	0	0	0	0	0	0	0				Cup000006g006106.1	Cup000012g012299.1	Cup000103g039675.A
Cup000016g016110.A	0	0	0	0	0	0	0	0				Cup000039g028395.1	Cup000013g013193.1	Cup000018g017186.1
Cup000016g016111.A	0	0	0	0	0	0	0	0				Cup000016g015840.1	Cup000026g022224.1	Cup000008g008155.A
Cup000016g016113.1	0	0	0	0	0	0	0	0				Cup000144g041759.1	Cup000069g036060.1	Cup000065g035464.1
Cup000016g016119.A	0	0	0	0	0	0	0	0				Cup000017g016238.1	Cup000035g026601.1	Cup000091g038362.1
Cup000016g016131.1	0	0	0	0	0	0	0	0				Cup000017g016393.1	Cup000251g043798.1	Cup000021g019144.1
Cup000016g016134.A	0	0	0	0	0	0	0	0				Cup000041g028971.1	Cup000032g025343.A	Cup000029g023814.1
Cup000016g016142.A	0	0	0	0	0	0	0	0				Cup000016g015480.1	Cup008747g047006.A	Cup000065g035341.1
Cup000016g016146.A	0	0	0	0	0	0	0	0				Cup000031g024835.1	Cup000065g035473.1	Cup000022g020062.1
Cup000016g016160.1	0	0	0	0	0	0	0	0				Cup000025g021371.A	Cup000039g028397.1	Cup000002g002412.1
Cup000016g016162.1	0	0	0	0	0	0	0	0				Cup000009g009848.1	Cup001566g045800.1	Cup000050g032278.A
Cup000016g016165.A	0	0	0	0	0	0	0	0				Cup000052g032843.1	Cup000032g025437.1	Cup000031g024956.1
Cup000016g016167.A	0	0	0	0	0	0	0	0				Cup000005g005483.1	Cup000028g023129.A	Cup000040g028830.A
Cup000016g016172.1	0	0	0	0	0	0	0	0				Cup000003g003320.1	Cup000001g000285.1	Cup000051g032550.1
Cup000016g016176.1	0	0	0	0	0	0	0	0				Cup000035g026586.1	Cup000026g022198.A	Cup000001g000350.1
Cup000016g016178.1	0	0	0	0	0	0	0	0				Cup000018g017187.1	Cup000125g040886.1	Cup000027g022510.1
Cup000016g016179.1	0	0	0	0	0	0	0	0				Cup000016g015637.1	Cup000004g004387.1	Cup000066g035572.1
Cup000016g016187.A	0	0	0	0	0	0	0	0				Cup000111g040263.1	Cup000012g012712.1	Cup000007g007418.A
Cup000016g016191.1	0	0	0	0	0	0	0	0				Cup000055g033466.1	Cup000110g040239.1	Cup000006g006269.1
Cup000016g016192.1	0	0	0	0	0	0	0	0				Cup000019g018124.1	Cup000060g034475.A	Cup000010g010482.1
Cup000016g016217.1	0	0	0	0	0	0	0	0				Cup000014g014171.1	Cup000017g016434.1	Cup000010g010267.1
Cup000017g016223.1	0	0	0	0	0	0	0	0				Cup000022g019966.1	Cup000031g024685.1	Cup000025g021311.1
Cup000017g016239.A	0	0	0	0	0	0	0	0				Cup000104g039749.A	Cup000140g041501.1	Cup000003g002707.1
Cup000017g016242.1	0	0	0	0	0	0	0	0				Cup000051g032611.1	Cup000004g003971.1	Cup000035g026850.1
Cup000017g016269.1	0	0	0	0	0	0	0	0				Cup000011g011664.A	Cup000153g042100.1	Cup000035g026854.1
Cup000017g016271.A	0	0	0	0	0	0	0	0				Cup000005g005162.1	Cup000006g006115.1	Cup000083g037544.1
Cup000017g016277.A	0	0	0	0	0	0	0	0				Cup000007g007061.1	Cup000023g020482.1	Cup000029g023419.1
Cup000017g016296.1	0	0	0	0	0	0	0	0				Cup000001g000406.A	Cup000026g022038.1	Cup000018g017062.1
Cup000017g016299.A	0	0	0	0	0	0	0	0				Cup000005g005767.1	Cup000015g014939.1	Cup000045g030828.1
Cup000017g016306.A	0	0	0	0	0	0	0	0				Cup000009g009189.1	Cup000003g003414.1	Cup000101g039487.1
Cup000017g016307.A	0	0	0	0	0	0	0	0				Cup000124g040835.A	Cup000007g007557.1	Cup000009g009723.1
Cup000017g016347.1	0	0	0	0	0	0	0	0				Cup000004g003802.1	Cup000496g044750.1	Cup000191g043157.A
Cup000017g016366.A	0	0	0	0	0	0	0	0				Cup000002g001636.1	Cup000006g006095.1	Cup000097g039139.A
Cup000017g016368.1	0	0	0	0	0	0	0	0				Cup000012g012401.1	Cup000010g010767.1	Cup000025g021777.1
Cup000017g016370.A	0	0	0	0	0	0	0	0				Cup000034g026263.1	Cup000010g010442.1	Cup000024g021266.A
Cup000017g016374.1	0	0	0	0	0	0	0	0				Cup000016g016152.A	Cup000030g023989.1	Cup000032g025435.1
Cup000017g016383.A	0	0	0	0	0	0	0	0				Cup000033g025645.1	Cup000018g017278.1	Cup000001g000101.1
Cup000017g016396.A	0	0	0	0	0	0	0	0				Cup000006g006561.1	Cup000011g011803.1	Cup000033g026007.1
Cup000017g016397.1	0	0	0	0	0	0	0	0				Cup000008g008809.1	Cup000011g011359.1	Cup000010g010487.1
Cup000017g016399.1	0	0	0	0	0	0	0	0				Cup000042g029496.1	Cup000044g030159.A	Cup002617g046291.1
Cup000017g016405.A	0	0	0	0	0	0	0	0				Cup017417g047252.1	Cup000032g025106.1	Cup000007g007095.1
Cup000017g016420.1	0	0	0	0	0	0	0	0				Cup000008g008729.1	Cup000004g004129.A	Cup000027g022595.1
Cup000017g016440.A	0	0	0	0	0	0	0	0				Cup000091g038360.A	Cup000052g032754.1	Cup000011g011288.1
Cup000017g016442.A	0	0	0	0	0	0	0	0				Cup000011g011848.1	Cup000019g017837.1	Cup000014g014811.1
Cup000017g016473.1	0	0	0	0	0	0	0	0				Cup000072g036463.1	Cup000004g003748.1	Cup000041g029058.1
Cup000017g016479.1	0	0	0	0	0	0	0	0				Cup000025g021616.1	Cup000008g008610.1	Cup000001g000721.A
Cup000017g016483.A	0	0	0	0	0	0	0	0				Cup000020g018550.1	Cup000010g010485.1	Cup000046g031020.1
Cup000017g016485.A	0	0	0	0	0	0	0	0				Cup003387g046491.1	Cup000027g022708.1	Cup000022g019615.1
Cup000017g016501.A	0	0	0	0	0	0	0	0				Cup000018g017511.1	Cup000015g015263.1	Cup000041g029085.1
Cup000017g016510.A	0	0	0	0	0	0	0	0				Cup000030g023961.1	Cup000104g039717.1	Cup000010g010709.1
Cup000017g016512.A	0	0	0	0	0	0	0	0				Cup000118g040572.1	Cup000050g032288.A	Cup000008g008178.A
Cup000017g016514.A	0	0	0	0	0	0	0	0				Cup000051g032627.1	Cup000034g026425.1	Cup000002g001583.1
Cup000017g016519.A	0	0	0	0	0	0	0	0				Cup000002g001580.1	Cup000024g021236.A	Cup000031g024640.1
Cup000017g016527.1	0	0	0	0	0	0	0	0				Cup000001g000828.1	Cup000024g021003.A	Cup000038g027721.1
Cup000017g016541.A	0	0	0	0	0	0	0	0				Cup000025g021613.1	Cup000025g021411.1	Cup000054g033300.1
Cup000017g016543.1	0	0	0	0	0	0	0	0				Cup000029g023630.A	Cup000154g042129.1	Cup000057g033995.1
Cup000017g016547.A	0	0	0	0	0	0	0	0				Cup000143g041622.1	Cup000007g007615.1	Cup000014g014669.A
Cup000017g016552.A	0	0	0	0	0	0	0	0				Cup000103g039586.1	Cup000066g035565.1	Cup000034g026359.1
Cup000017g016556.1	0	0	0	0	0	0	0	0				Cup000011g011380.1	Cup000027g022630.1	Cup000029g023733.1
Cup000017g016558.1	0	0	0	0	0	0	0	0				Cup000003g002604.A	Cup000014g014618.1	Cup000014g014296.1
Cup000017g016559.1	0	0	0	0	0	0	0	0				Cup000043g030018.1	Cup000012g012830.1	Cup000025g021686.1
Cup000017g016571.A	0	0	0	0	0	0	0	0				Cup000030g023950.1	Cup000028g023216.1	Cup000001g000948.1
Cup000017g016581.A	0	0	0	0	0	0	0	0				Cup000042g029498.1	Cup000033g025941.1	Cup000040g028744.1
Cup000017g016592.A	0	0	0	0	0	0	0	0				Cup000054g033262.1	Cup000052g032747.1	Cup000154g042163.A
Cup000017g016595.A	0	0	0	0	0	0	0	0				Cup000025g021643.1	Cup000093g038716.1	Cup000013g013242.1
Cup000017g016597.A	0	0	0	0	0	0	0	0				Cup000824g045260.1	Cup000037g027264.1	Cup000006g006058.1
Cup000017g016602.1	0	0	0	0	0	0	0	0				Cup000043g030020.1	Cup000008g008354.1	Cup000041g029414.1
Cup000017g016609.1	0	0	0	0	0	0	0	0				Cup000007g007301.1	Cup000025g021685.1	Cup000014g014250.1
Cup000017g016616.A	0	0	0	0	0	0	0	0				Cup000044g030512.1	Cup000008g008058.A	Cup000001g000044.1
Cup000017g016619.1	0	0	0	0	0	0	0	0				Cup000083g037566.1	Cup000016g016174.1	Cup000018g017523.A
Cup000017g016620.1	0	0	0	0	0	0	0	0				Cup000045g030721.1	Cup000020g018572.1	Cup000043g029861.1
Cup000017g016629.1	0	0	0	0	0	0	0	0				Cup000039g028442.1	Cup000066g035690.A	Cup000053g033179.1
Cup000017g016631.1	0	0	0	0	0	0	0	0				Cup000031g024872.1	Cup000027g022756.1	Cup000044g030170.1
Cup000017g016632.A	0	0	0	0	0	0	0	0				Cup000007g007775.1	Cup000013g013695.1	Cup000016g015505.1
Cup000017g016636.A	0	0	0	0	0	0	0	0				Cup000015g015034.1	Cup000092g038505.A	Cup000032g025333.1
Cup000017g016670.1	0	0	0	0	0	0	0	0				Cup000011g011899.1	Cup000030g024123.1	Cup000001g000842.1
Cup000017g016673.A	0	0	0	0	0	0	0	0				Cup000001g001000.A	Cup000022g019692.1	Cup000020g018736.1
Cup000017g016676.A	0	0	0	0	0	0	0	0				Cup000023g020306.1	Cup000037g027536.1	Cup000047g031453.A
Cup000017g016686.1	0	0	0	0	0	0	0	0				Cup000026g022229.1	Cup000144g041756.A	Cup000054g033412.1
Cup000017g016690.A	0	0	0	0	0	0	0	0				Cup000092g038672.1	Cup000004g004836.A	Cup000101g039423.1
Cup000017g016718.1	0	0	0	0	0	0	0	0				Cup000018g017101.1	Cup000086g037986.A	Cup000005g005819.1
Cup000017g016754.1	0	0	0	0	0	0	0	0				Cup000107g040023.1	Cup000008g008606.1	Cup000047g031444.A
Cup000017g016785.1	0	0	0	0	0	0	0	0				Cup000051g032552.1	Cup000019g017787.1	Cup000004g003793.1
Cup000017g016842.1	0	0	0	0	0	0	0	0				Cup000104g039825.1	Cup000032g025345.1	Cup000010g010401.A
Cup000017g016861.A	0	0	0	0	0	0	0	0				Cup000011g011865.1	Cup000017g016736.1	Cup000024g021014.1
Cup000017g016887.1	0	0	0	0	0	0	0	0				Cup000006g006301.1	Cup000028g022961.1	Cup000028g022988.1
Cup000017g016897.1	0	0	0	0	0	0	0	0				Cup000009g009603.1	Cup000004g003899.1	Cup000003g002763.1
Cup000017g016898.A	0	0	0	0	0	0	0	0				Cup000003g003220.1	Cup000049g032014.1	Cup000116g040474.1
Cup000017g016906.A	0	0	0	0	0	0	0	0				Cup000026g022079.1	Cup000038g028063.1	Cup000005g005581.1
Cup000017g016921.A	0	0	0	0	0	0	0	0				Cup000026g022271.1	Cup000054g033416.1	Cup000006g006333.1
Cup000017g016926.A	0	0	0	0	0	0	0	0				Cup000006g006631.1	Cup000029g023494.1	Cup000033g025704.1
Cup000017g016927.1	0	0	0	0	0	0	0	0				Cup000041g029029.1	Cup000055g033565.1	Cup000227g043618.1
Cup000017g016928.A	0	0	0	0	0	0	0	0				Cup000017g016466.1	Cup000098g039250.1	Cup000104g039810.1
Cup000017g016934.1	0	0	0	0	0	0	0	0				Cup000032g025406.1	Cup000054g033366.1	Cup000041g029119.1
Cup000017g016941.1	0	0	0	0	0	0	0	0				Cup000051g032438.1	Cup000005g005202.1	Cup000021g019466.A
Cup000017g016951.A	0	0	0	0	0	0	0	0				Cup000009g009136.1	Cup000001g000407.1	Cup000013g013605.1
Cup000017g016956.1	0	0	0	0	0	0	0	0				Cup000060g034565.1	Cup001051g045491.1	Cup000010g010232.1
Cup000017g016970.A	0	0	0	0	0	0	0	0				Cup000022g019777.1	Cup000450g044601.1	Cup000027g022748.1
Cup000017g016972.A	0	0	0	0	0	0	0	0				Cup000030g024089.1	Cup000065g035466.1	Cup000009g009845.1
Cup000017g016983.1	0	0	0	0	0	0	0	0				Cup000010g010446.1	Cup000016g015921.1	Cup000044g030162.A
Cup000017g016988.1	0	0	0	0	0	0	0	0				Cup000023g020368.1	Cup000012g012421.1	Cup000083g037522.1
Cup000017g016997.A	0	0	0	0	0	0	0	0				Cup000024g021119.1	Cup000017g016301.1	Cup000006g006098.1
Cup000017g017001.A	0	0	0	0	0	0	0	0				Cup000015g014979.1	Cup000018g017108.1	Cup000004g004654.1
Cup000017g017004.1	0	0	0	0	0	0	0	0				Cup000005g004992.1	Cup000003g002757.1	Cup000040g028606.1
Cup000017g017006.A	0	0	0	0	0	0	0	0				Cup000021g019359.1	Cup000267g043915.1	Cup000014g014667.1
Cup000017g017009.1	0	0	0	0	0	0	0	0				Cup000007g007155.1	Cup000023g020297.1	Cup000134g041304.1
Cup000017g017011.1	0	0	0	0	0	0	0	0				Cup000009g009733.1	Cup000169g042622.1	Cup000014g014400.1
Cup000017g017014.1	0	0	0	0	0	0	0	0				Cup000031g024544.1	Cup000030g024440.1	Cup000103g039593.A
Cup000017g017017.1	0	0	0	0	0	0	0	0				Cup000003g002587.1	Cup000035g026857.1	Cup000013g013308.1
Cup000017g017019.A	0	0	0	0	0	0	0	0				Cup000011g011378.1	Cup000050g032304.A	Cup000006g006277.1
Cup000017g017022.1	0	0	0	0	0	0	0	0				Cup000026g022315.1	Cup000094g038819.1	Cup000086g037907.1
Cup000017g017030.A	0	0	0	0	0	0	0	0				Cup000021g019483.1	Cup000023g020547.1	Cup000063g035108.1
Cup000017g017034.A	0	0	0	0	0	0	0	0				Cup000055g033595.1	Cup000117g040523.A	Cup000007g007047.1
Cup000018g017038.A	0	0	0	0	0	0	0	0				Cup000042g029567.1	Cup000197g043287.1	Cup000030g024459.A
Cup000018g017039.1	0	0	0	0	0	0	0	0				Cup000028g023163.1	Cup000052g032852.A	Cup000039g028421.A
Cup000018g017040.A	0	0	0	0	0	0	0	0				Cup000023g020260.1	Cup000010g010860.1	Cup000143g041662.1
Cup000018g017049.A	0	0	0	0	0	0	0	0				Cup000037g027552.1	Cup000013g013652.1	Cup000013g013046.1
Cup000018g017056.A	0	0	0	0	0	0	0	0				Cup000013g013730.1	Cup000032g025364.1	Cup000030g024080.1
Cup000018g017075.A	0	0	0	0	0	0	0	0				Cup000154g042126.1	Cup000008g008064.1	Cup000096g039068.1
Cup000018g017082.A	0	0	0	0	0	0	0	0				Cup000117g040494.1	Cup000005g005096.1	Cup000017g016789.1
Cup000018g017098.A	0	0	0	0	0	0	0	0				Cup000154g042118.1	Cup000015g014940.1	Cup000161g042338.1
Cup000018g017099.1	0	0	0	0	0	0	0	0				Cup000014g014709.1	Cup000002g002145.1	Cup000062g034804.1
Cup000018g017111.A	0	0	0	0	0	0	0	0				Cup000117g040528.A	Cup000053g033192.1	Cup000030g024062.1
Cup000018g017146.A	0	0	0	0	0	0	0	0				Cup000127g040924.1	Cup000009g009536.A	Cup000036g027139.1
Cup000018g017159.1	0	0	0	0	0	0	0	0				Cup000004g003694.1	Cup000005g005572.A	Cup000202g043334.1
Cup000018g017169.1	0	0	0	0	0	0	0	0				Cup000096g039028.1	Cup000013g013293.1	Cup000057g033983.1
Cup000018g017188.1	0	0	0	0	0	0	0	0				Cup000029g023394.1	Cup000042g029538.1	Cup000020g018897.1
Cup000018g017225.1	0	0	0	0	0	0	0	0				Cup000091g038457.1	Cup000038g027650.1	Cup000041g029017.1
Cup000018g017245.A	0	0	0	0	0	0	0	0				Cup000038g028017.1	Cup000005g005538.1	Cup000026g021924.1
Cup000018g017246.A	0	0	0	0	0	0	0	0				Cup000010g010806.1	Cup000016g015674.1	Cup000005g005035.1
Cup000018g017252.A	0	0	0	0	0	0	0	0				Cup000007g007567.1	Cup000006g006655.1	Cup000007g007677.1
Cup000018g017256.1	0	0	0	0	0	0	0	0				Cup000054g033228.1	Cup000031g024704.1	Cup000047g031591.A
Cup000018g017268.1	0	0	0	0	0	0	0	0				Cup000103g039612.1	Cup000015g015177.1	Cup000003g002798.1
Cup000018g017287.1	0	0	0	0	0	0	0	0				Cup000090g038266.1	Cup000013g013882.1	Cup000124g040837.1
Cup000018g017290.A	0	0	0	0	0	0	0	0				Cup000001g000850.1	Cup000017g016313.1	Cup000022g019993.1
Cup000018g017292.A	0	0	0	0	0	0	0	0				Cup000006g006040.1	Cup000010g011141.1	Cup000013g013093.1
Cup000018g017298.A	0	0	0	0	0	0	0	0				Cup000010g010868.1	Cup000004g004632.1	Cup000135g041336.1
Cup000018g017308.A	0	0	0	0	0	0	0	0				Cup000013g013059.1	Cup000050g032233.A	Cup000015g015007.1
Cup000018g017309.A	0	0	0	0	0	0	0	0				Cup000017g016810.1	Cup000058g034162.1	Cup000169g042621.1
Cup000018g017318.A	0	0	0	0	0	0	0	0				Cup000073g036555.1	Cup000046g031013.1	Cup000036g027194.1
Cup000018g017329.A	0	0	0	0	0	0	0	0				Cup000009g009011.1	Cup000074g036736.1	Cup000002g002098.1
Cup000018g017333.A	0	0	0	0	0	0	0	0				Cup000018g017501.1	Cup000017g016219.A	Cup000022g019797.1
Cup000018g017338.A	0	0	0	0	0	0	0	0				Cup000011g011927.1	Cup000001g001285.1	Cup000083g037448.1
Cup000018g017341.A	0	0	0	0	0	0	0	0				Cup000006g006596.1	Cup000014g014274.1	Cup000208g043440.1
Cup000018g017342.A	0	0	0	0	0	0	0	0				Cup000094g038881.1	Cup000020g018462.1	Cup000026g021896.1
Cup000018g017350.A	0	0	0	0	0	0	0	0				Cup000001g001133.1	Cup000002g002266.1	Cup000085g037836.1
Cup000018g017357.A	0	0	0	0	0	0	0	0				Cup000035g026950.1	Cup000003g002893.1	Cup000006g006803.1
Cup000018g017359.A	0	0	0	0	0	0	0	0				Cup000004g003863.1	Cup000150g041940.1	Cup000019g018288.A
Cup000018g017360.A	0	0	0	0	0	0	0	0				Cup000100g039364.1	Cup000003g003300.1	Cup000003g002774.1
Cup000018g017363.1	0	0	0	0	0	0	0	0				Cup000065g035332.1	Cup000023g020239.1	Cup000029g023479.1
Cup000018g017365.1	0	0	0	0	0	0	0	0				Cup000841g045286.1	Cup000043g030029.1	Cup000048g031618.1
Cup000018g017368.A	0	0	0	0	0	0	0	0				Cup000019g017949.1	Cup000004g003782.1	Cup000132g041172.1
Cup000018g017379.A	0	0	0	0	0	0	0	0				Cup000004g003805.1	Cup000023g020407.A	Cup000044g030420.1
Cup000018g017383.A	0	0	0	0	0	0	0	0				Cup000048g031666.1	Cup000020g018420.1	Cup000043g029880.1
Cup000018g017387.1	0	0	0	0	0	0	0	0				Cup000005g005186.1	Cup000006g006638.1	Cup000028g023156.A
Cup000018g017389.A	0	0	0	0	0	0	0	0				Cup000012g012635.1	Cup000018g017277.1	Cup000010g010766.1
Cup000018g017398.A	0	0	0	0	0	0	0	0				Cup000043g030137.1	Cup000004g003642.1	Cup000052g032906.1
Cup000018g017402.A	0	0	0	0	0	0	0	0				Cup000018g017153.1	Cup000002g002160.1	Cup000004g004618.1
Cup000018g017428.1	0	0	0	0	0	0	0	0				Cup000037g027557.1	Cup000019g017794.1	Cup000002g002127.1
Cup000018g017432.1	0	0	0	0	0	0	0	0				Cup000005g005654.1	Cup000017g016490.1	Cup000064g035135.1
Cup000018g017447.1	0	0	0	0	0	0	0	0				Cup000005g005722.1	Cup000005g005979.A	Cup000091g038346.1
Cup000018g017453.A	0	0	0	0	0	0	0	0				Cup000036g027141.1	Cup000020g018480.1	Cup000097g039111.1
Cup000018g017462.A	0	0	0	0	0	0	0	0				Cup000028g023219.1	Cup000267g043921.A	Cup000007g007038.1
Cup000018g017475.A	0	0	0	0	0	0	0	0				Cup000001g000130.A	Cup000014g014779.1	Cup000076g036885.A
Cup000018g017491.A	0	0	0	0	0	0	0	0				Cup000028g022968.1	Cup000020g018616.1	Cup000011g011618.1
Cup000018g017503.A	0	0	0	0	0	0	0	0				Cup000066g035678.A	Cup000010g010403.1	Cup000042g029649.1
Cup000018g017513.1	0	0	0	0	0	0	0	0				Cup000025g021441.1	Cup000037g027510.1	Cup000074g036664.1
Cup000018g017517.1	0	0	0	0	0	0	0	0				Cup000067g035927.1	Cup000004g004460.1	Cup000065g035471.1
Cup000018g017567.1	0	0	0	0	0	0	0	0				Cup000049g031956.1	Cup000014g014234.1	Cup000001g001060.A
Cup000018g017571.1	0	0	0	0	0	0	0	0				Cup000144g041694.1	Cup000055g033474.1	Cup000008g008418.A
Cup000018g017620.A	0	0	0	0	0	0	0	0				Cup000064g035228.1	Cup000103g039684.1	Cup001139g045578.1
Cup000018g017624.A	0	0	0	0	0	0	0	0				Cup003989g046599.1	Cup000021g019373.1	Cup000063g035092.1
Cup000018g017627.A	0	0	0	0	0	0	0	0				Cup000001g000257.1	Cup000030g024219.A	Cup000051g032644.1
Cup000018g017628.1	0	0	0	0	0	0	0	0				Cup000101g039481.1	Cup000017g016432.1	Cup000638g044978.1
Cup000018g017642.1	0	0	0	0	0	0	0	0				Cup000030g024231.1	Cup000019g018226.1	Cup000029g023680.A
Cup000018g017643.A	0	0	0	0	0	0	0	0				Cup000022g020093.1	Cup000013g013765.1	Cup000498g044755.1
Cup000018g017645.1	0	0	0	0	0	0	0	0				Cup000053g033065.1	Cup000029g023478.1	Cup000005g005089.1
Cup000018g017651.1	0	0	0	0	0	0	0	0				Cup000003g002835.1	Cup000038g027700.1	Cup000022g020011.1
[truncated: 31,391 more rows]

## Sheet: (2) DEGs
UP regulated genes						Down regulated genes						Private expressed DEGs		Overlapped DEGs
Gene ID	logFC	P-value	FDR			Gene ID	logFC	P-value	FDR			381_PRIVATE_Expressed Genes_DEGs	TF_PRIVATE_Expressed Genes_DEGs	Up_Overlapped	Down_Overlapped
Cup001195g045603.1	4.62226	1.35959e-70	2.35344e-67			Cup000032g025481.A	-6.16773	6.9426e-68	1.01688e-64			Cup000021g019119.1	Cup000388g044429.1	Cup000130g041070.A	Cup000032g025483.A
Cup000422g044515.1	3.76805	1.6722e-27	3.38727e-25			Cup001022g045471.1	-6.07855	1.51511e-70	2.4041e-67			Cup000003g003423.1	Cup000972g045444.A	Cup000008g008490.1	Cup000038g027923.A
Cup000082g037411.A	3.54405	1.08457e-25	1.79577e-23			Cup000032g025462.1	-5.75004	3.20384e-64	3.38913e-61			Cup000048g031801.1	Cup000024g021169.1	Cup000037g027491.1	Cup000065g035413.A
Cup000044g030175.1	3.39337	1.53394e-29	3.6177e-27			Cup000032g025483.A	-5.41572	3.56103e-133	6.78055e-129			Cup000015g015219.1	Cup000032g025340.1	Cup000040g028561.1	Cup000032g025074.1
Cup000130g041070.A	3.21499	2.13342e-27	4.2315e-25			Cup000024g020776.A	-5.03646	1.03842e-58	8.9875e-56			Cup000040g028532.1	Cup002084g046087.1	Cup000050g032266.1	Cup000008g008937.A
Cup000008g008490.1	2.6456	2.72028e-27	5.33988e-25			Cup000008g008405.A	-4.60489	8.57948e-33	2.43824e-30			Cup000011g011767.1	Cup000023g020523.1	Cup000003g003450.1	Cup000024g020793.A
Cup000097g039202.A	2.64328	2.11851e-11	5.33579e-10			Cup000038g027923.A	-4.56067	7.05614e-96	2.68712e-92			Cup000016g015998.1	Cup000032g025113.A	Cup000002g001998.A	Cup000024g020701.1
Cup000017g016594.1	2.61836	5.15058e-14	1.94588e-12			Cup000024g021169.1	-4.51422	3.45733e-32	9.40444e-30			Cup000035g026539.1	Cup002888g046392.1	Cup000030g024377.1	Cup000206g043388.1
Cup000037g027491.1	2.59083	4.17863e-65	4.68031e-62			Cup000023g020523.1	-4.46431	8.11002e-36	2.85801e-33			Cup000039g028343.1	Cup000032g025158.1	Cup000018g017445.1	Cup000024g021240.A
Cup000040g028561.1	2.58521	4.79922e-18	3.22905e-16			Cup000139g041443.1	-4.2823	3.66298e-77	8.71835e-74			Cup000062g034823.1	Cup000032g025481.A	Cup000093g038693.1	Cup000006g006800.1
Cup000014g014449.A	2.56131	1.53965e-13	5.399e-12			Cup000018g017456.1	-4.24416	2.73549e-36	1.00166e-33			Cup000024g020751.1	Cup000032g025420.1	Cup000171g042714.1	Cup000003g003172.1
Cup000050g032266.1	2.52632	4.11571e-21	3.93805e-19			Cup002347g046175.1	-4.06347	2.45661e-62	2.33882e-59			Cup000009g009311.1	Cup001022g045471.1	Cup000040g028560.1	Cup000040g028744.1
Cup000003g003450.1	2.51493	1.43214e-28	3.0988e-26			Cup000968g045439.1	-4.02394	2.10712e-29	4.83395e-27			Cup000001g001122.1	Cup000008g008405.A	Cup000094g038857.1	Cup000002g002044.1
Cup000002g001998.A	2.47357	2.65583e-40	1.40471e-37			Cup000032g025091.1	-3.93089	1.10145e-75	2.09727e-72			Cup000038g027903.1	Cup000004g003900.1	Cup000003g003324.1	Cup000004g004527.1
Cup000007g007244.1	2.4434	9.34601e-17	5.28063e-15			Cup000001g001147.1	-3.84632	4.15935e-66	5.27988e-63			Cup000017g016493.1	Cup000024g020776.A	Cup000003g003360.1	Cup000034g026250.1
Cup000030g024377.1	2.37074	3.25068e-20	2.73877e-18			Cup000032g025189.1	-3.84494	3.42274e-49	2.24733e-46			Cup000049g032103.1	Cup000032g025462.1	Cup000027g022524.1	Cup000024g020794.A
Cup000018g017445.1	2.32204	3.5239e-50	2.58071e-47			Cup000007g007753.1	-3.83888	1.91412e-50	1.45787e-47			Cup000014g014636.1	Cup000016g016027.A	Cup000045g030648.1	Cup000024g021236.A
Cup000093g038693.1	2.30434	1.76522e-34	5.69686e-32			Cup000024g021183.A	-3.76334	5.80682e-23	6.9842e-21			Cup000015g015041.A	Cup000139g041443.1	Cup000007g007136.1	Cup000038g027733.A
Cup000171g042714.1	2.27749	5.83209e-23	6.9842e-21			Cup000024g021210.1	-3.68042	6.5938e-24	8.71892e-22			Cup000027g022727.1	Cup000024g020792.1	Cup000008g008953.1	Cup000003g003210.1
Cup000040g028560.1	2.27616	6.50363e-17	3.72999e-15			Cup000008g008093.1	-3.6682	5.03377e-47	2.99525e-44			Cup000003g002945.1	Cup000968g045439.1	Cup000210g043477.A	Cup000018g017515.1
Cup000094g038857.1	2.24195	1.34565e-33	4.2004e-31			Cup000065g035413.A	-3.66236	1.48136e-76	3.13406e-73			Cup000117g040539.1	Cup000014g014216.A	Cup000040g028725.1	Cup000051g032701.1
Cup000003g003324.1	2.22051	2.01091e-25	3.21763e-23			Cup000003g002611.1	-3.63374	1.09607e-83	2.98146e-80			Cup000052g032752.1	Cup000122g040722.1	Cup000016g015415.1	Cup000024g020712.1
Cup000081g037292.1	2.20558	1.30071e-09	2.34312e-08			Cup000388g044429.1	-3.62054	2.02808e-18	1.44632e-16			Cup000197g043283.1	Cup000024g021088.1	Cup000005g005049.1	Cup000048g031875.A
Cup000006g006144.1	2.18386	1.72746e-10	3.73354e-09			Cup000024g020792.1	-3.60847	1.39574e-25	2.25222e-23			Cup000003g002930.1	Cup000032g025220.A	Cup000038g028023.1	Cup000051g032604.1
Cup000042g029489.1	2.17092	2.72575e-15	1.21833e-13			Cup000024g021088.1	-3.51755	3.65768e-22	4.04918e-20			Cup000498g044757.A	Cup000010g010427.1	Cup000001g001195.1	Cup000101g039417.1
Cup000003g003360.1	2.17046	1.79162e-27	3.59097e-25			Cup000010g010314.A	-3.48065	1.77399e-28	3.79535e-26			Cup000004g004881.1	Cup000067g035919.1	Cup000011g012095.1	Cup000040g028572.1
Cup000027g022524.1	2.16714	3.55433e-13	1.18318e-11			Cup000008g008320.1	-3.37472	7.99914e-21	7.39377e-19			Cup000005g005011.1	Cup000023g020244.1	Cup000014g014654.A	Cup000035g026576.1
Cup000010g010367.1	2.15755	9.03305e-08	1.13755e-06			Cup000182g042991.1	-3.34748	1.48645e-23	1.8869e-21			Cup000013g013181.1	Cup000018g017456.1	Cup000008g008660.1	Cup000018g017278.1
Cup000045g030648.1	2.13425	2.2785e-10	4.78861e-09			Cup000017g016340.1	-3.30997	4.40512e-29	9.86798e-27			Cup000021g019498.1	Cup000032g025477.A	Cup000021g019457.1	Cup000002g001834.A
Cup000007g007136.1	2.13409	4.02232e-22	4.40166e-20			Cup000032g025074.1	-3.2996	1.30686e-87	4.14731e-84			Cup000013g013000.1	Cup000003g002638.1	Cup000005g004931.1	Cup000096g039007.1
Cup000008g008953.1	2.09764	6.93791e-20	5.50436e-18			Cup000008g008937.A	-3.27153	7.01088e-16	3.47641e-14			Cup000009g009265.1	Cup000024g021183.A	Cup000039g028257.1	Cup000022g019644.1
Cup000210g043477.A	2.0853	3.53802e-09	5.93545e-08			Cup000024g020793.A	-3.2185	3.46537e-102	2.19947e-98			Cup000054g033394.1	Cup000002g002447.1	Cup000069g036158.A	Cup000045g030942.A
Cup000040g028725.1	2.07105	3.54848e-19	2.64967e-17			Cup000016g016027.A	-3.12402	4.45064e-18	3.00513e-16			Cup000038g028030.1	Cup000008g008320.1	Cup000120g040661.1	Cup000032g025311.1
Cup000016g015415.1	2.05847	2.18038e-20	1.88712e-18			Cup000004g003828.1	-3.12299	1.1181e-28	2.44709e-26			Cup000140g041499.1	Cup000014g014586.1	Cup000031g024690.1	Cup000013g013128.1
Cup000025g021699.1	2.04505	7.20627e-08	9.2817e-07			Cup000024g020701.1	-3.11821	2.16818e-36	8.09498e-34			Cup000033g025906.1	Cup000197g043300.A	Cup000016g016015.1	Cup000008g008558.1
Cup000001g000960.1	2.03887	2.99573e-12	8.6296e-11			Cup000206g043388.1	-3.11162	2.64969e-61	2.40251e-58			Cup000352g044299.1	Cup000029g023659.1	Cup000031g024773.1	Cup000003g003224.1
Cup000005g005049.1	2.03552	6.0304e-10	1.17482e-08			Cup000032g025340.1	-3.09548	1.59682e-13	5.57145e-12			Cup000015g015229.1	Cup003335g046484.1	Cup000016g015614.1	Cup000056g033822.1
Cup000038g028023.1	2.02662	6.54413e-37	2.59598e-34			Cup000068g036008.1	-3.06405	5.75802e-15	2.48051e-13			Cup000013g013316.1	Cup000005g005675.A	Cup000049g032113.1	Cup000032g025373.A
Cup000001g001195.1	2.02465	1.07771e-29	2.63086e-27			Cup000032g025158.1	-3.03444	1.61017e-14	6.45458e-13			Cup000003g003178.1	Cup000008g008843.1	Cup000047g031436.1	Cup000018g017193.1
Cup000018g017088.A	2.02126	9.78961e-07	9.72374e-06			Cup000024g021240.A	-3.03126	1.19792e-100	5.70238e-97			Cup000022g019808.1	Cup000038g028143.1	Cup000005g005942.1	Cup000024g020819.1
Cup000032g025416.1	2.01855	1.54487e-10	3.38504e-09			Cup000032g025477.A	-3.02499	8.05465e-15	3.40819e-13			Cup000015g014969.1	Cup000065g035474.1	Cup000080g037216.1	Cup000069g036138.1
Cup000011g012095.1	2.01808	5.76834e-50	3.92268e-47			Cup000032g025170.A	-2.99922	7.50688e-48	4.61092e-45			Cup000713g045109.1	Cup000064g035159.1	Cup000029g023501.1	Cup000028g023124.A
Cup000014g014654.A	2.00967	8.42992e-21	7.75431e-19			Cup000003g002638.1	-2.97875	2.76253e-20	2.33784e-18			Cup000024g020742.1	Cup000008g008054.1	Cup001882g045990.1	Cup000055g033465.1
Cup000008g008660.1	2.00736	1.73778e-20	1.53191e-18			Cup000032g025113.A	-2.97873	7.6389e-14	2.77581e-12			Cup000001g000955.A	Cup000068g036008.1	Cup000006g006668.1	Cup000012g012830.1
Cup000021g019457.1	2.00525	4.68891e-39	2.28927e-36			Cup000016g016005.1	-2.92031	7.28359e-22	7.57851e-20			Cup000030g024042.1	Cup000161g042315.1	Cup000679g045055.1	Cup000032g025328.A
Cup000005g004931.1	2.00203	2.10455e-38	9.77385e-36			Cup000024g020764.A	-2.91902	1.21094e-16	6.7223e-15			Cup000006g006080.1	Cup000051g032440.1	Cup000030g024422.1	Cup000032g025138.A
Cup000039g028257.1	1.99499	2.22677e-33	6.8387e-31			Cup000006g006800.1	-2.9147	1.56438e-67	2.12767e-64			Cup000006g006536.1	Cup000032g025185.1	Cup000033g025903.1	Cup000003g002600.1
Cup000011g011908.1	1.99448	1.35585e-14	5.49294e-13			Cup000009g009640.1	-2.89081	2.0621e-25	3.27204e-23			Cup000049g032128.1	Cup000043g030088.1	Cup000018g017089.1	Cup000013g013537.1
Cup000069g036158.A	1.9891	2.37408e-21	2.3182e-19			Cup000061g034769.1	-2.88299	1.45119e-39	7.46812e-37			Cup000038g027710.1	Cup000050g032204.1	Cup000060g034335.1	Cup000160g042303.1
Cup000120g040661.1	1.98752	2.31227e-43	1.25794e-40			Cup000003g003172.1	-2.82884	5.59753e-103	5.32912e-99			Cup000011g012008.1	Cup000008g008567.A	Cup000258g043874.1	Cup000013g013724.1
Cup000031g024690.1	1.97993	6.94346e-16	3.45197e-14			Cup000770g045178.1	-2.82329	1.38487e-15	6.43155e-14			Cup000551g044850.1	Cup000196g043275.1	Cup000017g016254.1	Cup000013g013810.1
Cup000016g016015.1	1.97371	3.77796e-25	5.7549e-23			Cup000040g028744.1	-2.82005	1.37651e-36	5.24202e-34			Cup000019g017935.1	Cup000032g025444.1	Cup000004g004668.1	Cup000107g039991.1
Cup000090g038265.1	1.96088	5.0695e-07	5.35692e-06			Cup002888g046392.1	-2.80096	5.27394e-11	1.24284e-09			Cup000015g015022.1	Cup000008g008083.1	Cup000024g020684.1	Cup000022g019643.1
Cup000031g024773.1	1.94865	1.11484e-14	4.5848e-13			Cup000002g002044.1	-2.80015	2.74605e-29	6.2247e-27			Cup000034g026182.1	Cup000033g025613.1	Cup000010g010874.1	Cup000003g002665.1
Cup000016g015614.1	1.94716	5.1535e-25	7.7266e-23			Cup000004g004527.1	-2.79782	1.43893e-29	3.46818e-27			Cup000030g024255.1	Cup000175g042814.1	Cup000025g021626.1	Cup000044g030227.1
Cup000049g032113.1	1.93933	1.93764e-06	1.8015e-05			Cup000034g026250.1	-2.79405	7.65318e-25	1.1124e-22			Cup000536g044819.1	Cup000003g002668.A	Cup000008g008597.1	Cup000023g020334.1
Cup000047g031436.1	1.93745	8.80567e-21	8.06099e-19			Cup000038g028143.1	-2.78731	3.46032e-12	9.90797e-11			Cup000055g033604.1	Cup000050g032226.1	Cup000033g025943.1	Cup000004g003772.1
Cup000020g018774.1	1.92991	4.45737e-08	6.03218e-07			Cup000032g025420.1	-2.78352	2.77921e-11	6.85112e-10			Cup000056g033669.1	Cup000003g002661.1	Cup000022g019719.1	Cup000042g029758.1
Cup000005g005942.1	1.92778	1.34794e-22	1.54616e-20			Cup000008g008560.1	-2.77969	1.30915e-37	5.66536e-35			Cup000013g013643.A	Cup000007g007051.1	Cup000029g023654.1	Cup000006g006149.1
Cup000021g019464.1	1.92507	4.62783e-11	1.10149e-09			Cup000032g025147.1	-2.75861	1.05102e-23	1.37072e-21			Cup000024g021102.1	Cup000008g008672.1	Cup000007g007727.1	Cup000157g042210.1
Cup000080g037216.1	1.92295	5.1794e-09	8.39327e-08			Cup000032g025220.A	-2.69774	2.1636e-11	5.44215e-10			Cup000004g004663.A	Cup000083g037532.1	Cup000025g021675.1	Cup000014g014666.1
Cup000029g023501.1	1.90521	1.47827e-21	1.48146e-19			Cup000972g045444.A	-2.68322	3.75637e-10	7.61783e-09			Cup000013g013039.1	Cup000008g008093.1	Cup000035g027008.1	Cup000012g012389.A
Cup000008g008193.1	1.89009	3.05944e-08	4.25528e-07			Cup000003g002593.1	-2.67315	6.21067e-31	1.59807e-28			Cup000020g018459.1	Cup000168g042531.1	Cup000028g023173.1	Cup000004g004409.1
Cup000049g032128.1	1.88891	9.33309e-08	1.16992e-06			Cup000066g035627.1	-2.66351	6.85524e-18	4.54811e-16			Cup000038g028065.1	Cup000028g022951.1	Cup000017g016764.1	Cup000025g021685.1
Cup001882g045990.1	1.88479	1.17108e-20	1.05681e-18			Cup000005g005675.A	-2.64078	5.36238e-11	1.26056e-09			Cup000021g019231.1	Cup002868g046386.1	Cup000010g010637.A	Cup000107g040074.1
Cup000006g006668.1	1.88136	1.0946e-15	5.18464e-14			Cup000024g020794.A	-2.61487	1.02551e-52	8.48989e-50			Cup000001g000960.1	Cup000001g000439.1	Cup000013g012999.1	Cup000032g025372.1
Cup000679g045055.1	1.87835	2.49117e-19	1.87487e-17			Cup000003g002681.1	-2.59422	2.02776e-24	2.86005e-22			Cup000016g015594.1	Cup000034g026230.1	Cup000014g014564.1	Cup000005g005151.1
Cup000030g024422.1	1.8756	4.24205e-09	6.99939e-08			Cup000006g006785.1	-2.59091	3.1837e-18	2.20439e-16			Cup000083g037437.1	Cup000031g024611.1	Cup000017g016384.1	Cup000017g016418.1
Cup000033g025903.1	1.86148	1.30018e-21	1.32389e-19			Cup000247g043748.1	-2.5663	2.50054e-11	6.20767e-10			Cup000035g026675.1	Cup000035g026788.1	Cup000040g028886.1	Cup000008g008708.1
Cup000022g019802.1	1.85308	2.38838e-06	2.15634e-05			Cup000022g019683.1	-2.56472	2.86388e-17	1.71482e-15			Cup000007g007656.1	Cup000044g030147.1	Cup000081g037342.1	Cup000003g002614.1
Cup000018g017089.1	1.83781	2.74788e-38	1.24577e-35			Cup000024g021236.A	-2.55796	1.15331e-19	9.00004e-18			Cup000052g032987.A	Cup000149g041920.1	Cup000022g019638.1	Cup000003g002616.1
Cup000025g021749.1	1.83534	2.40378e-07	2.71634e-06			Cup000038g027733.A	-2.5565	1.72248e-48	1.09326e-45			Cup000175g042823.1	Cup000052g032908.1	Cup000060g034484.1	Cup000083g037496.1
Cup000060g034335.1	1.82746	5.41251e-22	5.72553e-20			Cup000004g003900.1	-2.54179	1.20143e-09	2.18704e-08			Cup000018g017203.1	Cup000048g031837.1	Cup000033g025979.1	Cup000009g009619.1
Cup000258g043874.1	1.81204	1.50026e-10	3.29106e-09			Cup000003g003210.1	-2.53819	2.09838e-21	2.07022e-19			Cup000077g037046.1	Cup000014g014553.1	Cup000008g008650.1	Cup000044g030285.A
Cup000083g037550.1	1.78699	1.84376e-08	2.67788e-07			Cup000055g033553.1	-2.53724	4.43476e-27	8.52952e-25			Cup000108g040188.1	Cup000042g029722.1	Cup000039g028210.1	Cup000025g021288.1
Cup000017g016254.1	1.77722	1.21925e-15	5.74648e-14			Cup000796g045222.A	-2.52603	6.11331e-25	9.09402e-23			Cup000014g014629.1	Cup000206g043377.1	Cup000001g001181.A	Cup000024g020808.1
Cup000004g004668.1	1.77477	1.95081e-18	1.39644e-16			Cup000122g040722.1	-2.52598	5.21327e-10	1.0276e-08			Cup000025g021621.1	Cup000080g037214.1	Cup000014g014182.1	Cup000028g023092.A
Cup000024g020684.1	1.76936	6.20147e-29	1.37305e-26			Cup000018g017515.1	-2.51543	6.99331e-38	3.09673e-35			Cup000028g022899.1	Cup000067g035944.1	Cup000011g011302.1	Cup000005g004898.1
Cup000010g010874.1	1.76286	1.02972e-14	4.28378e-13			Cup000043g030088.1	-2.4975	3.02973e-16	1.57191e-14			Cup000063g035080.1	Cup000007g007317.1	Cup000028g022904.1	Cup000014g014743.1
Cup000055g033604.1	1.76236	3.71718e-06	3.19832e-05			Cup000012g012227.1	-2.48489	1.24468e-17	7.97976e-16			Cup000024g020685.1	Cup000029g023887.A	Cup000026g022031.1	Cup000004g004660.1
Cup000025g021626.1	1.75354	5.91244e-33	1.78697e-30			Cup000051g032701.1	-2.48288	2.51785e-11	6.24251e-10			Cup000022g019802.1	Cup000770g045178.1	Cup000017g016267.1	Cup000032g025137.1
Cup000008g008597.1	1.75294	1.36056e-13	4.81531e-12			Cup000024g020712.1	-2.47887	1.02496e-15	4.87904e-14			Cup000008g008292.1	Cup000032g025091.1	Cup000013g013894.1	Cup000032g025207.1
Cup000033g025943.1	1.74821	1.62666e-10	3.5398e-09			Cup000007g008030.1	-2.47805	4.37071e-22	4.74789e-20			Cup000020g018835.1	Cup000026g022257.1	Cup000014g014219.1	Cup000032g025350.1
Cup000022g019719.1	1.74447	1.35726e-24	1.94312e-22			Cup000002g002035.1	-2.47094	6.1641e-14	2.2924e-12			Cup000017g016300.1	Cup000014g014658.1	Cup000015g015314.A	Cup000021g019403.1
Cup000004g003866.1	1.744	2.88458e-08	4.02973e-07			Cup000048g031875.A	-2.45826	2.67434e-23	3.35014e-21			Cup000062g034963.1	Cup000011g011780.A	Cup000077g037054.1	Cup000147g041855.1
Cup000029g023654.1	1.73907	1.41378e-20	1.2698e-18			Cup000010g010427.1	-2.44741	4.15707e-10	8.36732e-09			Cup000018g017461.1	Cup000027g022760.1	Cup000097g039135.1	Cup000012g012713.1
Cup000007g007727.1	1.73759	1.03021e-07	1.27296e-06			Cup000051g032604.1	-2.40733	2.6002e-32	7.28093e-30			Cup000042g029489.1	Cup000050g032205.1	Cup000011g011834.1	Cup000006g006959.A
Cup000025g021675.1	1.72998	2.36175e-20	2.02568e-18			Cup000101g039417.1	-2.38808	6.32462e-66	7.52669e-63			Cup000009g009188.1	Cup000011g011417.1	Cup000004g003771.1	Cup000032g025307.1
Cup000020g018835.1	1.72975	3.63585e-08	5.00942e-07			Cup000003g002661.1	-2.38735	1.60936e-12	4.8487e-11			Cup000064g035272.1	Cup000412g044482.1	Cup000051g032663.1	Cup000014g014742.1
Cup000035g027008.1	1.72864	6.61099e-26	1.12393e-23			Cup000040g028572.1	-2.38546	1.86887e-39	9.36453e-37			Cup000002g002002.1	Cup000032g025189.1	Cup000031g024804.1	Cup000032g025177.1
Cup000013g013612.1	1.72536	7.77061e-09	1.21878e-07			Cup000035g026576.1	-2.3692	6.59003e-30	1.65106e-27			Cup000003g002694.1	Cup000003g002611.1	Cup000011g011539.A	Cup000016g016206.1
Cup000028g023173.1	1.72246	2.12143e-20	1.84448e-18			Cup000018g017278.1	-2.36431	2.35966e-15	1.0647e-13			Cup000018g017062.1	Cup000033g025973.1	Cup000002g001764.1	Cup000083g037508.1
Cup000017g016764.1	1.71906	1.4128e-16	7.70806e-15			Cup000002g001834.A	-2.35471	5.78241e-10	1.12926e-08			Cup000002g001583.1	Cup000001g001046.1	Cup000063g035048.1	Cup000018g017523.A
Cup000010g010637.A	1.70266	5.52888e-06	4.55146e-05			Cup000096g039007.1	-2.34787	1.69913e-24	2.41442e-22			Cup000016g015505.1	Cup000003g002615.A	Cup000041g029071.1	Cup000049g032014.1
Cup000013g012999.1	1.69425	7.47233e-12	2.02391e-10			Cup000024g021133.1	-2.34714	3.59097e-24	4.88398e-22			Cup000202g043334.1	Cup000030g023952.1	Cup000010g010395.1	Cup000002g002423.A
Cup000014g014564.1	1.68909	5.87003e-15	2.51737e-13			Cup000022g019644.1	-2.33207	1.13909e-16	6.36055e-15			Cup000026g021924.1	Cup000016g015406.1	Cup000009g009834.1	Cup000024g020754.1
Cup000054g033267.1	1.68881	5.5798e-17	3.21954e-15			Cup003335g046484.1	-2.32868	7.34645e-09	1.15894e-07			Cup000029g023396.1	Cup000001g000096.1	Cup000074g036647.1	Cup000012g012698.1
Cup000017g016384.1	1.68781	6.11777e-28	1.26618e-25			Cup002084g046087.1	-2.31278	9.29877e-08	1.16639e-06			Cup000013g013563.1	Cup000020g018566.1	Cup000175g042840.1	Cup000039g028225.1
Cup000083g037430.1	1.68646	6.21778e-08	8.14255e-07			Cup000194g043211.1	-2.3047	4.02863e-08	5.50676e-07			Cup000020g018774.1	Cup000066g035627.1	Cup000098g039317.1	Cup000098g039235.1
Cup000040g028886.1	1.68273	2.82721e-15	1.26072e-13			Cup000045g030942.A	-2.27897	9.75175e-13	3.05403e-11			Cup000016g015560.1	Cup000012g012425.1	Cup000014g014255.1	Cup000008g008557.1
Cup000081g037342.1	1.67618	1.68641e-50	1.33795e-47			Cup000032g025311.1	-2.2732	1.26501e-25	2.07647e-23			Cup000007g007190.1	Cup000003g003177.1	Cup000067g035924.1	Cup000140g041501.1
Cup000022g019638.1	1.66676	1.55392e-22	1.77174e-20			Cup000013g013128.1	-2.2723	3.46444e-13	1.15934e-11			Cup000047g031524.1	Cup000077g036946.1	Cup000085g037850.1	Cup000016g015466.A
Cup000042g029767.1	1.66565	3.35937e-07	3.69318e-06			Cup000007g007829.1	-2.26957	1.98635e-14	7.91256e-13			Cup000025g021699.1	Cup000074g036641.1	Cup000251g043785.1	Cup000008g008549.1
Cup000060g034484.1	1.66315	1.7309e-22	1.95018e-20			Cup000038g027942.1	-2.26325	1.23629e-11	3.26494e-10			Cup000011g012006.1	Cup000026g022297.A	Cup000040g028899.1	Cup000019g018240.1
Cup000033g025979.1	1.66185	4.46966e-12	1.26141e-10			Cup000032g025185.1	-2.25502	1.34696e-15	6.3016e-14			Cup000038g027690.1	Cup000011g011226.1	Cup000051g032549.1	Cup000011g011477.1
Cup000008g008650.1	1.6601	1.53106e-13	5.37878e-12			Cup000008g008558.1	-2.24573	1.16735e-27	2.39006e-25			Cup000056g033820.A	Cup000049g032095.1	Cup000001g000969.1	Cup000013g013664.1
Cup000015g014969.1	1.65549	9.59168e-06	7.44234e-05			Cup000002g002447.1	-2.23298	3.89317e-09	6.46857e-08			Cup000342g044267.1	Cup000032g025347.1	Cup000021g019097.1	Cup000086g038026.1
Cup000046g031092.1	1.65518	1.38762e-08	2.06238e-07			Cup000003g003224.1	-2.22011	1.44748e-14	5.83928e-13			Cup000016g015957.1	Cup000046g031099.A	Cup000025g021695.1	Cup000028g023342.A
Cup000039g028210.1	1.64597	7.01789e-33	2.05581e-30			Cup000056g033822.1	-2.21883	1.47611e-09	2.62925e-08			Cup000011g011412.1	Cup000013g013158.1	Cup000038g027972.1	Cup000024g020836.1
Cup000001g001181.A	1.64427	7.30964e-07	7.47893e-06			Cup000007g007693.1	-2.21836	6.56148e-14	2.4192e-12			Cup000004g004015.A	Cup000019g018137.1	Cup000024g020728.1	Cup000057g034039.1
Cup000014g014182.1	1.6401	2.25469e-20	1.94261e-18			Cup000008g008074.1	-2.21552	2.28551e-18	1.61179e-16			Cup000047g031532.1	Cup000008g008628.1	Cup000028g023166.1	Cup000096g039080.1
Cup000011g011302.1	1.63843	8.95832e-18	5.84162e-16			Cup000032g025373.A	-2.21039	7.22847e-15	3.06542e-13			Cup000016g015559.1	Cup000008g008535.1	Cup000013g013079.1	Cup000006g006270.1
Cup000028g022904.1	1.63533	3.8251e-24	5.16551e-22			Cup000026g022257.1	-2.20695	5.48011e-12	1.52109e-10			Cup000028g023010.1	Cup000024g021086.1	Cup000031g024794.A	Cup000001g001153.A
Cup000026g022031.1	1.63378	1.14458e-36	4.44776e-34			Cup000067g035919.1	-2.2046	4.56344e-09	7.49719e-08			Cup000007g007750.1	Cup000024g020752.1	Cup000047g031432.1	Cup000008g008076.1
Cup000017g016267.1	1.63367	6.24271e-10	1.21046e-08			Cup000018g017193.1	-2.19967	9.29434e-10	1.73503e-08			Cup000013g012986.1	Cup000032g025331.1	Cup000003g002801.1	Cup000028g022882.1
Cup000342g044267.1	1.63308	1.28257e-08	1.91992e-07			Cup000003g003232.1	-2.1853	5.29954e-13	1.72493e-11			Cup000020g018433.1	Cup000032g025148.1	Cup000021g019467.1	Cup000066g035550.1
Cup000013g013894.1	1.63289	2.50733e-07	2.81997e-06			Cup000024g020819.1	-2.18495	4.09814e-26	7.15896e-24			Cup000033g026033.1	Cup000025g021648.1	Cup000040g028517.1	Cup000003g003385.1
Cup000032g025384.1	1.632	1.20649e-05	9.07656e-05			Cup000010g010323.A	-2.18428	9.54786e-09	1.46732e-07			Cup000043g030049.1	Cup000072g036466.1	Cup000003g002888.1	Cup000004g003997.1
Cup000014g014219.1	1.63102	1.80901e-14	7.22126e-13			Cup000069g036138.1	-2.1767	4.74769e-12	1.32552e-10			Cup000003g002932.1	Cup000001g000443.1	Cup000013g013078.1	Cup000024g020753.1
Cup000015g015314.A	1.63029	1.02708e-08	1.57207e-07			Cup000028g023124.A	-2.16207	7.19585e-26	1.21253e-23			Cup000108g040161.1	Cup000015g014983.1	Cup000028g023242.1	Cup000035g026677.1
Cup000077g037054.1	1.62595	2.85112e-45	1.64509e-42			Cup000042g029517.1	-2.15704	7.39601e-25	1.08329e-22			Cup000046g031092.1	Cup000038g027942.1	Cup000017g016315.1	Cup000061g034628.1
Cup000097g039135.1	1.62475	9.72446e-08	1.21339e-06			Cup000003g002746.1	-2.15255	1.04526e-12	3.25741e-11			Cup000012g012615.1	Cup000014g014526.1	Cup000008g008718.1	Cup000006g006647.A
Cup000011g011834.1	1.62067	5.14389e-32	1.3795e-29			Cup000055g033465.1	-2.14432	1.02224e-29	2.52784e-27			Cup000021g019464.1	Cup000032g025306.A	Cup000014g014649.1	Cup000015g015263.1
Cup000004g003771.1	1.61955	3.63928e-09	6.07323e-08			Cup000012g012830.1	-2.14187	2.87694e-16	1.50082e-14			Cup000008g008193.1	Cup000051g032634.1	Cup000068g036038.1	Cup000029g023478.1
Cup000019g018349.1	1.61919	4.57841e-05	0.000299418			Cup000032g025328.A	-2.14062	5.47802e-50	3.86322e-47			Cup000012g012654.1	Cup000023g020317.1	Cup000016g015471.1	Cup000004g003782.1
Cup000051g032663.1	1.61853	3.37904e-07	3.71266e-06			Cup000032g025138.A	-2.1317	3.16281e-16	1.6365e-14			Cup000054g033267.1	Cup000018g017118.1	Cup000042g029482.1	Cup000032g025406.1
Cup000001g001230.A	1.60823	0.000165737	0.00092383			Cup000173g042775.1	-2.12261	1.29699e-09	2.33864e-08			Cup000004g003866.1	Cup000032g025147.1	Cup000036g027187.1	Cup000003g003095.1
Cup000031g024804.1	1.60546	3.0769e-06	2.70736e-05			Cup000032g025306.A	-2.11958	5.52831e-14	2.07214e-12			Cup000143g041618.1	Cup000094g038883.A	Cup000008g008153.1	Cup000022g019646.1
Cup000011g011539.A	1.60001	2.1818e-08	3.14487e-07			Cup000003g002600.1	-2.10598	8.23384e-22	8.47463e-20			Cup000011g011908.1	Cup000051g032616.1	Cup000032g025393.1	Cup000006g006646.A
Cup000021g019191.1	1.5992	1.23708e-05	9.26644e-05			Cup000013g013537.1	-2.10219	1.06357e-16	5.97386e-15			Cup000083g037550.1	Cup002347g046175.1	Cup000045g030852.1	Cup000052g032798.1
Cup000002g001764.1	1.59675	2.19497e-17	1.34387e-15			Cup000014g014216.A	-2.09638	9.07706e-10	1.6978e-08			Cup000013g013612.1	Cup000003g002598.1	Cup000013g013198.1	Cup000004g003694.1
Cup000022g019754.1	1.59619	0.000129607	0.000744226			Cup000023g020244.1	-2.08437	9.73642e-08	1.21409e-06			Cup000042g029767.1	Cup000044g030243.1	Cup000171g042708.A	Cup000001g000155.1
Cup000063g035048.1	1.59561	4.8289e-18	3.23757e-16			Cup000022g020057.1	-2.07979	1.06159e-09	1.9568e-08			Cup000032g025416.1	Cup000083g037426.1	Cup000028g023136.1	Cup000032g025348.1
Cup000041g029071.1	1.59237	2.18931e-26	3.97016e-24			Cup000065g035474.1	-2.07836	3.31488e-07	3.65193e-06			Cup000018g017088.A	Cup000022g020110.1	Cup000005g004932.1	Cup000032g025327.1
Cup000010g010395.1	1.59032	3.19271e-26	5.68153e-24			Cup000160g042303.1	-2.07742	1.35758e-12	4.14258e-11			Cup000006g006144.1	Cup000247g043748.1	Cup000020g018516.1	Cup000033g026135.A
Cup000009g009834.1	1.58832	8.78852e-13	2.77516e-11			Cup000032g025347.1	-2.07572	1.84083e-08	2.67771e-07			Cup000025g021749.1	Cup000014g014121.1	Cup000001g000382.1	Cup000017g016334.1
Cup000074g036647.1	1.58432	1.4931e-09	2.65702e-08			Cup000013g013724.1	-2.07304	2.19113e-14	8.69194e-13			Cup000090g038265.1	Cup000209g043453.1	Cup000048g031881.1	Cup000006g006763.1
Cup000175g042840.1	1.58322	1.39997e-17	8.85608e-16			Cup000013g013810.1	-2.05922	1.27364e-23	1.62761e-21			Cup000019g018349.1	Cup000018g017052.1	Cup000048g031921.1	Cup000013g013828.1
Cup000098g039317.1	1.58222	1.15871e-15	5.47469e-14			Cup000014g014658.1	-2.05845	6.39874e-09	1.02213e-07			Cup000082g037411.A	Cup000046g031038.1	Cup000018g017559.1	Cup000014g014356.1
Cup000004g004663.A	1.58007	2.11723e-06	1.94098e-05			Cup000197g043300.A	-2.0494	7.45234e-07	7.59636e-06			Cup000097g039202.A	Cup000022g020057.1	Cup000045g030887.1	Cup000013g013515.A
Cup000014g014255.1	1.57698	2.68907e-10	5.58979e-09			Cup000026g021941.1	-2.04673	2.0017e-20	1.75051e-18			Cup000001g001230.A	Cup000008g008411.1	Cup000011g011373.1	Cup000024g020681.1
Cup000067g035924.1	1.57325	5.22246e-16	2.65176e-14			Cup000009g009082.1	-2.03579	2.48979e-13	8.52663e-12			Cup000422g044515.1	Cup000919g045377.1	Cup000018g017067.1	Cup000020g018799.1
Cup000085g037850.1	1.57018	2.2954e-24	3.16716e-22			Cup000033g025638.A	-2.03282	3.04654e-10	6.29849e-09			Cup000007g007244.1	Cup000032g025450.1	Cup000062g035022.A	Cup000043g030043.1
Cup000251g043785.1	1.5644	6.96516e-07	7.14952e-06			Cup000196g043275.1	-2.03242	1.1549e-09	2.11447e-08			Cup000017g016594.1	Cup000017g016343.1	Cup000013g013045.1	Cup000043g030009.1
Cup000040g028899.1	1.56415	3.47685e-09	5.84313e-08			Cup000128g040992.1	-2.02568	1.69239e-10	3.66191e-09			Cup000014g014449.A	Cup000038g027922.1	Cup000024g020757.1	Cup000051g032626.1
Cup000051g032549.1	1.55918	2.61718e-05	0.000181742			Cup000039g028226.1	-2.02511	6.3002e-08	8.23916e-07			Cup000044g030175.1	Cup000051g032617.1	Cup000021g019516.A	Cup000026g022397.A
Cup000001g000969.1	1.5588	1.37065e-16	7.54292e-15			Cup000107g039991.1	-2.02159	9.35474e-09	1.4388e-07			Cup001195g045603.1	Cup000111g040256.1	Cup000004g003812.1	Cup000007g007038.1
Cup000021g019097.1	1.55525	3.91197e-24	5.24562e-22			Cup000029g023659.1	-2.0186	1.16487e-06	1.14273e-05				Cup000024g021210.1	Cup000065g035479.1	Cup000003g003212.1
Cup000025g021695.1	1.55509	5.95596e-09	9.55412e-08			Cup000022g019643.1	-2.01815	9.48079e-21	8.6375e-19				Cup000010g010444.1	Cup000066g035569.1	Cup000002g001684.1
Cup000038g027972.1	1.54902	9.37386e-10	1.74475e-08			Cup000149g041920.1	-2.01714	3.20992e-07	3.54525e-06				Cup000182g042991.1	Cup000009g009236.1	Cup000001g001146.1
Cup000024g020728.1	1.54863	4.5915e-22	4.93936e-20			Cup000008g008535.1	-2.01675	2.65143e-09	4.5401e-08				Cup000032g025330.1	Cup000006g006660.1	Cup000083g037561.1
Cup000028g023166.1	1.54849	0.000114739	0.000667052			Cup000003g002665.1	-2.01499	5.67211e-26	9.72996e-24				Cup000097g039194.1	Cup000004g004302.1	Cup000006g006768.1
Cup000013g013079.1	1.54831	2.77361e-17	1.66601e-15			Cup000016g015406.1	-2.01167	1.71972e-07	2.01758e-06				Cup000008g008560.1	Cup000060g034485.1	Cup000015g015269.1
Cup000031g024794.A	1.54486	9.95873e-05	0.000591282			Cup000044g030227.1	-2.01004	6.41853e-21	5.96172e-19				Cup000016g015392.A	Cup000067g035931.1	Cup000056g033878.1
Cup000047g031432.1	1.54429	4.62634e-22	4.94889e-20			Cup000023g020334.1	-2.00835	2.14419e-17	1.31702e-15				Cup000030g024097.A	Cup000043g030004.1	Cup000013g013133.1
Cup000004g004015.A	1.54302	0.000151639	0.000856781			Cup000004g003772.1	-2.00617	3.93095e-12	1.11715e-10				Cup000025g021690.1	Cup000011g011336.1	Cup000057g034024.1
Cup000003g002801.1	1.54251	1.1349e-11	3.00134e-10			Cup000013g013158.1	-2.00584	9.5565e-13	3.00273e-11				Cup000009g009069.1	Cup000002g001513.1	Cup000004g003849.1
Cup000021g019467.1	1.54175	2.63715e-06	2.36635e-05			Cup000042g029758.1	-1.99287	6.32937e-14	2.34015e-12				Cup000016g015449.1	Cup000180g042916.1	Cup000038g028009.1
Cup000040g028517.1	1.54067	2.79921e-05	0.000193325			Cup000006g006149.1	-1.99285	8.924e-22	9.13558e-20				Cup000020g019084.1	Cup000032g025102.1	Cup000032g025068.1
Cup000003g002888.1	1.53935	6.09861e-15	2.60367e-13			Cup000157g042210.1	-1.98772	3.32251e-18	2.29217e-16				Cup000033g025570.1	Cup000012g012337.A	Cup000024g021105.1
Cup000016g015957.1	1.53671	8.92746e-06	6.96898e-05			Cup000013g013132.1	-1.98385	3.68382e-11	8.8902e-10				Cup000796g045222.A	Cup000013g013095.1	Cup000017g016662.1
Cup000013g013078.1	1.53471	1.34123e-16	7.40243e-15			Cup000014g014666.1	-1.97976	5.02677e-18	3.35841e-16				Cup000049g032131.1	Cup000084g037640.1	Cup000041g029285.1
Cup000028g023242.1	1.53423	4.00736e-18	2.72515e-16			Cup000012g012389.A	-1.97501	4.6052e-17	2.6734e-15				Cup000002g001757.1	Cup000087g038084.1	Cup000004g004517.1
Cup000017g016315.1	1.53369	4.38858e-22	4.74789e-20			Cup000004g004409.1	-1.97045	4.68791e-36	1.6842e-33				Cup000013g013705.1	Cup000020g018845.1	Cup000019g017840.1
Cup000008g008718.1	1.52989	7.33275e-08	9.42761e-07			Cup000025g021685.1	-1.96252	5.50936e-12	1.52476e-10				Cup000008g008175.1	Cup000003g003299.1	Cup000008g008545.1
Cup000014g014649.1	1.52908	2.68533e-14	1.05643e-12			Cup000001g000096.1	-1.9584	4.78503e-08	6.4299e-07				Cup000105g039870.1	Cup000001g000413.1	Cup000016g015507.1
Cup000068g036038.1	1.52881	7.11656e-05	0.000440528			Cup000003g003136.1	-1.95645	8.08915e-08	1.02821e-06				Cup000039g028226.1	Cup000037g027460.1	Cup000003g002634.1
Cup000043g030049.1	1.52706	8.699e-05	0.000526502			Cup000107g040074.1	-1.95512	1.8195e-17	1.12484e-15				Cup000032g025198.1	Cup000101g039493.1	Cup000006g006561.1
Cup000016g015471.1	1.52599	5.15034e-17	2.98078e-15			Cup000032g025372.1	-1.95091	2.91551e-30	7.40189e-28				Cup000014g014589.A	Cup000004g004799.A	Cup000025g021429.1
Cup000042g029482.1	1.52246	5.50907e-12	1.52476e-10			Cup000032g025148.1	-1.94899	1.18748e-19	9.2289e-18				Cup000037g027283.A	Cup000016g015458.1	Cup000056g033764.1
Cup000036g027187.1	1.52013	1.67657e-16	8.99257e-15			Cup000046g031099.A	-1.94859	1.45435e-06	1.3979e-05				Cup000039g028381.1	Cup000045g030709.1	Cup000032g025128.1
Cup000028g023010.1	1.51967	1.11933e-08	1.69556e-07			Cup000005g005151.1	-1.94782	1.95666e-22	2.17876e-20				Cup002497g046241.1	Cup000051g032426.1	Cup000083g037475.1
Cup000008g008153.1	1.51961	3.58477e-21	3.44736e-19			Cup000016g015590.1	-1.93376	2.36007e-10	4.94368e-09				Cup000022g019804.1	Cup000043g029862.1	Cup000016g016040.1
Cup000003g003423.1	1.51895	3.09242e-07	3.4254e-06			Cup000017g016418.1	-1.92736	1.28085e-34	4.20494e-32				Cup000007g007264.1	Cup000051g032365.1	Cup000003g002685.1
Cup000032g025393.1	1.51872	1.15455e-23	1.49549e-21			Cup000032g025330.1	-1.92406	1.11687e-11	2.96603e-10				Cup000002g002035.1	Cup000025g021629.A	Cup000196g043273.1
Cup000045g030852.1	1.51859	8.25537e-36	2.85801e-33			Cup000008g008708.1	-1.92147	1.79402e-15	8.23131e-14				Cup000054g033426.1	Cup000007g007228.1	Cup000213g043514.A
Cup000013g013198.1	1.51729	4.35203e-27	8.45582e-25			Cup000002g002511.A	-1.91338	4.01354e-07	4.33476e-06				Cup000061g034771.1	Cup000007g007857.1	Cup000032g025368.A
Cup000171g042708.A	1.51621	2.11159e-19	1.5955e-17			Cup000003g002614.1	-1.90766	2.45703e-44	1.37601e-41				Cup000072g036494.1	Cup000001g000211.A	Cup000010g010333.1
Cup000120g040663.1	1.51612	5.6761e-05	0.000361225			Cup000003g002616.1	-1.89368	1.22302e-19	9.46646e-18				Cup000015g015045.1	Cup000009g009932.A	Cup000019g018177.1
Cup000007g007750.1	1.51484	2.36158e-06	2.13721e-05			Cup000015g014983.1	-1.8897	2.04208e-06	1.88343e-05				Cup000030g024358.1	Cup000018g017096.1	Cup000032g025140.1
Cup000015g015229.1	1.51441	6.90438e-05	0.000428368			Cup000083g037496.1	-1.88379	1.49538e-07	1.77405e-06				Cup000014g014614.1	Cup000017g016278.1	Cup000008g008696.1
Cup000012g012615.1	1.51308	6.01235e-06	4.90073e-05			Cup000009g009619.1	-1.88291	4.96162e-37	2.01009e-34				Cup000005g005185.1	Cup000046g031253.1	Cup000030g024089.1
Cup000028g023136.1	1.51228	2.58128e-05	0.000179708			Cup000050g032205.1	-1.87691	7.64941e-09	1.20076e-07				Cup000006g006362.1	Cup000021g019447.1	Cup000025g021614.A
Cup000012g012654.1	1.51143	0.000342071	0.00173922			Cup000162g042368.1	-1.86426	6.35936e-07	6.57019e-06				Cup000066g035783.1	Cup000084g037693.1	Cup000019g018214.1
Cup000005g004932.1	1.50691	6.97195e-09	1.10443e-07			Cup000044g030285.A	-1.85708	6.68998e-12	1.82498e-10				Cup000040g028877.1	Cup000022g019668.1	Cup000035g026881.1
Cup000020g018516.1	1.50624	1.60412e-09	2.8413e-08			Cup000025g021288.1	-1.8532	1.61262e-23	2.0335e-21				Cup000009g009717.1	Cup000015g015279.1	Cup000032g025336.1
Cup000001g000382.1	1.50577	4.85724e-07	5.15821e-06			Cup000024g020808.1	-1.85261	5.44154e-63	5.45328e-60				Cup000044g030455.1	Cup000014g014617.1	Cup000019g018096.1
Cup000048g031881.1	1.50441	2.37783e-11	5.93398e-10			Cup000209g043453.1	-1.85066	8.73994e-08	1.10283e-06				Cup000007g007728.1	Cup000005g005006.1	Cup000010g010424.1
Cup000048g031921.1	1.50011	6.61562e-33	1.96825e-30			Cup000028g023092.A	-1.84559	1.71031e-14	6.84159e-13				Cup000043g030012.A	Cup000058g034199.1	Cup000003g002619.1
Cup000018g017559.1	1.49843	5.24052e-11	1.23649e-09			Cup000005g004898.1	-1.84439	2.57475e-18	1.80242e-16				Cup000033g025668.1	Cup000211g043484.1	Cup000009g009071.1
Cup000006g006536.1	1.49747	3.77623e-05	0.00025238			Cup000014g014743.1	-1.84166	7.87075e-07	7.98438e-06				Cup000066g035605.1	Cup001287g045674.1	Cup000009g009280.1
Cup000045g030887.1	1.49702	2.60603e-17	1.57528e-15			Cup000004g004660.1	-1.84102	6.42836e-20	5.12144e-18				Cup000021g019165.1	Cup000009g009304.1	Cup000062g034924.1
Cup000011g011373.1	1.49617	1.78972e-13	6.196e-12			Cup000032g025137.1	-1.82913	3.07147e-17	1.82193e-15				Cup000031g024594.1	Cup000022g019956.1	Cup000039g028208.1
Cup000018g017067.1	1.49384	0.00016969	0.000941452			Cup000032g025207.1	-1.82668	1.75894e-29	4.08438e-27				Cup000009g009274.1	Cup000081g037350.1	Cup000005g005449.1
Cup000062g035022.A	1.49367	6.12137e-08	8.03287e-07			Cup000032g025350.1	-1.82113	3.09706e-32	8.54653e-30				Cup000033g025638.A	Cup000048g031675.1	Cup000051g032420.1
Cup000013g013045.1	1.49366	1.92822e-05	0.000138183			Cup000021g019403.1	-1.81946	6.92788e-23	8.14283e-21				Cup000173g042775.1	Cup000022g020236.1	Cup000024g020835.A
Cup000024g020757.1	1.49294	4.84132e-08	6.50096e-07			Cup000008g008071.1	-1.81425	2.40503e-08	3.43028e-07				Cup000032g025356.1	Cup000016g015489.1	Cup000213g043510.A
Cup000013g013039.1	1.48926	1.94826e-05	0.000139461			Cup000147g041855.1	-1.81357	1.91001e-12	5.69147e-11				Cup000003g003232.1	Cup000021g019472.1	Cup000044g030239.1
Cup000021g019516.A	1.48829	3.09202e-06	2.71941e-05			Cup000012g012713.1	-1.81067	9.34752e-07	9.33378e-06				Cup000024g020875.1	Cup000010g010360.1	Cup000008g008080.1
Cup000004g003812.1	1.48458	9.6481e-17	5.43519e-15			Cup000006g006959.A	-1.8057	2.31407e-11	5.79003e-10				Cup000010g010971.1	Cup000010g010468.1	Cup000025g021635.1
Cup000038g028030.1	1.48195	3.47074e-05	0.000234169			Cup000008g008054.1	-1.80316	4.36794e-06	3.68172e-05				Cup000128g040992.1	Cup000015g015075.1	Cup000017g016273.1
Cup000065g035479.1	1.47686	1.92087e-06	1.78691e-05			Cup000008g008567.A	-1.80291	4.51501e-06	3.79392e-05				Cup000052g032885.1	Cup000003g003336.1	Cup000024g021127.1
Cup000066g035569.1	1.47505	4.79992e-31	1.25199e-28			Cup000032g025307.1	-1.80196	6.61794e-22	6.962e-20				Cup000034g026437.A	Cup000140g041496.1	Cup000012g012295.1
Cup000009g009236.1	1.47454	2.93243e-13	9.90007e-12			Cup000105g039902.1	-1.80166	5.2807e-10	1.03981e-08				Cup000061g034769.1	Cup000002g001550.1	Cup000002g001755.1
Cup000006g006660.1	1.4735	9.92144e-09	1.5235e-07			Cup000049g031992.1	-1.79557	5.46784e-09	8.82077e-08				Cup000021g019159.1	Cup000003g003160.1	Cup000008g008126.1
Cup000004g004302.1	1.47142	3.13729e-14	1.22663e-12			Cup000014g014742.1	-1.79391	3.0141e-06	2.65947e-05				Cup000006g006785.1	Cup000020g018786.1	Cup000024g021185.A
Cup000047g031532.1	1.471	4.22899e-07	4.55197e-06			Cup000032g025177.1	-1.79312	4.01813e-16	2.0567e-14				Cup000011g011881.1	Cup000015g015277.1	Cup000001g000403.1
Cup000060g034485.1	1.4702	2.95384e-10	6.11348e-09			Cup000016g016206.1	-1.78536	1.09709e-08	1.66452e-07				Cup000004g003813.A	Cup000007g007234.1	Cup000020g018579.1
Cup000067g035931.1	1.46861	3.18247e-25	4.96699e-23			Cup000035g026788.1	-1.78334	1.35132e-06	1.30546e-05				Cup000010g010314.A	Cup000017g016872.1	Cup000003g002592.1
Cup000043g030004.1	1.46847	4.57208e-12	1.28592e-10			Cup000083g037508.1	-1.77843	2.40106e-09	4.1487e-08				Cup000003g003134.1	Cup000011g011839.A	Cup000168g042532.1
Cup000011g011336.1	1.4684	9.43893e-14	3.40391e-12			Cup000042g029722.1	-1.77585	1.048e-05	8.02691e-05				Cup000077g036995.1	Cup000055g033548.1	Cup000032g025195.A
Cup000002g001513.1	1.46549	2.67413e-18	1.86513e-16			Cup000018g017523.A	-1.77373	1.66305e-08	2.43776e-07				Cup000001g001147.1	Cup000011g011979.1	Cup000001g000192.1
Cup000049g032103.1	1.46351	0.000151109	0.000854043			Cup000028g022951.1	-1.77201	1.23291e-06	1.20142e-05				Cup000039g028304.A	Cup000134g041257.1	Cup000013g013641.1
Cup000009g009210.1	1.46175	0.000123626	0.000713537			Cup000049g032014.1	-1.77129	4.34271e-05	0.00028553				Cup000005g005133.1	Cup000009g009784.1	Cup000002g002193.1
Cup000180g042916.1	1.46049	9.73129e-27	1.8166e-24			Cup000024g020703.1	-1.76736	2.42691e-08	3.45697e-07				Cup000125g040868.1	Cup000043g030124.A	Cup000032g025131.1
Cup000032g025102.1	1.45893	7.30899e-18	4.81559e-16			Cup000008g008083.1	-1.75261	1.54775e-06	1.47649e-05				Cup000052g032745.1	Cup000007g007597.1	Cup000061g034768.1
Cup000012g012337.A	1.45601	2.65877e-08	3.74174e-07			Cup000011g012005.1	-1.75094	3.69101e-08	5.07075e-07				Cup000017g016661.1	Cup000072g036459.1	Cup000052g032747.1
Cup000013g013095.1	1.45473	8.88266e-16	4.28189e-14			Cup000002g002423.A	-1.74986	1.00439e-07	1.24916e-06				Cup000025g021668.1	Cup000186g043064.1	Cup000001g000337.1
Cup000084g037640.1	1.4509	5.46448e-35	1.82542e-32			Cup000024g020754.1	-1.74776	1.74317e-22	1.95245e-20				Cup000009g009684.1	Cup000066g035634.A	Cup000016g015606.1
Cup000087g038084.1	1.45009	3.1755e-07	3.51335e-06			Cup000006g006482.1	-1.74763	5.66928e-06	4.65497e-05				Cup000024g020764.A	Cup000002g002140.1	Cup000074g036764.1
Cup000020g018845.1	1.44815	2.56945e-16	1.35526e-14			Cup000012g012698.1	-1.74263	4.62015e-14	1.78082e-12				Cup000060g034501.1	Cup000081g037343.1	Cup000015g015057.1
Cup000003g003299.1	1.44282	1.10458e-14	4.55244e-13			Cup000039g028225.1	-1.74216	3.73221e-16	1.92068e-14				Cup000105g039902.1	Cup000004g004368.1	Cup000153g042059.1
Cup000001g000413.1	1.44024	7.39513e-22	7.65276e-20			Cup000098g039235.1	-1.74108	2.77403e-13	9.39863e-12				Cup000015g015264.1	Cup000075g036798.1	Cup000044g030282.1
Cup000037g027460.1	1.43823	1.56007e-05	0.00011456			Cup000003g002668.A	-1.73366	8.88399e-06	6.94417e-05				Cup000037g027473.1	Cup000002g001506.1	Cup000037g027489.1
Cup000101g039493.1	1.43588	6.80663e-07	7.00189e-06			Cup000008g008557.1	-1.73267	1.28484e-15	6.02576e-14				Cup000004g004594.1	Cup000002g002227.1	Cup000019g017854.1
Cup000004g004799.A	1.43585	6.31845e-06	5.13047e-05			Cup000140g041501.1	-1.72805	5.7592e-16	2.90878e-14				Cup000091g038459.1	Cup000035g026636.1	Cup000001g001014.1
Cup000016g015458.1	1.43296	2.12135e-16	1.13145e-14			Cup000032g025450.1	-1.72743	4.14465e-09	6.85651e-08				Cup000017g016340.1	Cup000051g032458.1	Cup000003g002662.1
Cup000045g030709.1	1.43145	3.53955e-13	1.18033e-11			Cup000168g042531.1	-1.71443	2.3349e-08	3.33775e-07				Cup000003g002681.1	Cup000006g006037.1	Cup000017g016293.1
Cup000051g032426.1	1.42952	3.57648e-23	4.36537e-21			Cup000004g004594.1	-1.70959	5.65581e-08	7.48383e-07				Cup000024g020703.1	Cup000009g009747.1	Cup000032g025359.1
Cup000043g029862.1	1.42886	4.84034e-05	0.000314986			Cup000016g015466.A	-1.7091	1.1435e-09	2.09561e-08				Cup000012g012697.1	Cup000018g017381.A	Cup000032g025345.1
Cup000051g032365.1	1.42847	5.25735e-20	4.29636e-18			Cup000033g025973.1	-1.70814	1.63696e-06	1.55342e-05				Cup000044g030277.1	Cup000002g001722.A	Cup000049g031996.A
Cup000025g021629.A	1.42359	9.24244e-16	4.42174e-14			Cup000412g044482.1	-1.70466	5.42441e-05	0.000348554				Cup000052g032876.1	Cup000013g013315.1	Cup000008g008802.1
Cup000007g007228.1	1.4232	1.15262e-22	1.33012e-20			Cup000008g008549.1	-1.70281	5.26835e-15	2.27988e-13				Cup000009g009640.1	Cup000027g022504.1	Cup000066g035745.1
Cup000056g033820.A	1.42124	2.22571e-07	2.54381e-06			Cup000019g018240.1	-1.69569	5.69408e-11	1.33195e-09				Cup000021g019441.1	Cup000712g045108.1	Cup000012g012779.1
Cup000016g015559.1	1.41683	3.47615e-06	3.01134e-05			Cup000011g011477.1	-1.69425	1.58704e-16	8.60933e-15				Cup000010g010372.A	Cup000009g009225.1	Cup000193g043186.1
Cup000007g007857.1	1.4165	4.16807e-08	5.68105e-07			Cup000013g013664.1	-1.68782	1.36155e-21	1.37171e-19				Cup000003g003418.1	Cup000015g015147.1	Cup000004g003971.1
Cup000001g000211.A	1.4122	6.03283e-05	0.000381632			Cup000016g015392.A	-1.68704	1.60407e-05	0.000117474				Cup000006g006209.1	Cup000969g045440.A	Cup000117g040502.1
Cup000009g009932.A	1.41108	7.75105e-33	2.23618e-30			Cup000086g038026.1	-1.68675	7.80375e-16	3.81982e-14				Cup000003g002746.1	Cup000028g022880.1	Cup000009g009029.1
Cup000018g017096.1	1.4103	1.46937e-05	0.000108653			Cup000028g023342.A	-1.68371	5.61801e-14	2.10162e-12				Cup000032g025389.1	Cup000017g016907.A	Cup000089g038236.1
Cup000017g016278.1	1.40993	7.90118e-20	6.21679e-18			Cup000024g020836.1	-1.68307	1.52343e-38	7.25192e-36				Cup000016g015995.1	Cup000005g005161.1	Cup000024g021081.1
Cup000046g031253.1	1.4094	2.39268e-12	6.98758e-11			Cup000057g034039.1	-1.68283	1.18809e-07	1.44275e-06				Cup000009g009045.1	Cup000142g041580.1	Cup000011g011480.1
Cup000021g019447.1	1.40713	6.15127e-10	1.19517e-08			Cup000096g039080.1	-1.67589	1.45515e-17	9.08446e-16				Cup000003g003183.1	Cup000175g042813.1	Cup000038g027975.1
Cup000024g020751.1	1.40702	5.10215e-05	0.000330218			Cup000006g006270.1	-1.67188	5.00293e-14	1.90141e-12				Cup000029g023514.1	Cup000026g022369.1	Cup000040g028770.1
Cup000084g037693.1	1.40687	2.73464e-06	2.44576e-05			Cup000001g001153.A	-1.66785	6.33538e-20	5.06974e-18				Cup000061g034647.1	Cup000020g018832.1	Cup000044g030385.1
Cup000022g019668.1	1.40622	3.97154e-18	2.71047e-16			Cup000008g008076.1	-1.66309	1.55365e-11	4.03039e-10				Cup000013g013518.A	Cup000006g006297.1	Cup000005g005096.1
Cup000015g015279.1	1.4028	6.2834e-21	5.86482e-19			Cup000028g022882.1	-1.66195	3.85086e-10	7.78389e-09				Cup000018g017167.1	Cup000066g035612.1	Cup000021g019439.1
Cup000014g014617.1	1.40266	3.91261e-12	1.1136e-10			Cup000066g035550.1	-1.65954	5.5476e-05	0.000354946				Cup000048g031849.1	Cup000015g015261.A	Cup000038g028076.1
Cup000005g005006.1	1.40225	2.59796e-14	1.0263e-12			Cup000080g037214.1	-1.65749	1.17443e-05	8.85986e-05				Cup000010g010882.1	Cup000002g002218.1	Cup000020g018800.A
Cup000058g034199.1	1.40168	2.1071e-07	2.4184e-06			Cup000003g003385.1	-1.6568	2.54711e-08	3.60859e-07				Cup000065g035358.A	Cup000006g006552.1	Cup000028g023129.A
Cup000211g043484.1	1.3992	1.08502e-11	2.88544e-10			Cup000003g003177.1	-1.65259	8.92499e-06	6.96898e-05				Cup000003g003128.1	Cup000003g003190.1	Cup000035g026847.1
Cup001287g045674.1	1.39802	1.75563e-05	0.000127397			Cup000003g002598.1	-1.64911	8.24441e-05	0.000502342				Cup000055g033553.1	Cup000031g024649.1	Cup000004g004113.1
Cup000007g007190.1	1.39717	8.93129e-09	1.38373e-07			Cup000029g023474.1	-1.64675	5.07445e-09	8.24425e-08				Cup000002g001594.1	Cup000002g001522.1	Cup000001g000912.1
Cup000009g009304.1	1.3968	7.80311e-10	1.47987e-08			Cup000004g003997.1	-1.6467	2.19336e-06	2.0021e-05				Cup000007g007753.1	Cup000021g019501.A	Cup000002g001588.1
Cup000022g019956.1	1.3956	5.92299e-08	7.78865e-07			Cup000060g034501.1	-1.64189	6.06755e-07	6.2926e-06				Cup000032g025170.A	Cup000031g024687.1	Cup000032g025437.1
Cup000081g037350.1	1.39442	4.43999e-17	2.58538e-15			Cup000024g020753.1	-1.63609	1.25322e-23	1.61234e-21				Cup000060g034346.1	Cup000022g020052.1	Cup000086g037948.A
Cup000048g031675.1	1.39422	2.01246e-06	1.86196e-05			Cup000035g026677.1	-1.63268	2.4152e-09	4.16934e-08				Cup000012g012227.1	Cup000158g042229.1	Cup000060g034430.1
Cup000022g020236.1	1.3926	4.49712e-08	6.08166e-07			Cup000033g025966.1	-1.63237	1.17622e-05	8.86984e-05				Cup000117g040505.1	Cup000001g000430.1	Cup000024g020821.1
Cup000016g015489.1	1.39253	3.93608e-22	4.3322e-20			Cup000061g034628.1	-1.63014	2.29184e-06	2.07804e-05				Cup000042g029749.1	Cup000029g023607.A	Cup000085g037804.1
Cup000021g019472.1	1.39213	1.90599e-12	5.6884e-11			Cup000006g006647.A	-1.62934	1.34767e-25	2.19325e-23				Cup000133g041202.1	Cup000041g029033.1	Cup000014g014113.1
Cup000010g010360.1	1.39063	1.2964e-08	1.93758e-07			Cup000015g015263.1	-1.62896	6.78128e-08	8.80179e-07				Cup000014g014116.1	Cup000098g039297.1	Cup000042g029708.1
Cup000010g010468.1	1.3891	1.67497e-11	4.29827e-10			Cup000029g023478.1	-1.62799	4.61407e-12	1.29391e-10				Cup000026g022236.1	Cup000011g011875.A	Cup000047g031564.1
Cup000015g015075.1	1.38169	7.94266e-05	0.000485978			Cup000004g003782.1	-1.62559	5.77856e-08	7.62506e-07				Cup000049g031992.1	Cup000012g012381.A	Cup000037g027282.1
Cup000003g003336.1	1.38161	1.22074e-08	1.83457e-07			Cup000032g025406.1	-1.62434	7.84876e-08	1.00166e-06				Cup000044g030152.1	Cup000007g007783.1	Cup000012g012434.A
Cup000003g003260.1	1.3807	0.000113928	0.000663397			Cup000003g003095.1	-1.62032	4.15184e-06	3.52139e-05				Cup000032g025146.1	Cup000019g017763.1	Cup000019g017788.1
Cup000140g041496.1	1.3795	4.92616e-22	5.24017e-20			Cup000022g019646.1	-1.61968	1.6533e-05	0.000120615				Cup000066g035578.A	Cup000075g036836.A	Cup000005g005529.1
Cup000030g024255.1	1.37908	8.87184e-05	0.000535596			Cup000006g006646.A	-1.61853	3.60697e-15	1.59351e-13				Cup000022g019683.1	Cup000005g005717.1	Cup000040g028798.1
Cup000002g001550.1	1.37688	1.26395e-09	2.28556e-08			Cup000014g014614.1	-1.61534	9.70045e-06	7.51307e-05				Cup000029g023720.1	Cup000092g038495.1	Cup000026g022348.1
Cup000003g003160.1	1.37629	7.33581e-06	5.87142e-05			Cup000032g025198.1	-1.61502	4.37762e-08	5.94114e-07				Cup000002g002511.A	Cup000016g015890.1	Cup000058g034143.1
Cup000020g018786.1	1.37626	2.37784e-24	3.25729e-22			Cup000052g032798.1	-1.61485	1.52501e-20	1.36328e-18				Cup000006g006774.1	Cup000017g016491.1	Cup000009g009906.1
Cup000029g023396.1	1.37594	8.64584e-06	6.78029e-05			Cup000004g003694.1	-1.61471	5.97387e-07	6.20779e-06				Cup000032g025439.1	Cup000092g038520.1	Cup000032g025436.1
Cup000015g015277.1	1.37519	5.14286e-10	1.01688e-08			Cup000052g032908.1	-1.61282	5.65851e-05	0.000360551				Cup000026g022293.1	Cup000112g040312.1	Cup000043g030022.1
Cup000143g041618.1	1.36986	0.000280117	0.00146692			Cup000001g000155.1	-1.60798	5.80149e-14	2.16176e-12				Cup000162g042368.1	Cup000009g009260.1	Cup000092g038616.1
Cup000007g007234.1	1.36966	7.71839e-16	3.79757e-14			Cup000032g025348.1	-1.6073	2.49634e-16	1.32099e-14				Cup000016g015875.1	Cup000089g038234.1	Cup000024g020774.1
Cup000016g015560.1	1.36932	7.18158e-05	0.000443975			Cup000032g025356.1	-1.60457	3.93825e-10	7.95209e-09				Cup000142g041572.1	Cup000013g013250.1	Cup000058g034158.A
Cup000017g016872.1	1.36901	1.59052e-31	4.20626e-29			Cup000032g025327.1	-1.60394	3.2045e-10	6.60355e-09				Cup000008g008074.1	Cup000074g036761.1	Cup000027g022532.1
Cup000011g011839.A	1.36726	0.000368439	0.00184909			Cup000033g026135.A	-1.60292	2.72491e-08	3.82633e-07				Cup000041g029211.1	Cup000044g030440.1	Cup000037g027467.1
Cup000055g033548.1	1.36365	2.9568e-13	9.96467e-12			Cup000017g016334.1	-1.59937	1.98631e-11	5.02275e-10				Cup000013g013132.1	Cup000008g008278.1	Cup000060g034400.1
Cup000011g011979.1	1.36337	1.01416e-18	7.39868e-17			Cup000066g035578.A	-1.59902	9.24891e-10	1.72825e-08				Cup000010g010713.1	Cup000048g031619.A	Cup000015g015240.1
Cup000134g041257.1	1.36337	1.45722e-19	1.10988e-17			Cup000006g006763.1	-1.59713	8.20902e-09	1.28121e-07				Cup000016g016005.1	Cup000046g031026.1	Cup000010g010909.1
Cup000008g008292.1	1.36321	2.50278e-05	0.000175075			Cup000013g013828.1	-1.59677	6.15311e-12	1.69064e-10				Cup000016g015590.1	Cup000016g015847.1	Cup000065g035448.1
Cup000009g009784.1	1.36179	1.59203e-15	7.35771e-14			Cup000014g014356.1	-1.59674	4.60515e-13	1.51184e-11				Cup000003g002852.1	Cup000024g020990.1	Cup000040g028708.1
Cup000043g030124.A	1.36163	4.09597e-13	1.35402e-11			Cup000038g028052.1	-1.59464	9.22931e-11	2.08217e-09				Cup000003g003138.1	Cup000004g004655.1	Cup000004g004585.1
Cup000007g007597.1	1.35915	5.91916e-05	0.000375064			Cup000013g013515.A	-1.59248	4.37807e-14	1.69436e-12				Cup000004g004336.1	Cup000022g019997.1	Cup000004g004637.1
Cup000072g036459.1	1.35863	4.74055e-09	7.76138e-08			Cup000024g020681.1	-1.59105	7.27478e-11	1.6669e-09				Cup000013g013707.1	Cup000010g010825.1	Cup000003g003226.1
Cup000186g043064.1	1.35832	5.28759e-28	1.10639e-25			Cup000020g018799.1	-1.58827	5.01979e-14	1.90402e-12				Cup000029g023474.1	Cup000043g029893.1	Cup000073g036584.1
Cup000066g035634.A	1.35794	8.92884e-07	8.97645e-06			Cup000043g030043.1	-1.58693	7.50565e-11	1.71696e-09				Cup000070g036250.1	Cup000038g027746.A	Cup000008g008345.1
Cup000002g002140.1	1.35778	3.41712e-11	8.30977e-10			Cup000172g042728.1	-1.58594	1.14723e-08	1.73506e-07				Cup000055g033487.1	Cup000002g002099.1	Cup000058g034090.1
Cup000081g037343.1	1.35766	3.1491e-26	5.65679e-24			Cup000050g032226.1	-1.58403	5.19184e-05	0.000335453				Cup000010g010297.1	Cup000009g009587.1	Cup000003g002637.1
Cup000013g012986.1	1.35716	6.01698e-06	4.90241e-05			Cup000041g029211.1	-1.58079	9.20534e-08	1.15543e-06				Cup000438g044566.1	Cup000013g013038.1	Cup000013g013882.1
Cup000004g004368.1	1.3566	3.62211e-25	5.56198e-23			Cup000043g030009.1	-1.57868	1.23021e-09	2.23303e-08				Cup000011g011930.1	Cup000055g033563.A	Cup000039g028266.1
Cup000075g036798.1	1.35298	7.09886e-14	2.59442e-12			Cup000051g032626.1	-1.57758	2.33738e-12	6.83658e-11				Cup000018g017552.1	Cup000104g039818.1	Cup000017g016416.1
Cup000032g025383.1	1.34916	0.000100757	0.000597668			Cup000026g022397.A	-1.57428	6.74346e-07	6.9443e-06				Cup000016g015819.1	Cup000003g002731.1	Cup000018g017277.1
Cup000001g001122.1	1.34847	0.000168888	0.000938333			Cup000008g008843.1	-1.57427	6.82969e-05	0.000424287				Cup000004g003828.1	Cup000010g010770.1	Cup000065g035460.1
Cup000002g001506.1	1.3457	3.82967e-08	5.24988e-07			Cup000007g007038.1	-1.57342	3.93983e-12	1.11801e-10				Cup000091g038416.1	Cup000045g030622.1	Cup000051g032627.1
Cup000002g002227.1	1.34425	6.21559e-12	1.70535e-10			Cup000001g000896.1	-1.57256	1.78105e-10	3.8363e-09				Cup000008g008082.1	Cup000009g009013.1	Cup000021g019418.1
Cup000035g026636.1	1.34156	5.45293e-08	7.24053e-07			Cup000125g040868.1	-1.57198	4.56973e-08	6.1667e-07				Cup000031g024827.1	Cup000002g002262.1	Cup000044g030225.1
Cup000051g032458.1	1.34099	5.63651e-26	9.72996e-24			Cup000003g003212.1	-1.57115	2.2649e-37	9.37522e-35				Cup000026g021941.1	Cup000031g024972.1	Cup000026g022353.1
Cup000006g006037.1	1.34081	3.02827e-08	4.21809e-07			Cup000002g001684.1	-1.56367	8.15813e-12	2.19096e-10				Cup000069g036102.1	Cup000011g011468.1	Cup000008g008313.1
Cup000009g009747.1	1.33818	2.05758e-08	2.97718e-07			Cup000001g001146.1	-1.56301	3.3756e-20	2.83149e-18				Cup000028g023017.1	Cup000002g001744.1	Cup000001g000522.1
Cup000018g017381.A	1.33793	2.02649e-07	2.33857e-06			Cup000083g037561.1	-1.5619	0.000169179	0.000939439				Cup000003g003286.1	Cup000086g037892.1	Cup000003g003215.1
Cup000002g001722.A	1.3368	1.18884e-06	1.16324e-05			Cup000172g042718.A	-1.56065	1.29427e-09	2.33594e-08				Cup000001g000783.1	Cup000048g031800.1	Cup000042g029738.1
Cup000013g013315.1	1.33652	1.88728e-11	4.79144e-10			Cup000006g006768.1	-1.55835	2.12182e-10	4.48905e-09				Cup000168g042522.A	Cup000045g030652.1	Cup000180g042926.1
Cup000027g022504.1	1.33354	5.2451e-21	4.96875e-19			Cup000032g025100.1	-1.55677	1.80537e-12	5.39656e-11				Cup000007g007823.1	Cup000001g000153.1	Cup000009g009696.A
Cup000712g045108.1	1.33308	6.02126e-12	1.65723e-10			Cup000015g015269.1	-1.54598	3.80015e-06	3.2594e-05				Cup000063g035045.1	Cup000014g014149.1	Cup000024g020655.1
Cup000009g009225.1	1.33211	2.07241e-06	1.9054e-05			Cup000039g028381.1	-1.54505	2.23858e-06	2.03752e-05				Cup000007g008030.1	Cup000008g008681.1	Cup000008g008600.1
Cup000015g015147.1	1.33201	5.29711e-20	4.31035e-18			Cup000077g036946.1	-1.54363	5.3836e-06	4.4434e-05				Cup000011g012005.1	Cup000043g029984.A	Cup000018g017262.1
Cup000969g045440.A	1.33052	1.18443e-07	1.43952e-06			Cup000056g033878.1	-1.54348	8.31933e-11	1.88806e-09				Cup000012g012711.1	Cup000101g039478.1	Cup000011g011337.1
Cup000028g022880.1	1.33035	6.45598e-11	1.49366e-09			Cup000013g013133.1	-1.53856	1.93825e-09	3.39524e-08				Cup000020g018577.1	Cup000027g022691.1	Cup000024g020807.1
Cup000017g016907.A	1.32993	1.6821e-05	0.000122552			Cup000057g034024.1	-1.53385	1.62874e-06	1.54754e-05				Cup000032g025100.1	Cup000052g032818.1	Cup000097g039159.A
Cup000005g005161.1	1.32806	4.34637e-21	4.13797e-19			Cup000004g003849.1	-1.53363	8.06585e-13	2.56431e-11				Cup000003g002593.1	Cup000108g040179.1	Cup000009g010097.A
Cup000142g041580.1	1.32786	2.97124e-18	2.06479e-16			Cup000038g028009.1	-1.53007	1.06363e-15	5.05051e-14				Cup000062g034958.1	Cup000014g014165.1	Cup003989g046599.1
Cup000175g042813.1	1.32698	1.78531e-06	1.67789e-05			Cup000032g025068.1	-1.52788	1.44025e-17	9.04329e-16				Cup000150g041978.1	Cup002808g046365.1	Cup000007g007293.1
Cup000108g040161.1	1.32683	2.00072e-06	1.8538e-05			Cup000001g000783.1	-1.52536	8.63028e-08	1.09116e-06				Cup000038g028052.1	Cup000019g017885.1	Cup000033g025875.1
Cup000026g022369.1	1.32643	3.33602e-07	3.66963e-06			Cup000024g021105.1	-1.52412	3.60182e-26	6.3502e-24				Cup000010g010323.A	Cup000017g016378.1	Cup000016g016039.1
Cup000020g018832.1	1.32464	4.97622e-07	5.2728e-06			Cup000017g016662.1	-1.51804	4.96595e-12	1.38241e-10				Cup000172g042718.A	Cup000041g029294.1	Cup000032g025341.1
Cup000006g006297.1	1.32232	8.47168e-18	5.56239e-16			Cup000041g029285.1	-1.51099	1.43254e-37	6.06156e-35				Cup000024g021133.1	Cup000009g009629.1	Cup000011g011705.1
Cup000066g035612.1	1.32167	0.000154823	0.000872443			Cup000003g002615.A	-1.50776	6.85152e-09	1.08901e-07				Cup000013g013680.1	Cup000051g032425.A	Cup000027g022578.1
Cup000015g015261.A	1.32136	3.28104e-21	3.18747e-19			Cup000004g004517.1	-1.50637	7.46424e-16	3.6916e-14				Cup000021g019117.1	Cup000013g013793.1	Cup000028g023239.1
Cup000002g002218.1	1.31985	8.75895e-26	1.46297e-23			Cup000019g017840.1	-1.50616	1.02199e-22	1.18657e-20				Cup000033g025685.1	Cup000049g032097.1	Cup000023g020262.1
Cup000006g006552.1	1.31964	0.000531634	0.00253705			Cup000027g022760.1	-1.50613	2.78027e-05	0.000192157				Cup000011g011379.A	Cup000031g024898.1	Cup000044g030281.1
Cup000003g003190.1	1.31928	3.22195e-17	1.90525e-15			Cup000008g008545.1	-1.50519	1.19076e-12	3.66882e-11				Cup000011g011804.1	Cup000021g019491.1	Cup000005g005732.1
Cup000031g024649.1	1.31729	1.42814e-26	2.64011e-24			Cup000003g003183.1	-1.50481	3.61865e-09	6.0494e-08				Cup000030g024326.1	Cup000044g030211.1	Cup000009g009819.1
Cup000002g001522.1	1.3165	9.64137e-14	3.47035e-12			Cup000016g015507.1	-1.50033	0.000493663	0.00238635				Cup000007g007693.1	Cup000003g002585.1	Cup000013g013652.1
Cup000021g019501.A	1.31493	0.000280701	0.00146917			Cup000003g002634.1	-1.50015	6.70785e-27	1.2646e-24				Cup000023g020447.1	Cup000002g001527.1	Cup000048g031624.A
Cup000031g024687.1	1.31369	4.7394e-05	0.000308734			Cup000006g006561.1	-1.48994	1.73675e-05	0.000126267				Cup000004g003690.1	Cup000013g013249.1	Cup000061g034663.1
Cup000022g020052.1	1.31002	7.15704e-11	1.64586e-09			Cup000025g021429.1	-1.48759	6.56861e-14	2.4192e-12				Cup000025g021637.1	Cup000005g005466.1	Cup000017g016677.1
Cup000158g042229.1	1.30577	2.83582e-16	1.48343e-14			Cup000083g037532.1	-1.48575	0.000564986	0.00267343				Cup000001g000896.1	Cup000051g032434.1	Cup000069g036089.1
Cup000001g000430.1	1.30512	1.93656e-05	0.000138728			Cup000030g024097.A	-1.48419	6.51563e-05	0.000407034				Cup000060g034374.1	Cup000052g032946.1	Cup000019g017752.A
Cup000029g023607.A	1.30496	0.000727467	0.00332574			Cup000056g033764.1	-1.48297	1.73941e-08	2.53988e-07				Cup000006g006320.A	Cup000047g031450.1	Cup000066g035575.1
Cup000041g029033.1	1.30332	8.44851e-15	3.56692e-13			Cup000045g030894.1	-1.48127	2.21988e-08	3.1925e-07				Cup000093g038782.1	Cup000122g040774.1	Cup000003g002768.1
Cup000098g039297.1	1.30278	1.77687e-05	0.000128694			Cup000008g008411.1	-1.47915	9.35983e-05	0.00056009				Cup000037g027347.1	Cup000060g034360.1	Cup000044g030174.1
Cup000033g026033.1	1.30112	5.88098e-06	4.81219e-05			Cup000032g025128.1	-1.47889	4.67091e-15	2.03521e-13				Cup000008g008071.1	Cup000035g026515.1	Cup000035g026746.1
Cup000011g011875.A	1.30072	1.01019e-07	1.25473e-06			Cup000083g037475.1	-1.47742	3.4484e-35	1.17252e-32				Cup000045g030902.1	Cup000006g006757.1	Cup000010g011069.1
Cup000012g012381.A	1.30013	3.07689e-11	7.54017e-10			Cup000016g016040.1	-1.47658	2.55788e-17	1.55358e-15				Cup000012g012436.1	Cup000030g024136.1	Cup000008g008305.1
Cup000007g007783.1	1.29847	5.15752e-11	1.21842e-09			Cup000003g002685.1	-1.47612	2.43438e-20	2.07861e-18				Cup000064g035137.1	Cup000019g017999.A	Cup000020g018885.1
Cup000019g017763.1	1.29807	1.23012e-14	5.02632e-13			Cup000038g027769.1	-1.47243	8.45609e-05	0.000513596				Cup000172g042728.1	Cup000251g043780.1	Cup000001g001447.1
Cup000075g036836.A	1.29614	1.71776e-12	5.15897e-11			Cup000196g043273.1	-1.47242	1.68346e-17	1.04413e-15				Cup000041g028978.1	Cup000002g001627.1	Cup000042g029693.1
Cup000005g005717.1	1.29475	2.26385e-24	3.14642e-22			Cup000213g043514.A	-1.47163	1.4941e-06	1.43067e-05				Cup000004g004471.1	Cup002538g046255.1	Cup000008g008550.1
Cup000092g038495.1	1.29446	2.17234e-06	1.98395e-05			Cup000032g025368.A	-1.4695	9.95434e-15	4.16573e-13				Cup000017g016815.1	Cup000017g016337.1	Cup000039g028395.1
Cup000016g015890.1	1.29306	9.34999e-10	1.7431e-08			Cup000010g010333.1	-1.46886	2.74578e-05	0.00018998				Cup000001g001111.1	Cup000034g026360.1	Cup000049g032027.1
Cup000020g018433.1	1.29194	0.00020248	0.00110124			Cup000019g018177.1	-1.46617	7.02305e-06	5.64244e-05				Cup000070g036211.1	Cup000025g021750.1	Cup000138g041415.1
Cup000017g016491.1	1.29166	2.83273e-06	2.51929e-05			Cup000032g025140.1	-1.46219	3.62143e-11	8.76183e-10				Cup000003g002985.1	Cup000031g024663.1	Cup000003g003199.1
Cup000092g038520.1	1.29069	2.74829e-06	2.45566e-05			Cup000008g008696.1	-1.46189	1.76351e-06	1.66068e-05				Cup000051g032607.1	Cup000025g021591.A	Cup000051g032438.1
Cup000112g040312.1	1.29055	1.68506e-05	0.000122697			Cup000044g030147.1	-1.46087	0.000319275	0.0016404				Cup000077g036973.1	Cup000038g027961.1	Cup000006g006040.1
Cup000009g009260.1	1.28954	6.28786e-16	3.14244e-14			Cup000030g024089.1	-1.45991	8.99819e-09	1.3907e-07				Cup000006g006482.1	Cup000018g017092.1	Cup000011g011175.1
Cup000089g038234.1	1.28811	3.89783e-19	2.89917e-17			Cup000025g021614.A	-1.45705	1.77278e-06	1.66776e-05				Cup000005g005549.1	Cup000051g032547.1	Cup000026g022258.1
Cup000013g013250.1	1.28793	1.87344e-08	2.71892e-07			Cup000019g018214.1	-1.45579	2.68124e-11	6.63032e-10				Cup000011g011935.1	Cup000002g001713.1	Cup000063g035092.1
Cup000030g024441.1	1.28531	0.000656982	0.00304666			Cup000035g026881.1	-1.45512	8.54106e-17	4.85464e-15				Cup000014g014539.1	Cup000010g010798.1	Cup000040g028768.1
Cup000074g036761.1	1.28187	6.82628e-14	2.4996e-12			Cup000032g025336.1	-1.45486	1.72699e-22	1.95018e-20				Cup000070g036259.1	Cup000038g028054.1	Cup000038g027694.1
Cup000044g030440.1	1.28145	1.3513e-21	1.36862e-19			Cup000048g031837.1	-1.45402	0.000604726	0.00283431				Cup000072g036425.1	Cup000270g043947.1	Cup000032g025070.1
Cup000008g008278.1	1.28022	1.08304e-17	6.99054e-16			Cup000019g018096.1	-1.45148	3.29856e-23	4.05212e-21				Cup000011g011883.A	Cup000010g010211.1	Cup000044g030480.1
Cup000006g006080.1	1.27779	2.08266e-05	0.00014797			Cup000010g010424.1	-1.45015	3.05353e-08	4.25017e-07				Cup000007g007829.1	Cup000093g038713.1	Cup000026g022253.1
Cup000048g031619.A	1.27775	0.000321774	0.00165279			Cup000003g002619.1	-1.44922	8.5769e-06	6.73732e-05				Cup000094g038851.A	Cup000005g005644.A	Cup000024g021119.1
Cup000046g031026.1	1.27738	7.63173e-16	3.76466e-14			Cup000009g009071.1	-1.44871	1.06661e-17	6.90796e-16				Cup000030g023984.1	Cup000044g030318.A	Cup000039g028221.1
Cup000016g015847.1	1.27409	1.19802e-16	6.67005e-15			Cup000009g009280.1	-1.44399	3.43572e-06	2.97768e-05				Cup000004g003826.1	Cup000018g017563.1	Cup000001g001019.1
Cup000024g020990.1	1.27273	3.12156e-12	8.97849e-11			Cup000029g023887.A	-1.43783	0.000904766	0.00400457				Cup000058g034108.1	Cup000005g005050.1	Cup000019g017932.1
Cup000004g004655.1	1.27239	2.74524e-11	6.77979e-10			Cup000062g034924.1	-1.43387	7.81134e-24	1.02576e-21				Cup000040g028509.1	Cup000040g028823.1	Cup000107g040079.1
Cup000022g019997.1	1.27215	7.53843e-20	5.95599e-18			Cup000039g028208.1	-1.43288	0.00023666	0.00126687				Cup000001g000013.1	Cup000035g026571.1	Cup000008g008344.A
Cup000018g017461.1	1.27195	0.000766869	0.00348086			Cup000005g005449.1	-1.43263	5.07526e-06	4.21264e-05				Cup000044g030451.1	Cup000066g035568.1	Cup000039g028475.A
Cup000010g010825.1	1.27069	2.50872e-08	3.56482e-07			Cup000051g032420.1	-1.4324	6.75934e-11	1.55874e-09				Cup000079g037190.1	Cup000007g007600.1	Cup000030g023938.1
Cup000101g039475.1	1.27044	0.00110431	0.00474974			Cup000024g020835.A	-1.43051	1.9044e-10	4.06977e-09				Cup000042g029517.1	Cup000024g020995.1	Cup000001g000084.1
Cup000043g029893.1	1.26905	8.45668e-17	4.82107e-15			Cup000014g014586.1	-1.42962	0.000161835	0.000905133				Cup000009g009082.1	Cup000003g002664.1	Cup000032g025188.1
Cup000038g027746.A	1.2671	1.57562e-07	1.86229e-06			Cup000213g043510.A	-1.42682	2.1949e-08	3.15896e-07				Cup000013g013790.1	Cup000035g026670.1	Cup000052g032767.1
Cup000002g002099.1	1.26654	2.56196e-17	1.55358e-15			Cup000044g030239.1	-1.4254	1.4105e-07	1.67858e-06				Cup000011g011223.1	Cup000010g010469.1	Cup000028g023187.1
Cup000009g009587.1	1.2661	1.05252e-07	1.29382e-06			Cup000032g025444.1	-1.42464	8.1608e-05	0.000497566				Cup000045g030894.1	Cup000009g009340.1	Cup000007g007955.A
Cup000013g013038.1	1.26402	5.3852e-09	8.69717e-08			Cup000069g036102.1	-1.42306	8.3254e-05	0.000506952				Cup000006g006079.1	Cup000018g017597.1	Cup000013g013055.1
Cup000055g033563.A	1.26314	1.16828e-06	1.14548e-05			Cup000008g008080.1	-1.42213	7.13901e-18	4.71993e-16					Cup000091g038354.A	Cup000085g037809.1
Cup000104g039818.1	1.26283	8.92619e-18	5.84067e-16			Cup000025g021635.1	-1.4214	6.16913e-09	9.87943e-08					Cup000118g040565.1	Cup000001g000047.1
Cup000003g002731.1	1.26195	1.34264e-14	5.451e-13			Cup000017g016273.1	-1.42056	5.81361e-16	2.92849e-14					Cup000028g023194.1	Cup000053g033054.1
Cup000010g010770.1	1.26176	6.84151e-07	7.03017e-06			Cup000024g021127.1	-1.42023	4.18819e-08	5.7028e-07					Cup000039g028399.1	Cup000006g006095.1
Cup000045g030622.1	1.26062	7.78832e-06	6.18937e-05			Cup000012g012295.1	-1.41971	3.28349e-07	3.62231e-06					Cup000004g004333.1	Cup000007g007775.1
Cup000009g009013.1	1.26062	7.0724e-22	7.39921e-20			Cup000001g000439.1	-1.41836	0.000253224	0.00134458					Cup000005g005324.1	Cup000001g000138.1
Cup000002g002262.1	1.25959	4.85357e-10	9.65693e-09			Cup000002g001755.1	-1.41818	5.82693e-12	1.60798e-10					Cup000045g030615.1	Cup000005g004886.1
Cup000031g024972.1	1.25893	1.30835e-09	2.35244e-08			Cup000175g042814.1	-1.41691	0.000590828	0.0027769					Cup000023g020511.1	Cup000007g007036.1
Cup000011g011468.1	1.25839	1.53896e-29	3.6177e-27			Cup000008g008126.1	-1.41459	1.98621e-26	3.63649e-24					Cup000120g040667.1	Cup000002g002266.1
Cup000002g001744.1	1.25805	1.25869e-15	5.91772e-14			Cup000024g021185.A	-1.41376	4.18108e-25	6.31841e-23					Cup000027g022724.1	Cup000041g029330.1
Cup000009g009582.1	1.25761	3.83378e-05	0.000255778			Cup000001g000403.1	-1.41323	1.70377e-21	1.69851e-19					Cup000019g017886.1	Cup000032g025397.1
Cup000086g037892.1	1.25494	5.08448e-08	6.7987e-07			Cup000020g018579.1	-1.40942	6.21876e-10	1.20705e-08					Cup000033g026018.1	Cup000144g041744.1
Cup000048g031800.1	1.25397	4.94373e-10	9.82604e-09			Cup000003g002592.1	-1.40917	4.98108e-11	1.18095e-09					Cup000016g015931.1	Cup000013g013220.1
Cup000045g030652.1	1.24879	1.15363e-05	8.72025e-05			Cup000094g038883.A	-1.40801	2.91991e-07	3.24945e-06					Cup000041g029001.1	Cup000006g006358.1
Cup000001g000153.1	1.24675	5.83245e-07	6.07525e-06			Cup000168g042532.1	-1.40668	3.85093e-13	1.27745e-11					Cup000013g013668.1	Cup000031g024579.1
Cup000014g014149.1	1.24623	0.000488661	0.00236818			Cup000032g025195.A	-1.40646	3.40172e-07	3.73452e-06					Cup000062g034912.1	Cup000016g015908.1
Cup000003g002694.1	1.2447	0.00196902	0.00780597			Cup000001g000192.1	-1.4046	4.99136e-10	9.91037e-09					Cup000035g026967.1	Cup000018g017554.1
Cup000008g008681.1	1.24461	3.48956e-25	5.40202e-23			Cup000013g013641.1	-1.40044	0.000729451	0.00333241					Cup000060g034379.1	Cup000045g030721.1
Cup000043g029984.A	1.24135	4.93856e-09	8.04407e-08			Cup000002g002193.1	-1.39764	1.86637e-05	0.000134154					Cup000015g015142.A	Cup000009g009827.1
Cup000101g039478.1	1.24131	0.000167587	0.000931959			Cup000032g025131.1	-1.39417	1.12017e-11	2.97062e-10					Cup000022g020012.1	Cup000026g021991.1
Cup000027g022691.1	1.23918	3.66986e-09	6.1189e-08			Cup000061g034768.1	-1.39362	5.90118e-15	2.52504e-13					Cup000029g023403.1	Cup000004g003696.1
Cup000052g032818.1	1.23847	8.98864e-11	2.03269e-09			Cup000052g032747.1	-1.39274	1.40313e-06	1.35207e-05					Cup000048g031890.A	Cup000032g025073.1
Cup000030g024042.1	1.2371	0.0036342	0.013221			Cup000024g020752.1	-1.39262	0.000316846	0.00163012					Cup002059g046071.1	Cup000031g024708.1
Cup000108g040179.1	1.23701	6.05801e-08	7.95522e-07			Cup000054g033426.1	-1.39262	0.000759263	0.00345286					Cup000011g011251.1	Cup000010g010455.1
Cup000014g014165.1	1.23612	2.3641e-06	2.13847e-05			Cup000001g000337.1	-1.39162	2.03456e-07	2.34611e-06					Cup000020g018512.A	Cup000063g035082.1
Cup002808g046365.1	1.23544	0.00433931	0.0153378			Cup000016g015606.1	-1.38963	4.99843e-15	2.17295e-13					Cup000197g043286.1	Cup000001g000136.1
Cup000019g017885.1	1.23473	2.31839e-13	7.95396e-12			Cup000074g036764.1	-1.38885	0.000190071	0.00104148					Cup000021g019204.1	Cup000022g019881.1
Cup000017g016378.1	1.23373	3.47623e-10	7.12496e-09			Cup000015g015057.1	-1.38885	0.000683182	0.00315128					Cup000051g032562.1	Cup000014g014218.1
Cup000041g029294.1	1.23297	0.000242149	0.00129407			Cup000153g042059.1	-1.38825	1.75732e-06	1.65568e-05					Cup000034g026188.1	Cup000006g006070.1
Cup000009g009629.1	1.23251	7.91311e-13	2.52385e-11			Cup000044g030282.1	-1.38603	6.13477e-10	1.19318e-08					Cup000021g019275.A	Cup000043g029869.A
Cup000011g011412.1	1.23228	8.66156e-06	6.78982e-05			Cup000023g020447.1	-1.38591	0.000618615	0.00289198					Cup000009g009281.1	Cup000026g021898.1
Cup000051g032425.A	1.23139	6.01712e-21	5.64394e-19			Cup000037g027489.1	-1.38509	5.06872e-13	1.65684e-11					Cup000053g033028.1	Cup000002g002142.1
Cup000013g013793.1	1.23126	3.81729e-16	1.95917e-14			Cup000020g019084.1	-1.38477	0.000545316	0.0025913					Cup000042g029726.1	Cup000002g002445.A
Cup000049g032097.1	1.23125	1.31563e-17	8.37821e-16			Cup000019g017854.1	-1.38476	7.79397e-09	1.21943e-07					Cup000134g041263.1	Cup000028g022896.1
Cup000031g024898.1	1.22952	2.92418e-12	8.44604e-11			Cup000001g001014.1	-1.38153	2.89912e-13	9.805e-12					Cup000038g027635.1	Cup000271g043964.1
Cup000021g019491.1	1.22812	2.92757e-12	8.44604e-11			Cup000003g002662.1	-1.38148	4.13816e-20	3.41102e-18					Cup000009g009025.1	Cup000010g010419.1
Cup000044g030211.1	1.22545	3.30109e-06	2.87671e-05			Cup000017g016293.1	-1.37977	3.40861e-06	2.95822e-05					Cup000001g001162.1	Cup000014g014360.1
Cup000003g002585.1	1.22542	3.39035e-09	5.71289e-08			Cup000032g025359.1	-1.37944	4.6797e-09	7.67495e-08					Cup000003g002718.1	Cup000038g028061.1
Cup000002g001527.1	1.22501	1.09897e-07	1.34482e-06			Cup000029g023514.1	-1.37791	3.53891e-07	3.85274e-06					Cup000032g025322.1	Cup000103g039612.1
Cup000004g004662.A	1.22307	0.000280698	0.00146917			Cup000003g002985.1	-1.37679	2.86181e-05	0.000197148					Cup000060g034495.1	Cup000029g023675.A
Cup000013g013249.1	1.22255	2.76498e-17	1.66601e-15			Cup000032g025345.1	-1.37536	8.56097e-08	1.08389e-06					Cup000017g016895.1	Cup000051g032676.A
Cup000005g005466.1	1.22249	4.69571e-12	1.31487e-10			Cup000049g031996.A	-1.375	6.97166e-11	1.60517e-09					Cup000025g021623.1	Cup000024g020831.1
Cup000498g044757.A	1.22107	0.000377515	0.00188718			Cup000032g025439.1	-1.37025	7.14981e-05	0.000442442					Cup000049g032132.1	Cup000011g011489.1
Cup000051g032434.1	1.22098	5.99336e-11	1.3934e-09			Cup000008g008802.1	-1.36714	1.30234e-09	2.34385e-08					Cup000024g020714.1	Cup000010g010804.1
Cup000052g032946.1	1.21976	3.75733e-05	0.000251294			Cup000066g035745.1	-1.36584	5.02413e-09	8.16947e-08					Cup000054g033388.1	Cup000144g041712.1
Cup000047g031450.1	1.21381	3.08425e-05	0.000210616			Cup000012g012779.1	-1.36481	6.7187e-14	2.46971e-12					Cup000038g027928.1	Cup000022g019648.1
Cup000122g040774.1	1.21302	6.29141e-05	0.000395885			Cup000193g043186.1	-1.35901	3.72464e-06	3.20185e-05					Cup000005g005617.1	Cup000030g024036.1
Cup000060g034360.1	1.21275	1.36744e-10	3.01359e-09			Cup000004g003971.1	-1.35855	3.45064e-05	0.000232992					Cup000008g008654.1	Cup000026g021940.1
Cup000035g026515.1	1.21248	1.39257e-11	3.65737e-10			Cup000117g040502.1	-1.35588	8.05447e-16	3.93244e-14					Cup000020g018884.1	Cup000013g013656.1
Cup000006g006757.1	1.21098	3.01683e-05	0.000206706			Cup000009g009029.1	-1.35182	5.92945e-16	2.97896e-14					Cup000020g018802.1	Cup000019g017810.1
Cup000030g024136.1	1.21051	3.69625e-23	4.48283e-21			Cup000089g038236.1	-1.35062	6.37634e-23	7.58824e-21					Cup000120g040662.1	Cup000032g025134.1
Cup000019g017999.A	1.21014	2.36897e-21	2.3182e-19			Cup000024g021081.1	-1.35028	8.11518e-16	3.95195e-14					Cup000011g011732.1	Cup000039g028277.1
Cup000251g043780.1	1.20982	0.00404297	0.0144513			Cup000011g011480.1	-1.3502	1.59209e-13	5.57145e-12					Cup000009g009655.1	Cup000007g007683.1
Cup000002g001627.1	1.20875	1.46597e-11	3.82902e-10			Cup000038g027975.1	-1.349	8.66846e-05	0.000524821					Cup000175g042803.1	Cup000006g006186.A
Cup002538g046255.1	1.20843	0.000577825	0.00272538			Cup000104g039827.1	-1.34766	0.000412525	0.00203811					Cup000007g008046.A	Cup000127g040936.1
Cup000017g016337.1	1.20748	4.08002e-05	0.00027003			Cup000051g032440.1	-1.34713	0.000293468	0.00152759					Cup000025g021624.1	Cup000004g003837.1
Cup000034g026360.1	1.20687	0.000136755	0.000781263			Cup000040g028770.1	-1.34472	5.68283e-21	5.35677e-19					Cup000023g020453.1	Cup000007g007813.1
Cup000025g021750.1	1.20631	9.53456e-11	2.14595e-09			Cup000074g036641.1	-1.34462	8.63288e-06	6.77292e-05					Cup000026g022007.1	Cup000009g009816.1
Cup000031g024663.1	1.20612	5.40232e-13	1.74942e-11			Cup000030g024326.1	-1.34363	5.58318e-05	0.000356743					Cup000154g042164.1	Cup000039g028439.1
Cup000003g002932.1	1.2058	0.0020797	0.00816823			Cup000044g030385.1	-1.34355	5.67824e-05	0.000361241					Cup000034g026376.1	Cup000009g009705.1
Cup000025g021591.A	1.20507	2.04823e-15	9.32687e-14			Cup000005g005096.1	-1.34333	9.1158e-08	1.14646e-06					Cup000007g007788.1	Cup000007g007148.1
Cup000038g027961.1	1.2025	3.03327e-05	0.000207608			Cup000003g003134.1	-1.34309	0.000170949	0.000947612					Cup000053g033056.1	Cup000005g005852.1
Cup000143g041619.1	1.20159	0.00507962	0.017472			Cup000021g019439.1	-1.34303	4.45749e-07	4.77363e-06					Cup000031g024618.1	Cup000164g042450.1
Cup000018g017092.1	1.20128	9.74347e-25	1.4055e-22			Cup000006g006320.A	-1.34188	0.000365874	0.00183718					Cup000001g000268.1	Cup000002g002053.A
Cup000051g032547.1	1.20059	3.32474e-21	3.21352e-19			Cup000038g028076.1	-1.33956	2.08614e-16	1.11579e-14					Cup000091g038448.1	Cup000020g018801.A
Cup000002g001713.1	1.20042	6.52286e-18	4.34272e-16			Cup000002g001757.1	-1.33875	5.67213e-05	0.000361093					Cup000015g014941.1	Cup000101g039487.1
Cup000010g010798.1	1.19984	9.71826e-08	1.21339e-06			Cup000020g018800.A	-1.33833	2.01699e-06	1.86525e-05					Cup000012g012784.1	Cup000061g034667.1
Cup000038g028054.1	1.19809	7.89573e-23	9.22347e-21			Cup000028g023129.A	-1.33624	0.000361691	0.00182099					Cup000041g029284.1	Cup000010g010456.1
Cup000270g043947.1	1.19762	2.00557e-05	0.000143014			Cup000035g026847.1	-1.33316	1.62577e-16	8.74472e-15					Cup000009g009283.1	Cup000011g011966.1
Cup000003g002778.1	1.19666	0.00119123	0.00506639			Cup000004g004113.1	-1.33168	0.000235908	0.00126355					Cup000048g031834.1	Cup000008g008125.1
Cup000010g010211.1	1.19616	1.57641e-09	2.79743e-08			Cup000016g015819.1	-1.33126	1.51653e-06	1.44888e-05					Cup000002g001547.1	Cup000011g011288.1
Cup000093g038713.1	1.19608	1.46607e-06	1.40632e-05			Cup000001g000912.1	-1.33022	2.91958e-07	3.24945e-06					Cup000008g008298.1	Cup000001g000139.1
Cup000005g005644.A	1.19579	1.04751e-14	4.34528e-13			Cup000033g025685.1	-1.32889	1.87854e-09	3.29974e-08					Cup000018g017046.1	Cup000011g011938.1
Cup000044g030318.A	1.19409	2.03785e-15	9.30522e-14			Cup000005g005133.1	-1.32764	4.69587e-07	5.00359e-06					Cup000046g031039.1	Cup000043g030046.1
Cup000018g017563.1	1.19335	2.15496e-05	0.000152765			Cup000002g001588.1	-1.32683	6.02283e-12	1.65723e-10					Cup000056g033897.1	Cup000016g015644.1
Cup000005g005050.1	1.19333	4.48083e-05	0.0002938			Cup000031g024594.1	-1.32667	0.000113561	0.00066207					Cup000021g019208.1	Cup000040g028607.1
Cup000040g028823.1	1.19288	4.39148e-15	1.92669e-13			Cup000077g036973.1	-1.32575	7.76652e-06	6.17462e-05					Cup000010g010980.1	Cup000032g025343.A
Cup000016g015865.1	1.19076	0.000760306	0.00345595			Cup000032g025146.1	-1.32373	8.90164e-05	0.00053706					Cup000019g017783.1	Cup000029g023801.1
Cup000035g026571.1	1.19044	1.26517e-07	1.52276e-06			Cup000063g035045.1	-1.32295	8.42274e-09	1.31242e-07					Cup000018g017442.1	Cup000016g015970.1
Cup000066g035568.1	1.19006	4.14301e-15	1.82187e-13			Cup000032g025437.1	-1.32293	4.4151e-15	1.93259e-13					Cup000098g039234.1	Cup000088g038150.1
Cup000007g007600.1	1.1896	1.60287e-10	3.49602e-09			Cup000007g007317.1	-1.32009	0.00118234	0.00503193					Cup000029g023459.1	Cup000069g036160.1
Cup000024g020995.1	1.18584	3.30803e-10	6.79484e-09			Cup000061g034647.1	-1.31988	1.07775e-05	8.22171e-05					Cup000096g039078.1	Cup000035g026850.1
Cup000003g002664.1	1.18576	9.05689e-16	4.34389e-14			Cup002868g046386.1	-1.31916	0.000881047	0.00391505					Cup000023g020464.1	Cup000024g020783.1
Cup000035g026670.1	1.1837	4.77605e-14	1.83348e-12			Cup000086g037948.A	-1.31761	2.54625e-25	4.00687e-23					Cup000002g002055.1	Cup000265g043891.1
Cup000048g031801.1	1.18187	0.000222242	0.00119743			Cup000060g034430.1	-1.31726	4.76384e-08	6.40595e-07					Cup000103g039672.1	Cup000031g024840.1
Cup000010g010469.1	1.18011	4.37847e-09	7.21198e-08			Cup000104g039817.1	-1.31636	0.000524958	0.00251086					Cup000003g003344.1	Cup000083g037560.1
Cup000047g031524.1	1.17861	0.00584117	0.0195675			Cup000024g020821.1	-1.31296	1.07211e-08	1.63051e-07					Cup000001g001217.1	Cup000026g022079.1
Cup000009g009340.1	1.1774	8.6782e-10	1.63282e-08			Cup000085g037804.1	-1.31199	1.09426e-10	2.44838e-09					Cup000023g020345.1	Cup000022g019647.1
Cup000018g017597.1	1.17709	2.16186e-10	4.56869e-09			Cup000014g014113.1	-1.31057	4.26676e-17	2.4998e-15					Cup000009g009352.1	Cup000028g023244.1
Cup000091g038354.A	1.17645	2.46844e-05	0.000172863			Cup000042g029708.1	-1.31007	1.55696e-07	1.84137e-06					Cup000004g004355.1	Cup000042g029508.1
Cup000118g040565.1	1.17572	1.04266e-10	2.33844e-09			Cup000047g031564.1	-1.3085	2.92696e-06	2.59031e-05					Cup000025g021341.1	Cup000032g025098.1
Cup000028g023194.1	1.17561	2.68822e-20	2.28511e-18			Cup000012g012697.1	-1.30676	0.00016186	0.000905133					Cup000003g002870.1	Cup000104g039852.A
Cup000202g043334.1	1.17518	0.000331872	0.00169733			Cup000037g027282.1	-1.30468	2.34626e-10	4.92559e-09					Cup000021g019236.1	Cup000029g023755.1
Cup000039g028399.1	1.1745	2.5681e-15	1.15601e-13			Cup000012g012434.A	-1.29807	3.33166e-06	2.89937e-05					Cup000005g005912.A	Cup000049g032117.1
Cup000004g004333.1	1.17375	6.69617e-10	1.2879e-08			Cup000020g018566.1	-1.2941	0.00111811	0.00479935					Cup000075g036844.1	Cup000055g033470.1
Cup000117g040539.1	1.17369	1.10568e-05	8.41124e-05			Cup000022g020110.1	-1.29181	4.57253e-05	0.000299195					Cup000015g015102.1	Cup000092g038571.1
Cup000005g005324.1	1.17368	3.27839e-23	4.05212e-21			Cup000019g017788.1	-1.29101	3.79864e-10	7.68649e-09					Cup000011g011855.1	Cup000017g016830.1
Cup000045g030615.1	1.17265	5.20393e-19	3.85556e-17			Cup002497g046241.1	-1.28989	0.00144823	0.00598704					Cup000040g028604.1	Cup000026g022212.1
Cup000023g020511.1	1.1725	0.00151274	0.0062118			Cup000005g005529.1	-1.28817	3.02426e-17	1.79953e-15					Cup000002g001728.A	Cup000008g008875.1
Cup000120g040667.1	1.17214	3.31678e-05	0.000225071			Cup000040g028798.1	-1.28796	4.69236e-06	3.92562e-05					Cup000091g038341.1	Cup000001g001133.1
Cup000027g022724.1	1.17208	6.48025e-05	0.000405223			Cup000026g022348.1	-1.28705	0.000465059	0.00226823					Cup000006g006108.A	Cup000011g011812.A
Cup000019g017886.1	1.17033	3.46922e-14	1.34615e-12			Cup000058g034143.1	-1.28588	2.40877e-11	5.99547e-10					Cup000103g039600.1	Cup000042g029670.A
Cup000033g026018.1	1.16914	1.3583e-07	1.62459e-06			Cup000054g033239.A	-1.28564	2.08655e-05	0.000148191					Cup000024g021238.1	Cup000015g015054.1
Cup000016g015931.1	1.16784	3.83685e-20	3.17641e-18			Cup000009g009906.1	-1.28373	3.16133e-06	2.7714e-05					Cup000004g004466.1	Cup000017g016964.1
Cup000041g029001.1	1.16725	2.15273e-09	3.75024e-08			Cup000032g025436.1	-1.28196	2.04402e-12	6.04351e-11					Cup000001g001068.1	Cup000104g039724.1
Cup000013g013668.1	1.16721	1.17535e-18	8.50944e-17			Cup000043g030022.1	-1.28179	2.38358e-06	2.15405e-05					Cup000085g037773.1	Cup000134g041266.A
Cup000013g013563.1	1.16689	0.00184589	0.00738239			Cup000092g038616.1	-1.28147	1.69794e-15	7.80931e-14					Cup000009g009610.1	Cup000038g027743.1
Cup000062g034912.1	1.1667	4.85903e-11	1.15363e-09			Cup000024g020774.1	-1.28107	4.4989e-06	3.78205e-05					Cup000290g044057.A	Cup000066g035678.A
Cup000035g026967.1	1.16667	9.56377e-10	1.77563e-08			Cup000058g034158.A	-1.28074	2.35653e-07	2.6707e-06					Cup000025g021349.1	Cup000012g012705.1
Cup000060g034379.1	1.16621	1.12841e-09	2.06995e-08			Cup000077g036995.1	-1.28002	0.000519455	0.00248829					Cup000012g012661.1	Cup000003g003435.A
Cup000019g017935.1	1.16586	0.000909123	0.00402105			Cup000027g022532.1	-1.27929	0.000844452	0.00377535					Cup000030g024439.1	Cup000092g038613.1
Cup000015g015142.A	1.16573	2.5853e-05	0.000179857			Cup000037g027467.1	-1.2791	2.13399e-24	2.98775e-22					Cup000008g008534.1	Cup000089g038237.1
Cup000022g020012.1	1.1634	6.07858e-05	0.000384271			Cup000060g034400.1	-1.27849	3.45203e-07	3.77325e-06					Cup000091g038410.1	Cup000020g018475.1
Cup000029g023403.1	1.16296	8.3884e-06	6.59742e-05			Cup000015g015240.1	-1.27564	8.87135e-06	6.93714e-05					Cup000045g030848.1	Cup000007g007732.1
Cup000062g034963.1	1.16288	0.000422511	0.0020842			Cup000010g010909.1	-1.275	0.000302767	0.00156615					Cup000159g042280.1	Cup000029g023465.1
Cup000048g031890.A	1.16142	2.26451e-06	2.05718e-05			Cup000065g035448.1	-1.27312	3.75601e-18	2.58189e-16					Cup000008g008759.1	Cup000005g005979.A
Cup002059g046071.1	1.16126	2.90585e-05	0.000199749			Cup000040g028708.1	-1.27282	6.47982e-05	0.000405223					Cup000100g039399.A	Cup006874g046891.1
Cup000009g009188.1	1.16048	6.25032e-05	0.00039395			Cup000014g014553.1	-1.27259	0.00154871	0.00634443					Cup000021g019106.1	Cup000013g013621.1
Cup000011g011251.1	1.15937	1.16996e-09	2.13792e-08			Cup000004g004585.1	-1.26901	8.54872e-14	3.0946e-12					Cup000013g013533.A	Cup000012g012352.A
Cup000020g018512.A	1.15892	3.95602e-06	3.37523e-05			Cup000004g004637.1	-1.26833	2.42203e-07	2.73534e-06					Cup000013g013015.1	Cup000009g009637.1
Cup000197g043286.1	1.15831	3.22585e-07	3.56078e-06			Cup000003g003226.1	-1.26561	1.31204e-16	7.26235e-15					Cup000024g020661.1	Cup000086g037907.1
Cup000021g019204.1	1.15649	2.42218e-14	9.58851e-13			Cup000027g022709.1	-1.2654	0.00129216	0.00543016					Cup000040g028881.1	Cup000013g013423.1
Cup000051g032562.1	1.15531	1.01299e-05	7.80587e-05			Cup000073g036584.1	-1.26493	1.63179e-05	0.000119228					Cup000009g009218.1	Cup000022g020123.A
Cup000034g026188.1	1.15516	1.7253e-08	2.52121e-07			Cup000042g029749.1	-1.26433	5.53303e-06	4.55292e-05					Cup000147g041864.1	Cup000003g002889.1
Cup000021g019275.A	1.15453	1.9877e-12	5.89529e-11			Cup000008g008345.1	-1.26392	7.46425e-10	1.42412e-08					Cup000086g037993.1	Cup000006g006828.1
Cup000009g009281.1	1.15411	5.86146e-06	4.80035e-05			Cup000008g008672.1	-1.26295	0.00297437	0.0111399					Cup000009g009742.1	Cup000021g019490.1
Cup000053g033028.1	1.15388	0.000200081	0.00109037			Cup000058g034090.1	-1.25899	1.68651e-11	4.32206e-10					Cup000010g010192.1	Cup000032g025452.1
Cup000042g029726.1	1.15358	6.03419e-10	1.17482e-08			Cup000003g002637.1	-1.25885	1.16703e-18	8.48144e-17					Cup000007g007106.1	Cup000089g038214.1
Cup000108g040188.1	1.15357	9.15115e-05	0.000550023			Cup000013g013882.1	-1.25882	5.04642e-05	0.000327501					Cup000057g033942.1	Cup000010g010741.1
Cup000134g041263.1	1.15118	0.00332896	0.0122842			Cup000039g028266.1	-1.25872	0.000537081	0.00255984					Cup000013g013076.1	Cup000032g025333.1
Cup000038g027635.1	1.15115	8.79232e-10	1.64616e-08			Cup000017g016416.1	-1.25864	0.000237893	0.00127275					Cup000102g039562.1	Cup000014g014594.1
Cup000009g009025.1	1.15069	2.04293e-05	0.000145364			Cup000018g017277.1	-1.25684	3.09566e-09	5.23951e-08					Cup000033g025894.1	Cup000037g027529.1
Cup000001g001162.1	1.14988	2.03848e-10	4.33684e-09			Cup000065g035460.1	-1.25654	3.68283e-05	0.000246918					Cup000043g030034.1	Cup000071g036367.1
Cup000003g002718.1	1.14975	2.08461e-18	1.48109e-16			Cup000051g032627.1	-1.25448	8.89649e-07	8.94865e-06					Cup000130g041048.A	Cup000130g041064.1
Cup000032g025322.1	1.1493	6.57621e-11	1.51963e-09			Cup000021g019418.1	-1.25417	1.13854e-08	1.72328e-07					Cup000010g010438.1	Cup000024g020798.1
Cup000060g034495.1	1.14845	4.7615e-06	3.97822e-05			Cup000052g032876.1	-1.25384	4.09002e-06	3.47737e-05					Cup000083g037456.1	Cup000706g045093.A
Cup000017g016895.1	1.14768	2.61061e-28	5.52319e-26			Cup000044g030225.1	-1.2536	4.39043e-10	8.78133e-09					Cup000055g033559.1	Cup000022g019636.1
Cup000025g021623.1	1.14731	3.94229e-17	2.324e-15			Cup000026g022353.1	-1.25332	1.93847e-34	6.15172e-32					Cup000005g005557.1	Cup000003g003213.1
Cup000049g032132.1	1.14701	4.73574e-09	7.76018e-08			Cup000050g032204.1	-1.25154	0.000692719	0.00318678					Cup000009g009002.1	Cup000033g025916.1
Cup000024g020714.1	1.14681	1.41904e-05	0.000105177			Cup000025g021668.1	-1.25039	1.04255e-07	1.28462e-06					Cup000114g040369.1	Cup000006g006303.1
Cup000011g012006.1	1.14545	0.000893938	0.00396494			Cup000014g014526.1	-1.24878	0.00051182	0.00245914					Cup000008g008062.1	Cup000003g002864.A
Cup000054g033388.1	1.14442	0.00104102	0.00451472			Cup000008g008313.1	-1.24865	1.24987e-08	1.87539e-07					Cup000042g029494.1	Cup000020g018426.1
Cup000038g027928.1	1.14352	5.59861e-17	3.22064e-15			Cup000001g000522.1	-1.24853	0.00208801	0.00819581					Cup000018g017539.1	Cup000026g022390.1
Cup000005g005617.1	1.14183	8.67401e-10	1.63282e-08			Cup000003g003215.1	-1.24842	3.16078e-13	1.06145e-11					Cup000021g019470.1	Cup000013g013123.1
Cup000008g008654.1	1.14067	3.66898e-06	3.164e-05			Cup000037g027283.A	-1.24835	0.000338036	0.00172376					Cup000025g021319.1	Cup000065g035438.1
Cup000020g018884.1	1.14004	0.00024864	0.00132355			Cup000042g029738.1	-1.24805	9.35585e-10	1.7431e-08					Cup000038g028033.1	Cup000019g018275.1
Cup000020g018802.1	1.13847	1.26857e-17	8.10566e-16			Cup000003g002852.1	-1.24725	0.000299628	0.00155244					Cup000053g033039.1	Cup000024g021113.1
Cup000120g040662.1	1.13821	4.46596e-14	1.72488e-12			Cup000180g042926.1	-1.24614	2.06105e-05	0.000146489					Cup000040g028547.1	Cup000008g008530.1
Cup000011g011732.1	1.13814	9.18993e-07	9.20008e-06			Cup000009g009696.A	-1.24597	1.06365e-06	1.04829e-05					Cup000054g033297.1	Cup000006g006611.1
Cup000009g009655.1	1.13781	6.93708e-08	8.98564e-07			Cup000024g020655.1	-1.24559	4.22382e-06	3.57607e-05					Cup000017g016272.1	Cup000032g025361.1
Cup000175g042803.1	1.13707	1.18934e-07	1.44335e-06			Cup000075g036813.1	-1.2402	0.00418011	0.014869					Cup000001g000414.1	Cup000032g025083.1
Cup000007g008046.A	1.13665	5.78681e-20	4.66893e-18			Cup000008g008600.1	-1.23989	8.18654e-08	1.0392e-06					Cup000186g043077.1	Cup000031g024578.1
Cup000025g021624.1	1.13607	1.97178e-15	9.02515e-14			Cup000030g024358.1	-1.2379	0.000159544	0.000895315					Cup000008g008702.1	Cup000018g017161.1
Cup000023g020453.1	1.13514	3.54681e-11	8.5922e-10			Cup000018g017262.1	-1.23737	5.6296e-07	5.88327e-06					Cup000024g021120.1	Cup000018g017258.1
Cup000052g032987.A	1.1351	0.00268163	0.0101959			Cup000011g011337.1	-1.23563	2.95642e-09	5.03968e-08					Cup000050g032273.1	Cup000024g020824.1
Cup000026g022007.1	1.13464	1.13307e-10	2.52927e-09			Cup000024g020807.1	-1.23558	2.5615e-09	4.39797e-08					Cup000057g033950.1	Cup000022g019642.1
Cup000046g031257.1	1.1336	0.00284587	0.010724			Cup000097g039159.A	-1.23535	5.67589e-13	1.83488e-11					Cup000007g007591.1	Cup000072g036498.1
Cup000154g042164.1	1.13278	0.000396714	0.00196817			Cup000009g010097.A	-1.23451	1.92275e-18	1.38155e-16					Cup000005g005545.1	Cup000002g002312.1
Cup000034g026376.1	1.13261	1.2119e-05	9.10645e-05			Cup000061g034771.1	-1.23439	0.00011513	0.000668556					Cup000077g036949.1	Cup000025g021613.1
Cup000007g007788.1	1.13208	2.77886e-14	1.09097e-12			Cup003989g046599.1	-1.23211	4.62133e-05	0.000301662					Cup000006g006245.1	Cup000027g022605.1
Cup000124g040851.1	1.13159	0.00126546	0.00533398			Cup000007g007293.1	-1.23201	7.07788e-10	1.35447e-08					Cup000018g017253.1	Cup000013g013879.1
Cup000053g033056.1	1.13152	1.68243e-05	0.000122552			Cup000012g012729.1	-1.23164	0.000659425	0.00305427					Cup000006g006639.1	Cup000005g005014.1
Cup000031g024618.1	1.13116	7.93619e-06	6.29113e-05			Cup000033g025875.1	-1.23107	6.80163e-19	5.01976e-17					Cup000003g003234.1	Cup000005g005713.1
Cup000001g000268.1	1.13115	2.88413e-11	7.08604e-10			Cup000016g016039.1	-1.22943	5.44042e-11	1.27575e-09					Cup000056g033800.1	Cup000008g008178.A
Cup000091g038448.1	1.13079	2.23782e-12	6.55828e-11			Cup000032g025341.1	-1.2281	1.46536e-08	2.16799e-07					Cup000003g002709.1	Cup000003g002601.1
Cup000015g014941.1	1.1303	1.18844e-12	3.66759e-11			Cup000011g011705.1	-1.22774	8.77438e-10	1.64442e-08					Cup000028g023231.1	Cup000001g001212.1
Cup000012g012784.1	1.13008	4.29757e-17	2.51012e-15			Cup000027g022578.1	-1.22774	3.14127e-08	4.35637e-07					Cup000013g013183.1	Cup000055g033544.1
Cup000041g029284.1	1.12926	1.79378e-11	4.57846e-10			Cup000026g022293.1	-1.22682	0.00115206	0.00491847					Cup000037g027272.1	Cup000035g026883.1
Cup000009g009283.1	1.12794	2.58579e-06	2.32355e-05			Cup000018g017167.1	-1.22668	1.49446e-06	1.43067e-05					Cup000017g016335.A	Cup000004g004651.1
Cup000048g031834.1	1.12772	8.56385e-07	8.64146e-06			Cup000024g020875.1	-1.22546	0.000283142	0.00148072					Cup000206g043382.1	Cup000018g017196.1
Cup000002g001547.1	1.1274	0.00119763	0.00509131			Cup000028g023239.1	-1.22412	0.00400762	0.014346					Cup000050g032210.1	Cup000010g010216.1
Cup000008g008298.1	1.12714	2.692e-05	0.00018653			Cup000023g020262.1	-1.22408	5.80282e-11	1.3524e-09					Cup000038g027722.1	Cup000004g003793.1
Cup000018g017046.1	1.12684	1.29118e-10	2.85877e-09			Cup000016g015995.1	-1.22399	0.00472524	0.0164786					Cup000046g031278.1	Cup000005g005722.1
Cup000046g031039.1	1.12587	6.35387e-25	9.3786e-23			Cup000044g030281.1	-1.22258	4.65551e-15	2.03315e-13					Cup000071g036370.1	Cup000106g039947.1
Cup000056g033897.1	1.12472	1.38321e-16	7.59011e-15			Cup000005g005732.1	-1.2219	6.46756e-12	1.76938e-10					Cup000016g015477.1	Cup000004g003670.1
Cup000012g012433.1	1.12452	0.0049397	0.0170919			Cup000009g009819.1	-1.21879	6.30122e-14	2.33427e-12					Cup000010g011061.A	Cup000169g042608.1
Cup000022g019650.1	1.12433	0.00492354	0.0170422			Cup000013g013652.1	-1.21746	3.6673e-08	5.04181e-07					Cup000019g018136.1	Cup000003g002912.1
Cup000021g019208.1	1.12335	2.69391e-13	9.15976e-12			Cup000048g031624.A	-1.21433	1.49521e-07	1.77405e-06					Cup000044g030168.1	Cup000014g014715.1
Cup000010g010980.1	1.12301	1.74849e-12	5.243e-11			Cup000061g034663.1	-1.21431	1.61033e-20	1.43282e-18					Cup000043g030031.1	Cup000004g004413.1
Cup000019g017783.1	1.12248	1.92727e-08	2.79279e-07			Cup000017g016677.1	-1.21167	6.8378e-07	7.03016e-06					Cup000007g007561.1	Cup000018g017470.1
Cup000018g017442.1	1.12219	9.06241e-07	9.09154e-06			Cup000072g036466.1	-1.21036	0.005051	0.0174043					Cup000007g007229.1	Cup000018g017164.A
Cup000098g039234.1	1.12184	5.12392e-11	1.21198e-09			Cup000069g036089.1	-1.20704	3.22576e-14	1.25864e-12					Cup000013g013305.1	Cup000028g022862.1
Cup000029g023459.1	1.12154	5.50826e-14	2.06869e-12			Cup000019g017752.A	-1.20658	3.70327e-06	3.18924e-05					Cup000072g036497.1	Cup000044g030372.A
Cup000096g039078.1	1.12111	5.4236e-14	2.04497e-12			Cup000066g035575.1	-1.20531	4.79409e-11	1.13963e-09					Cup000004g004328.1	Cup000084g037633.1
Cup000016g015998.1	1.12049	8.44508e-05	0.000513091			Cup000003g002768.1	-1.20416	7.09882e-08	9.15776e-07					Cup000049g032065.1	Cup000159g042284.A
Cup000023g020464.1	1.11932	5.20518e-12	1.44689e-10			Cup000044g030174.1	-1.20414	3.05337e-07	3.38609e-06					Cup000030g024292.1	Cup000008g008235.1
Cup000002g002055.1	1.11918	1.11113e-13	3.96941e-12			Cup000035g026746.1	-1.20365	3.90881e-07	4.22885e-06					Cup000008g008109.1	Cup000052g032929.1
Cup000103g039672.1	1.11737	1.84329e-06	1.72472e-05			Cup000015g015045.1	-1.20241	0.000942419	0.00414808					Cup000001g000057.1	Cup000093g038685.1
Cup000003g003344.1	1.11673	2.21564e-13	7.62894e-12			Cup000010g011069.1	-1.20097	5.15345e-05	0.000333198					Cup000083g037529.1	Cup000019g018104.1
Cup000001g001217.1	1.11643	1.64587e-18	1.18708e-16			Cup000008g008305.1	-1.20007	6.3952e-09	1.02213e-07					Cup000014g014798.1	Cup000014g014688.1
Cup000023g020345.1	1.11598	3.47284e-09	5.84155e-08			Cup000011g011417.1	-1.19963	0.000459982	0.0022475					Cup000018g017530.1	Cup000017g016732.1
Cup000009g009352.1	1.11568	3.39358e-10	6.96306e-09			Cup000020g018885.1	-1.19858	1.39238e-13	4.9188e-12					Cup000031g024763.A	Cup000013g013106.1
Cup000004g004355.1	1.11553	2.06584e-07	2.37678e-06			Cup000001g001447.1	-1.19626	2.43887e-05	0.000170981					Cup000036g027211.A	Cup000032g025438.1
Cup000018g017062.1	1.11548	0.00085208	0.0038032			Cup000008g008082.1	-1.19534	2.84409e-07	3.17249e-06					Cup000014g014796.1	Cup000018g017568.A
Cup000025g021341.1	1.11502	2.68886e-12	7.80465e-11			Cup000023g020317.1	-1.19478	0.0024724	0.00950283					Cup000010g010288.1	Cup000013g013754.A
Cup000003g002870.1	1.11306	6.64636e-10	1.27961e-08			Cup000042g029693.1	-1.1941	1.42306e-05	0.000105434					Cup000010g010191.1	Cup000038g027706.1
Cup000021g019236.1	1.11304	9.51888e-13	2.99585e-11			Cup000008g008550.1	-1.19295	2.26758e-11	5.68117e-10					Cup000016g015937.1	Cup000186g043055.1
Cup000005g005912.A	1.1122	1.34309e-07	1.61044e-06			Cup000039g028395.1	-1.19229	5.20198e-08	6.94606e-07					Cup000124g040856.1	Cup000019g017930.1
Cup000075g036844.1	1.11093	6.58682e-23	7.79004e-21			Cup000024g021086.1	-1.1912	0.00172488	0.00697018					Cup000125g040880.1	Cup000062g034865.1
Cup000015g015102.1	1.10992	1.33247e-09	2.39129e-08			Cup000049g032027.1	-1.19095	6.66937e-07	6.87184e-06					Cup000010g010307.A	Cup000005g005223.1
Cup000011g011855.1	1.10686	0.000111912	0.000653653			Cup000138g041415.1	-1.19013	1.67637e-13	5.81415e-12					Cup000013g013120.1	Cup000073g036597.1
Cup000040g028604.1	1.10638	1.86102e-10	3.99501e-09			Cup000007g007051.1	-1.18852	0.0054716	0.0185448					Cup000022g019784.1	Cup000020g018496.1
Cup000002g001728.A	1.10434	3.47661e-05	0.000234413			Cup000003g003199.1	-1.18674	3.04588e-09	5.17364e-08					Cup000130g041062.1	Cup000050g032233.A
Cup000005g005011.1	1.10389	0.00270521	0.010265			Cup000051g032438.1	-1.18657	2.67203e-06	2.39314e-05					Cup000017g016805.1	Cup000026g021905.1
Cup000091g038341.1	1.10363	2.62276e-08	3.69926e-07			Cup000919g045377.1	-1.18632	0.000362695	0.00182496					Cup000011g012032.A	Cup000039g028425.1
Cup000006g006108.A	1.10339	6.55536e-13	2.10846e-11			Cup000003g003418.1	-1.1859	6.30142e-05	0.000396253					Cup000330g044227.1	Cup000011g011331.1
Cup000103g039600.1	1.10331	7.51133e-11	1.71696e-09			Cup000097g039194.1	-1.18573	0.00013001	0.000746088					Cup000015g015235.1	Cup000104g039797.A
Cup000024g021238.1	1.10234	0.00464082	0.0162437			Cup000001g000443.1	-1.18217	0.000360723	0.00181755					Cup000016g015589.1	Cup000003g002784.1
Cup000004g004466.1	1.10231	0.00229876	0.00892007			Cup000006g006040.1	-1.17853	8.93542e-07	8.97833e-06					Cup000058g034157.1	Cup000023g020451.1
Cup000001g001068.1	1.10198	7.61718e-14	2.77321e-12			Cup000007g007227.1	-1.17825	0.00270791	0.0102714					Cup000003g003416.A	Cup000046g031255.1
Cup000085g037773.1	1.10184	1.59784e-17	9.94261e-16			Cup000033g025613.1	-1.17821	0.00107552	0.0046448					Cup000044g030404.1	Cup000450g044601.1
Cup000002g002002.1	1.10136	0.000428559	0.00210912			Cup000011g011175.1	-1.17727	3.02011e-16	1.5712e-14					Cup000018g017487.1	Cup000002g002063.1
Cup000016g015594.1	1.10103	0.000676795	0.0031249			Cup000026g022258.1	-1.17718	1.72984e-06	1.63382e-05					Cup000097g039192.1	Cup000009g009255.1
Cup000009g009610.1	1.10101	5.51166e-20	4.46585e-18			Cup000063g035092.1	-1.17714	7.5047e-10	1.4304e-08					Cup000046g031095.1	Cup000003g002770.1
Cup000290g044057.A	1.10031	3.88809e-06	3.32733e-05			Cup000040g028768.1	-1.17503	0.00100544	0.00438591					Cup000034g026222.1	Cup000052g032754.1
Cup000025g021349.1	1.09937	2.72757e-09	4.66209e-08			Cup000176g042869.A	-1.17501	0.00110199	0.00474193					Cup000010g010661.1	Cup000001g001156.1
Cup000012g012661.1	1.0972	8.89892e-15	3.74877e-13			Cup000038g027694.1	-1.17496	8.11042e-13	2.57384e-11					Cup000033g025873.A	Cup000009g009219.1
Cup000030g024439.1	1.0964	2.02099e-06	1.86805e-05			Cup000032g025070.1	-1.17457	1.1575e-08	1.74921e-07					Cup000013g013388.1	Cup000005g005784.1
Cup000008g008534.1	1.09508	4.2443e-07	4.56586e-06			Cup000046g031310.1	-1.1744	0.00156568	0.00640261					Cup000094g038824.1	Cup000084g037621.1
Cup000091g038410.1	1.09366	1.22374e-12	3.75825e-11			Cup000044g030480.1	-1.17437	0.000971675	0.00425815					Cup000012g012429.1	Cup000008g008775.1
Cup000045g030848.1	1.09285	2.56259e-08	3.62513e-07			Cup000025g021637.1	-1.17419	1.75361e-06	1.653e-05					Cup000024g020641.A	Cup000008g008301.1
Cup000140g041470.1	1.09246	0.00363283	0.0132186			Cup000026g022253.1	-1.1735	6.61053e-13	2.12262e-11					Cup000021g019225.1	Cup000012g012311.1
Cup000159g042280.1	1.09239	8.79194e-12	2.35453e-10			Cup000024g021119.1	-1.17104	3.26436e-09	5.51523e-08					Cup000001g000763.1	Cup000005g005070.1
Cup000008g008759.1	1.09214	3.93072e-09	6.51958e-08			Cup000039g028221.1	-1.16867	1.22904e-13	4.36606e-12					Cup000011g012009.1	Cup000024g021121.1
Cup000100g039399.A	1.09176	0.000122822	0.000709115			Cup000001g001019.1	-1.16779	1.07321e-08	1.63089e-07					Cup000011g011218.1	Cup000021g019451.1
Cup000021g019106.1	1.0916	1.79886e-06	1.68896e-05			Cup000019g017932.1	-1.16586	2.25397e-17	1.37557e-15					Cup000172g042726.1	Cup000035g026605.1
Cup000013g013533.A	1.09006	5.64612e-06	4.64196e-05			Cup000107g040079.1	-1.16549	2.36376e-16	1.25722e-14					Cup000004g004498.1	Cup000092g038597.1
Cup000013g013015.1	1.08905	3.79611e-10	7.68649e-09			Cup000008g008344.A	-1.16485	4.17468e-05	0.000276103					Cup000033g025589.1	Cup000068g036007.1
Cup000022g019708.1	1.08901	0.00877094	0.0275726			Cup000039g028475.A	-1.16462	7.20665e-05	0.000445236					Cup000010g010970.1	Cup000003g002914.1
Cup000024g020661.1	1.08893	2.80869e-16	1.47329e-14			Cup000030g023938.1	-1.16423	2.98917e-11	7.33463e-10					Cup000008g008553.1	Cup000022g020063.1
Cup000040g028881.1	1.08868	2.85717e-08	4.00025e-07			Cup000001g000084.1	-1.16363	1.42985e-06	1.37504e-05					Cup000027g022516.1	Cup000133g041200.1
Cup000009g009218.1	1.08791	6.25665e-27	1.19133e-24			Cup000032g025188.1	-1.16266	1.91214e-11	4.84808e-10					Cup000033g025617.1	Cup000038g027777.1
Cup000147g041864.1	1.08791	3.5578e-05	0.000239463			Cup000052g032767.1	-1.16266	3.09736e-13	1.04199e-11					Cup000040g028767.1	Cup000006g006801.1
Cup000017g016300.1	1.08762	0.00560423	0.0189269			Cup000028g023187.1	-1.16068	8.0669e-13	2.56431e-11					Cup000026g021912.1	Cup000065g035401.1
Cup000086g037993.1	1.08527	5.78072e-15	2.48467e-13			Cup000007g007955.A	-1.16032	4.71041e-05	0.000307055					Cup000027g022731.1	Cup000055g033504.1
Cup000009g009742.1	1.08516	1.43555e-19	1.10219e-17			Cup000013g013055.1	-1.15877	1.52808e-11	3.97489e-10					Cup000055g033612.1	Cup000077g037077.1
Cup000010g010192.1	1.08506	9.31653e-05	0.000558552			Cup000011g011804.1	-1.15832	9.88697e-07	9.8102e-06					Cup000044g030203.1	Cup000041g029098.1
Cup000007g007106.1	1.08431	0.000276105	0.0014483			Cup000085g037809.1	-1.15795	1.54813e-07	1.83207e-06					Cup000031g024587.1	Cup000024g021020.1
Cup000057g033942.1	1.0841	7.18257e-14	2.61999e-12			Cup000438g044566.1	-1.15759	0.000464734	0.00226786					Cup000015g015226.1	Cup000006g006210.1
Cup000013g013076.1	1.08375	4.86085e-08	6.52259e-07			Cup000001g000047.1	-1.1571	6.20235e-08	8.12975e-07					Cup000169g042633.1	Cup000049g032078.1
Cup000102g039562.1	1.08337	2.05239e-15	9.32687e-14			Cup000046g031038.1	-1.15552	0.000501801	0.00241771					Cup000025g021718.1	Cup000001g000959.1
Cup000033g025894.1	1.08328	7.56847e-07	7.70237e-06			Cup000053g033054.1	-1.15446	1.43592e-17	9.04329e-16					Cup000041g028983.1	Cup000092g038672.1
Cup000043g030034.1	1.08291	2.19863e-15	9.94395e-14			Cup000006g006095.1	-1.15347	1.81976e-05	0.000131347					Cup000034g026394.1	Cup000010g010410.1
Cup000130g041048.A	1.08283	3.34327e-05	0.000226707			Cup000007g007775.1	-1.1531	1.71471e-07	2.01417e-06					Cup000047g031554.1	Cup000004g003650.1
Cup000010g010438.1	1.0821	1.04742e-08	1.59949e-07			Cup000001g000138.1	-1.15275	2.71212e-08	3.8132e-07					Cup000022g019775.1	Cup000035g026703.1
Cup000083g037456.1	1.08207	4.83993e-14	1.85166e-12			Cup000005g004886.1	-1.15055	9.85005e-06	7.60871e-05					Cup000001g000877.1	Cup000034g026171.1
Cup000055g033559.1	1.0799	4.3162e-18	2.92472e-16			Cup000007g007036.1	-1.15046	1.29318e-10	2.85987e-09					Cup000011g011213.1	Cup000062g034866.1
Cup000005g005557.1	1.07959	2.05896e-09	3.59017e-08			Cup000002g002266.1	-1.14952	6.74974e-05	0.000420006					Cup000052g032774.1	Cup000012g012773.1
Cup000009g009002.1	1.07889	4.32081e-10	8.66027e-09			Cup000041g029330.1	-1.14941	0.000192449	0.00105269					Cup000060g034349.1	Cup000088g038158.1
Cup000035g026675.1	1.07779	0.00839002	0.0265241			Cup000032g025397.1	-1.14851	6.36729e-10	1.23086e-08					Cup000133g041239.1	Cup000009g009113.1
Cup000114g040369.1	1.07721	8.01492e-06	6.34825e-05			Cup000004g003690.1	-1.14808	0.00431636	0.0152822					Cup000027g022540.1	Cup000028g022911.1
Cup000008g008062.1	1.07651	3.45713e-05	0.000233347			Cup000011g011379.A	-1.14752	0.00010213	0.000604495					Cup000281g044004.1	Cup000002g001563.A
Cup000042g029494.1	1.07569	4.39228e-11	1.05067e-09			Cup000144g041744.1	-1.14611	1.05369e-12	3.27632e-11					Cup000017g016652.1	Cup000017g016312.1
Cup000018g017539.1	1.07515	3.47088e-08	4.7995e-07			Cup000013g013220.1	-1.14605	1.58911e-08	2.34015e-07					Cup000062g034837.1	Cup000026g022052.1
Cup000021g019470.1	1.07327	3.93809e-06	3.36558e-05			Cup000006g006358.1	-1.14408	5.64117e-11	1.3212e-09					Cup000019g017805.1	Cup000003g003173.1
Cup000025g021319.1	1.07326	0.000247224	0.00131675			Cup000031g024579.1	-1.14284	9.48945e-08	1.18874e-06					Cup000015g015271.A	Cup000007g007107.1
Cup000038g028033.1	1.07278	0.00538811	0.0183369			Cup000016g015908.1	-1.14231	7.07165e-10	1.35447e-08					Cup000001g001090.A	Cup000018g017610.1
Cup000053g033039.1	1.07205	1.79816e-05	0.000130067			Cup000206g043377.1	-1.1422	0.00383444	0.0138437					Cup000038g028005.1	Cup000029g023721.1
Cup000040g028547.1	1.07184	4.67331e-07	4.98513e-06			Cup000018g017554.1	-1.1422	6.08862e-06	4.95442e-05					Cup000071g036298.1	Cup000020g018920.1
Cup000054g033297.1	1.07135	6.54534e-13	2.10846e-11			Cup000028g022886.1	-1.14151	0.00112234	0.00481427					Cup000051g032581.1	Cup000009g009744.1
Cup000017g016272.1	1.07039	3.70844e-13	1.23233e-11			Cup000045g030721.1	-1.14137	0.000365088	0.00183421					Cup000029g023383.1	Cup000058g034097.1
Cup000001g000414.1	1.07014	1.75827e-07	2.05899e-06			Cup000009g009827.1	-1.14133	1.14785e-12	3.55386e-11					Cup000252g043817.1	Cup000038g028140.1
Cup000186g043077.1	1.06768	7.05412e-08	9.10627e-07			Cup000026g021991.1	-1.14102	0.00713383	0.023113					Cup000003g002658.1	Cup000038g028022.1
Cup000008g008702.1	1.06708	2.131e-15	9.66102e-14			Cup000004g003696.1	-1.14067	8.78642e-05	0.000531287					Cup000007g007639.1	Cup000022g019742.1
Cup000024g021120.1	1.06688	9.89173e-08	1.23265e-06			Cup000032g025073.1	-1.14055	5.67458e-15	2.45011e-13					Cup000053g033172.1	Cup000012g012244.1
Cup000050g032273.1	1.06652	0.000261226	0.00138205			Cup000031g024708.1	-1.14011	1.84849e-07	2.15422e-06					Cup000102g039529.1	Cup000044g030209.1
Cup000057g033950.1	1.06529	1.00172e-14	4.18284e-13			Cup000010g010455.1	-1.13944	2.85161e-12	8.2519e-11					Cup000015g014938.1	Cup000033g025615.1
Cup000007g007591.1	1.06508	1.25351e-13	4.4447e-12			Cup000063g035082.1	-1.13938	3.26993e-13	1.09618e-11					Cup000022g020108.A	Cup000027g022597.A
Cup000005g005545.1	1.06477	1.64284e-11	4.23867e-10			Cup000002g001594.1	-1.13705	2.53202e-05	0.000176926					Cup000148g041900.1	Cup000020g018923.1
Cup000003g002945.1	1.06445	0.00106094	0.00458766			Cup000001g000136.1	-1.13602	1.34871e-10	2.97576e-09					Cup000046g031295.1	Cup000004g004258.1
Cup000077g036949.1	1.06258	5.28255e-05	0.000340044			Cup000022g019881.1	-1.13587	8.92542e-06	6.96898e-05					Cup000013g013329.1	Cup000028g023137.1
Cup000006g006245.1	1.0624	0.00103066	0.00448054			Cup000014g014218.1	-1.13475	0.000288194	0.00150343					Cup000025g021316.1	Cup000085g037848.1
Cup000083g037437.1	1.0609	0.00130783	0.00548995			Cup000006g006070.1	-1.13462	7.33297e-07	7.49877e-06					Cup000018g017184.1	Cup000024g021224.1
Cup000536g044819.1	1.06084	0.00183334	0.00733683			Cup000043g029869.A	-1.13355	0.00689712	0.0224877					Cup000016g015476.1	Cup000097g039124.1
Cup000018g017253.1	1.05986	1.45627e-12	4.43662e-11			Cup000026g021898.1	-1.13323	3.10258e-11	7.59334e-10					Cup000040g028603.1	Cup000024g020789.1
Cup000026g021924.1	1.05923	0.00132109	0.00553425			Cup000002g002142.1	-1.13319	3.95572e-12	1.12085e-10					Cup000028g023144.1	Cup008747g047006.A
Cup000038g027690.1	1.05922	0.00606613	0.0201823			Cup000013g013518.A	-1.12986	0.000802457	0.00361235					Cup000101g039491.1	Cup000045g030837.1
Cup000006g006639.1	1.05763	1.33238e-12	4.07219e-11			Cup000002g002445.A	-1.12972	0.00558446	0.0188769					Cup000138g041418.1	Cup000001g000809.1
Cup000003g003234.1	1.05659	1.87999e-07	2.18383e-06			Cup000028g022896.1	-1.12935	5.37543e-08	7.16762e-07					Cup000043g029861.1	Cup000009g009192.1
Cup000056g033800.1	1.05651	3.51907e-07	3.83483e-06			Cup000013g013680.1	-1.12915	0.0013944	0.00579837					Cup000150g041938.1	Cup000020g018936.1
Cup000003g002709.1	1.0562	2.76808e-12	8.02238e-11			Cup000271g043964.1	-1.12764	0.000384514	0.00191764					Cup000040g028536.1	Cup000147g041854.1
Cup000028g023231.1	1.05554	5.87742e-09	9.44405e-08			Cup000010g010419.1	-1.12729	1.78898e-05	0.000129472					Cup000042g029542.1	Cup000051g032445.1
Cup000013g013183.1	1.05546	1.24398e-06	1.21097e-05			Cup000014g014360.1	-1.12692	1.34879e-08	2.01114e-07					Cup000019g018051.1	Cup000027g022715.1
Cup000037g027272.1	1.05484	3.1969e-07	3.53497e-06			Cup000038g028061.1	-1.12575	6.65846e-05	0.000414868					Cup000009g009234.A	Cup000004g003715.1
Cup000017g016335.A	1.05428	4.68199e-14	1.80101e-12			Cup000070g036211.1	-1.12573	0.00219999	0.00857349					Cup000027g022589.1	Cup000093g038783.1
Cup000206g043382.1	1.05422	2.02961e-11	5.11865e-10			Cup000103g039612.1	-1.12456	3.65826e-08	5.03301e-07					Cup000038g027967.1	Cup000011g011748.1
Cup000050g032210.1	1.0535	1.14344e-14	4.69231e-13			Cup000029g023675.A	-1.12323	3.35591e-06	2.91647e-05					Cup000009g009003.1	Cup000014g014300.1
Cup000038g027722.1	1.05321	3.64655e-07	3.96087e-06			Cup000051g032676.A	-1.12008	0.000150042	0.000848766					Cup000005g005584.1	Cup000011g011381.1
Cup000046g031278.1	1.05275	1.41447e-05	0.000104879			Cup000024g020831.1	-1.11993	1.80634e-07	2.1088e-06					Cup000074g036749.1	Cup000017g016341.1
Cup000071g036370.1	1.05239	8.19823e-16	3.97207e-14			Cup000033g025929.1	-1.11942	0.0015092	0.00619857					Cup000007g007630.1	Cup000054g033241.1
Cup000016g015477.1	1.0512	8.89923e-08	1.12219e-06			Cup000011g011489.1	-1.11843	5.8264e-07	6.07228e-06					Cup000053g033063.1	Cup000066g035800.A
Cup000010g011061.A	1.051	9.5219e-19	6.97332e-17			Cup000010g010804.1	-1.11668	2.86804e-08	4.01252e-07					Cup000017g016437.1	Cup000017g016747.1
Cup000019g018136.1	1.04974	1.21423e-07	1.46982e-06			Cup000144g041712.1	-1.11585	1.99687e-09	3.48944e-08					Cup000020g018665.A	Cup000003g003139.1
Cup000044g030168.1	1.04971	1.08216e-20	9.81206e-19			Cup000067g035944.1	-1.11574	0.000200695	0.00109278					Cup000032g025349.1	Cup000065g035331.1
Cup000043g030031.1	1.04892	1.33973e-09	2.40205e-08			Cup000021g019165.1	-1.11495	0.000157594	0.000886224					Cup000016g015462.1	Cup000027g022775.1
Cup000007g007561.1	1.04802	4.46003e-06	3.75269e-05			Cup000022g019648.1	-1.11448	9.01017e-17	5.10603e-15					Cup000004g003723.1	Cup000010g010987.1
Cup000007g007229.1	1.04688	2.64059e-13	8.99452e-12			Cup000030g024036.1	-1.11446	6.54403e-10	1.26246e-08					Cup000107g039995.1	Cup000134g041299.1
Cup000013g013305.1	1.04678	7.54331e-08	9.67219e-07			Cup000026g021940.1	-1.11391	3.44345e-05	0.000232589					Cup000118g040573.1	Cup000008g008140.1
Cup000072g036497.1	1.04641	5.50909e-08	7.29983e-07			Cup000013g013656.1	-1.1132	2.9736e-17	1.77493e-15					Cup000130g041103.A	Cup000041g029217.1
Cup000004g004328.1	1.04598	2.02175e-11	5.10559e-10			Cup000161g042315.1	-1.11303	0.00557673	0.0188575					Cup000054g033245.1	Cup000064g035227.1
Cup000049g032065.1	1.04591	1.31573e-07	1.57963e-06			Cup000019g017810.1	-1.11287	5.31337e-10	1.04516e-08					Cup000030g023947.1	Cup000042g029672.1
Cup000030g024292.1	1.04575	3.20799e-15	1.42385e-13			Cup000032g025134.1	-1.11279	8.26827e-08	1.04888e-06					Cup000002g001743.1	Cup000013g013609.1
Cup000008g008109.1	1.04549	1.80149e-06	1.69059e-05			Cup000039g028277.1	-1.11162	6.34259e-05	0.000398316					Cup000008g008281.1	Cup000004g003691.A
Cup000001g000057.1	1.04496	7.46046e-08	9.57887e-07			Cup000007g007823.1	-1.11162	8.6093e-07	8.68271e-06					Cup000033g025587.1	Cup000029g023873.A
Cup000083g037529.1	1.04407	1.48326e-12	4.50444e-11			Cup000007g007683.1	-1.10995	4.88645e-09	7.98084e-08					Cup000039g028362.1	Cup000025g021426.1
Cup000014g014798.1	1.04367	4.84955e-16	2.47561e-14			Cup000006g006186.A	-1.1095	0.0065564	0.0215651					Cup000001g000852.1	Cup000027g022748.1
Cup000018g017530.1	1.04349	0.00241278	0.00930936			Cup000127g040936.1	-1.10854	5.91727e-06	4.83773e-05					Cup000101g039416.1	Cup000010g010932.1
Cup000031g024763.A	1.04323	2.05753e-12	6.07403e-11			Cup000004g003837.1	-1.10846	9.91753e-05	0.000589203					Cup000048g031690.1	Cup000005g005125.1
Cup000036g027211.A	1.04286	2.60188e-15	1.1657e-13			Cup000007g007813.1	-1.10799	0.00310434	0.011572					Cup000042g029455.1	Cup000004g004473.1
Cup000014g014796.1	1.04139	7.75631e-16	3.80639e-14			Cup000009g009816.1	-1.10769	7.67024e-08	9.81512e-07					Cup000030g024245.1	Cup000008g008701.1
Cup000010g010288.1	1.04127	2.33475e-09	4.04882e-08			Cup000018g017118.1	-1.10706	0.0044285	0.015626					Cup000005g005474.1	Cup000016g015464.A
Cup000010g010191.1	1.04039	2.02702e-06	1.8718e-05			Cup000039g028439.1	-1.10612	8.29942e-07	8.39688e-06					Cup000097g039111.1	Cup000040g028801.1
Cup000016g015937.1	1.03982	2.55603e-11	6.32893e-10			Cup000009g009705.1	-1.10598	1.2922e-06	1.25279e-05					Cup000020g018804.1	Cup000007g007324.1
Cup000124g040856.1	1.03801	1.39519e-08	2.0706e-07			Cup000007g007148.1	-1.10583	1.18346e-06	1.15857e-05					Cup000042g029649.1	Cup000016g016137.A
Cup000125g040880.1	1.03754	0.0108012	0.0327545			Cup000060g034346.1	-1.10549	4.65727e-06	3.90141e-05					Cup000007g007193.1	Cup000148g041881.1
Cup000038g027710.1	1.03703	0.00282252	0.0106465			Cup000005g005852.1	-1.10443	3.75723e-11	9.05588e-10					Cup000005g005524.1	Cup000051g032550.1
Cup000010g010307.A	1.0367	2.24609e-07	2.56248e-06			Cup000021g019117.1	-1.10441	0.00462317	0.0162042					Cup000047g031442.1	Cup000013g013139.1
Cup000013g013120.1	1.03635	3.54756e-06	3.06762e-05			Cup000016g015449.1	-1.10399	0.000465848	0.0022715					Cup000011g011770.1	Cup000043g030002.1
Cup000022g019784.1	1.03627	1.67794e-09	2.96655e-08			Cup000164g042450.1	-1.10298	1.43719e-14	5.81008e-13					Cup000079g037192.1	Cup000021g019479.1
Cup000130g041062.1	1.03522	1.02041e-12	3.1852e-11			Cup000009g009274.1	-1.10208	0.000687495	0.00316887					Cup000154g042127.1	Cup000040g028644.1
Cup000017g016805.1	1.03411	0.0051347	0.0176416			Cup000002g002053.A	-1.10193	2.74962e-16	1.44628e-14					Cup000045g030883.1	Cup000052g032809.1
Cup000011g012032.A	1.03369	2.03549e-07	2.34611e-06			Cup000020g018801.A	-1.10168	0.000129124	0.000742121					Cup000031g024716.1	Cup000065g035437.1
Cup000330g044227.1	1.03335	0.000253994	0.00134753			Cup000101g039487.1	-1.10076	0.00312294	0.0116345					Cup000125g040888.1	Cup000013g013060.1
Cup000015g015235.1	1.0331	2.73238e-08	3.83399e-07			Cup000061g034667.1	-1.10018	7.0144e-12	1.91075e-10					Cup000001g000398.1	Cup000056g033715.1
Cup000013g013000.1	1.03215	0.00613843	0.0203805			Cup000010g010456.1	-1.09904	2.68376e-12	7.80175e-11					Cup000604g044922.1	Cup000021g019200.1
Cup000016g015589.1	1.03186	0.00734948	0.0237068			Cup000011g011966.1	-1.09731	1.50144e-12	4.55236e-11					Cup000040g028616.1	Cup000023g020368.1
Cup000058g034157.1	1.0308	1.58272e-12	4.77601e-11			Cup000008g008125.1	-1.09673	1.0677e-08	1.62511e-07					Cup000032g025157.1	Cup000013g013892.1
Cup000003g003416.A	1.03071	0.00258506	0.00987998			Cup000011g011288.1	-1.09631	0.000110526	0.000646549					Cup000006g006635.1	Cup000020g018589.1
Cup000044g030404.1	1.03062	8.08813e-11	1.83998e-09			Cup000001g000139.1	-1.09593	3.82111e-06	3.2759e-05					Cup000017g016734.1	Cup000041g029309.1
Cup000018g017487.1	1.03039	4.99921e-07	5.29127e-06			Cup000011g011938.1	-1.09497	0.000275838	0.0014483					Cup000025g021372.1	Cup000076g036923.1
Cup000097g039192.1	1.03031	1.65495e-08	2.4296e-07			Cup000011g011226.1	-1.09481	0.000548305	0.00260356					Cup000085g037842.1	Cup000119g040597.A
Cup000046g031095.1	1.03012	4.82709e-06	4.02694e-05			Cup000043g030046.1	-1.0941	2.83107e-07	3.16166e-06					Cup000013g013224.1	Cup000035g026868.1
Cup000034g026222.1	1.02977	0.000299902	0.00155301			Cup000016g015644.1	-1.09392	3.32458e-06	2.89586e-05					Cup000028g023234.1	Cup000013g013727.1
Cup000010g010661.1	1.02906	6.33685e-20	5.06974e-18			Cup000040g028607.1	-1.09241	3.60869e-20	3.00057e-18					Cup000035g026630.1	Cup000005g005007.1
Cup000033g025873.A	1.02864	1.15873e-07	1.4107e-06			Cup000032g025343.A	-1.09143	0.00102181	0.00444917					Cup000006g006314.1	Cup000161g042352.1
Cup000013g013388.1	1.02864	6.08271e-16	3.04792e-14			Cup000029g023801.1	-1.09123	1.63572e-13	5.69391e-12					Cup000023g020272.1	Cup000035g026546.1
Cup000094g038824.1	1.02835	5.56597e-07	5.82637e-06			Cup000016g015970.1	-1.09089	3.89987e-13	1.29143e-11					Cup000085g037838.1	Cup000006g006583.1
Cup000012g012429.1	1.02817	0.000108241	0.000635529			Cup000088g038150.1	-1.0902	4.62789e-11	1.10149e-09					Cup000001g001136.1	Cup000003g002613.A
Cup000024g020641.A	1.02809	6.29352e-10	1.21907e-08			Cup000069g036160.1	-1.08969	6.18543e-14	2.29584e-12					Cup000038g027833.A	Cup000014g014780.1
Cup000021g019225.1	1.02719	3.18887e-10	6.57847e-09			Cup000093g038782.1	-1.08944	0.000291117	0.001517					Cup000006g006065.1	Cup000014g014209.1
Cup000016g015505.1	1.02704	0.000485402	0.00235539			Cup000003g003128.1	-1.08775	0.000394109	0.00195678					Cup000106g039942.1	Cup000003g003154.A
Cup000001g000763.1	1.02703	1.40864e-09	2.51377e-08			Cup000035g026850.1	-1.08723	9.41952e-06	7.31771e-05					Cup000039g028216.A	Cup000008g008374.A
Cup000011g012009.1	1.02567	3.47125e-14	1.34615e-12			Cup000094g038851.A	-1.08704	0.00544167	0.0184795					Cup000002g001516.1	Cup000008g008203.1
Cup000011g011218.1	1.02537	1.13447e-11	3.00134e-10			Cup000024g020783.1	-1.08632	1.02736e-07	1.27109e-06					Cup000008g008110.1	Cup000004g003664.1
Cup000024g020900.A	1.02512	0.0167944	0.0467587			Cup000265g043891.1	-1.0862	1.04975e-14	4.34528e-13					Cup000061g034666.1	Cup000020g018792.1
Cup000172g042726.1	1.02475	0.00211569	0.00829117			Cup000031g024840.1	-1.08476	7.20096e-07	7.37963e-06					Cup000053g033140.1	Cup000032g025441.1
Cup000004g004498.1	1.02413	0.000172893	0.00095755			Cup000083g037560.1	-1.08219	8.7978e-05	0.000531806					Cup000010g010310.1	Cup000016g015894.1
Cup000033g025589.1	1.02406	1.62113e-16	8.74447e-15			Cup000026g022079.1	-1.07959	7.353e-06	5.88271e-05					Cup000056g033865.1	Cup000144g041756.A
Cup000010g010970.1	1.02396	8.28518e-09	1.29204e-07			Cup000022g019647.1	-1.07749	2.06003e-21	2.04297e-19					Cup000122g040787.1	Cup000001g000795.1
Cup000061g034749.1	1.02371	0.004452	0.0156898			Cup000028g023244.1	-1.07665	1.77688e-05	0.000128694					Cup000030g024384.A	Cup000008g008555.1
Cup000008g008553.1	1.02358	1.78101e-06	1.67468e-05			Cup000042g029508.1	-1.07552	1.46915e-09	2.6193e-08					Cup000038g027655.1	Cup000037g027520.1
Cup000027g022516.1	1.02305	4.79773e-20	3.93765e-18			Cup000006g006209.1	-1.07456	0.000166676	0.000928517					Cup000047g031509.A	Cup000022g019611.1
Cup000033g025617.1	1.02273	0.00880283	0.0276592			Cup000028g023017.1	-1.07222	0.00123401	0.00521907					Cup000001g001143.1	Cup000092g038534.1
Cup000040g028767.1	1.02218	0.00259879	0.00992253			Cup000032g025098.1	-1.07189	4.72333e-10	9.41748e-09					Cup000041g029314.1	Cup000025g021453.1
Cup000054g033394.1	1.022	0.00126619	0.00533513			Cup000104g039852.A	-1.07047	0.000107309	0.000630642					Cup000027g022561.1	Cup000539g044833.1
Cup000026g021912.1	1.02189	4.3156e-10	8.65895e-09			Cup000029g023755.1	-1.0704	2.66795e-14	1.05177e-12					Cup000074g036743.1	Cup000035g026961.1
Cup000027g022731.1	1.02184	2.38619e-06	2.15538e-05			Cup000049g032117.1	-1.07013	0.00102727	0.00446888					Cup000050g032231.1	Cup000649g045008.1
Cup000055g033612.1	1.02179	2.5638e-18	1.80138e-16			Cup000032g025331.1	-1.06939	2.42084e-05	0.000169891					Cup000009g009656.1	Cup000006g006138.1
Cup000044g030203.1	1.02097	6.70396e-09	1.06731e-07			Cup000003g003138.1	-1.06815	1.96584e-07	2.27236e-06					Cup000001g000850.1	Cup000032g025106.1
Cup000031g024587.1	1.02096	3.49756e-08	4.83287e-07			Cup000041g028978.1	-1.0681	0.000315766	0.001625					Cup000022g019736.1	Cup000037g027501.1
Cup000015g015226.1	1.02093	6.84503e-17	3.914e-15			Cup000055g033470.1	-1.06762	2.71981e-06	2.43364e-05					Cup000102g039557.1	Cup000035g026699.1
Cup000169g042633.1	1.02076	2.77798e-05	0.000192068			Cup000092g038571.1	-1.06691	1.62749e-08	2.39483e-07					Cup000089g038197.1	Cup000037g027603.1
Cup000025g021718.1	1.02034	3.6537e-06	3.15224e-05			Cup000017g016830.1	-1.0666	5.30744e-05	0.000341531					Cup000051g032399.1	Cup000024g020762.1
Cup000035g026539.1	1.01933	0.00604056	0.0201154			Cup000043g030012.A	-1.0663	0.0103507	0.0316453					Cup000094g038829.1	Cup000034g026424.1
Cup000041g028983.1	1.01919	2.76265e-06	2.46387e-05			Cup000026g022212.1	-1.06605	0.00198227	0.00785197					Cup000038g027671.1	Cup000005g005037.1
Cup000034g026394.1	1.01832	5.33268e-13	1.73276e-11			Cup000008g008875.1	-1.06473	4.09331e-09	6.77745e-08					Cup000021g019578.1	Cup000013g013863.1
Cup000047g031554.1	1.01816	4.97771e-14	1.89561e-12			Cup000001g001133.1	-1.06452	6.24688e-06	5.07453e-05					Cup000021g019258.A	Cup000062g034850.1
Cup000022g019775.1	1.0173	1.39457e-16	7.63047e-15			Cup000011g011812.A	-1.06428	7.7741e-07	7.90319e-06					Cup000004g003868.1	Cup000032g025355.1
Cup000001g000877.1	1.01639	5.73745e-11	1.33881e-09			Cup000042g029670.A	-1.06426	5.88822e-06	4.81605e-05					Cup000035g026968.1	Cup000153g042101.1
Cup000011g011213.1	1.01611	8.9208e-16	4.28942e-14			Cup000015g015054.1	-1.06425	4.03829e-06	3.43733e-05					Cup000046g031321.1	Cup000100g039386.1
Cup000052g032774.1	1.01601	1.0717e-14	4.42651e-13			Cup000051g032607.1	-1.0631	1.11236e-06	1.09516e-05					Cup000024g020706.1	Cup000003g002707.1
Cup000015g015219.1	1.01511	0.00582701	0.0195304			Cup000017g016964.1	-1.063	3.25721e-06	2.84237e-05					Cup000040g028645.1	Cup000026g022036.1
Cup000060g034349.1	1.01503	4.09137e-17	2.40443e-15			Cup000104g039724.1	-1.06239	1.58825e-11	4.10894e-10					Cup000175g042805.1	Cup000065g035340.1
Cup000133g041239.1	1.01462	2.2452e-08	3.22161e-07			Cup000134g041266.A	-1.06074	1.61093e-05	0.000117885					Cup000053g033155.1	Cup000020g018468.A
Cup000027g022540.1	1.01442	4.27845e-07	4.6e-06			Cup000049g032131.1	-1.06073	0.00692757	0.0225677					Cup000041g029132.1	Cup000001g000914.1
Cup000281g044004.1	1.01378	0.000939358	0.00413652			Cup000038g027743.1	-1.0605	3.81278e-12	1.08681e-10					Cup000008g008263.1	Cup000009g009194.1
Cup000017g016652.1	1.01314	0.0104945	0.0320029			Cup000034g026230.1	-1.0603	0.00491051	0.0170112					Cup000026g022384.1	Cup000004g004392.1
Cup000062g034837.1	1.013	5.01257e-05	0.000325637			Cup000066g035678.A	-1.05939	0.0043015	0.0152381					Cup000004g004507.1	Cup000006g006669.1
Cup000019g017805.1	1.01298	0.00122356	0.00518653			Cup000012g012705.1	-1.05927	3.29886e-19	2.47297e-17					Cup000033g025582.A	Cup000065g035314.1
Cup000015g015271.A	1.01215	1.28007e-11	3.37121e-10			Cup000003g003435.A	-1.05803	1.97775e-10	4.21706e-09					Cup000011g012007.1	Cup000002g002233.1
Cup000001g001090.A	1.01154	4.86656e-14	1.857e-12			Cup000092g038613.1	-1.05787	0.000376549	0.00188378					Cup000161g042345.1	Cup000002g001599.1
Cup000038g028005.1	1.01152	7.5194e-09	1.18285e-07			Cup000089g038237.1	-1.05748	2.87698e-10	5.9739e-09					Cup000043g030136.1	Cup000016g015840.1
Cup000071g036298.1	1.0113	1.44381e-17	9.04329e-16			Cup000020g018475.1	-1.05748	5.77844e-05	0.000367248					Cup000040g028507.1	Cup000043g030006.1
Cup000051g032581.1	1.01125	9.72519e-07	9.66983e-06			Cup000007g007732.1	-1.05741	0.000159587	0.000895315					Cup000079g037176.1	Cup000321g044180.1
Cup000029g023383.1	1.01118	0.000161097	0.000902193			Cup000029g023465.1	-1.05717	8.04279e-08	1.023e-06					Cup000076g036921.1	Cup000042g029737.1
Cup000063g035080.1	1.00982	7.91914e-05	0.000484694			Cup000005g005979.A	-1.05684	1.3692e-05	0.00010184					Cup000010g010259.1	Cup000160g042295.1
Cup000252g043817.1	1.00741	3.39196e-06	2.94511e-05			Cup006874g046891.1	-1.05659	0.00380678	0.0137542					Cup000054g033404.1	Cup000019g018316.1
Cup000003g002658.1	1.00737	2.50698e-10	5.22841e-09			Cup000013g013621.1	-1.05652	1.54207e-14	6.19464e-13					Cup000013g013007.1	Cup000017g016918.1
Cup000007g007639.1	1.00732	1.07605e-16	6.02622e-15			Cup000012g012352.A	-1.05633	2.65153e-07	2.97511e-06					Cup000061g034740.1	Cup000101g039485.1
Cup000053g033172.1	1.00665	1.56834e-11	4.06296e-10			Cup000009g009637.1	-1.056	3.13106e-23	3.89664e-21					Cup000004g004297.1	Cup000029g023447.1
Cup000102g039529.1	1.00636	3.42315e-07	3.7503e-06			Cup000032g025389.1	-1.05585	0.000144345	0.000819463					Cup000141g041546.1	Cup000025g021332.1
Cup000011g011995.1	1.00628	0.00803725	0.0255531			Cup000086g037907.1	-1.05496	1.37329e-07	1.63942e-06					Cup000022g019812.1	Cup000030g024344.1
Cup000015g014938.1	1.00618	1.7182e-07	2.01704e-06			Cup000013g013423.1	-1.05486	1.35536e-06	1.30869e-05					Cup000004g004269.1	Cup000026g021931.1
Cup000022g020108.A	1.0055	1.46347e-16	7.96168e-15			Cup000022g020123.A	-1.05369	6.27117e-08	8.20682e-07					Cup000083g037563.1	Cup000132g041172.1
Cup000148g041900.1	1.00473	0.00443524	0.0156449			Cup000105g039870.1	-1.05306	0.00165244	0.00670875					Cup000013g013074.1	Cup000016g015827.A
Cup000046g031295.1	1.00403	2.49753e-16	1.32099e-14			Cup000008g008175.1	-1.05222	0.00535467	0.0182394					Cup000265g043897.1	Cup000013g013110.1
Cup000013g013329.1	1.00388	1.10367e-17	7.09965e-16			Cup000003g002889.1	-1.051	5.51244e-06	4.5399e-05					Cup000038g027997.1	Cup000028g023042.1
Cup000025g021316.1	1.00342	1.99753e-09	3.48944e-08			Cup000006g006828.1	-1.04966	6.99274e-10	1.34223e-08					Cup000164g042443.1	Cup000004g004737.1
Cup000018g017184.1	1.00292	3.63383e-15	1.60166e-13			Cup000021g019490.1	-1.04964	2.77582e-05	0.000191988					Cup000023g020301.1	Cup000030g024062.1
Cup000551g044850.1	1.00285	5.03714e-05	0.000327011			Cup000032g025452.1	-1.04863	2.86208e-09	4.88761e-08					Cup000011g011951.1	Cup000026g021950.1
Cup000016g015476.1	1.00209	0.00249714	0.0095805			Cup000062g034958.1	-1.04847	0.000752326	0.0034295					Cup000015g015062.1	Cup000001g000259.1
Cup000040g028603.1	1.00197	0.000271207	0.00142732			Cup000089g038214.1	-1.04818	1.72646e-09	3.04949e-08					Cup000002g002257.1	Cup000054g033306.1
Cup000028g023144.1	1.00184	0.00050567	0.00243393			Cup000010g010741.1	-1.04791	1.39743e-11	3.66003e-10					Cup000027g022689.1	Cup000032g025395.1
Cup000101g039491.1	1.00128	7.20952e-08	9.2817e-07			Cup000032g025333.1	-1.04769	0.000854948	0.00381332					Cup000055g033459.1	Cup000024g021073.1
Cup000138g041418.1	1.00076	2.35778e-07	2.6707e-06			Cup000014g014594.1	-1.04714	0.00102325	0.0044534					Cup000017g016659.1	Cup000159g042277.1
Cup000043g029861.1	1.00062	0.000499462	0.00240905			Cup000009g009069.1	-1.047	0.004911	0.0170112					Cup000020g018550.1	Cup000005g005108.A
Cup000025g021621.1	1.00032	8.96532e-05	0.000540731			Cup000019g018137.1	-1.04619	0.000527259	0.00251997					Cup000016g015601.1	Cup000173g042767.1
Cup000150g041938.1	0.999579	1.35124e-15	6.30613e-14			Cup000037g027529.1	-1.0461	1.28933e-06	1.25128e-05					Cup000019g018266.1	Cup000172g042742.1
Cup000040g028536.1	0.998927	1.22192e-07	1.47818e-06			Cup000071g036367.1	-1.04589	4.3714e-08	5.94114e-07					Cup000005g005965.A	Cup000001g000395.1
Cup000042g029542.1	0.998883	5.58139e-05	0.000356743			Cup000079g037190.1	-1.04497	0.000541656	0.00257648					Cup000062g034858.A	Cup000083g037522.1
Cup000019g018051.1	0.998435	0.000933725	0.00411457			Cup000130g041064.1	-1.04313	0.000782715	0.00354259					Cup000053g033168.1	Cup000004g003685.1
Cup000027g022727.1	0.998422	0.00460087	0.0161454			Cup000006g006748.1	-1.0428	0.00196428	0.00778883					Cup000070g036210.1	Cup000014g014782.1
Cup000009g009234.A	0.998344	3.51776e-08	4.85727e-07			Cup000031g024611.1	-1.04253	0.00349052	0.0127764					Cup000101g039431.1	Cup000172g042751.1
Cup000027g022589.1	0.998128	1.32604e-10	2.92913e-09			Cup000024g020798.1	-1.04097	1.70911e-07	2.00883e-06					Cup000009g009051.1	Cup000002g001692.1
Cup000038g027967.1	0.997591	7.85061e-05	0.000481118			Cup000706g045093.A	-1.04094	0.000131036	0.000751522					Cup000022g019721.A	Cup000017g016945.A
Cup000009g009003.1	0.996905	2.6597e-06	2.38333e-05			Cup000022g019636.1	-1.04079	2.48523e-05	0.000173912					Cup000161g042349.1	Cup000237g043681.1
Cup000057g034030.1	0.995998	0.00181982	0.00729497			Cup000003g003213.1	-1.04037	1.71746e-20	1.52103e-18					Cup000039g028377.1	Cup000032g025190.1
Cup000005g005584.1	0.995988	1.8861e-06	1.76131e-05			Cup000033g025916.1	-1.03998	3.92122e-05	0.000260789					Cup000161g042348.1	Cup000004g004586.1
Cup000074g036749.1	0.995726	1.5263e-19	1.15786e-17			Cup000006g006303.1	-1.03956	0.000117475	0.000681549					Cup000038g027624.1	Cup000080g037261.1
Cup000007g007630.1	0.995523	6.59806e-09	1.05221e-07			Cup000003g002864.A	-1.03943	0.000334145	0.00170712					Cup000180g042919.1	Cup000032g025205.1
Cup000053g033063.1	0.995073	1.88093e-07	2.18383e-06			Cup000064g035154.1	-1.03938	0.0127478	0.0374119					Cup000008g008231.1	Cup000004g004301.A
Cup000017g016437.1	0.995	4.09951e-06	3.48321e-05			Cup000020g018426.1	-1.03641	1.59761e-13	5.57145e-12					Cup000044g030178.1	Cup000010g010194.1
Cup000020g018665.A	0.994689	2.63286e-12	7.66549e-11			Cup000026g022390.1	-1.03602	3.08179e-08	4.28011e-07					Cup000022g020118.1	Cup000019g017890.1
Cup000032g025349.1	0.994029	0.00345047	0.0126542			Cup000013g013123.1	-1.03579	2.11583e-07	2.42696e-06					Cup000017g016461.1	Cup000018g017507.1
Cup000016g015462.1	0.992562	2.8835e-10	5.98091e-09			Cup000064g035159.1	-1.03522	0.0168838	0.0469663					Cup000012g012221.1	Cup000021g019394.1
Cup000004g003723.1	0.992398	1.8529e-07	2.15654e-06			Cup000065g035438.1	-1.03371	4.43059e-11	1.05718e-09					Cup000021g019141.1	Cup000035g026902.1
Cup000107g039995.1	0.991195	9.98527e-16	4.76515e-14			Cup000019g018275.1	-1.03331	1.63963e-08	2.41082e-07					Cup000063g035041.1	Cup000042g029558.1
Cup000002g001583.1	0.990889	0.00674365	0.0220849			Cup000024g021113.1	-1.03313	1.20532e-12	3.70766e-11					Cup000023g020491.1	Cup000011g011418.1
Cup000118g040573.1	0.990718	0.00034268	0.00174185			Cup000008g008530.1	-1.03293	2.50915e-13	8.57752e-12					Cup000063g035102.1	Cup000008g008566.1
Cup000130g041103.A	0.989974	0.002024	0.00798901			Cup000006g006611.1	-1.03279	5.94219e-05	0.000376273					Cup000012g012685.1	Cup000029g023782.1
Cup000054g033245.1	0.98996	5.50865e-09	8.87396e-08			Cup000032g025361.1	-1.03266	6.30813e-05	0.000396544					Cup000021g019376.1	Cup000011g011962.1
Cup000030g023947.1	0.989467	3.97856e-05	0.000263958			Cup000032g025083.1	-1.03205	1.07102e-05	8.17695e-05					Cup000026g022306.1	Cup000047g031438.1
Cup000002g001743.1	0.988799	0.000185089	0.00101681			Cup000031g024578.1	-1.02991	7.99917e-12	2.1513e-10					Cup000005g005694.1	Cup000098g039269.1
Cup000008g008281.1	0.988453	8.73633e-06	6.8428e-05			Cup000011g011930.1	-1.02938	0.00938299	0.0291407					Cup000044g030368.1	Cup000020g018604.1
Cup000033g025587.1	0.988102	0.000637682	0.00297018			Cup000018g017161.1	-1.02869	0.000112316	0.000655815					Cup000065g035450.1	Cup000046g031303.1
Cup000039g028362.1	0.988057	0.00331362	0.0122358			Cup000018g017258.1	-1.02685	5.08635e-10	1.00675e-08					Cup000044g030489.1	Cup000013g013118.1
Cup000001g000852.1	0.988042	0.000451918	0.00221216			Cup000133g041202.1	-1.02623	0.00832476	0.0263571					Cup000073g036585.1	Cup000006g006274.A
Cup000101g039416.1	0.988009	1.95954e-07	2.26775e-06			Cup000010g010372.A	-1.02595	0.000218586	0.00118107					Cup000041g029083.1	Cup000021g019454.1
Cup000048g031690.1	0.987954	5.82108e-10	1.13565e-08			Cup000024g020824.1	-1.02542	1.26636e-07	1.52323e-06					Cup000002g002422.1	Cup000004g004293.1
Cup000042g029455.1	0.987606	9.66877e-08	1.20882e-06			Cup000014g014589.A	-1.02481	0.000392878	0.00195168					Cup000032g025088.1	Cup000013g013731.A
Cup000030g024245.1	0.987192	1.3277e-11	3.49181e-10			Cup000022g019642.1	-1.02465	3.56758e-05	0.000240036					Cup000009g009120.1	Cup000086g037931.1
Cup000005g005474.1	0.987038	2.17144e-06	1.98395e-05			Cup000037g027473.1	-1.02464	0.00290149	0.0109098					Cup000032g025310.1	Cup000022g019635.A
Cup000033g025938.1	0.986848	0.0128284	0.0375678			Cup000072g036498.1	-1.02358	1.36397e-07	1.63034e-06					Cup000002g002286.1	Cup000048g031735.1
Cup000097g039111.1	0.986431	0.000154226	0.000869335			Cup000083g037426.1	-1.02233	0.00143768	0.00595106					Cup000019g018291.1	Cup000032g025380.1
Cup000020g018804.1	0.986207	1.25041e-07	1.50785e-06			Cup000002g002312.1	-1.02041	1.1973e-09	2.1837e-08					Cup000014g014132.1	Cup000032g025426.1
Cup000042g029649.1	0.986145	0.000167038	0.00092972			Cup000025g021613.1	-1.01985	5.20439e-05	0.000336149					Cup000034g026372.1	Cup000001g000721.A
Cup000045g030906.1	0.985861	0.000720019	0.00329485			Cup000027g022605.1	-1.01968	9.80639e-06	7.57806e-05					Cup000001g000215.1	Cup000014g014277.1
Cup000007g007193.1	0.985556	1.40136e-19	1.08029e-17			Cup000013g013879.1	-1.0195	0.000657498	0.00304831					Cup000007g007078.1	Cup000026g022331.1
Cup000038g027903.1	0.985459	0.0182495	0.0498897			Cup000037g027347.1	-1.01923	0.00623931	0.0206567					Cup000022g019614.1	Cup000056g033735.1
Cup000005g005524.1	0.985166	0.000146355	0.000829637			Cup000004g004336.1	-1.01866	0.00404721	0.0144638					Cup000038g027892.1	Cup000018g017222.1
Cup000047g031442.1	0.984899	1.15835e-09	2.11874e-08			Cup000005g005014.1	-1.01786	2.79549e-05	0.000193138					Cup000066g035589.1	Cup000069g036152.1
Cup000011g011770.1	0.984599	6.75465e-14	2.47814e-12			Cup000005g005713.1	-1.01758	3.05392e-06	2.68962e-05					Cup000041g028967.1	Cup000064g035223.1
Cup000079g037192.1	0.98393	2.08484e-07	2.39719e-06			Cup000008g008178.A	-1.01686	8.50483e-05	0.000516227					Cup000005g005094.1	Cup000086g037988.1
Cup000154g042127.1	0.983507	5.50916e-24	7.33566e-22			Cup000003g002601.1	-1.01652	0.00185443	0.007401					Cup000010g010338.1	Cup000085g037769.1
Cup000045g030883.1	0.983437	2.38211e-08	3.40268e-07			Cup000001g001212.1	-1.01641	0.00462529	0.0162042					Cup000107g040145.1	Cup000025g021710.1
Cup000031g024716.1	0.982024	1.38401e-15	6.43155e-14			Cup000014g014116.1	-1.01597	0.00350879	0.012831					Cup000087g038086.1	Cup000059g034267.1
Cup000125g040888.1	0.981873	3.60964e-12	1.03045e-10			Cup000055g033544.1	-1.01565	1.46397e-06	1.40501e-05					Cup000037g027438.1	Cup000070g036208.1
Cup000003g002930.1	0.981494	0.00349526	0.0127889			Cup000016g015875.1	-1.01563	0.00472278	0.0164756					Cup000004g004241.A	Cup000017g016247.1
Cup000001g000398.1	0.981293	1.53055e-09	2.72112e-08			Cup000030g023984.1	-1.01556	0.00068898	0.00317264					Cup000002g001729.A	Cup000027g022513.1
Cup000064g035272.1	0.981183	0.00894328	0.0280311			Cup000035g026883.1	-1.01537	4.96112e-09	8.0739e-08					Cup000058g034128.1	Cup000012g012680.1
Cup000604g044922.1	0.97988	3.96033e-18	2.71047e-16			Cup000004g004651.1	-1.01537	2.35261e-09	4.06988e-08					Cup000020g018771.1	Cup000011g011378.1
Cup000040g028616.1	0.97965	5.44695e-07	5.71435e-06			Cup000018g017196.1	-1.01507	1.79098e-07	2.09343e-06					Cup000028g022978.1	Cup000011g011440.A
Cup000032g025157.1	0.979283	3.94076e-08	5.39827e-07			Cup000010g010216.1	-1.01472	1.69902e-08	2.48472e-07					Cup000009g009757.1	Cup000011g011766.1
Cup000006g006635.1	0.979282	0.000333496	0.00170427			Cup000004g003793.1	-1.01466	0.000275935	0.0014483					Cup000061g034747.1	Cup000049g032091.1
Cup000017g016734.1	0.979028	3.42535e-20	2.86061e-18			Cup000005g005722.1	-1.01461	3.9278e-05	0.000261002					Cup000010g010156.1	Cup000005g005170.1
Cup000025g021372.1	0.97887	4.92938e-09	8.03599e-08			Cup000106g039947.1	-1.01319	1.18042e-06	1.15619e-05					Cup000457g044621.1	Cup000018g017560.1
Cup000085g037842.1	0.978798	2.15139e-18	1.52285e-16			Cup000004g003670.1	-1.01318	2.03454e-10	4.33329e-09					Cup000008g008270.1	Cup000017g016788.1
Cup000013g013224.1	0.978775	4.84285e-14	1.85166e-12			Cup000169g042608.1	-1.01314	0.00330745	0.0122215					Cup000018g017564.1	Cup000023g020330.1
Cup000028g023234.1	0.978009	8.40789e-05	0.000511158			Cup000003g002912.1	-1.01235	4.23185e-08	5.75562e-07					Cup000055g033603.A	Cup000109g040211.1
Cup000035g026630.1	0.977736	1.16354e-08	1.75693e-07			Cup000044g030451.1	-1.01098	0.00334284	0.0123164					Cup000011g011198.1	Cup000034g026414.1
Cup000006g006314.1	0.977071	5.05162e-05	0.000327727			Cup000013g013790.1	-1.01088	2.57143e-05	0.000179219					Cup000004g003779.1	Cup000001g000438.1
Cup000023g020272.1	0.976812	7.35488e-09	1.15931e-07			Cup000014g014715.1	-1.00942	0.000126636	0.000729805					Cup000009g009850.1	Cup000004g004550.1
Cup000085g037838.1	0.976336	3.56848e-07	3.88271e-06			Cup000004g004413.1	-1.00802	2.50208e-07	2.81573e-06					Cup000041g029344.1	Cup000002g001511.1
Cup000001g001136.1	0.976178	1.01151e-10	2.27124e-09			Cup000018g017470.1	-1.00768	5.1829e-06	4.29076e-05					Cup000009g009781.1	Cup000146g041799.1
Cup000038g027833.A	0.975841	0.00576385	0.019363			Cup000051g032616.1	-1.00748	0.00387946	0.013969					Cup000071g036299.1	Cup000007g007097.1
Cup000006g006065.1	0.975687	0.00155875	0.00638008			Cup000018g017164.A	-1.00712	1.79751e-09	3.16326e-08					Cup000066g035561.1	Cup000030g024032.1
Cup000106g039942.1	0.975093	8.56391e-16	4.13872e-14			Cup000028g022862.1	-1.00488	2.22757e-13	7.65616e-12					Cup000002g001653.1	Cup000024g020811.1
Cup000039g028216.A	0.974423	0.00308467	0.0115122			Cup000044g030372.A	-1.00479	0.00235922	0.00913046					Cup000083g037472.1	Cup000062g034820.1
Cup000002g001516.1	0.974176	5.07964e-08	6.79701e-07			Cup000084g037633.1	-1.00381	1.04475e-09	1.92949e-08					Cup000031g024830.1	Cup000022g019988.1
Cup000008g008110.1	0.97383	8.99995e-05	0.000542476			Cup000159g042284.A	-1.0038	0.000775577	0.00351446					Cup000038g027934.1	Cup000030g024362.1
Cup000061g034666.1	0.973442	2.19587e-05	0.000155433			Cup000008g008235.1	-1.00258	0.00090503	0.00400481					Cup000009g009353.1	Cup000021g019221.1
Cup000053g033140.1	0.972825	6.44346e-10	1.24432e-08			Cup000052g032929.1	-1.00069	9.78628e-06	7.56812e-05					Cup000016g015435.1	Cup000004g004420.1
Cup000013g013643.A	0.972773	0.000489801	0.0023725			Cup000033g025668.1	-1.00011	0.0011105	0.00477205					Cup000069g036052.1	Cup000001g000266.1
Cup000010g010310.1	0.972742	2.24077e-06	2.03781e-05			Cup000093g038685.1	-0.999784	9.12142e-05	0.000548928					Cup000006g006312.1	Cup000022g020104.1
Cup000056g033865.1	0.972491	1.11372e-06	1.09593e-05			Cup000019g018104.1	-0.999579	3.3455e-05	0.000226777					Cup000018g017156.1	Cup000002g001747.1
Cup000122g040787.1	0.971795	1.62335e-15	7.48433e-14			Cup000014g014688.1	-0.998745	3.2798e-08	4.54517e-07					Cup000019g017756.1	Cup000226g043612.1
Cup000030g024384.A	0.971625	4.15769e-09	6.86987e-08			Cup000017g016732.1	-0.998566	5.2401e-09	8.48441e-08					Cup000012g012256.1	Cup000013g013620.1
Cup000017g016801.1	0.971185	0.00495956	0.0171451			Cup000013g013106.1	-0.997772	5.33468e-07	5.60596e-06					Cup000022g019954.1	Cup000033g025699.1
Cup000038g027655.1	0.971072	1.9724e-09	3.45188e-08			Cup000032g025438.1	-0.997653	9.43049e-06	7.32026e-05					Cup000038g027912.1	Cup000005g005256.A
Cup000047g031509.A	0.970869	1.08536e-05	8.27312e-05			Cup000018g017568.A	-0.997275	9.70256e-06	7.51307e-05					Cup000020g018447.1	Cup000035g026700.1
Cup000001g001143.1	0.969483	1.26503e-07	1.52276e-06			Cup000066g035605.1	-0.996541	8.31472e-05	0.000506464					Cup000010g010258.1	Cup000010g010487.1
Cup000041g029314.1	0.969404	5.45495e-05	0.000350194			Cup000013g013754.A	-0.995945	0.0102403	0.0313431					Cup000047g031512.1	Cup000002g002242.A
Cup000027g022561.1	0.968047	6.94917e-09	1.10212e-07			Cup000038g027706.1	-0.995467	0.000512736	0.00246292					Cup000023g020501.1	Cup000026g021900.1
Cup000074g036743.1	0.96742	0.000574733	0.00271416			Cup000091g038459.1	-0.995359	0.0182786	0.0499344					Cup000010g010383.1	Cup000104g039760.1
Cup000050g032231.1	0.96698	0.000140922	0.000802422			Cup000186g043055.1	-0.995246	2.39112e-11	5.95933e-10					Cup000025g021809.1	Cup000002g001514.1
Cup000009g009656.1	0.965807	0.000889842	0.00395045			Cup000008g008628.1	-0.995113	0.00242901	0.00935871					Cup000026g022310.1	Cup000030g024275.1
Cup000001g000850.1	0.964363	0.00339015	0.0124682			Cup000019g017930.1	-0.994478	3.30124e-05	0.000224096					Cup000077g037059.1	Cup000001g000803.1
Cup000022g019736.1	0.962618	1.35987e-17	8.6311e-16			Cup000062g034865.1	-0.994028	7.88072e-08	1.0044e-06					Cup000041g029279.1	Cup000028g023219.1
Cup000102g039557.1	0.96245	1.28954e-12	3.94762e-11			Cup000005g005223.1	-0.993717	8.78715e-20	6.88544e-18					Cup000018g017264.1	Cup000044g030234.1
Cup000089g038197.1	0.961835	1.9798e-06	1.83621e-05			Cup000073g036597.1	-0.992766	1.54412e-12	4.67435e-11					Cup000005g005712.1	Cup000020g018752.1
Cup000051g032399.1	0.961588	3.47287e-13	1.16012e-11			Cup000020g018496.1	-0.992188	9.55485e-10	1.77563e-08					Cup000002g001618.1	Cup000012g012422.1
Cup000094g038829.1	0.96127	1.45113e-08	2.15027e-07			Cup000050g032233.A	-0.99185	0.00278424	0.0105146					Cup000098g039318.1	Cup000032g025435.1
Cup000038g027671.1	0.960615	0.000515871	0.00247463			Cup000051g032634.1	-0.991667	0.00449579	0.0158175					Cup000117g040494.1	Cup000043g030025.A
Cup000021g019578.1	0.960562	7.05927e-12	1.92022e-10			Cup000026g021905.1	-0.991376	2.28041e-09	3.96542e-08					Cup000132g041153.1	Cup000012g012635.1
Cup000021g019258.A	0.960467	5.09883e-08	6.81311e-07			Cup000039g028425.1	-0.991232	7.01034e-07	7.19202e-06					Cup000074g036656.1	Cup000025g021572.1
Cup000004g003868.1	0.95911	0.00253555	0.00971417			Cup000011g011331.1	-0.990379	4.67459e-06	3.91248e-05					Cup000098g039237.1	Cup000086g038010.1
Cup000024g020742.1	0.958088	0.000839815	0.00375726			Cup000104g039797.A	-0.988911	3.13343e-06	2.75202e-05					Cup000065g035339.1	Cup000022g019838.A
Cup000035g026968.1	0.957944	1.45619e-14	5.86202e-13			Cup000006g006079.1	-0.988364	0.000641529	0.00298591					Cup000099g039351.1	Cup000008g008239.1
Cup000046g031321.1	0.957543	6.68728e-08	8.69757e-07			Cup000003g002784.1	-0.987824	4.53731e-08	6.1273e-07					Cup000014g014897.1	Cup000005g005229.1
Cup000024g020706.1	0.957214	2.8109e-06	2.50456e-05			Cup000023g020451.1	-0.987409	0.00104985	0.00454528					Cup000009g009224.1	Cup000044g030441.1
Cup000040g028645.1	0.956931	2.44035e-07	2.75114e-06			Cup000046g031255.1	-0.987224	1.24885e-14	5.09192e-13					Cup000018g017476.1	Cup000174g042787.1
Cup000175g042805.1	0.956807	8.07775e-05	0.000493292			Cup000450g044601.1	-0.987031	0.000323518	0.0016613					Cup000006g006598.1	Cup000016g015546.1
Cup000053g033155.1	0.956804	0.000178546	0.000984845			Cup000013g013707.1	-0.986913	0.00638196	0.0210605					Cup000003g003304.1	Cup000027g022728.1
Cup000041g029132.1	0.956463	3.30482e-14	1.28685e-12			Cup000002g002063.1	-0.986837	1.1292e-06	1.10944e-05					Cup000032g025433.1	Cup000107g040114.1
Cup000008g008263.1	0.955735	6.31862e-11	1.46366e-09			Cup000009g009255.1	-0.986658	1.86888e-10	4.00736e-09					Cup000207g043401.1	Cup000026g022252.1
Cup000026g022384.1	0.955363	7.78227e-07	7.90726e-06			Cup000003g002770.1	-0.986524	2.26361e-08	3.24071e-07					Cup000029g023655.1	Cup000011g011927.1
Cup000004g004507.1	0.955181	0.00244935	0.00942756			Cup000026g022297.A	-0.985794	0.00408316	0.0145731					Cup000193g043196.1	Cup000019g017889.1
Cup000033g025582.A	0.954967	4.88717e-09	7.98084e-08			Cup000052g032754.1	-0.985724	0.000213978	0.00115913					Cup000009g009721.1	Cup000002g001680.1
Cup000011g012007.1	0.954761	1.17682e-12	3.63765e-11			Cup000001g001156.1	-0.985688	3.63142e-05	0.000244073					Cup000027g022745.1	Cup000056g033676.1
Cup000161g042345.1	0.953964	3.7798e-09	6.29669e-08			Cup000051g032617.1	-0.985685	0.00318622	0.0118309					Cup000004g003886.1	Cup000008g008677.1
Cup000043g030136.1	0.953674	0.000404868	0.00200236			Cup000009g009219.1	-0.984385	0.00013344	0.000764157					Cup000014g014599.1	Cup000010g010459.1
Cup000040g028507.1	0.95317	0.00780233	0.0249101			Cup000005g005784.1	-0.9834	8.25073e-06	6.50796e-05					Cup000064g035251.1	Cup000060g034486.1
Cup000079g037176.1	0.952579	1.64548e-08	2.41757e-07			Cup000084g037621.1	-0.9834	1.99844e-13	6.89353e-12					Cup000074g036746.1	Cup000129g041001.A
Cup000076g036921.1	0.952509	1.91512e-17	1.18012e-15			Cup000008g008775.1	-0.983329	0.00075568	0.00344232					Cup000001g000787.1	Cup000006g006692.1
Cup000010g010259.1	0.95187	3.35994e-15	1.48783e-13			Cup000008g008301.1	-0.983232	0.00154678	0.0063379					Cup000012g012339.1	Cup000083g037509.1
Cup000054g033404.1	0.951351	4.55913e-05	0.00029842			Cup000012g012311.1	-0.982501	4.48557e-07	4.79829e-06					Cup000006g006793.1	Cup000017g016828.1
Cup000117g040524.1	0.951276	0.0107174	0.0325678			Cup000048g031849.1	-0.981818	0.00085037	0.00379735					Cup000010g010219.1	Cup000017g016742.1
Cup000013g013007.1	0.951247	1.60364e-07	1.89188e-06			Cup000005g005070.1	-0.981534	8.61622e-08	1.09011e-06					Cup000056g033841.1	Cup000020g018565.1
Cup000061g034740.1	0.949921	9.42428e-06	7.31842e-05			Cup000010g010713.1	-0.981281	0.00419754	0.0149198					Cup000037g027345.A	Cup000004g004685.1
Cup000004g004297.1	0.949859	5.07293e-13	1.65684e-11			Cup000024g021121.1	-0.981123	0.0012817	0.00539325					Cup000006g006794.1	Cup000031g024643.1
Cup000141g041546.1	0.949845	7.36116e-19	5.41173e-17			Cup000021g019451.1	-0.980212	1.95815e-06	1.81878e-05					Cup000057g034079.1	Cup000001g001455.A
Cup000022g019812.1	0.949521	0.000178118	0.000983058			Cup000035g026605.1	-0.979833	0.000464744	0.00226786					Cup000001g001269.1	Cup000026g022006.1
Cup000004g004269.1	0.949215	2.18027e-10	4.60249e-09			Cup000092g038597.1	-0.978255	0.0017439	0.0070306					Cup000058g034155.1	Cup000214g043534.1
Cup000083g037563.1	0.949117	8.98666e-09	1.39005e-07			Cup000068g036007.1	-0.97755	9.66387e-06	7.49226e-05					Cup000001g000157.1	Cup000007g007606.1
Cup000013g013074.1	0.948203	1.26225e-09	2.28464e-08			Cup000003g002914.1	-0.977354	1.54379e-08	2.27871e-07					Cup000015g014957.1	Cup000055g033478.1
Cup000265g043897.1	0.947946	4.25097e-11	1.01943e-09			Cup000022g020063.1	-0.976708	8.1863e-07	8.29125e-06					Cup000001g001059.1	Cup000008g008113.1
Cup000038g027997.1	0.947663	7.92591e-06	6.2856e-05			Cup000133g041200.1	-0.975685	0.00111799	0.00479935					Cup000026g021918.1	Cup000042g029751.1
Cup000164g042443.1	0.946997	0.00012747	0.000733945			Cup000038g027777.1	-0.975373	0.000377845	0.00188833					Cup000045g030888.1	Cup000101g039406.A
Cup000023g020301.1	0.945829	3.17759e-06	2.78438e-05			Cup000006g006801.1	-0.974775	2.03708e-07	2.34652e-06					Cup000003g003536.A	Cup000013g013293.1
Cup000011g011951.1	0.944786	0.0176134	0.0485068			Cup000065g035401.1	-0.973083	6.35608e-05	0.000398374					Cup000032g025264.1	Cup000080g037242.1
Cup000015g015062.1	0.944481	0.00179659	0.00722011			Cup000031g024827.1	-0.972924	9.27748e-05	0.000556561					Cup000033g025581.1	Cup000019g018247.1
Cup000002g002257.1	0.944292	1.04122e-05	7.98144e-05			Cup000055g033504.1	-0.971585	0.000170692	0.000946734					Cup000152g042031.1	Cup000010g010864.1
Cup000027g022689.1	0.944234	5.65789e-16	2.86521e-14			Cup000077g037077.1	-0.971256	8.71262e-13	2.75577e-11					Cup000010g010854.1	Cup000018g017135.1
Cup000055g033459.1	0.944192	0.000382834	0.00190976			Cup000012g012711.1	-0.971034	0.00022992	0.00123495					Cup000006g006129.1	Cup000013g013693.1
Cup000017g016659.1	0.944186	3.25677e-06	2.84237e-05			Cup000041g029098.1	-0.971027	7.20207e-08	9.2817e-07					Cup000033g025964.1	Cup000003g003404.1
Cup000020g018550.1	0.943968	0.00104174	0.00451634			Cup000024g021020.1	-0.970158	4.51694e-13	1.48544e-11					Cup000031g024627.1	Cup000005g005498.1
Cup000016g015601.1	0.943861	4.50183e-05	0.000295075			Cup000006g006210.1	-0.9696	5.41416e-11	1.27116e-09					Cup000097g039198.1	Cup000009g009790.A
Cup000019g018266.1	0.943247	2.4361e-07	2.7496e-06			Cup000011g011780.A	-0.96788	0.0107594	0.0326485					Cup000038g027786.1	Cup000026g022305.1
Cup000005g005965.A	0.942483	3.7687e-05	0.000251966			Cup000049g032078.1	-0.967663	2.51787e-08	3.57515e-07					Cup000019g018213.1	Cup000005g005814.1
Cup000062g034858.A	0.941477	0.00162637	0.00661395			Cup000001g000959.1	-0.966895	8.12697e-05	0.000495821					Cup000003g003421.1	Cup000003g003148.1
Cup000053g033168.1	0.940135	5.30621e-09	8.58416e-08			Cup000092g038672.1	-0.966742	0.00194299	0.00771885					Cup000007g007441.1	Cup000005g005035.1
Cup000070g036210.1	0.939538	3.7332e-05	0.000249876			Cup000010g010410.1	-0.966525	0.00461309	0.0161764					Cup000014g014108.1	Cup000060g034575.1
Cup000101g039431.1	0.939109	2.10606e-07	2.4184e-06			Cup000004g003650.1	-0.966354	5.41813e-10	1.06248e-08					Cup000029g023716.1	Cup000097g039120.1
Cup000009g009051.1	0.938811	9.14903e-05	0.000550023			Cup000035g026703.1	-0.966277	1.7739e-10	3.82524e-09					Cup000041g029288.1	Cup000092g038612.1
Cup000022g019721.A	0.938772	0.00152196	0.00624695			Cup000034g026171.1	-0.9642	1.21924e-10	2.70578e-09					Cup000062g034841.1	Cup000026g021907.1
Cup000161g042349.1	0.938572	1.94531e-13	6.72245e-12			Cup000062g034866.1	-0.964096	1.57057e-05	0.000115242					Cup000013g013225.1	Cup000026g022270.1
Cup000039g028377.1	0.938496	1.54653e-11	4.01739e-10			Cup000012g012773.1	-0.96396	8.1329e-10	1.53477e-08					Cup000015g015231.1	Cup000006g006202.1
Cup000161g042348.1	0.938367	2.72402e-09	4.6602e-08			Cup000088g038158.1	-0.963851	0.000911865	0.0040313					Cup000030g024262.1	Cup000015g014974.1
Cup000014g014636.1	0.938359	0.00674892	0.022088			Cup000009g009113.1	-0.96349	6.2444e-06	5.07453e-05					Cup000031g024924.1	Cup000008g008064.1
Cup000038g027624.1	0.937451	1.36927e-07	1.63565e-06			Cup000028g022911.1	-0.963477	1.65681e-07	1.95097e-06					Cup000008g008061.1	Cup000019g018260.1
Cup000180g042919.1	0.937239	4.20108e-10	8.44696e-09			Cup000004g003813.A	-0.963258	0.0123333	0.0364148					Cup000150g041969.1	Cup000009g009694.1
Cup000008g008231.1	0.937088	1.51426e-13	5.32958e-12			Cup000002g001563.A	-0.963249	0.00489676	0.0169742					Cup000027g022684.1	Cup000097g039142.A
Cup000044g030178.1	0.936174	3.53669e-16	1.82499e-14			Cup000017g016312.1	-0.962624	1.01581e-08	1.55608e-07					Cup000017g016782.1	Cup000013g013169.1
Cup000022g020118.1	0.935734	9.62241e-05	0.00057328			Cup000026g022052.1	-0.961931	0.000364199	0.0018307					Cup000037g027463.1	Cup000002g002006.1
Cup000017g016461.1	0.935524	3.01865e-06	2.66226e-05			Cup000003g003173.1	-0.960593	0.000375391	0.0018815					Cup000037g027525.1	Cup000030g024428.1
Cup000012g012221.1	0.935482	4.71658e-06	3.94242e-05			Cup000007g007107.1	-0.960534	2.32757e-09	4.04004e-08					Cup000065g035472.1	Cup000064g035171.1
Cup000021g019141.1	0.934915	1.77389e-11	4.53888e-10			Cup000035g026592.1	-0.959401	0.0137967	0.0398578					Cup000104g039801.A	Cup000040g028741.1
Cup000063g035041.1	0.934375	1.50791e-11	3.92779e-10			Cup000018g017610.1	-0.959235	1.34777e-07	1.61504e-06					Cup000001g000419.1	Cup000024g020827.1
Cup000003g003189.1	0.933994	0.00683602	0.0223114			Cup000065g035358.A	-0.958498	0.00371946	0.0134977					Cup000006g006670.1	Cup000005g004889.1
Cup000023g020491.1	0.933711	2.00415e-20	1.75051e-18			Cup000029g023721.1	-0.958485	1.26098e-05	9.4343e-05					Cup000015g015210.1	Cup000091g038380.1
Cup000063g035102.1	0.933674	9.79786e-14	3.52002e-12			Cup000022g019725.1	-0.958343	0.00296693	0.0111207					Cup000019g018130.1	Cup000009g009828.1
Cup000012g012685.1	0.933094	5.32231e-05	0.000342256			Cup000017g016343.1	-0.957621	0.00503808	0.0173724					Cup000022g019713.1	Cup000030g024370.A
Cup000021g019376.1	0.932993	1.62821e-06	1.54754e-05			Cup000020g018920.1	-0.957217	1.17612e-07	1.43095e-06					Cup000039g028420.1	Cup000042g029570.1
Cup000026g022306.1	0.932922	9.85373e-14	3.53343e-12			Cup000009g009744.1	-0.957095	1.39678e-11	3.66003e-10					Cup000008g008749.1	Cup000093g038784.1
Cup000005g005694.1	0.931188	3.96094e-07	4.2828e-06			Cup000058g034097.1	-0.956612	2.71613e-07	3.04402e-06					Cup000009g009062.1	Cup000025g021630.1
Cup000044g030368.1	0.930921	2.94449e-09	5.02383e-08			Cup000038g028140.1	-0.956547	0.0150388	0.042733					Cup000046g031301.1	Cup000005g005176.1
Cup000065g035450.1	0.930825	6.30263e-07	6.51865e-06			Cup000038g028022.1	-0.955858	4.05963e-11	9.76003e-10					Cup000091g038367.1	Cup000034g026412.1
Cup000044g030489.1	0.930378	9.09546e-07	9.11989e-06			Cup000022g019742.1	-0.95585	1.06586e-07	1.30851e-06					Cup000004g004522.1	Cup000005g005523.1
Cup000073g036585.1	0.930248	3.63099e-09	6.0647e-08			Cup000012g012244.1	-0.955797	1.02674e-07	1.27109e-06					Cup000003g002689.1	Cup000032g025069.1
Cup000041g029083.1	0.930158	9.39263e-05	0.000561347			Cup000044g030209.1	-0.955598	3.5812e-06	3.09531e-05					Cup000062g034861.1	Cup000001g000267.A
Cup000002g002422.1	0.930059	7.6683e-07	7.79979e-06			Cup000040g028877.1	-0.955371	0.00669623	0.021953					Cup000046g031024.1	Cup000029g023466.1
Cup000011g012008.1	0.929738	0.00494353	0.017099			Cup000033g025615.1	-0.955227	0.00238311	0.00921169					Cup000094g038895.1	Cup000004g004387.1
Cup000032g025088.1	0.929428	2.95898e-06	2.61448e-05			Cup000027g022597.A	-0.954999	1.34038e-05	9.98912e-05					Cup000041g029364.1	Cup000013g013674.1
Cup000009g009120.1	0.929305	2.17777e-08	3.14144e-07			Cup000020g018923.1	-0.954821	0.000100992	0.000598875					Cup000004g003806.1	Cup000017g016228.1
Cup000032g025310.1	0.929241	7.72635e-12	2.08677e-10			Cup000004g004258.1	-0.954464	2.17244e-06	1.98395e-05					Cup000012g012242.1	Cup000138g041384.1
Cup000062g034823.1	0.928467	0.0116858	0.0348433			Cup000028g023137.1	-0.954261	2.43534e-06	2.19666e-05					Cup000084g037607.1	Cup000007g007075.1
Cup000002g002286.1	0.928266	7.89496e-12	2.12628e-10			Cup000085g037848.1	-0.953706	0.000469467	0.00228622					Cup000038g027674.1	Cup000019g018197.1
Cup000019g018291.1	0.928198	6.29894e-05	0.000396228			Cup000024g021224.1	-0.952989	5.7743e-07	6.02788e-06					Cup000062g034806.1	Cup000038g027966.A
Cup000014g014132.1	0.927647	7.9597e-10	1.50657e-08			Cup000097g039124.1	-0.952691	0.000104508	0.000616462					Cup000009g009366.A	Cup000024g021094.1
Cup000034g026372.1	0.927425	9.91278e-07	9.82557e-06			Cup000024g020789.1	-0.951922	1.09872e-07	1.34482e-06					Cup000008g008683.1	Cup000101g039419.1
Cup000001g000215.1	0.927384	1.90312e-07	2.20825e-06			Cup008747g047006.A	-0.950901	0.0154741	0.043722					Cup000038g027750.A	Cup000016g015593.1
Cup000024g020685.1	0.927083	0.00480629	0.0167196			Cup000045g030837.1	-0.950671	0.000134158	0.00076758					Cup000021g019150.1	Cup000056g033685.1
Cup000007g007078.1	0.926551	3.98119e-07	4.30226e-06			Cup000017g016815.1	-0.950341	0.00662201	0.0217373					Cup000026g022029.1	Cup000043g030085.1
Cup000022g019614.1	0.926024	5.01776e-10	9.95241e-09			Cup000030g023952.1	-0.949021	0.00309043	0.0115314					Cup000004g003730.1	Cup000162g042391.1
Cup000038g027892.1	0.925779	1.64076e-10	3.56233e-09			Cup000001g000809.1	-0.948576	0.000103098	0.000609276					Cup000032g025120.1	Cup000060g034390.1
Cup000066g035589.1	0.925604	1.45598e-06	1.39876e-05			Cup000009g009192.1	-0.948411	0.000147018	0.000832897					Cup000007g007084.1	Cup000053g033067.1
Cup000041g028967.1	0.925129	0.000218014	0.00117851			Cup000020g018936.1	-0.947917	4.3325e-06	3.65849e-05					Cup000029g023719.1	Cup000059g034277.1
Cup000005g005094.1	0.924862	1.37745e-08	2.05066e-07			Cup000147g041854.1	-0.947658	1.62804e-11	4.20617e-10					Cup000006g006667.1	Cup000450g044604.1
Cup000010g010338.1	0.924383	2.34299e-07	2.65711e-06			Cup000051g032445.1	-0.94737	0.000152751	0.000862296					Cup000015g015258.1	Cup000003g002650.1
Cup000107g040145.1	0.924059	9.30461e-18	6.04672e-16			Cup000038g027998.1	-0.947003	0.00536876	0.0182776					Cup000042g029688.1	Cup000008g008562.1
Cup000087g038086.1	0.923653	1.47761e-07	1.75626e-06			Cup000011g011935.1	-0.946302	0.000142083	0.000808063					Cup000064g035135.1	Cup000024g020770.1
Cup000037g027438.1	0.923596	1.12497e-05	8.53749e-05			Cup000027g022715.1	-0.945968	3.64301e-05	0.000244507					Cup000065g035441.A	Cup000168g042563.1
Cup000004g004241.A	0.923502	0.000849333	0.00379361			Cup000004g003715.1	-0.94574	0.0045384	0.0159527					Cup000016g015951.1	Cup000040g028833.1
Cup000002g001729.A	0.923313	2.48967e-06	2.24247e-05			Cup000093g038783.1	-0.945273	1.16317e-10	2.58435e-09					Cup000041g029118.1	Cup000030g023992.1
Cup000058g034128.1	0.923119	0.00879246	0.0276357			Cup000040g028509.1	-0.944919	0.00421045	0.0149573					Cup000031g024617.1	Cup000001g000072.1
Cup000020g018771.1	0.922863	5.71217e-11	1.33454e-09			Cup000011g011748.1	-0.944705	1.93921e-07	2.24601e-06					Cup000023g020328.1	Cup000029g023534.1
Cup000028g022978.1	0.921939	3.08582e-07	3.42009e-06			Cup000013g013705.1	-0.94424	0.004896	0.0169742					Cup000001g000202.1	Cup000014g014689.1
Cup000009g009757.1	0.921825	7.58225e-12	2.05076e-10			Cup000014g014300.1	-0.944034	0.00400596	0.0143433					Cup000008g008737.1	Cup000029g023384.1
Cup000061g034747.1	0.921758	1.44933e-19	1.1083e-17			Cup000011g011381.1	-0.943878	2.09064e-10	4.43789e-09					Cup000035g026635.1	Cup000026g022354.A
Cup000010g010156.1	0.921297	0.00066072	0.00305845			Cup000017g016341.1	-0.942474	8.59897e-06	6.7491e-05					Cup000037g027309.1	Cup000043g029997.1
Cup000457g044621.1	0.921021	2.25409e-07	2.56853e-06			Cup000054g033241.1	-0.942419	1.05402e-09	1.94473e-08					Cup000089g038235.1	Cup000084g037698.1
Cup000077g037046.1	0.92071	0.000200205	0.00109073			Cup000009g009717.1	-0.942349	0.0135162	0.0392202					Cup000015g015262.1	Cup000030g023989.1
Cup000008g008270.1	0.920692	1.44553e-13	5.09709e-12			Cup000066g035800.A	-0.94164	0.00053313	0.00254355					Cup000086g037975.1	Cup000001g001169.1
Cup000018g017564.1	0.920249	6.35341e-05	0.000398374			Cup000017g016747.1	-0.941567	3.85532e-06	3.30225e-05					Cup000023g020362.1	Cup000008g008121.1
Cup000055g033603.A	0.920225	1.10361e-12	3.42244e-11			Cup000001g000869.1	-0.941536	0.013269	0.03865					Cup000033g025565.1	Cup000096g039008.1
Cup000011g011198.1	0.919144	6.51578e-15	2.77555e-13			Cup000003g003139.1	-0.941296	3.53429e-10	7.2284e-09					Cup000084g037715.1	Cup000029g023628.A
Cup000004g003779.1	0.918935	8.02906e-08	1.02193e-06			Cup000065g035331.1	-0.941144	2.1271e-14	8.45555e-13					Cup000019g018133.1	Cup000093g038776.1
Cup000009g009850.1	0.918556	5.06592e-05	0.000328543			Cup000027g022775.1	-0.941017	3.85972e-05	0.000257148					Cup000004g004513.1	Cup000071g036355.1
Cup000041g029344.1	0.918419	1.72048e-06	1.62579e-05			Cup000010g010987.1	-0.940179	0.000605868	0.00283867					Cup000058g034111.1	Cup000006g006224.1
Cup000009g009781.1	0.918302	9.04147e-06	7.0499e-05			Cup000134g041299.1	-0.939795	5.694e-08	7.52913e-07					Cup000041g029348.A	Cup000045g030616.A
Cup000071g036299.1	0.916925	5.417e-08	7.2079e-07			Cup000008g008140.1	-0.939003	1.56155e-05	0.000114624					Cup000018g017047.A	Cup000022g020106.1
Cup000066g035561.1	0.916853	6.27319e-13	2.02454e-11			Cup000041g029217.1	-0.938732	0.000212653	0.00115261					Cup000030g024006.1	Cup000007g007115.1
Cup000002g001653.1	0.916732	3.12925e-09	5.29166e-08			Cup000064g035227.1	-0.93768	4.80215e-06	4.00867e-05					Cup000134g041270.1	Cup000020g018597.1
Cup000083g037472.1	0.916242	9.56945e-05	0.000570482			Cup000044g030243.1	-0.93585	0.00342351	0.0125715					Cup000895g045341.1	Cup000008g008053.1
Cup000031g024830.1	0.915714	2.22742e-08	3.20093e-07			Cup000042g029672.1	-0.935462	9.15243e-09	1.41339e-07					Cup000011g011743.1	Cup000025g021350.A
Cup000038g027934.1	0.91536	4.37642e-05	0.000287449			Cup000013g013609.1	-0.934787	0.00417387	0.0148523					Cup000016g015695.1	Cup000066g035572.1
Cup000009g009353.1	0.914987	2.96257e-06	2.61636e-05			Cup000021g019441.1	-0.93418	0.000897077	0.00397793					Cup000143g041674.1	Cup000013g013075.1
Cup000016g015435.1	0.914498	0.00605979	0.0201686			Cup000004g003691.A	-0.932847	0.0121094	0.0359101					Cup000045g030856.1	Cup000117g040530.1
Cup000069g036052.1	0.914464	1.19911e-09	2.18491e-08			Cup000029g023873.A	-0.932342	0.000128816	0.000740802					Cup000003g002780.1	Cup000019g018178.1
Cup000006g006312.1	0.91441	0.00514417	0.0176678			Cup000072g036494.1	-0.931725	0.0142099	0.0408343					Cup000044g030279.1	Cup000001g000168.1
Cup000018g017156.1	0.913895	3.10074e-14	1.21484e-12			Cup000025g021426.1	-0.93129	0.000518628	0.00248495					Cup000013g012987.1	Cup000002g001791.1
Cup000019g017756.1	0.913854	2.38144e-10	4.9775e-09			Cup000027g022748.1	-0.928185	5.46691e-07	5.73213e-06					Cup000006g006361.1	Cup000072g036393.1
Cup000012g012256.1	0.913294	9.86954e-13	3.08581e-11			Cup000010g010932.1	-0.926704	3.7341e-10	7.59626e-09					Cup000033g025874.1	Cup000022g020040.1
Cup000022g019954.1	0.912882	1.18836e-05	8.95433e-05			Cup000005g005125.1	-0.926478	0.000221513	0.00119452					Cup000151g042006.1	Cup000020g018859.1
Cup000021g019119.1	0.912774	0.00929367	0.0289483			Cup000004g004473.1	-0.924968	1.86841e-05	0.000134251					Cup000047g031565.1	Cup000015g015180.1
Cup000038g027912.1	0.912393	4.68537e-10	9.35158e-09			Cup000008g008701.1	-0.924751	4.23205e-13	1.39658e-11					Cup000065g035306.A	Cup000017g016270.1
Cup000020g018447.1	0.912032	5.85996e-08	7.71643e-07			Cup000016g015464.A	-0.924624	7.55278e-10	1.43812e-08					Cup000074g036677.1	Cup000004g004326.A
Cup000010g010258.1	0.911076	3.52989e-09	5.92703e-08			Cup000040g028801.1	-0.924344	1.40098e-07	1.66934e-06					Cup000016g015616.1	Cup001165g045585.1
Cup000018g017203.1	0.911046	3.50523e-06	3.03378e-05			Cup000018g017552.1	-0.924086	0.00209962	0.00823288					Cup000020g018836.1	Cup000041g029052.1
Cup000047g031512.1	0.910646	5.72575e-10	1.11934e-08			Cup000007g007324.1	-0.923683	5.21649e-07	5.49984e-06					Cup000019g017947.1	Cup000114g040372.A
Cup000023g020501.1	0.910379	5.75092e-07	6.00676e-06			Cup000016g016137.A	-0.923654	0.000971651	0.00425815					Cup000033g025627.1	Cup000014g014772.1
Cup000010g010383.1	0.910307	2.26451e-10	4.76448e-09			Cup000148g041881.1	-0.923274	0.00488165	0.016928					Cup000019g017941.1	Cup000024g020787.1
Cup000025g021809.1	0.909948	5.23847e-05	0.000337777			Cup000051g032550.1	-0.922961	1.236e-06	1.20382e-05					Cup000064g035230.1	Cup000004g003735.1
Cup000026g022310.1	0.909877	4.1299e-08	5.63709e-07			Cup000013g013139.1	-0.922679	6.91644e-06	5.57325e-05					Cup000025g021646.1	Cup000034g026193.1
Cup000077g037059.1	0.909646	3.82692e-11	9.21219e-10			Cup000043g030002.1	-0.92232	1.4904e-06	1.42822e-05					Cup000033g025857.1	Cup000003g002767.1
Cup000041g029279.1	0.909527	2.3574e-10	4.94354e-09			Cup000021g019479.1	-0.921993	1.58148e-08	2.33072e-07					Cup006211g046841.A	Cup000075g036840.1
Cup000018g017264.1	0.909516	1.35708e-09	2.43088e-08			Cup000040g028644.1	-0.920752	3.13016e-06	2.75041e-05					Cup000026g022085.1	Cup000007g007838.1
Cup000005g005712.1	0.909273	2.35331e-09	4.06988e-08			Cup000009g009286.1	-0.92069	0.00615332	0.0204204					Cup000009g009237.1	Cup000030g024119.1
Cup000002g001618.1	0.908304	1.05847e-10	2.37109e-09			Cup000052g032809.1	-0.92067	5.61797e-10	1.0994e-08					Cup000028g022935.1	Cup000265g043893.1
Cup000098g039318.1	0.907567	0.000318949	0.00163958			Cup000018g017529.1	-0.91949	0.00319882	0.0118679					Cup000021g019455.1	Cup000112g040324.1
Cup000117g040494.1	0.907364	0.00129162	0.0054301			Cup000065g035437.1	-0.919461	3.35095e-12	9.60925e-11					Cup000390g044437.1	Cup000105g039860.1
Cup000132g041153.1	0.907342	1.1346e-05	8.60147e-05			Cup000013g013060.1	-0.919081	0.000136098	0.000777746					Cup000094g038827.1	Cup000025g021689.1
Cup000074g036656.1	0.907128	7.88185e-10	1.49332e-08			Cup000056g033715.1	-0.918772	1.5567e-09	2.76503e-08					Cup000023g020324.1	Cup000050g032267.1
Cup000098g039237.1	0.906906	2.18116e-12	6.40919e-11			Cup000021g019200.1	-0.918041	0.00482619	0.0167815					Cup000011g012158.A	Cup000040g028600.1
Cup000065g035339.1	0.90682	6.64321e-15	2.82351e-13			Cup000023g020368.1	-0.9175	8.36554e-05	0.00050907					Cup000004g004598.1	Cup000017g016831.1
Cup000099g039351.1	0.906743	0.0011067	0.00475788			Cup000005g005549.1	-0.91714	0.00560269	0.0189251					Cup000002g001700.1	Cup000001g000116.1
Cup000014g014897.1	0.906652	0.00048751	0.00236381			Cup000013g013892.1	-0.916244	1.03673e-05	7.95983e-05					Cup000054g033246.1	Cup000018g017175.1
Cup000009g009224.1	0.90478	3.63964e-10	7.41201e-09			Cup000072g036425.1	-0.915435	0.0103757	0.0317125					Cup000041g029251.1	Cup000010g010908.1
Cup000018g017476.1	0.90475	1.03039e-14	4.28378e-13			Cup000020g018589.1	-0.915115	2.84028e-07	3.1701e-06					Cup000024g021052.1	Cup000008g008325.1
Cup000006g006598.1	0.904567	1.49389e-11	3.89661e-10			Cup000041g029309.1	-0.914004	5.97957e-11	1.39189e-09					Cup000063g035029.1	Cup000048g031681.1
Cup000003g003304.1	0.904508	0.00473448	0.0165078			Cup000076g036923.1	-0.913964	0.00105875	0.00458068					Cup000009g009796.1	Cup000017g016258.1
Cup000032g025433.1	0.904276	2.57204e-06	2.31229e-05			Cup000119g040597.A	-0.91311	8.74028e-05	0.000528801					Cup000030g024110.1	Cup000035g026964.1
Cup000207g043401.1	0.903913	3.43599e-07	3.75788e-06			Cup000168g042522.A	-0.912734	0.00249464	0.00957476					Cup000010g010234.1	Cup000040g028847.1
Cup000029g023655.1	0.903378	2.25709e-07	2.56938e-06			Cup000035g026868.1	-0.912306	0.0168328	0.0468384					Cup000033g026010.1	Cup000014g014633.1
Cup000193g043196.1	0.90337	1.47401e-07	1.75307e-06			Cup000013g013727.1	-0.911943	3.67737e-06	3.1698e-05					Cup000052g032898.1	Cup000012g012228.1
Cup000009g009721.1	0.902654	4.40825e-05	0.00028934			Cup000009g009684.1	-0.91183	0.00218495	0.00852183					Cup000002g002416.A	Cup000154g042118.1
Cup000031g024971.1	0.901468	0.00715893	0.0231786			Cup000014g014539.1	-0.911746	0.000171389	0.00094977					Cup000033g025911.1	Cup000010g010213.1
Cup000027g022745.1	0.901166	0.000221515	0.00119452			Cup000038g027922.1	-0.911385	0.00107436	0.00464084					Cup000010g010695.1	Cup000052g032735.1
Cup000004g003886.1	0.900963	4.19002e-08	5.7028e-07			Cup000005g005007.1	-0.911111	1.02578e-05	7.88848e-05					Cup000077g037105.1	Cup000035g026845.1
Cup000014g014599.1	0.900024	7.04359e-09	1.11393e-07			Cup000161g042352.1	-0.910632	1.17327e-05	8.85467e-05					Cup000025g021290.1	Cup000006g006781.1
Cup000064g035251.1	0.899559	0.000220209	0.00118883			Cup000012g012425.1	-0.909131	0.0112714	0.0338782					Cup000020g018889.1	Cup000025g021474.1
Cup000074g036746.1	0.899513	9.59167e-08	1.20076e-06			Cup000035g026546.1	-0.907836	0.000601556	0.00282054					Cup000091g038330.1	Cup000003g002622.1
Cup000001g000787.1	0.899279	2.85981e-06	2.54219e-05			Cup000006g006583.1	-0.906286	0.0173791	0.0480355					Cup000060g034415.1	Cup000098g039255.1
Cup000012g012339.1	0.898365	0.0179898	0.0493721			Cup000025g021648.1	-0.905353	0.0140128	0.0403719					Cup000080g037251.1	Cup000001g000321.1
Cup000006g006793.1	0.898178	6.5201e-16	3.24998e-14			Cup000003g002613.A	-0.904936	0.000433525	0.00213081					Cup000017g016436.1	Cup000077g036980.1
Cup000010g010219.1	0.897782	6.85173e-09	1.08901e-07			Cup000014g014780.1	-0.904888	7.57685e-11	1.72986e-09					Cup000163g042424.1	Cup000054g033231.1
Cup000056g033841.1	0.896859	5.45851e-06	4.49937e-05			Cup000014g014121.1	-0.903573	0.00432642	0.0153036					Cup000120g040650.1	Cup000032g025360.1
Cup000037g027345.A	0.896023	1.02859e-07	1.27178e-06			Cup000014g014209.1	-0.901843	0.000650834	0.00302183					Cup000033g025666.1	Cup000029g023372.1
Cup000006g006794.1	0.895854	7.35883e-07	7.51311e-06			Cup000003g003154.A	-0.901811	0.000160354	0.000899085					Cup000019g017844.1	Cup000007g007060.1
Cup000057g034079.1	0.895821	0.00995281	0.0306355			Cup000020g018577.1	-0.901526	0.0041755	0.0148553					Cup000018g017542.A	Cup000040g028637.1
Cup000022g019808.1	0.895568	0.00580883	0.0194866			Cup000008g008374.A	-0.901436	0.00107665	0.0046476					Cup000142g041598.1	Cup000067g035864.1
Cup000001g001269.1	0.895532	0.0111909	0.0336736			Cup000008g008203.1	-0.901366	0.0101014	0.0310221					Cup000029g023674.1	Cup000812g045246.1
Cup000058g034155.1	0.894933	3.50529e-10	7.1768e-09			Cup000004g003664.1	-0.900782	0.0143053	0.0410344					Cup000021g019356.1	Cup000025g021619.1
Cup000001g000157.1	0.893785	7.83679e-12	2.1136e-10			Cup000020g018792.1	-0.900769	4.47167e-12	1.26141e-10					Cup000016g015676.A	Cup000015g015286.1
Cup000015g014957.1	0.892117	8.72378e-10	1.63816e-08			Cup000032g025441.1	-0.899472	2.42738e-08	3.45697e-07					Cup000086g037919.1	Cup000009g009404.A
Cup000001g001059.1	0.892049	4.80449e-05	0.00031276			Cup000016g015894.1	-0.899388	4.70592e-13	1.54226e-11					Cup000007g007404.1	Cup000065g035338.1
Cup000026g021918.1	0.892038	3.6421e-05	0.000244507			Cup000144g041756.A	-0.899032	0.00892051	0.0279735					Cup000021g019436.1	Cup000005g004924.1
Cup000045g030888.1	0.890916	0.000273472	0.00143765			Cup000018g017052.1	-0.898703	0.0038457	0.0138738					Cup000007g007082.1	Cup000086g037914.1
Cup000077g036950.1	0.890909	0.00692943	0.0225699			Cup000001g000795.1	-0.898271	5.94885e-09	9.55077e-08					Cup000013g013671.1	Cup000020g019009.A
Cup000003g003536.A	0.890788	0.016028	0.0449867			Cup000008g008555.1	-0.89724	1.62866e-09	2.88209e-08					Cup000005g005147.1	Cup000014g014363.1
Cup000032g025264.1	0.890692	3.46225e-11	8.40877e-10			Cup000037g027520.1	-0.896989	0.00185317	0.00739908					Cup000031g024942.1	Cup000017g016646.A
Cup000033g025581.1	0.890355	0.000221739	0.00119539			Cup000022g019611.1	-0.896415	7.6994e-10	1.46166e-08					Cup000011g011200.1	Cup000013g013548.1
Cup000152g042031.1	0.889339	1.47235e-12	4.47844e-11			Cup000092g038534.1	-0.896367	0.000226821	0.00122003					Cup000041g029265.1	Cup000019g018180.1
Cup000010g010854.1	0.889336	1.84864e-07	2.15422e-06			Cup000001g001046.1	-0.895841	0.0176534	0.0486099					Cup000009g008993.1	Cup000014g014342.1
Cup000006g006129.1	0.889013	1.63795e-07	1.93116e-06			Cup000025g021453.1	-0.895515	9.93425e-15	4.16573e-13					Cup000035g026951.A	Cup000012g012811.1
Cup000033g025964.1	0.888465	0.00232489	0.00901411			Cup000539g044833.1	-0.895029	1.47968e-07	1.75761e-06					Cup000062g034986.1	Cup000117g040493.1
Cup000031g024627.1	0.887341	0.00190645	0.00758954			Cup000021g019159.1	-0.894836	0.0169795	0.0471682					Cup000095g038974.1	Cup000003g003166.1
Cup000097g039198.1	0.887319	3.71682e-06	3.19832e-05			Cup000035g026961.1	-0.894426	2.1367e-08	3.08452e-07					Cup000103g039665.1	Cup000152g042028.1
Cup000038g027786.1	0.886882	8.84622e-09	1.37167e-07			Cup000649g045008.1	-0.894165	0.00370758	0.0134597					Cup000003g003254.1	Cup000001g001213.1
Cup000713g045109.1	0.886529	0.0092047	0.0287181			Cup000022g019804.1	-0.89406	0.00368714	0.0133932					Cup000004g004587.1	Cup000044g030249.1
Cup000019g018213.1	0.886505	7.36423e-09	1.15982e-07			Cup000006g006138.1	-0.892927	6.59983e-10	1.27194e-08					Cup000014g014391.A	Cup000006g006199.1
Cup000003g003421.1	0.886458	5.97714e-09	9.58002e-08			Cup000032g025106.1	-0.892862	0.000279489	0.00146403					Cup000207g043402.1	Cup000011g011833.1
Cup000007g007441.1	0.886385	0.00101492	0.00442019			Cup000006g006362.1	-0.892636	0.0181364	0.0496455					Cup000009g008997.1	Cup000003g003229.1
Cup000014g014108.1	0.886329	0.00254434	0.00973999			Cup000037g027501.1	-0.891629	4.35023e-07	4.66401e-06					Cup000023g020241.1	Cup000083g037559.1
Cup000021g019241.1	0.885539	0.0069587	0.0226479			Cup000035g026699.1	-0.891605	1.07158e-07	1.31469e-06					Cup000039g028265.1	Cup000014g014744.A
Cup000029g023716.1	0.885448	8.85941e-14	3.20099e-12			Cup000037g027603.1	-0.891505	0.00671966	0.0220222					Cup000091g038362.1	Cup000054g033405.1
Cup000041g029288.1	0.885362	1.07404e-11	2.86426e-10			Cup000024g020762.1	-0.891174	2.03687e-06	1.87998e-05					Cup000033g025671.1	Cup000014g014114.1
Cup000062g034841.1	0.884926	0.000250172	0.00133096			Cup000034g026424.1	-0.890924	0.0140436	0.0404301					Cup000030g024067.1	Cup000098g039300.1
Cup000013g013225.1	0.884588	1.93037e-09	3.38454e-08			Cup000005g005037.1	-0.890398	1.29532e-05	9.67222e-05					Cup000051g032612.1	Cup000007g007088.1
Cup000015g015231.1	0.884528	2.59441e-09	4.45046e-08			Cup000013g013863.1	-0.889842	1.62011e-05	0.000118445					Cup000019g018403.1	Cup000050g032262.1
Cup000030g024262.1	0.883817	5.84788e-05	0.000371288			Cup000062g034850.1	-0.889765	1.05543e-05	8.07734e-05					Cup000016g015834.1	Cup000014g014097.1
Cup000031g024924.1	0.883782	1.23237e-09	2.23482e-08			Cup000032g025355.1	-0.889714	0.000410039	0.00202688					Cup000049g031971.1	Cup000140g041459.1
[truncated: 2,650 more rows]

## Sheet: (3) GO annotation
Gene_ID	Gene ontology (GO) term end Enzyme code (EC)
[truncated: 339,904+ more rows]

## Sheet: (4) AgriGo Up
GO term	Ontology	Description	Number in input list	Number in BG/Ref	p-value	FDR
[truncated: 139 more rows]

[truncated: 2 more sheets: (5) AgriGo Down, Additional Figures]
